# Supplementary figures and images for: A library of 1,2,3-triazole-substituted oleanolic acid derivatives as anticancer agents: design, synthesis, and biological evaluation
Source: Royal Society of Chemistry journal article supplement (doi:10.1039/c4ob01605j), 2014-11-19

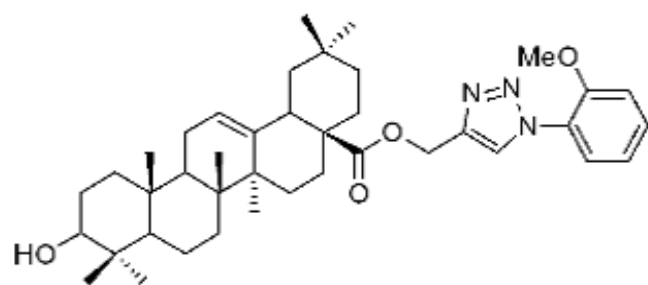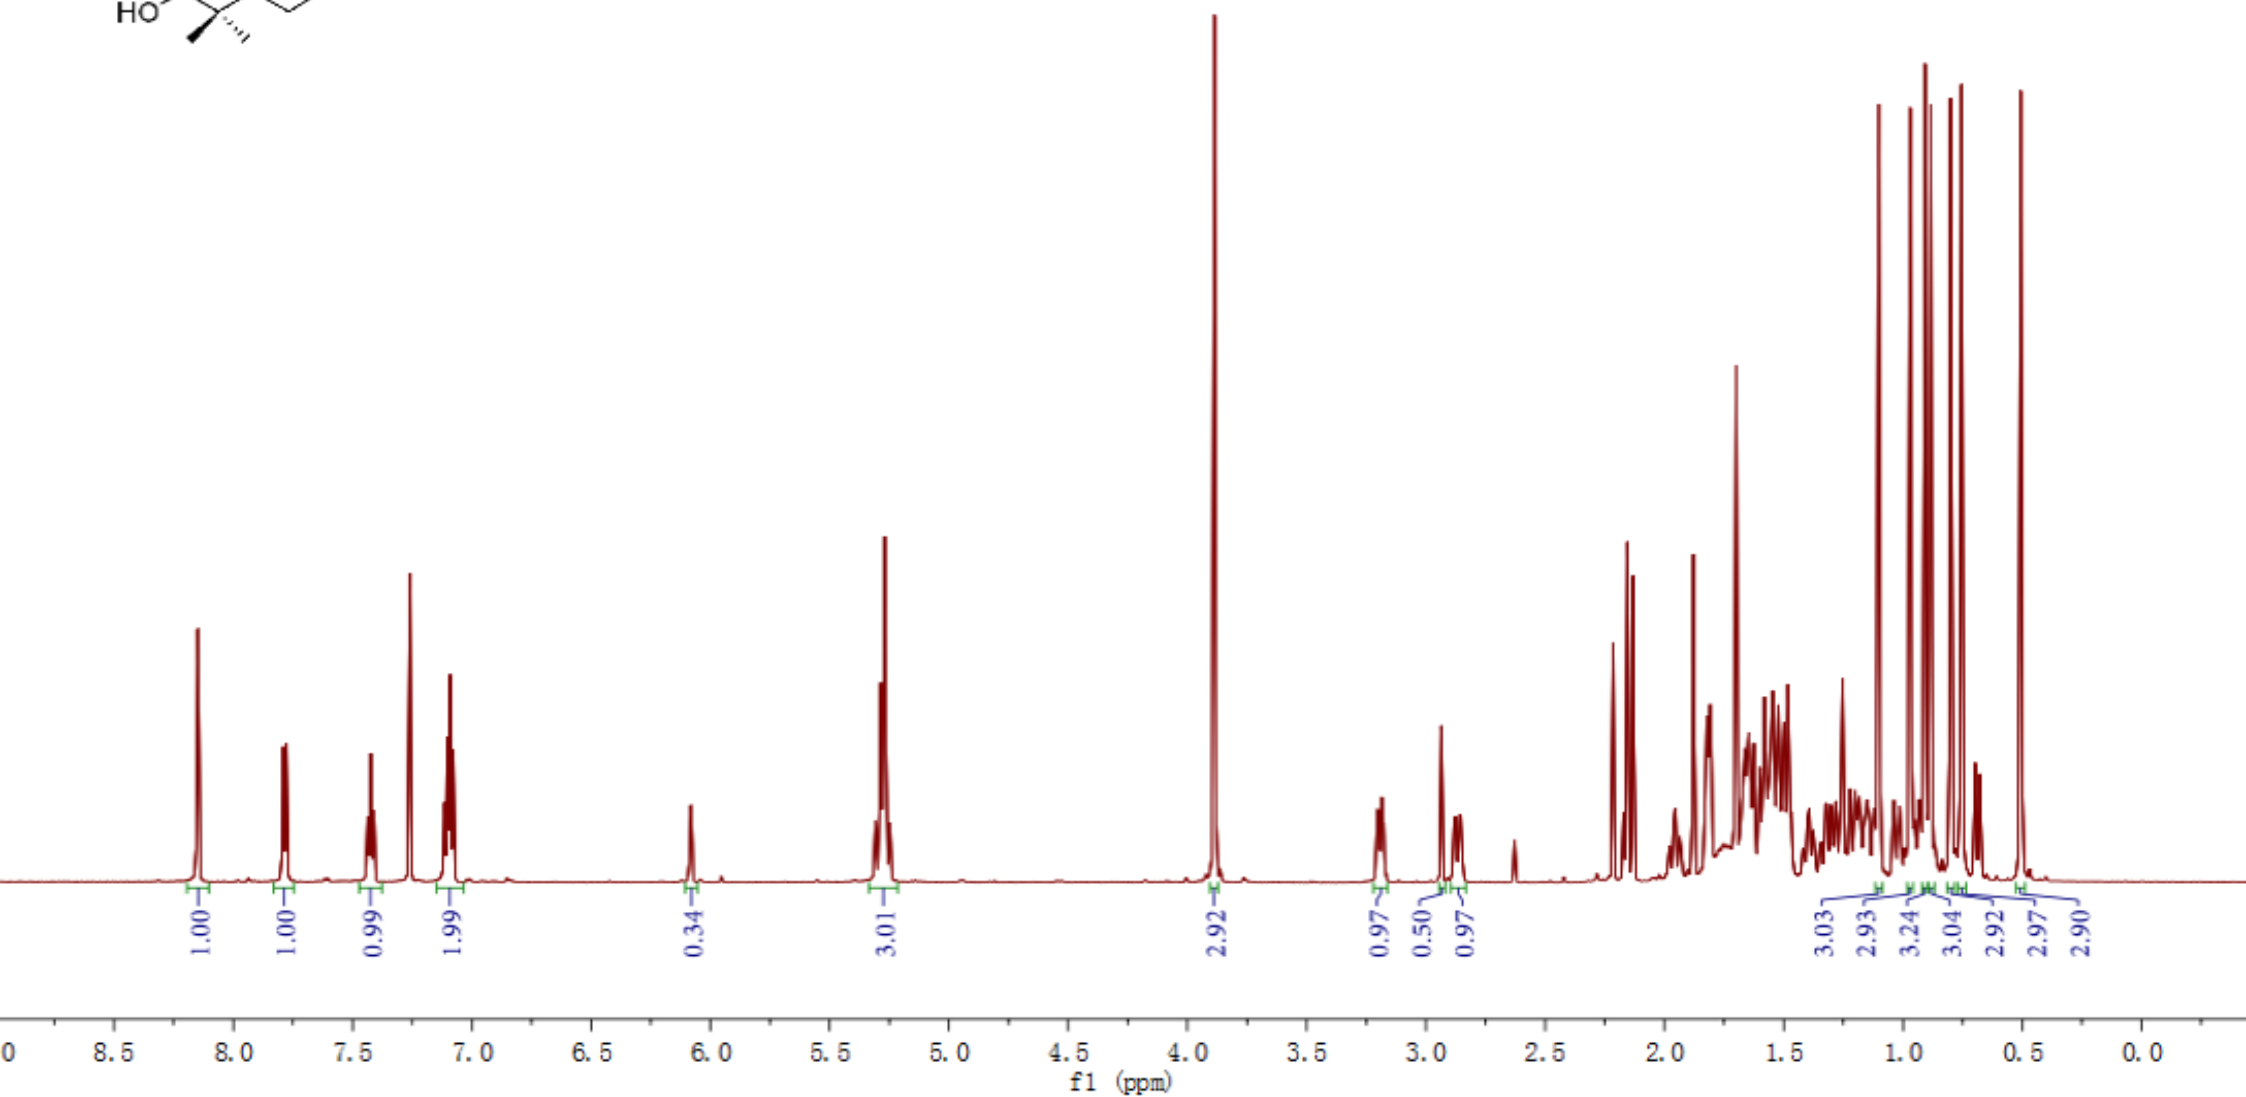

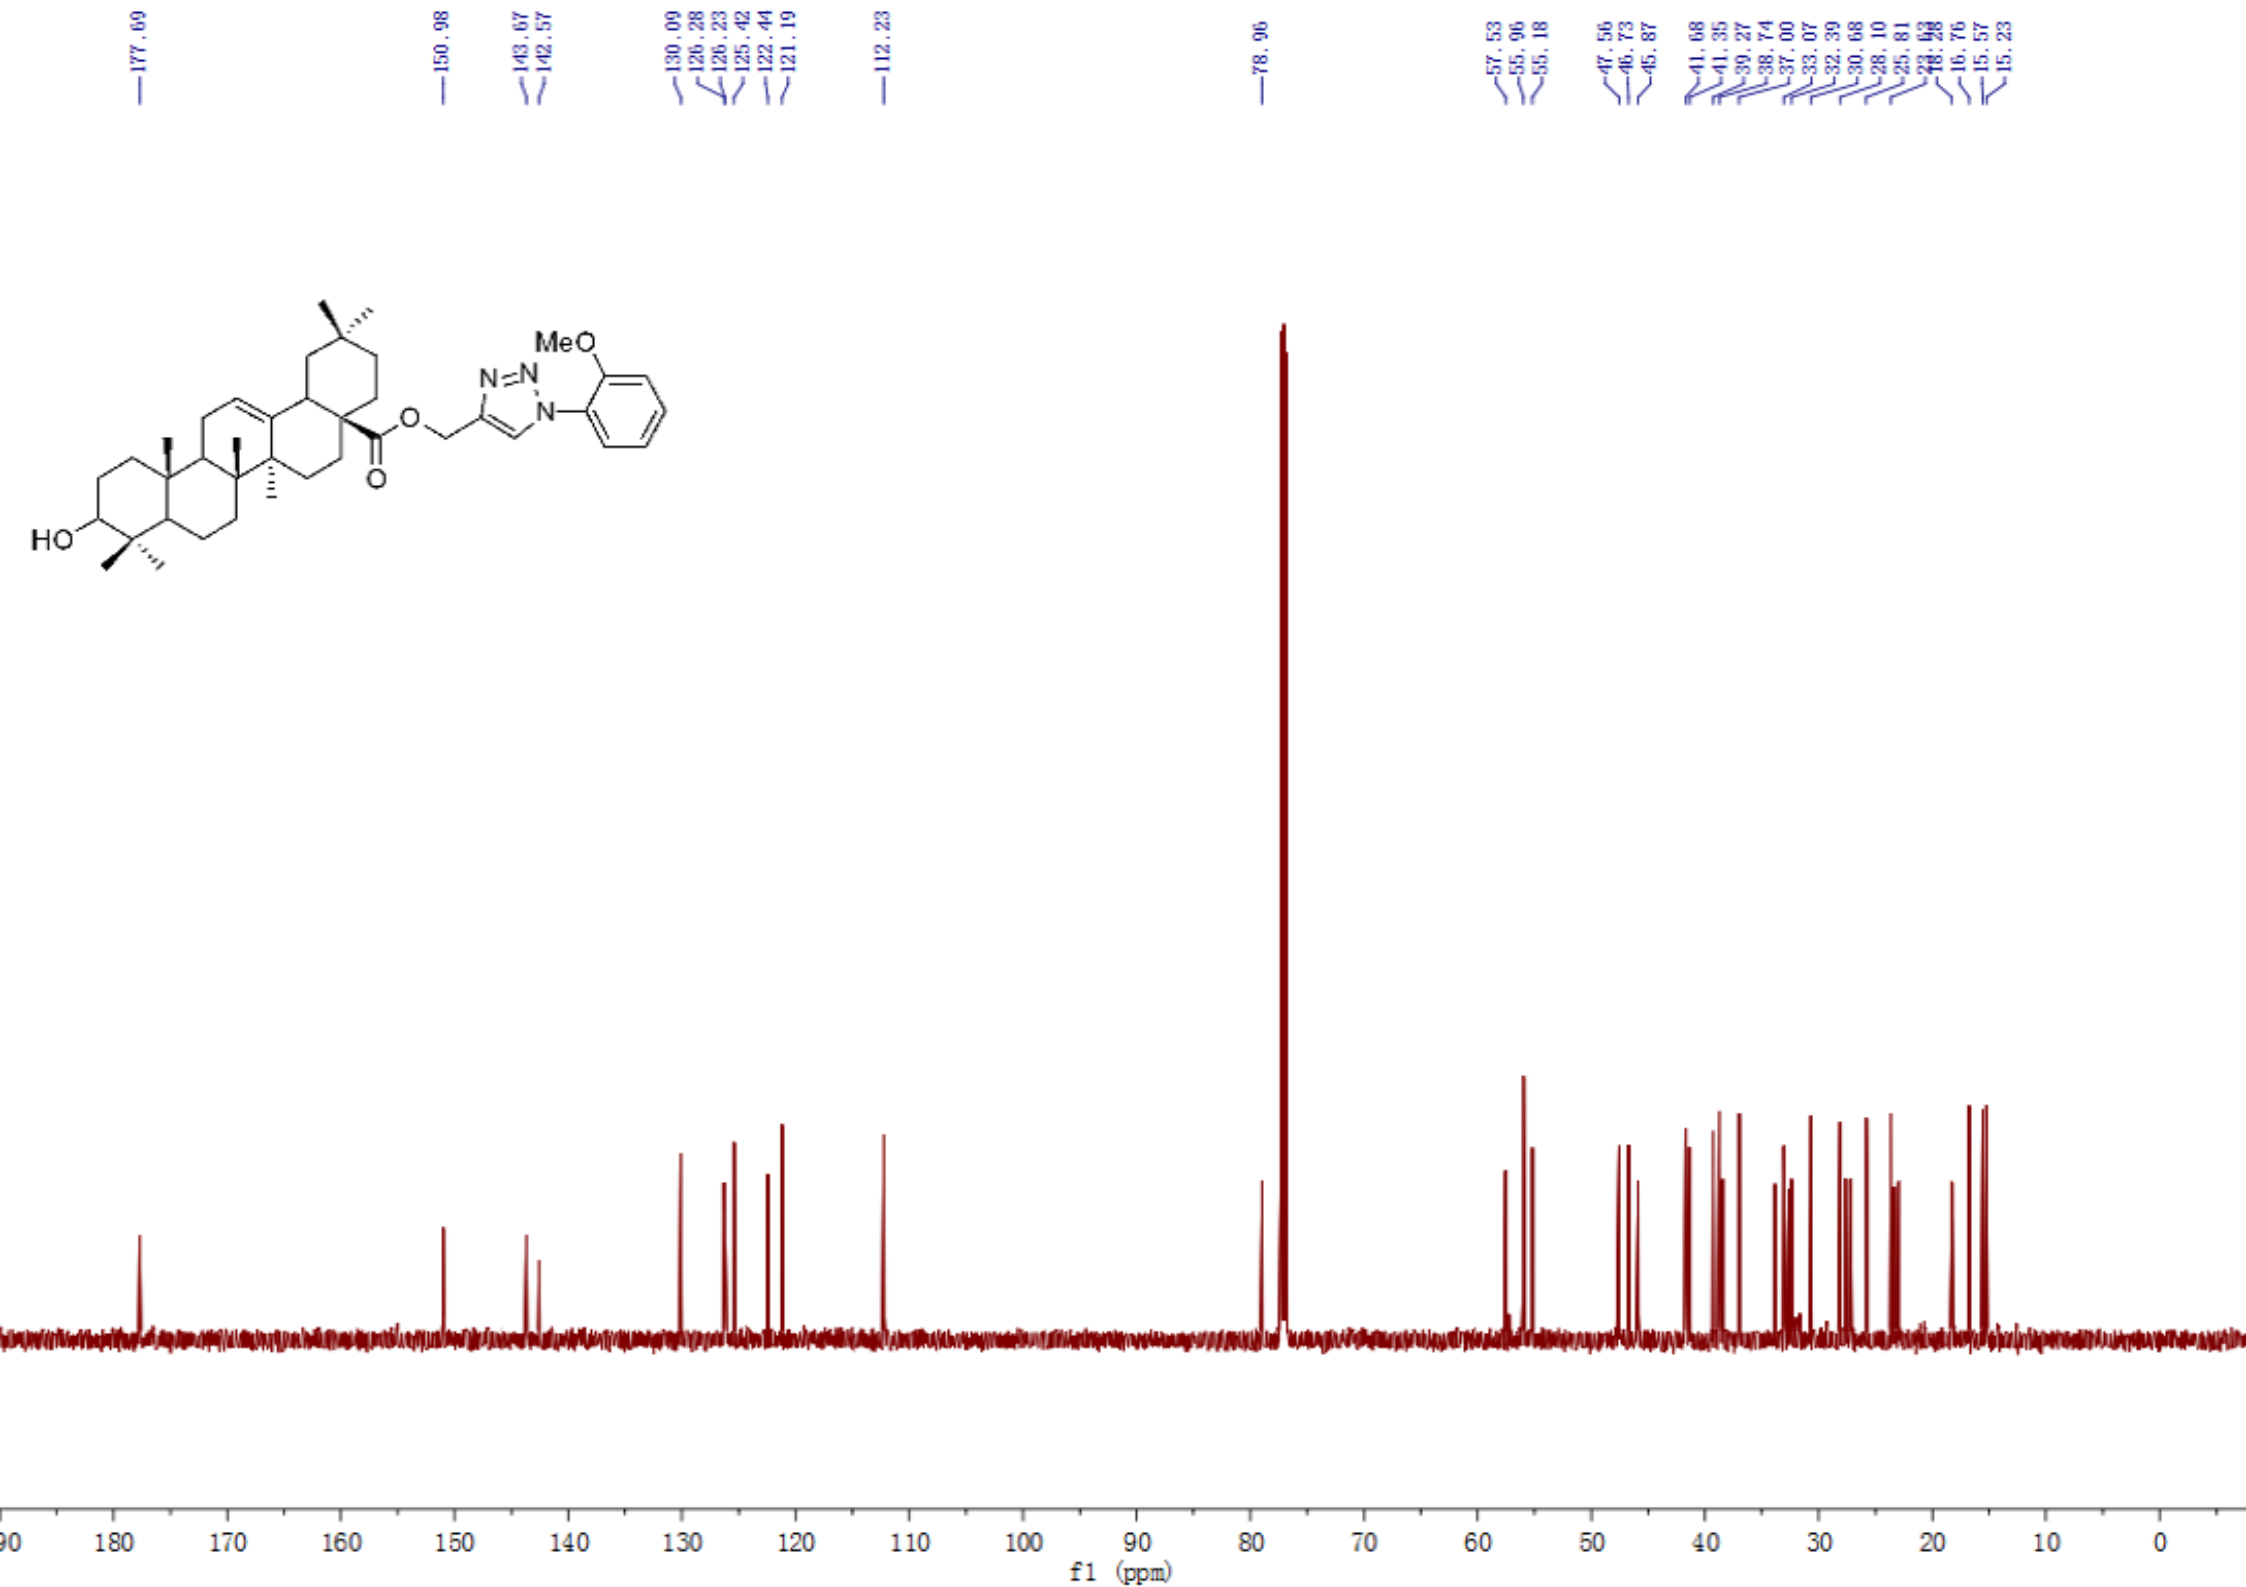

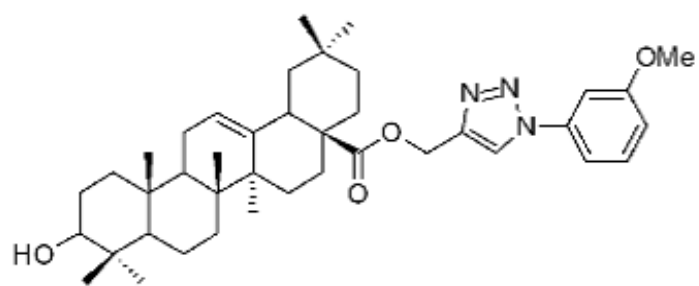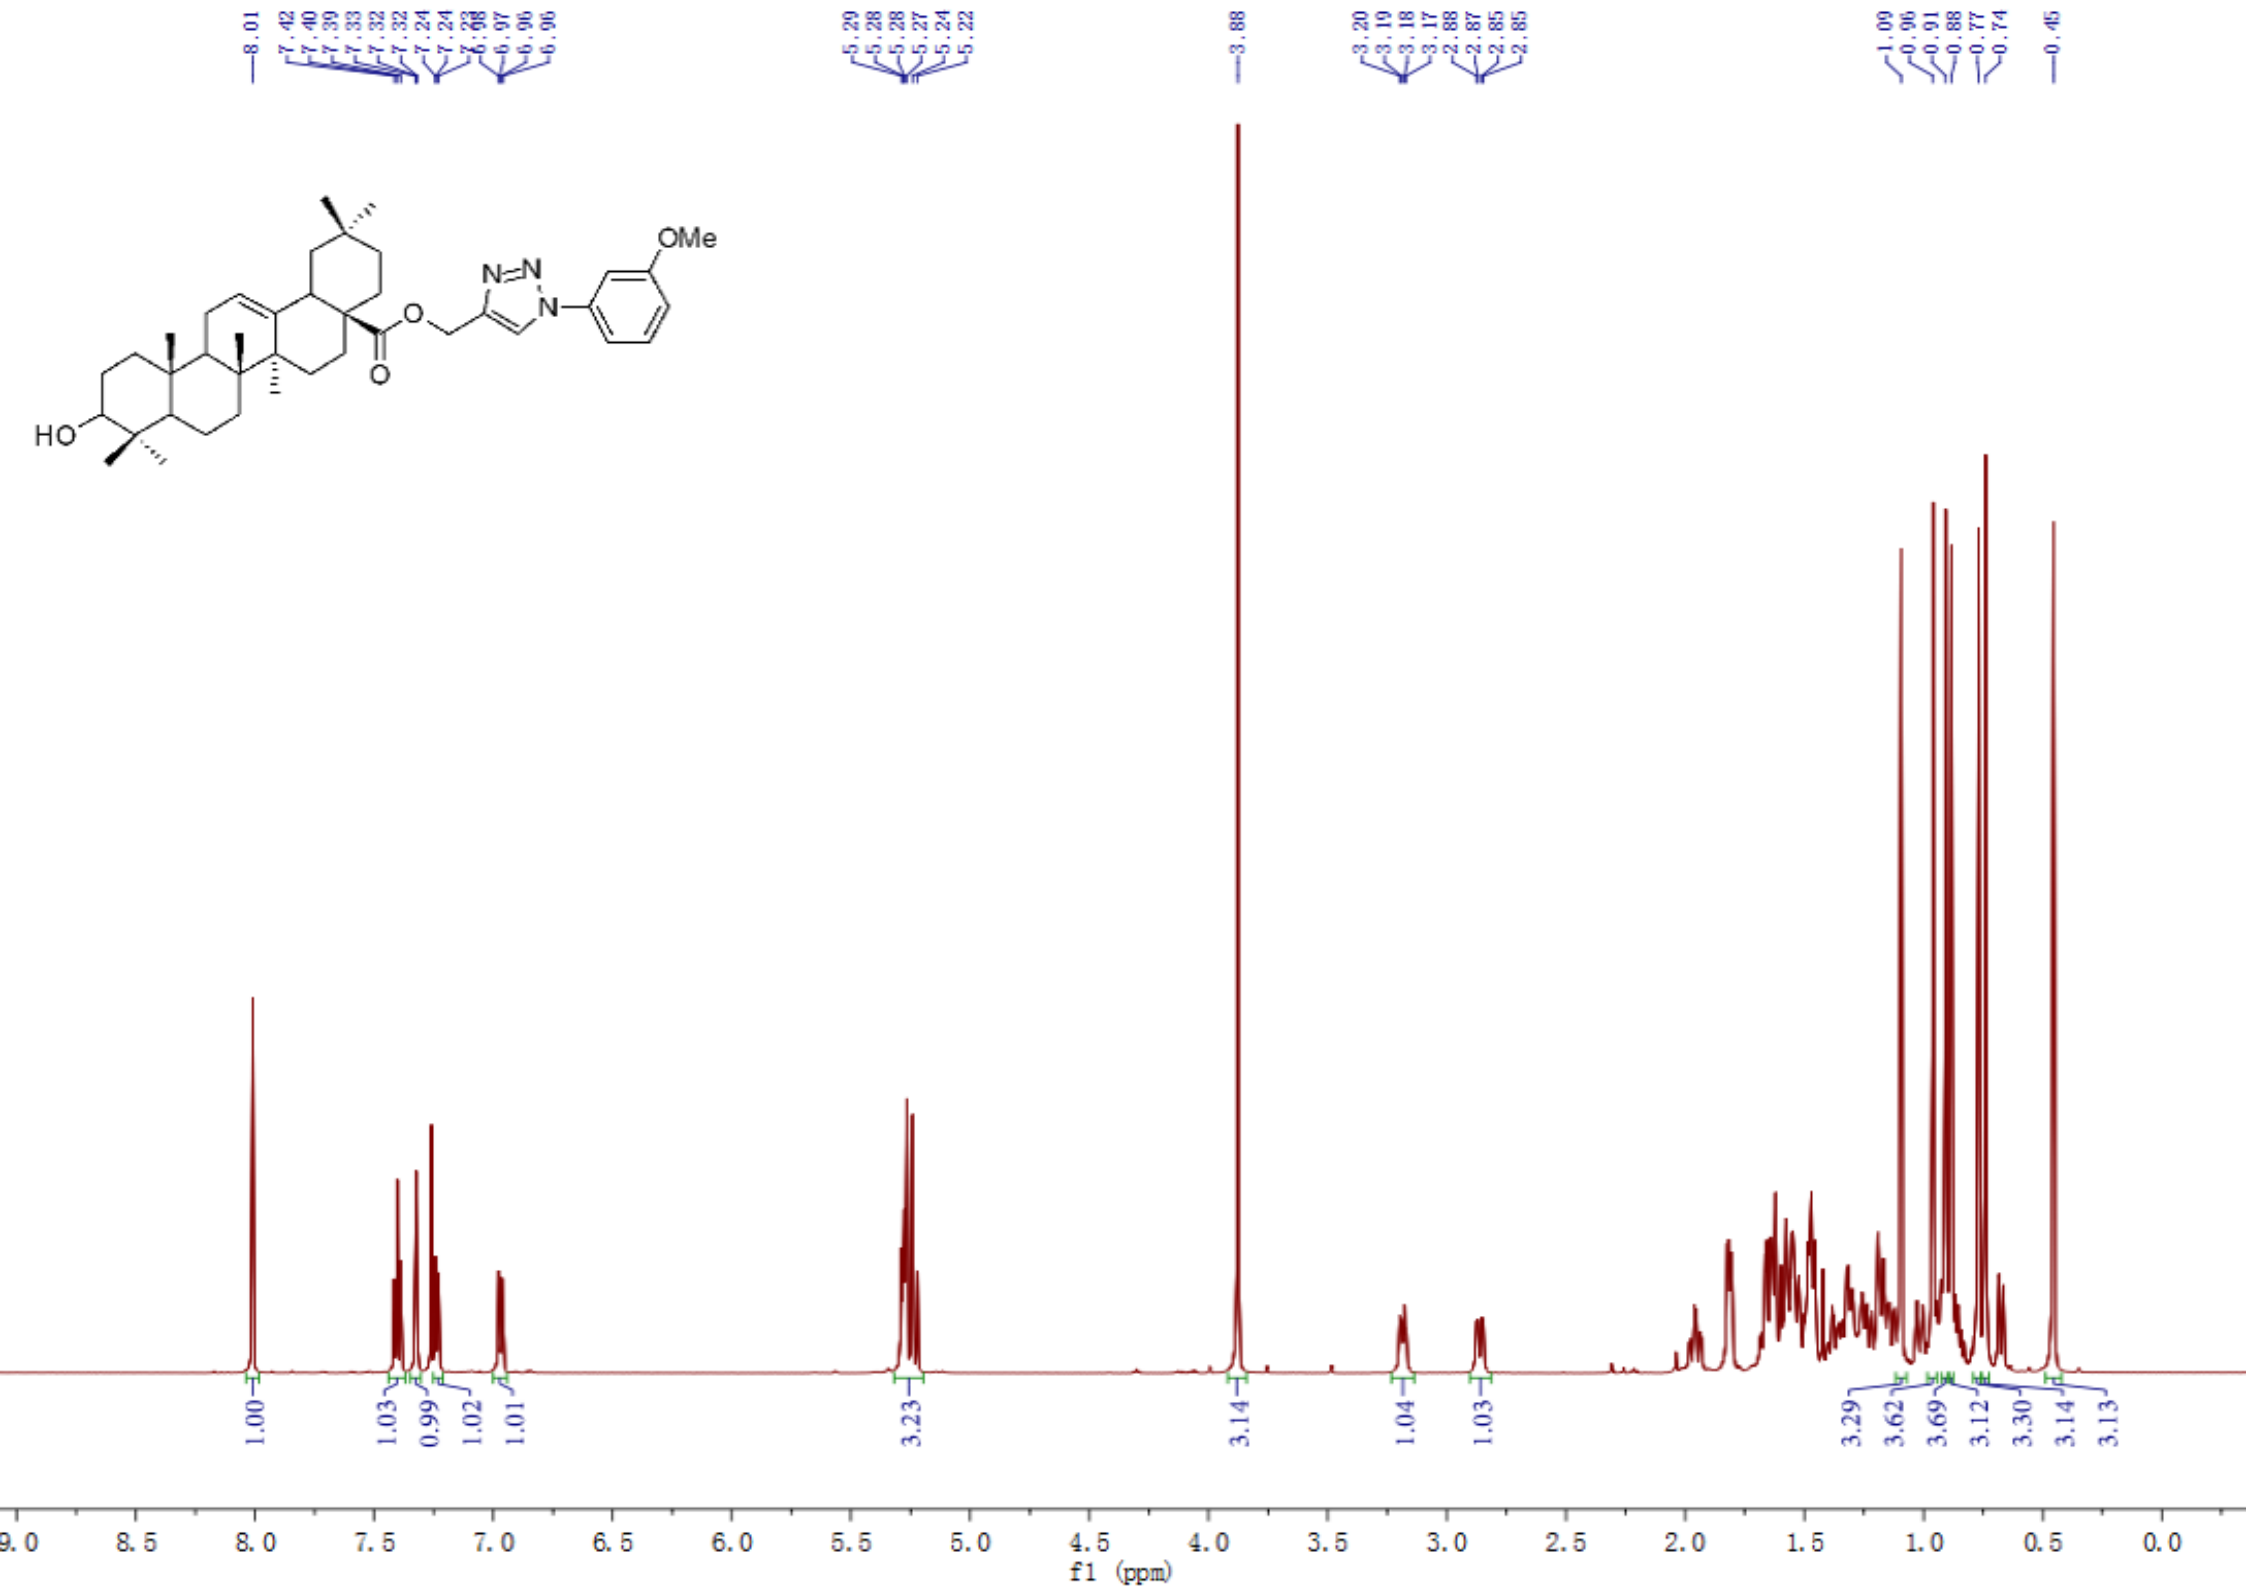

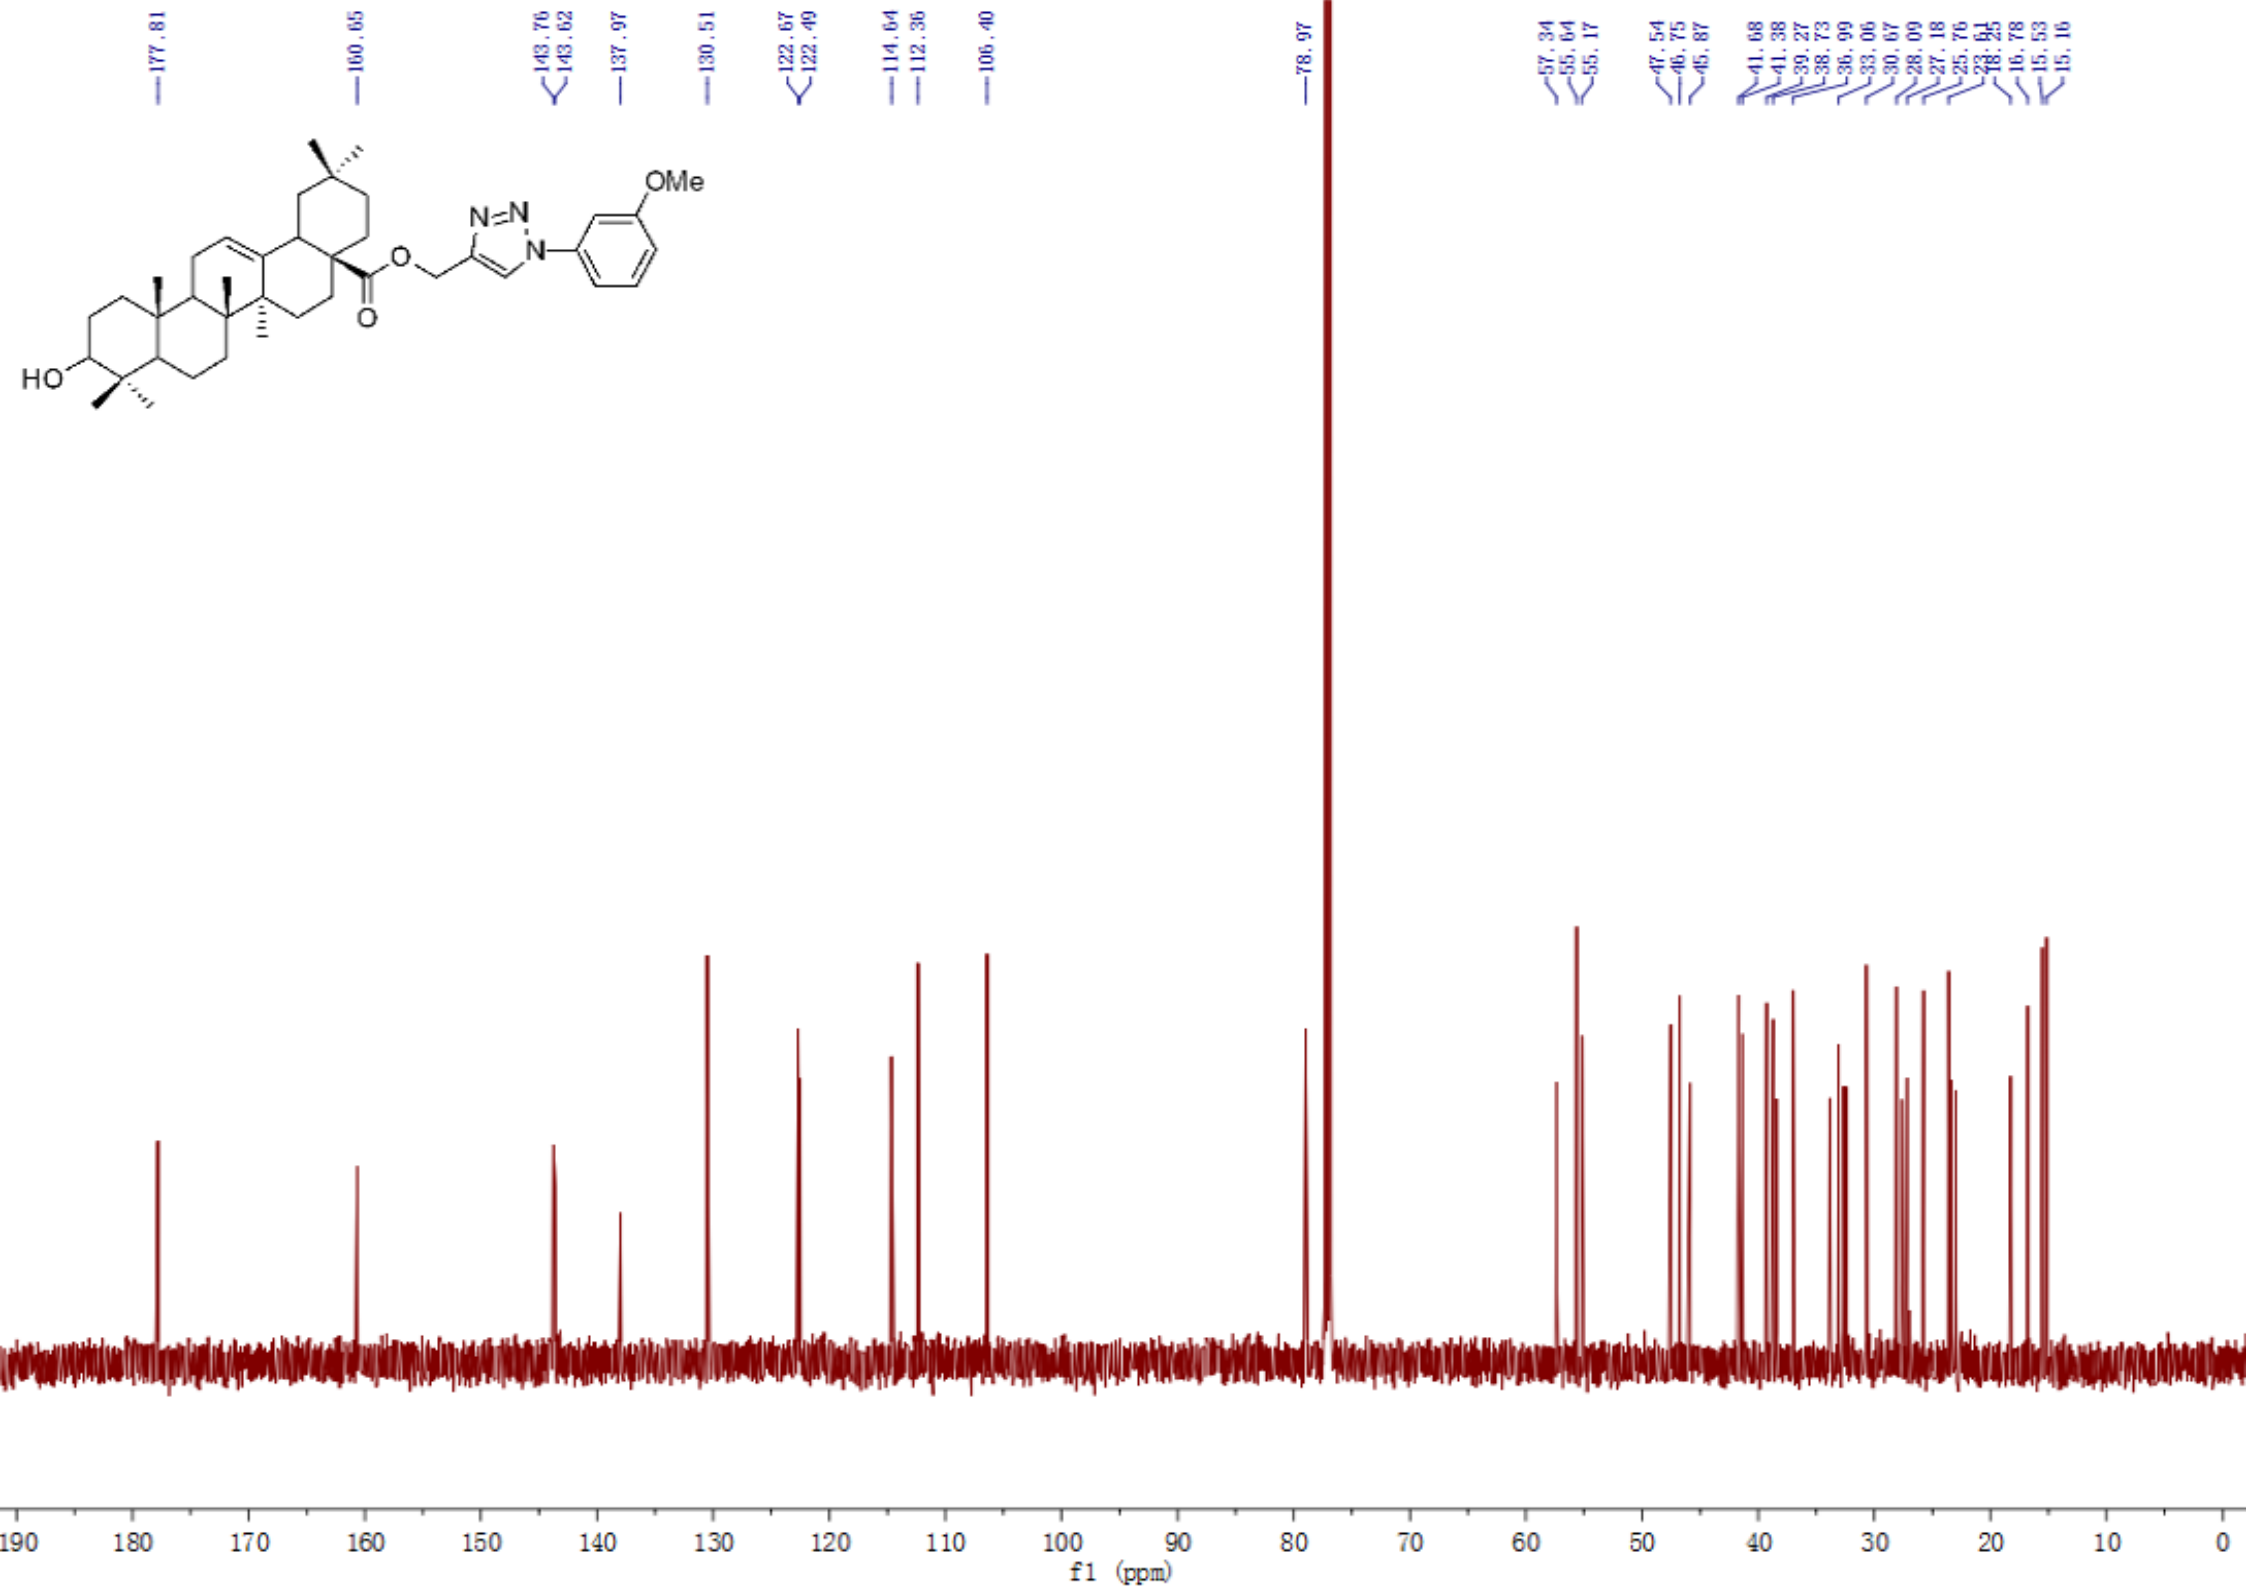

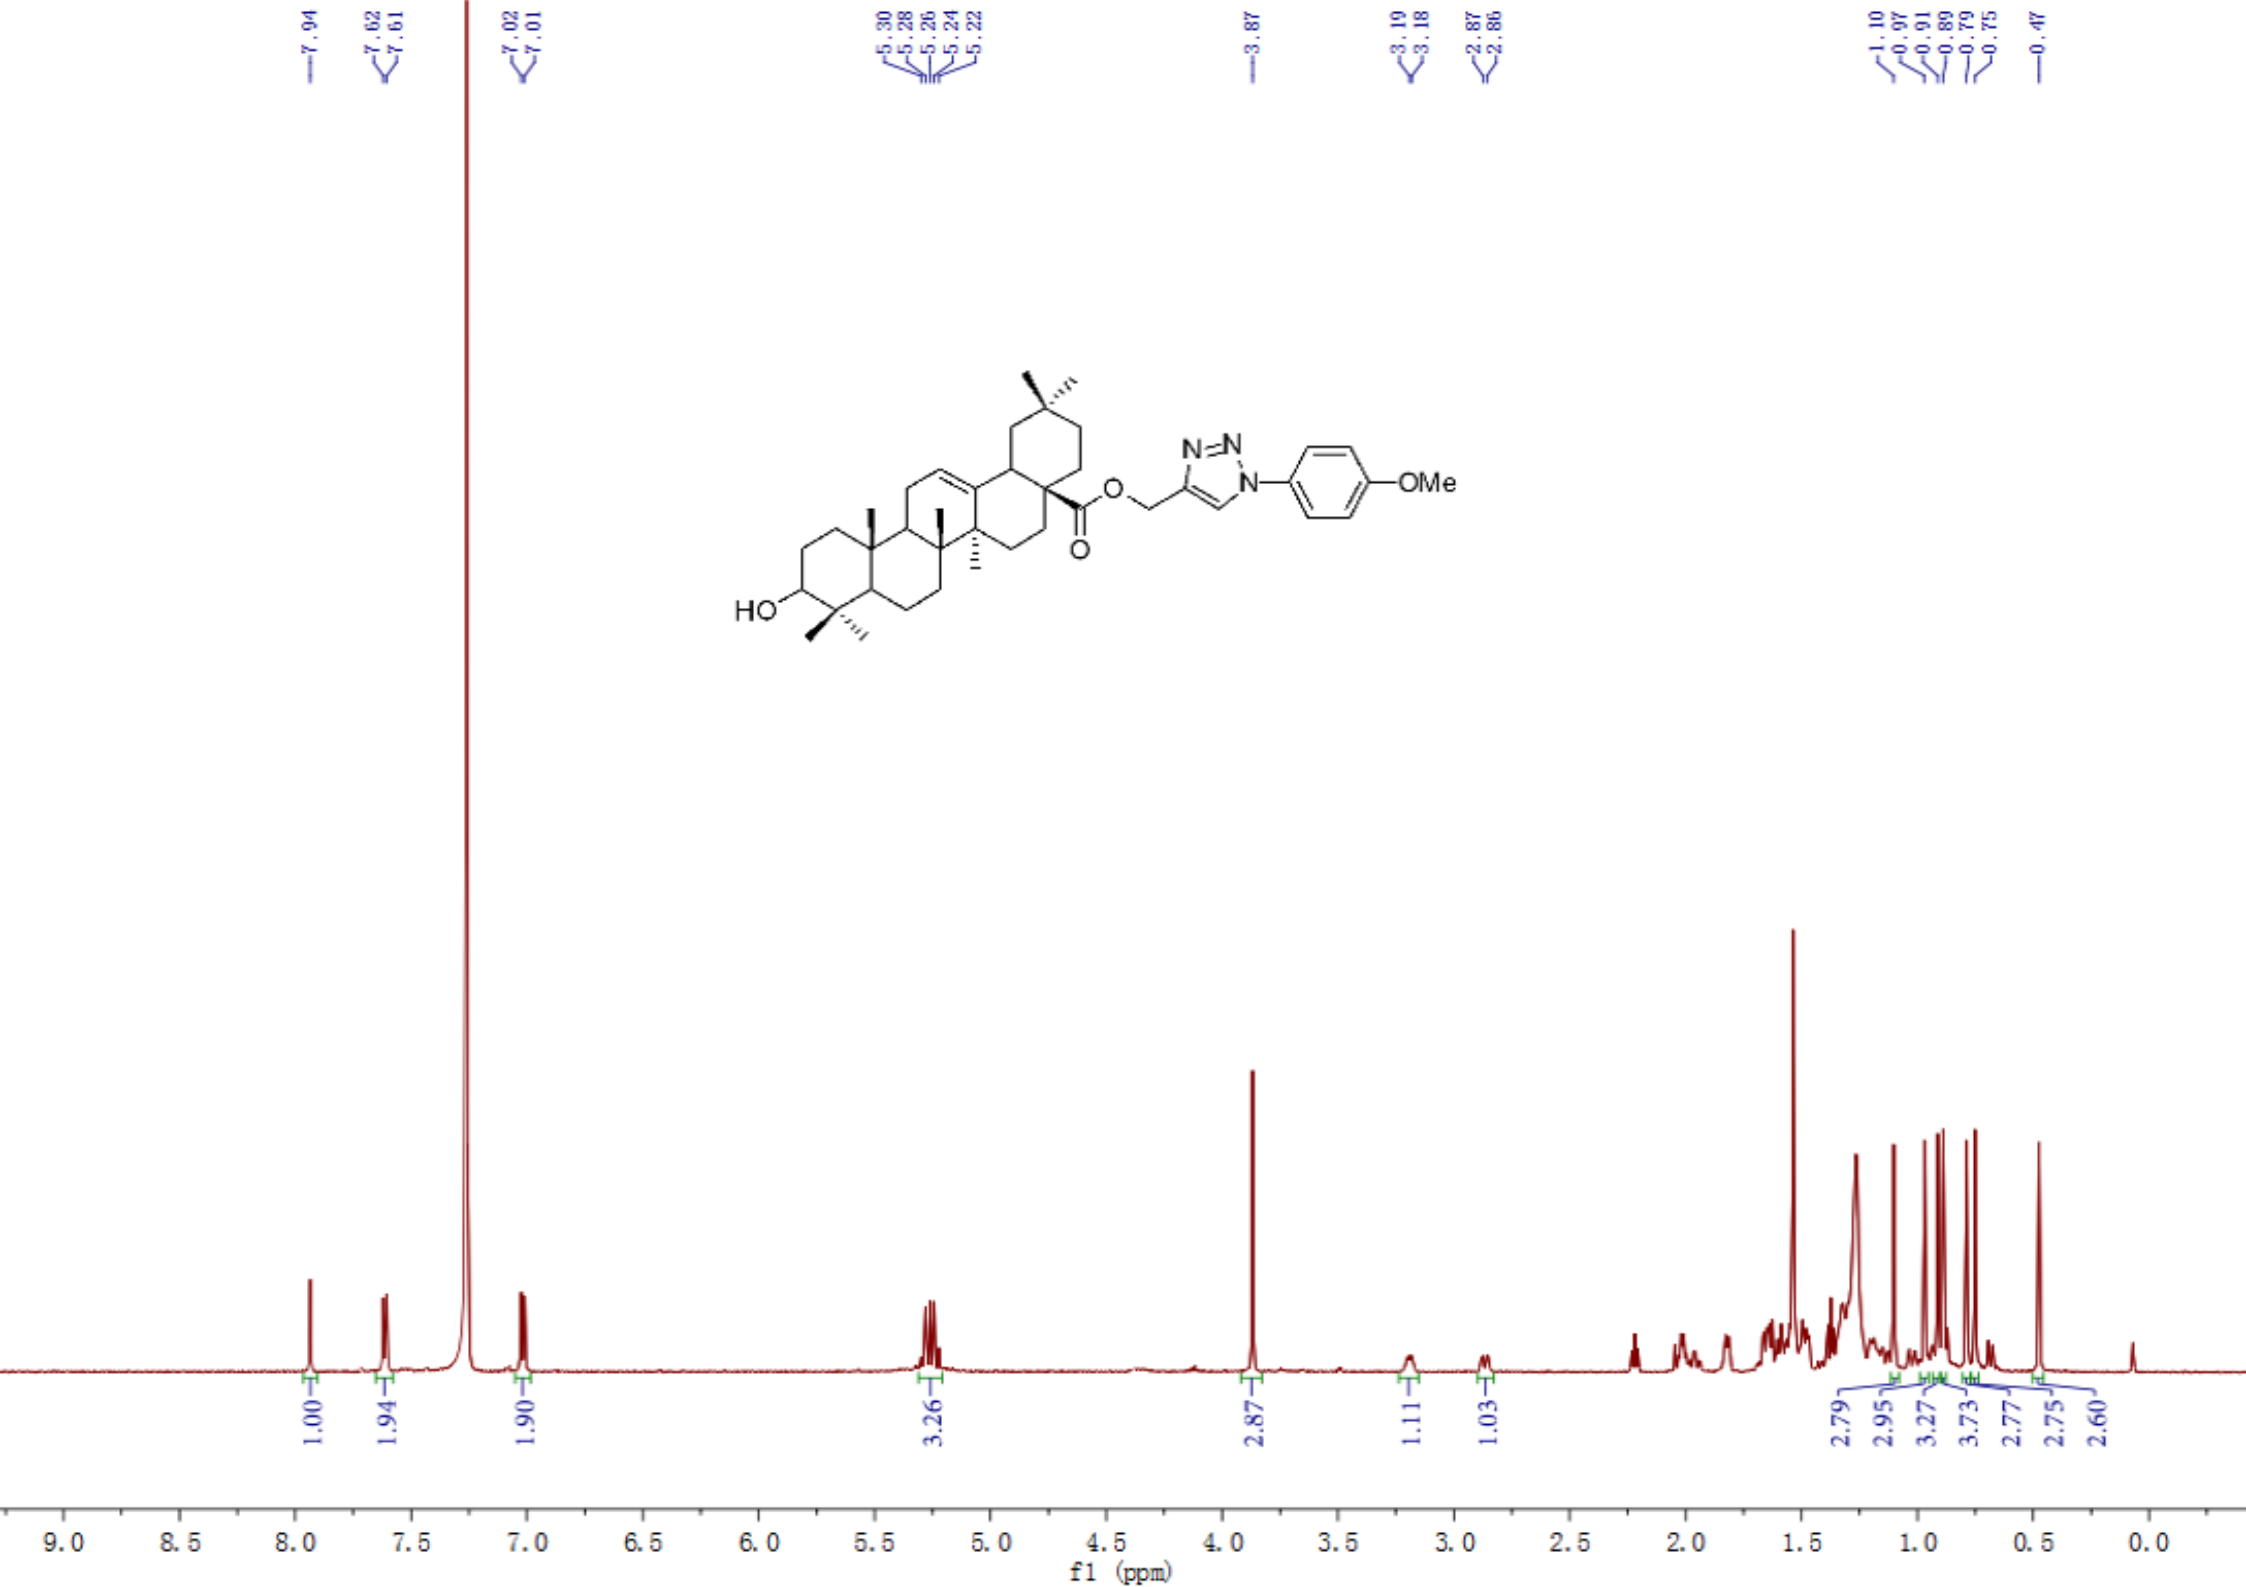

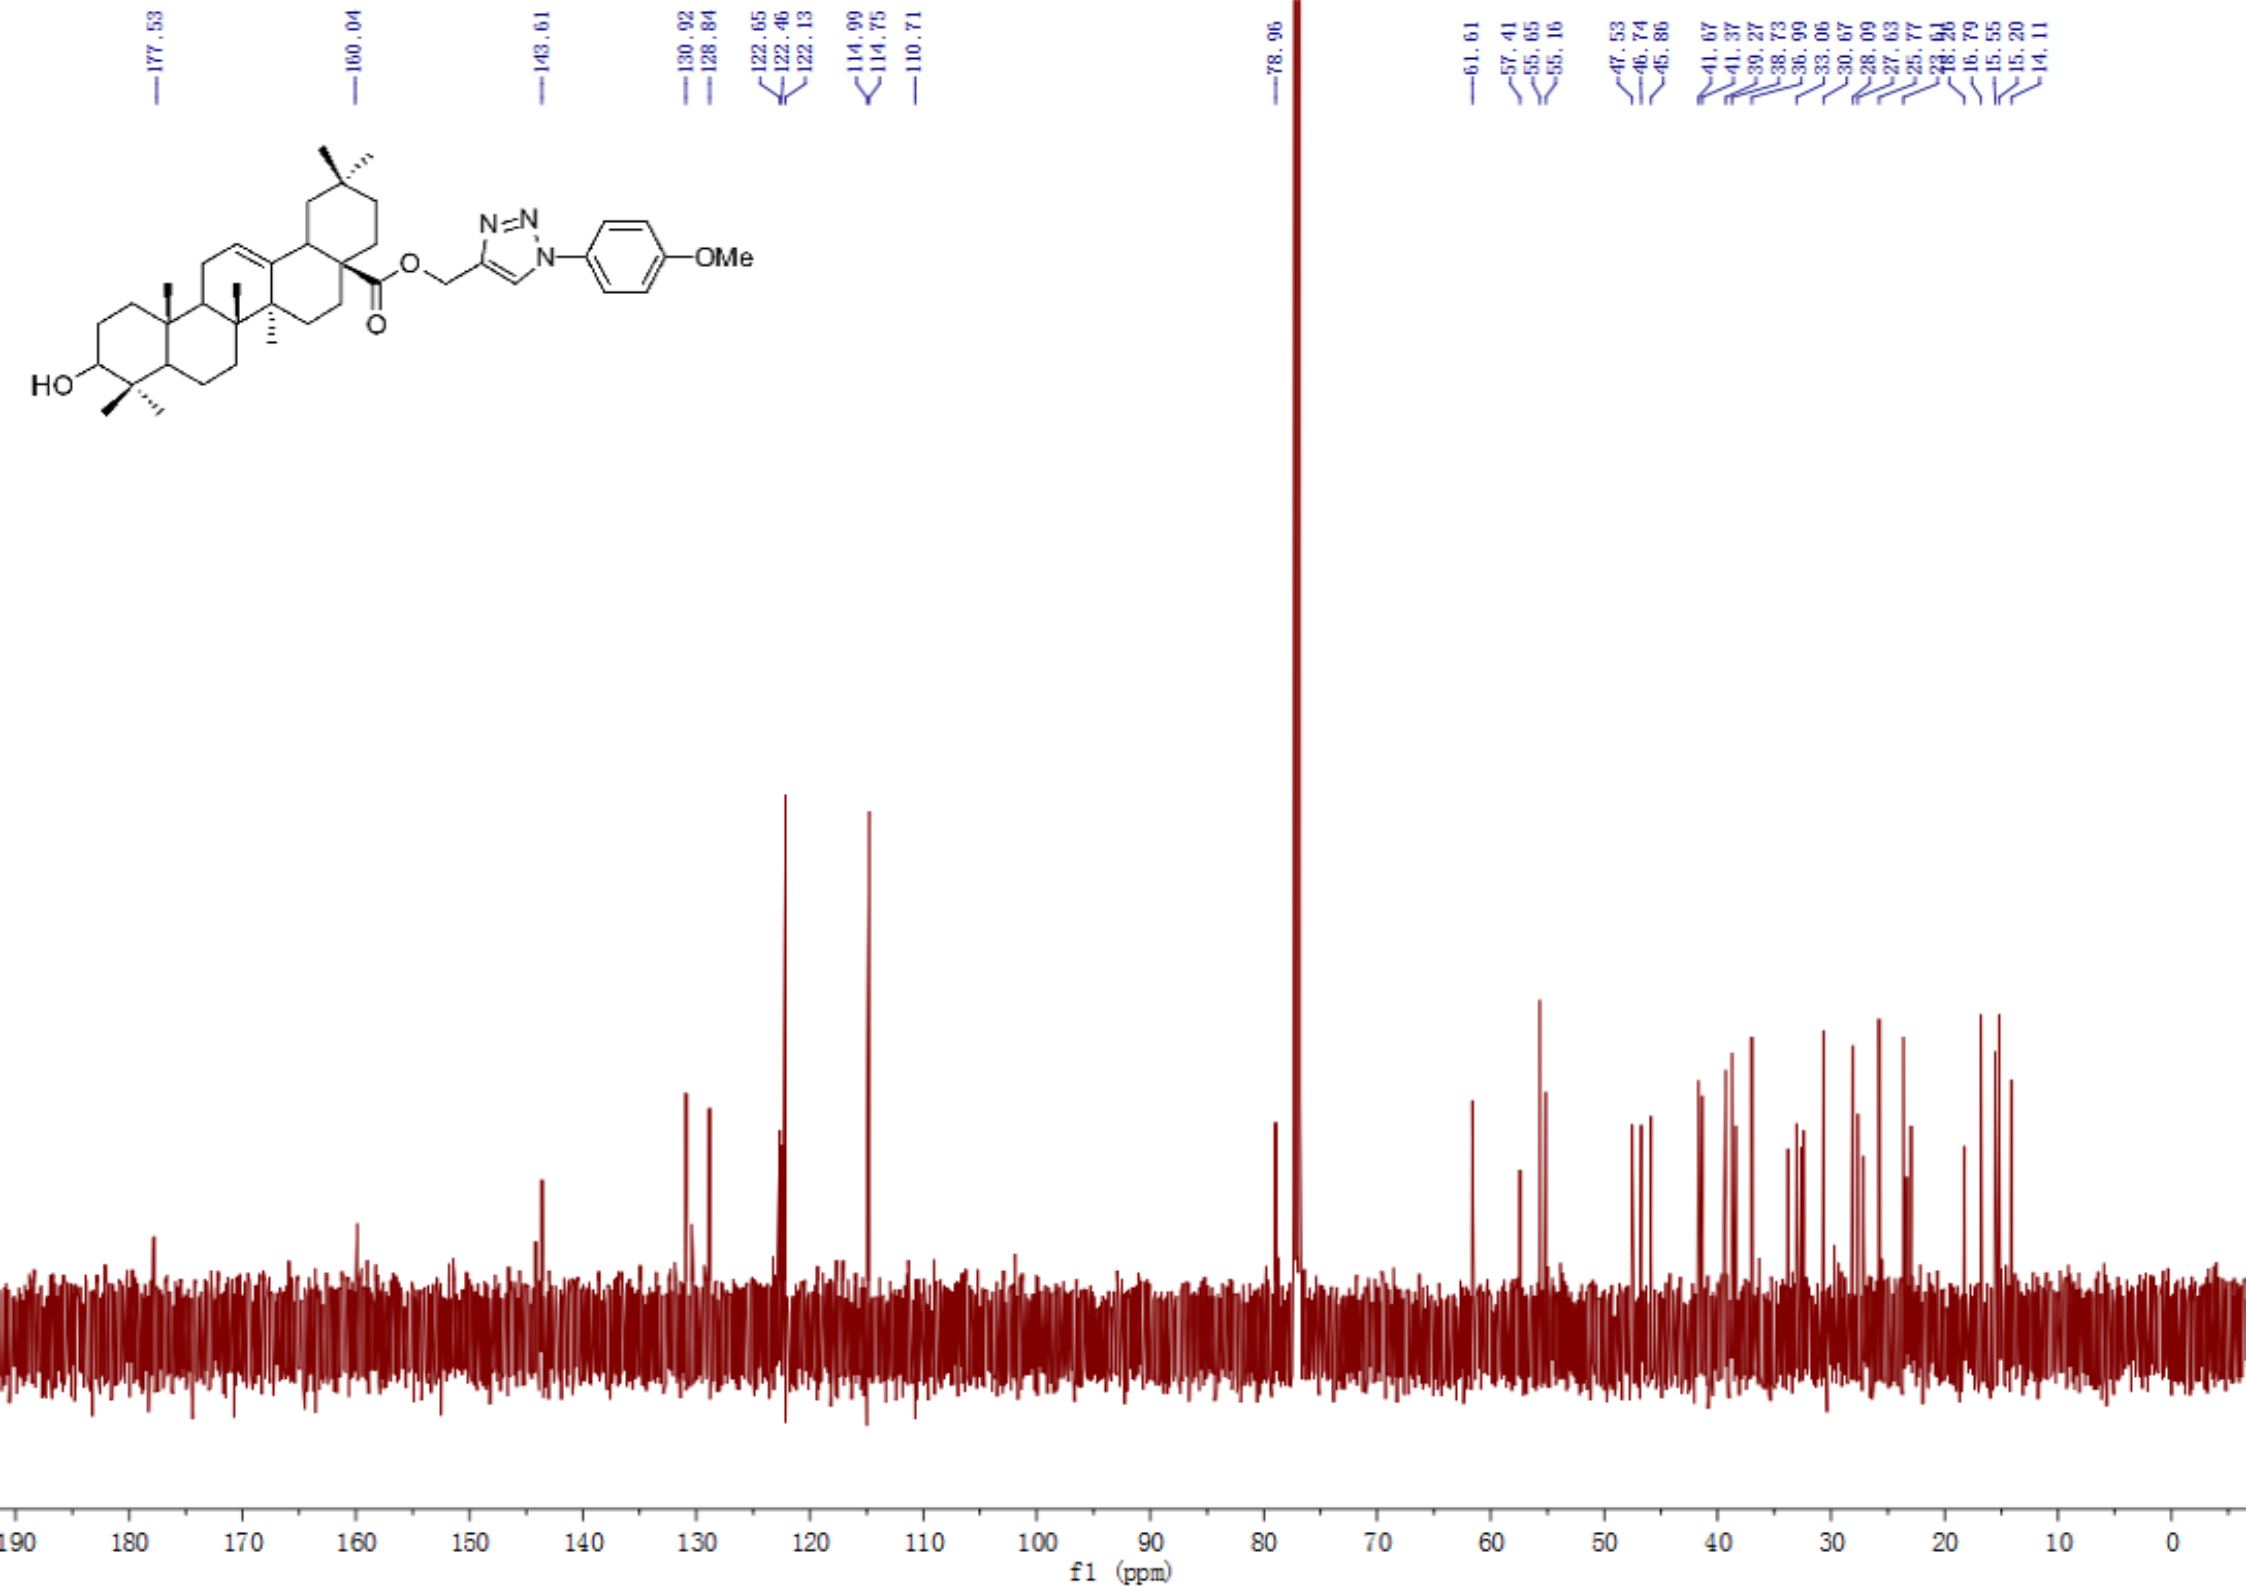

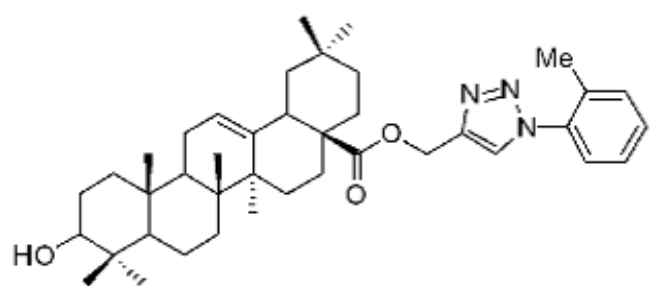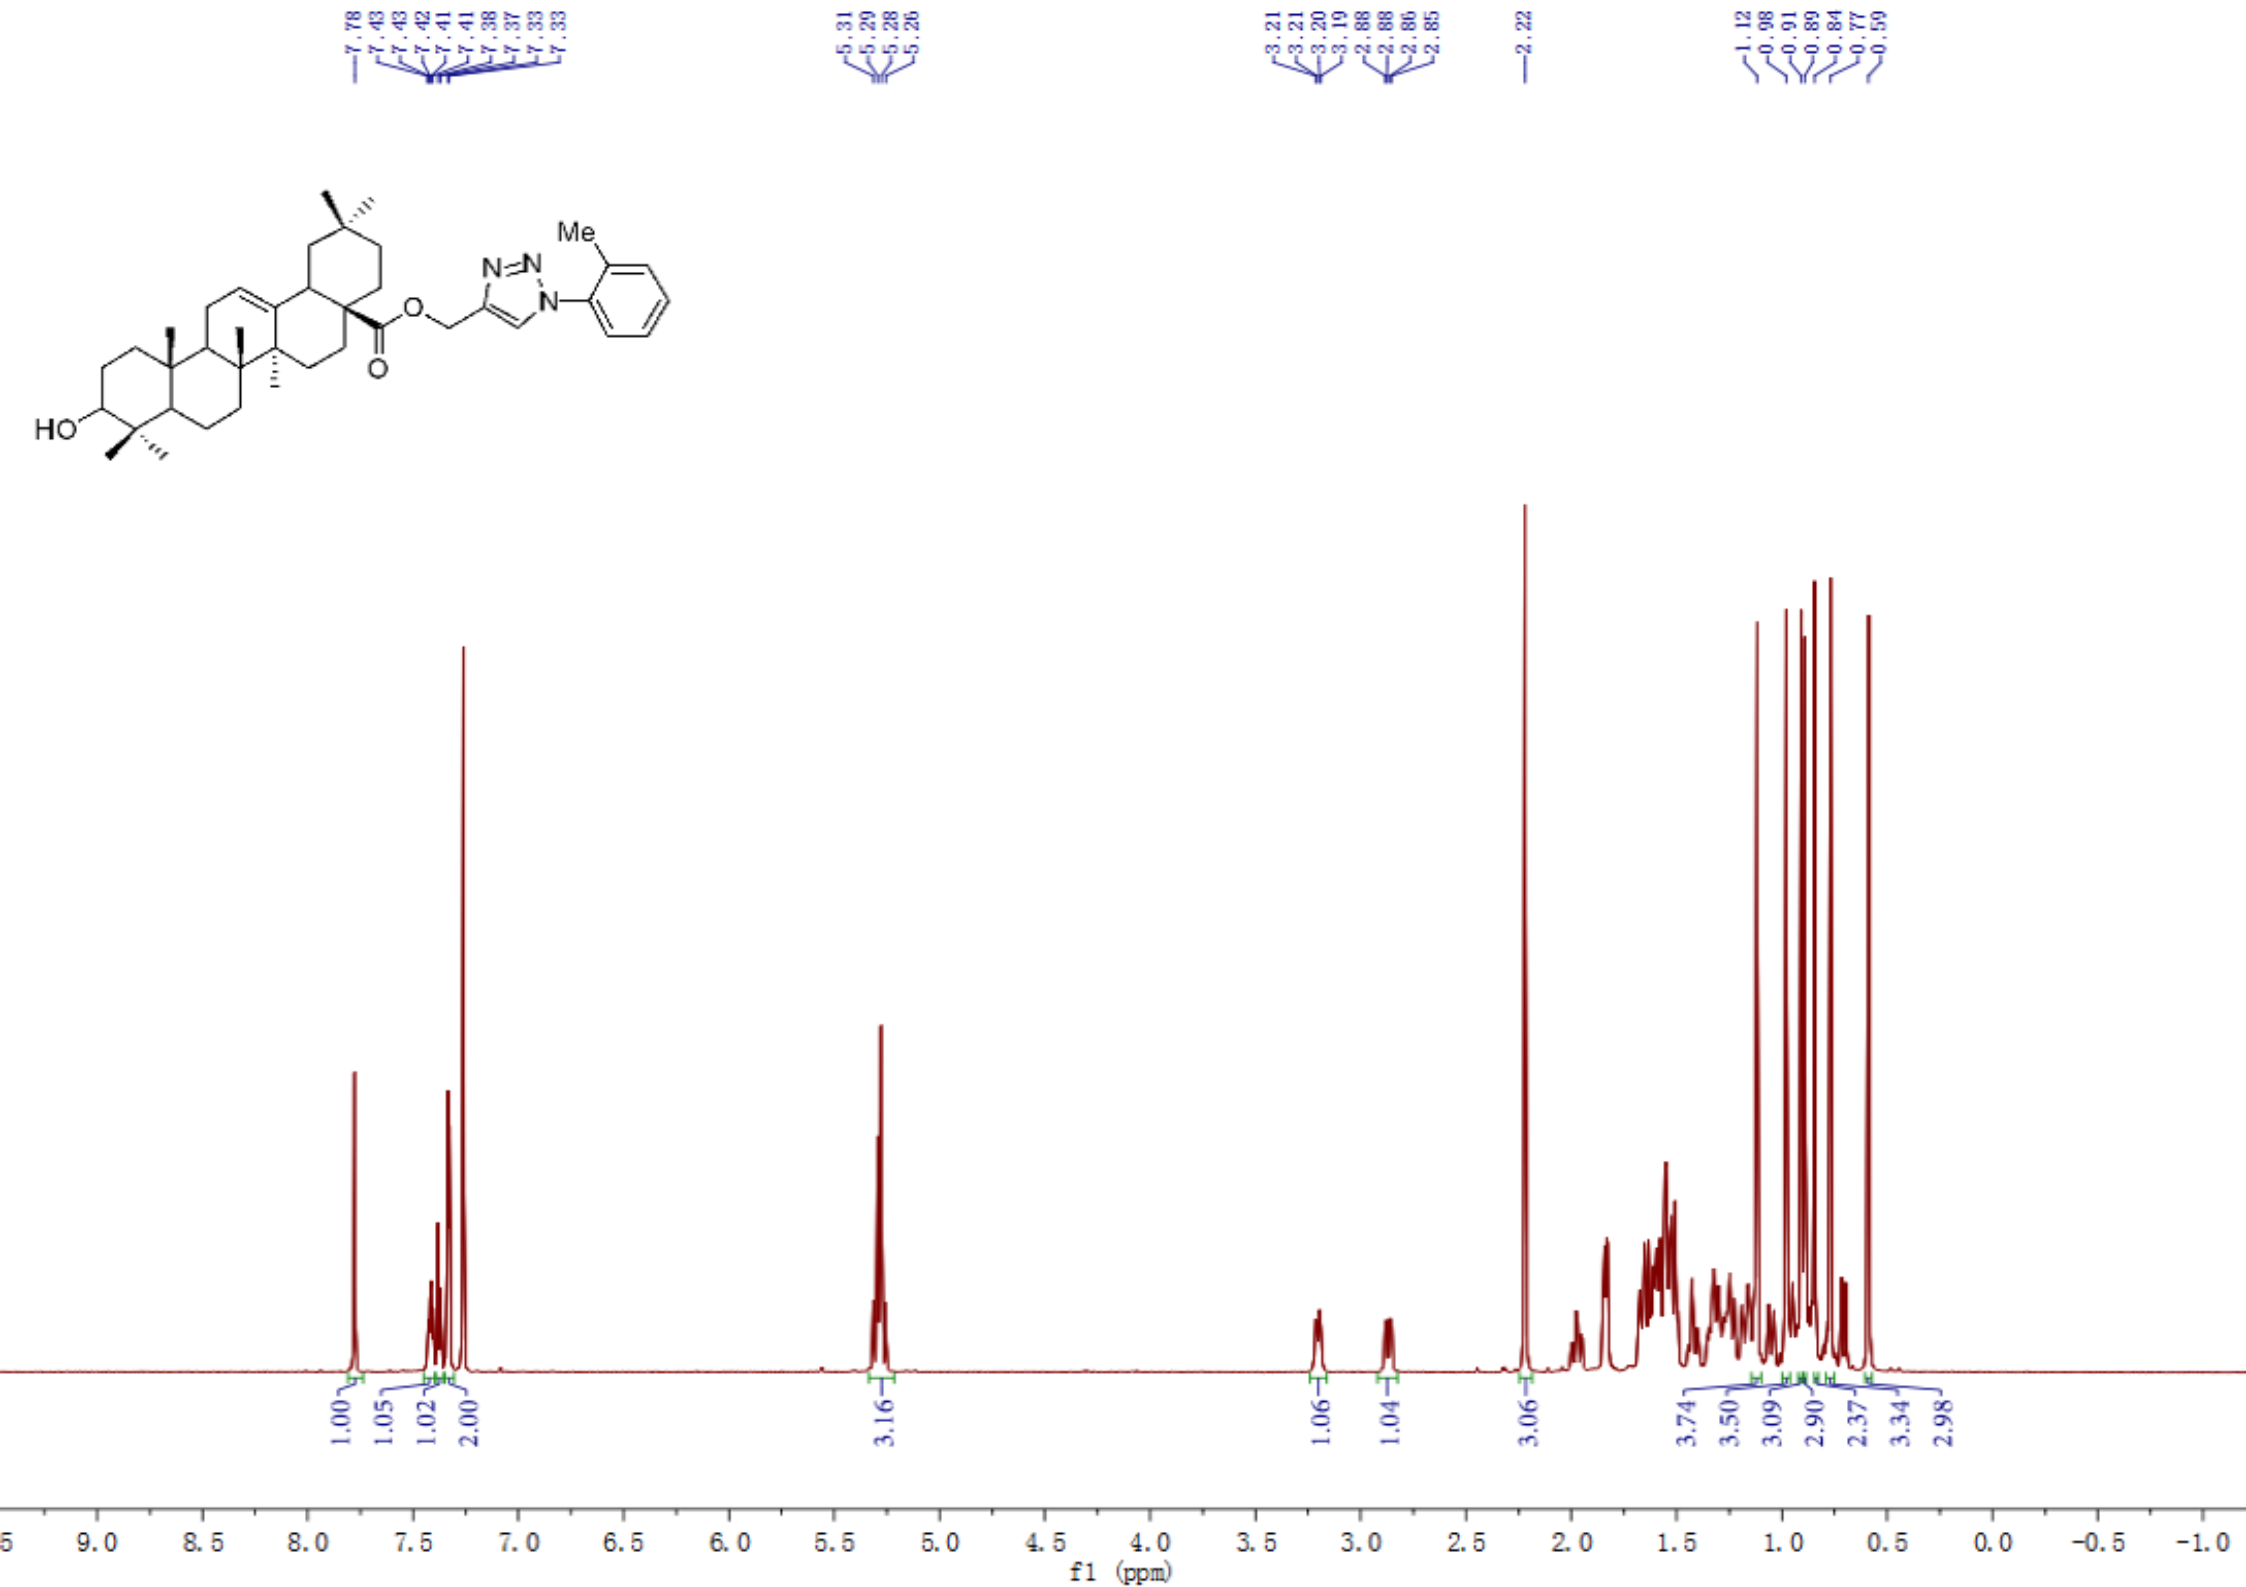

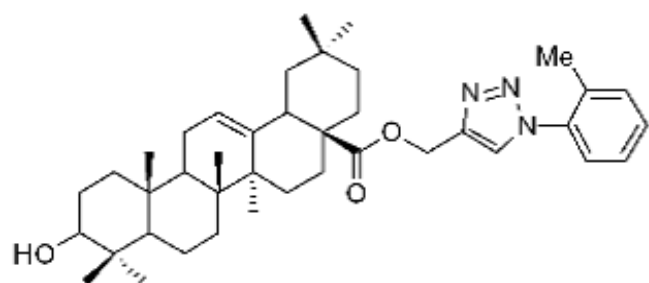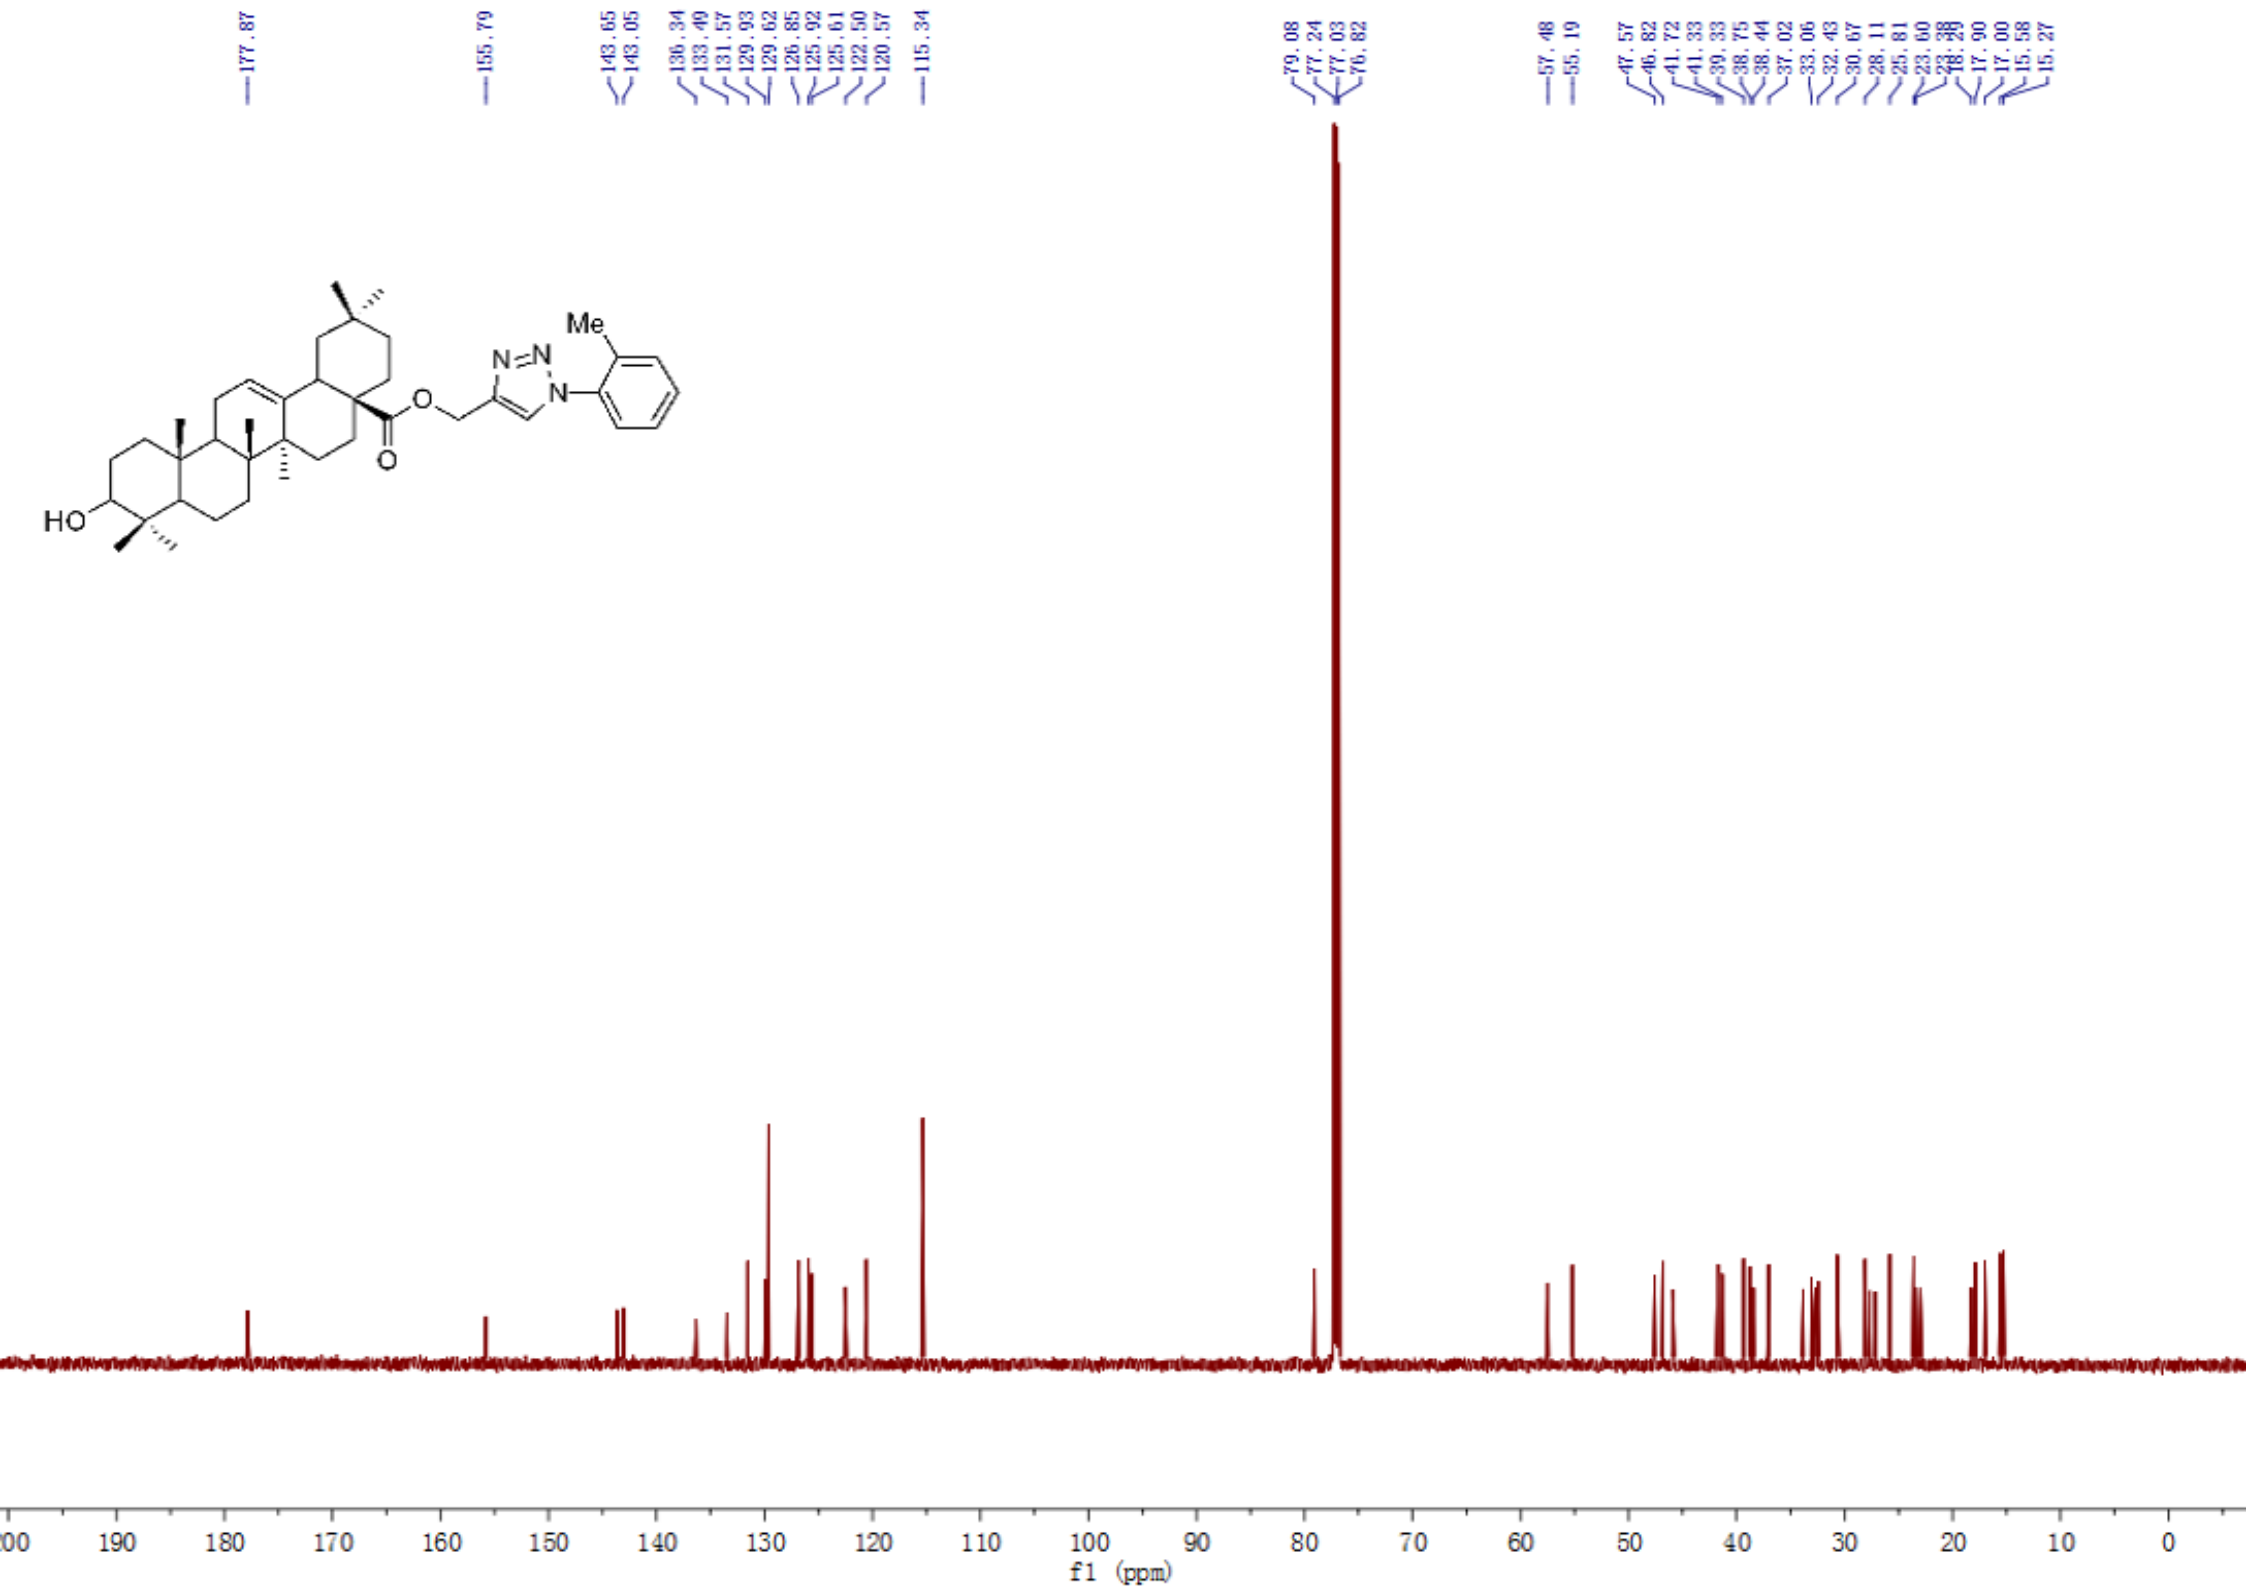



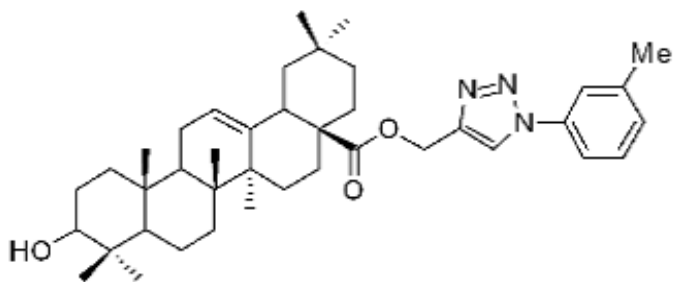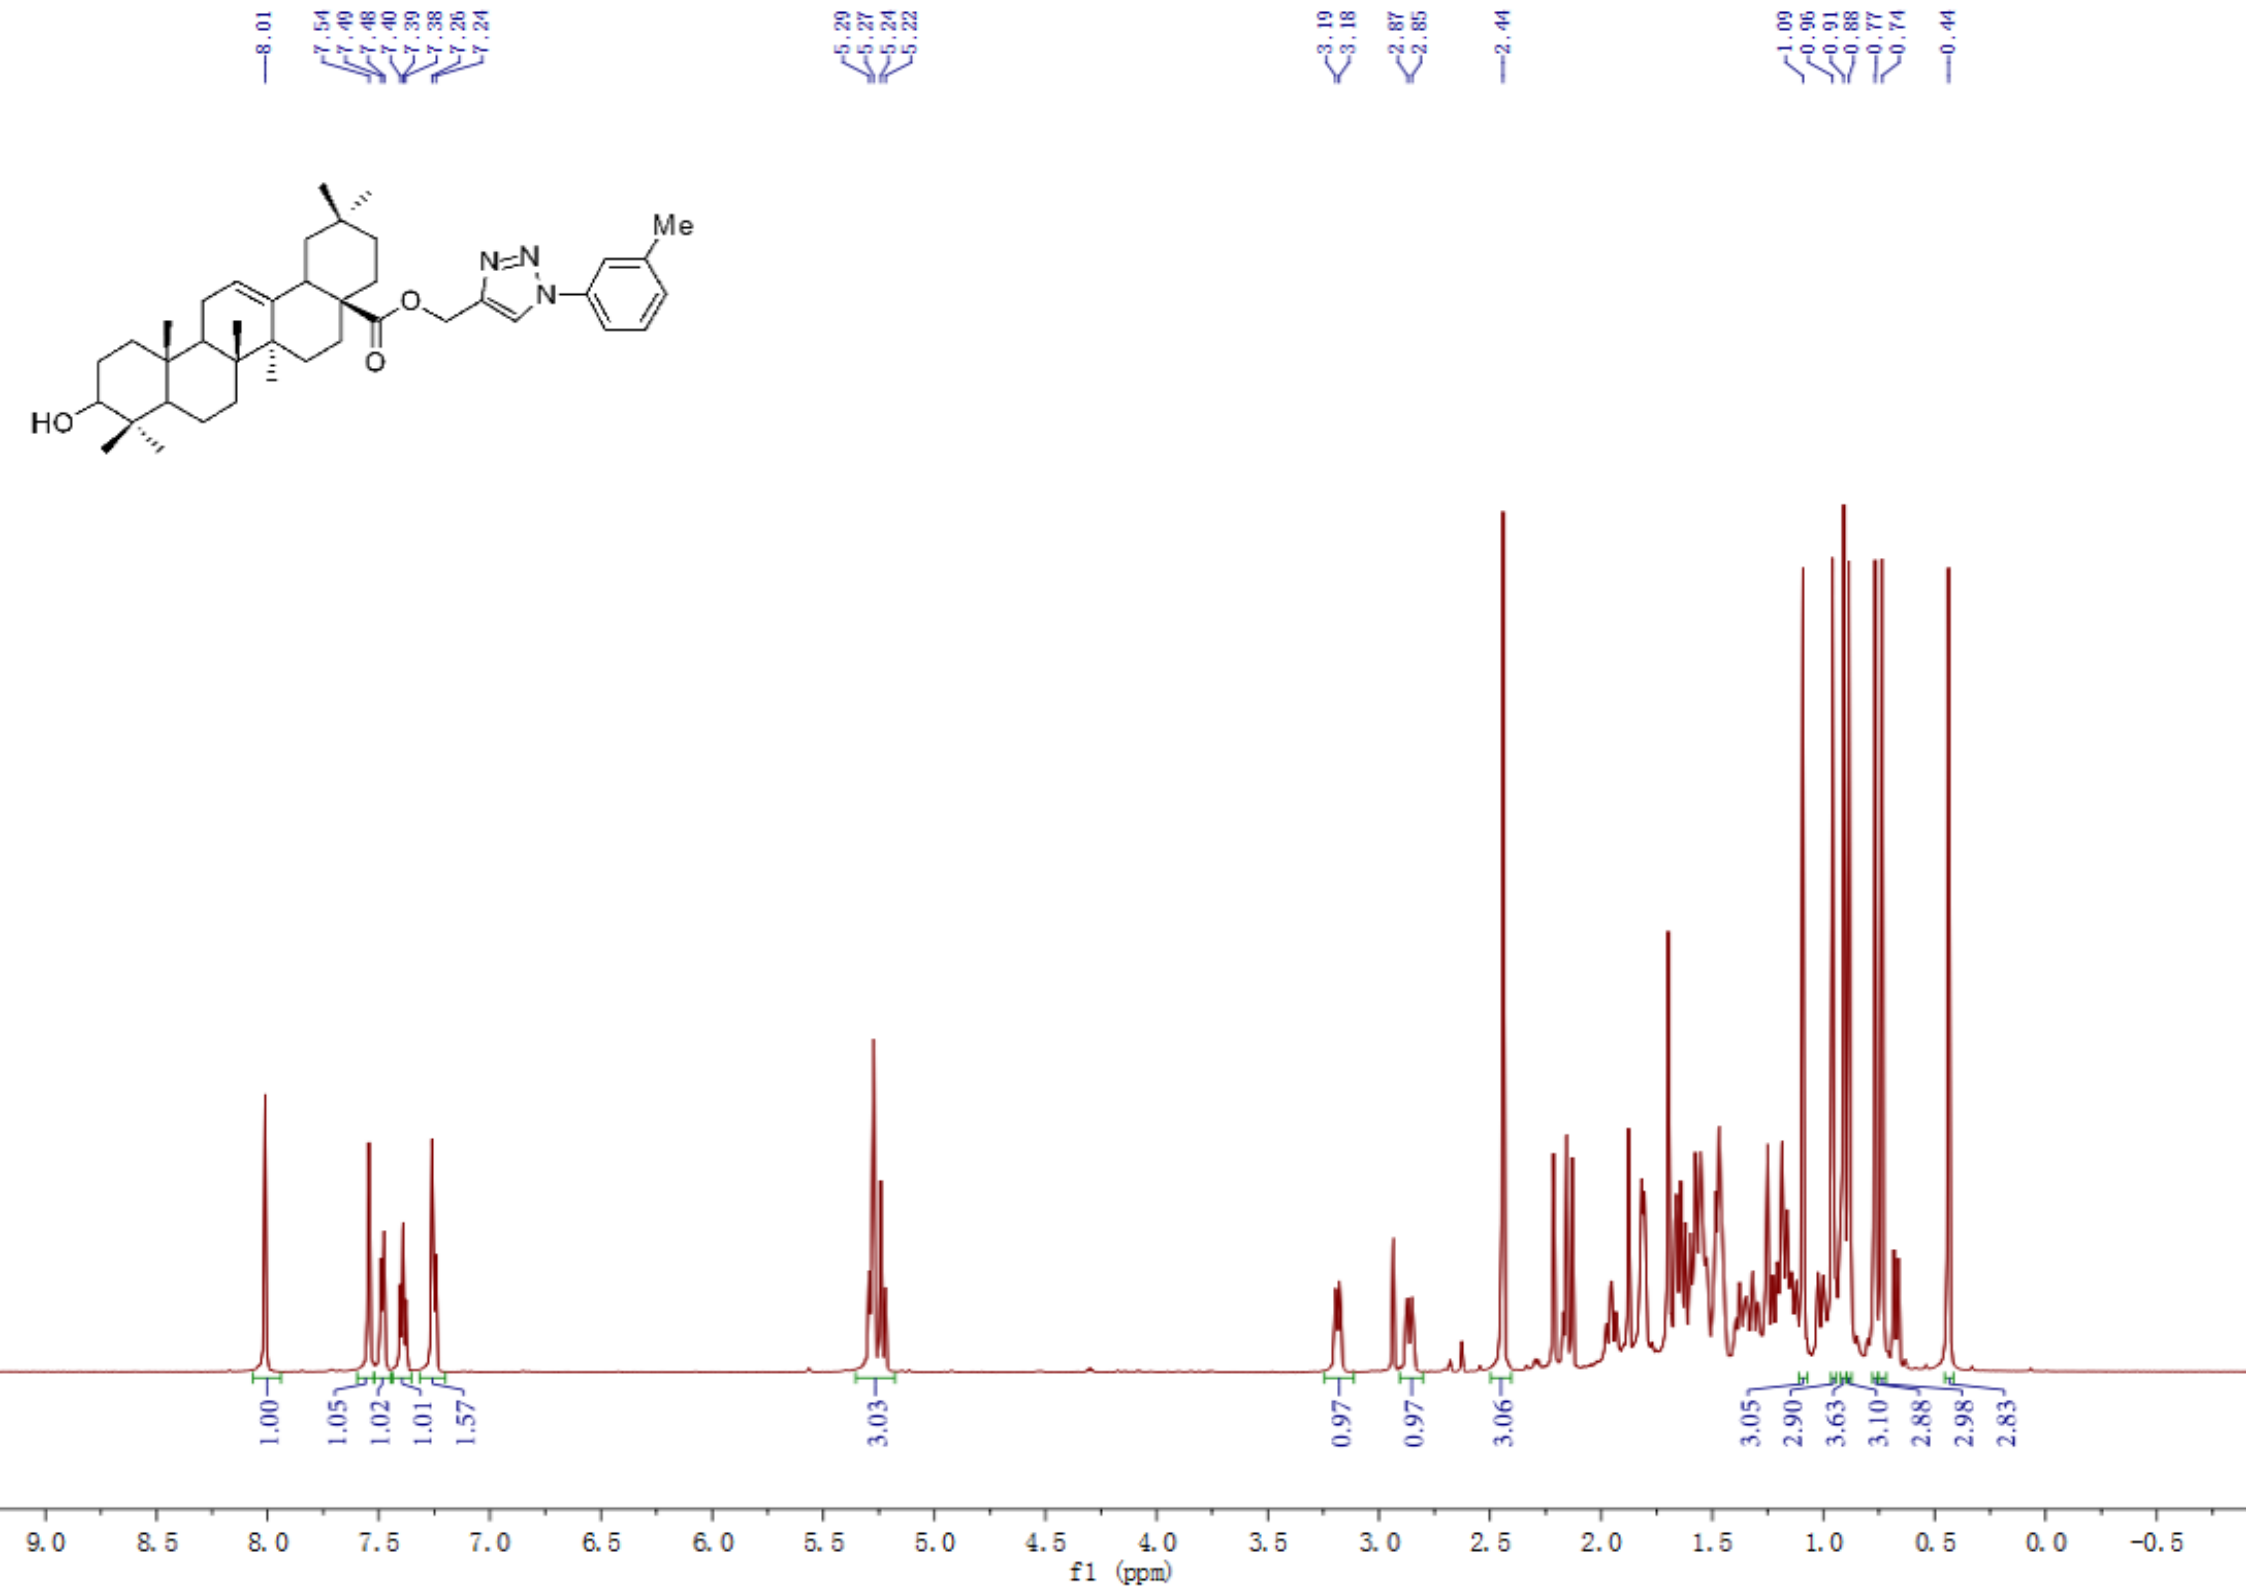

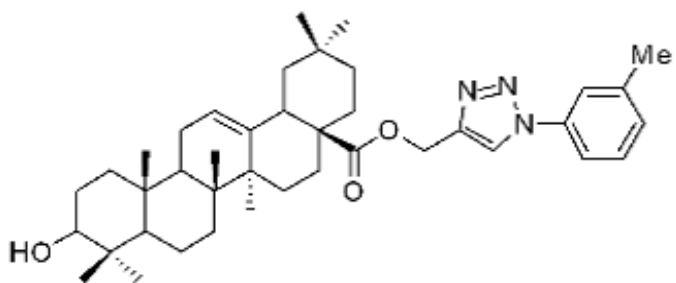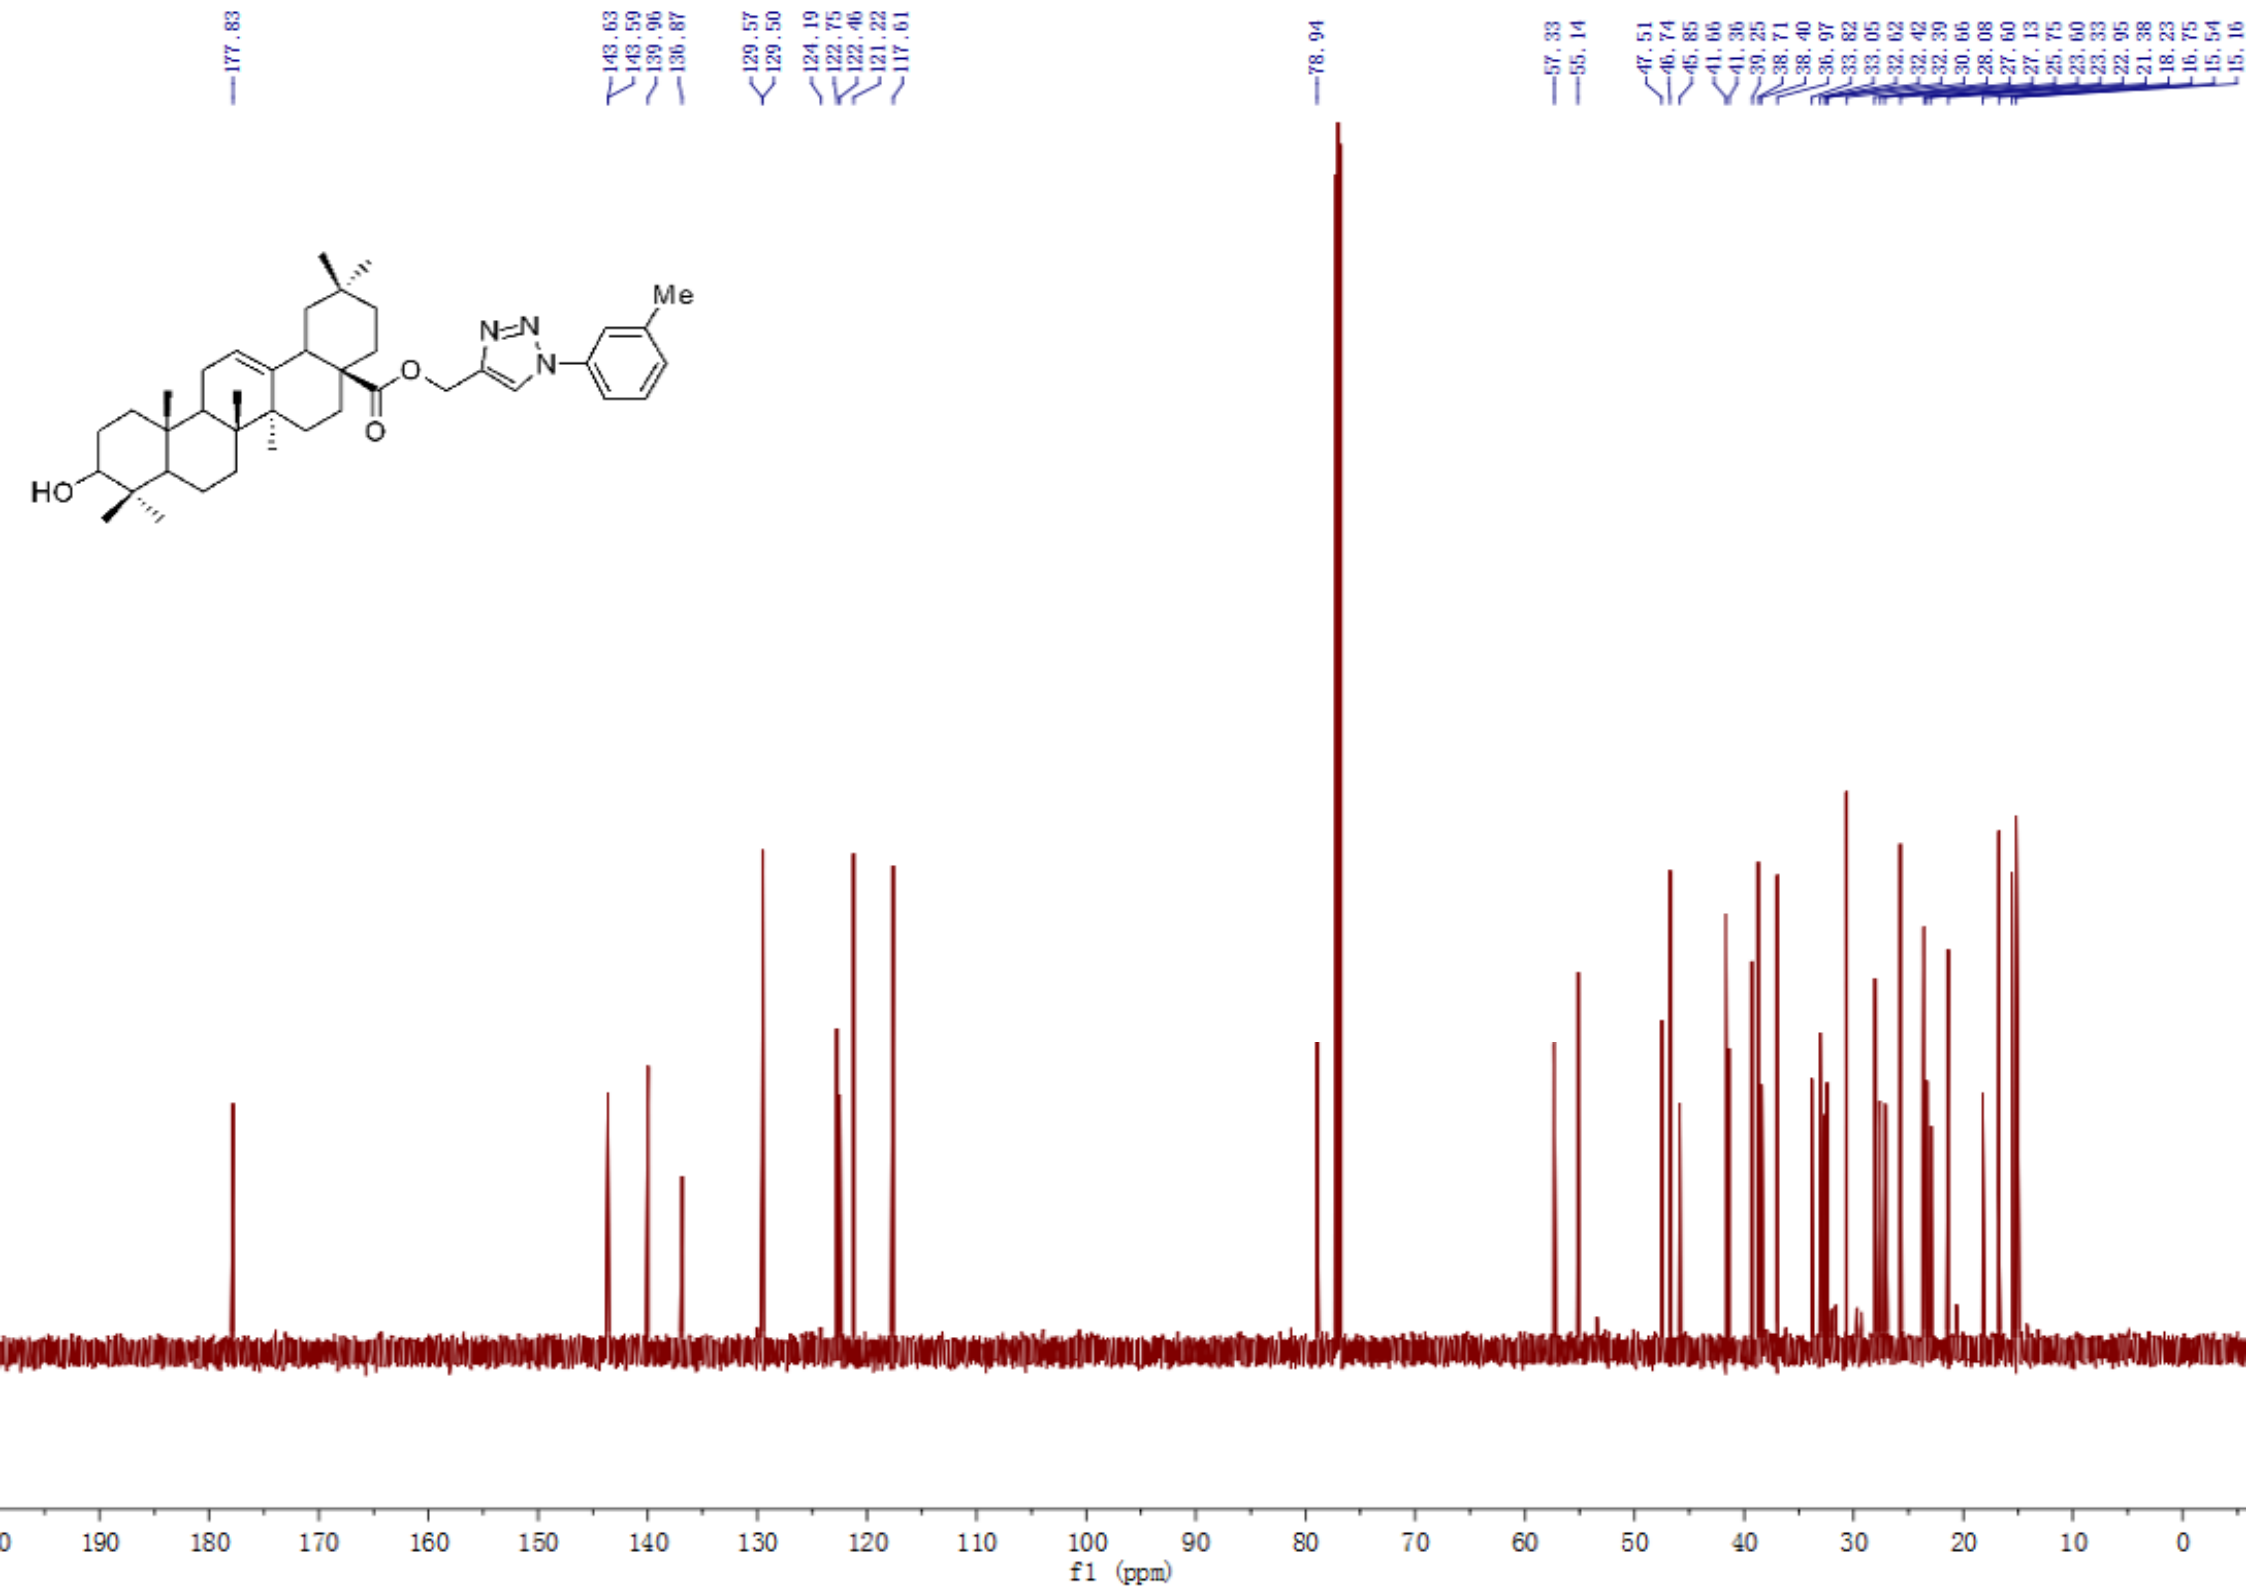

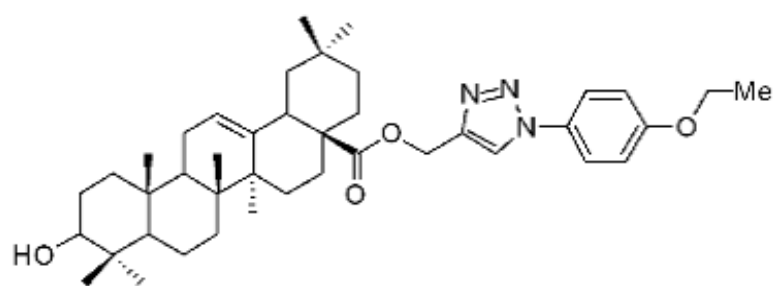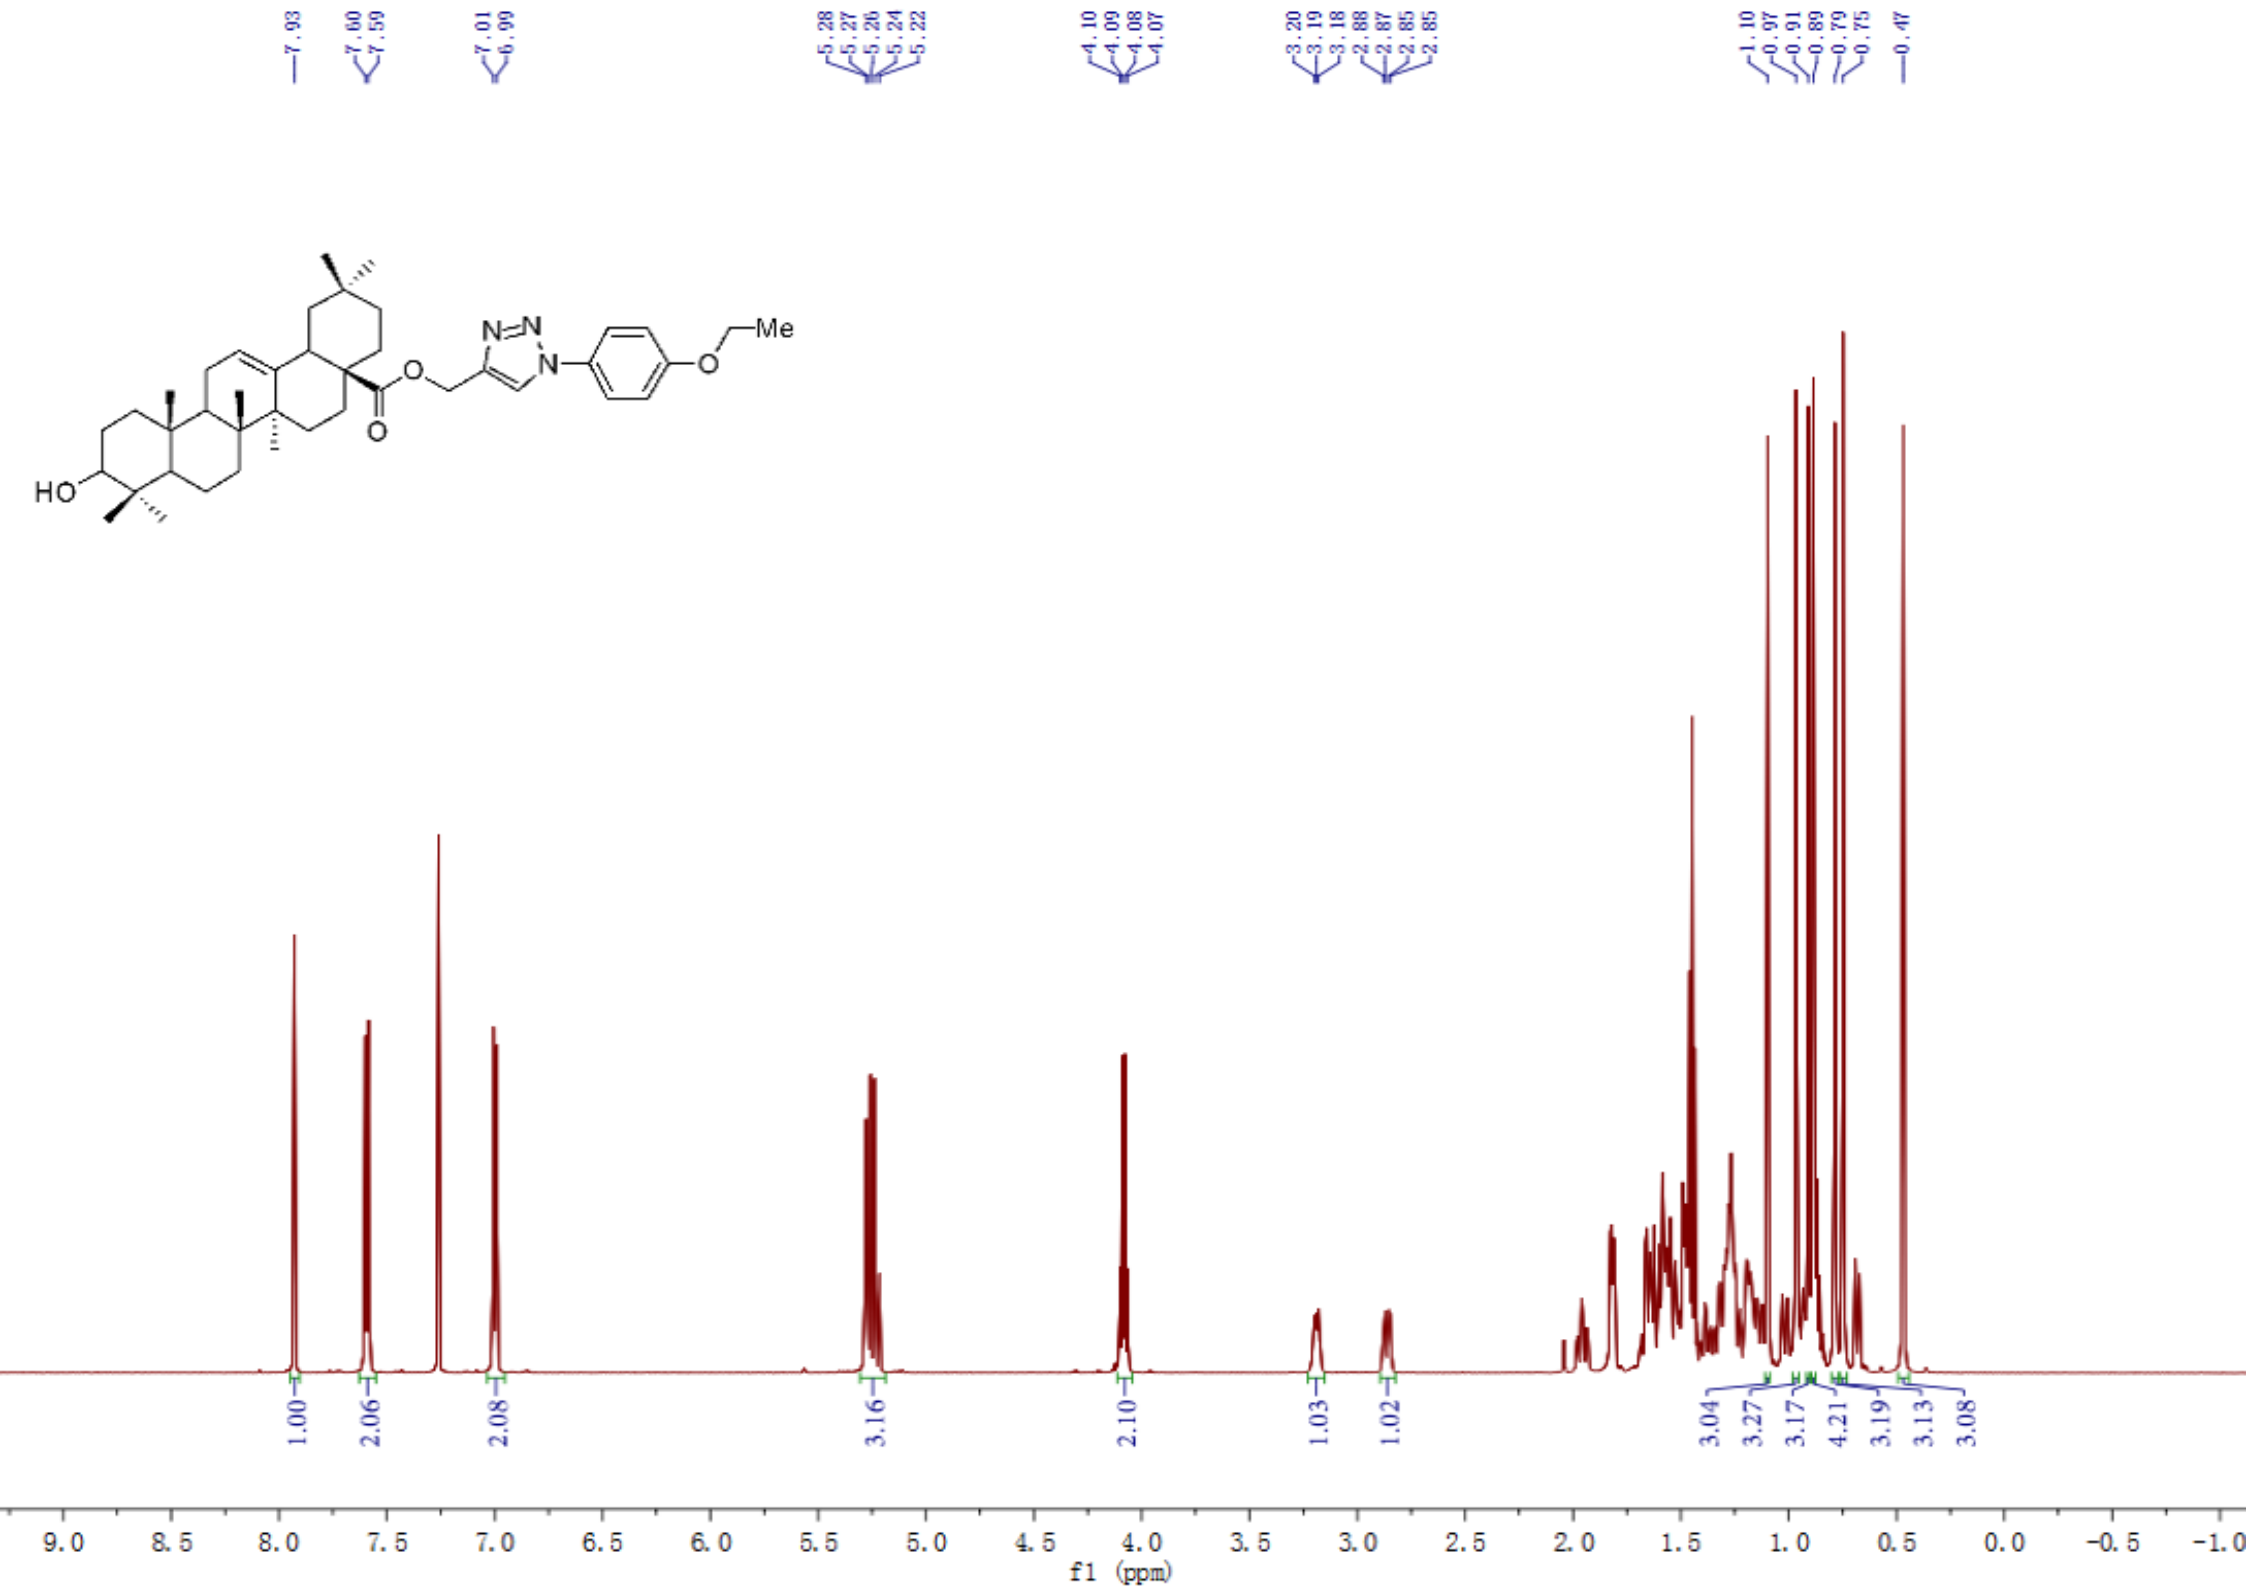

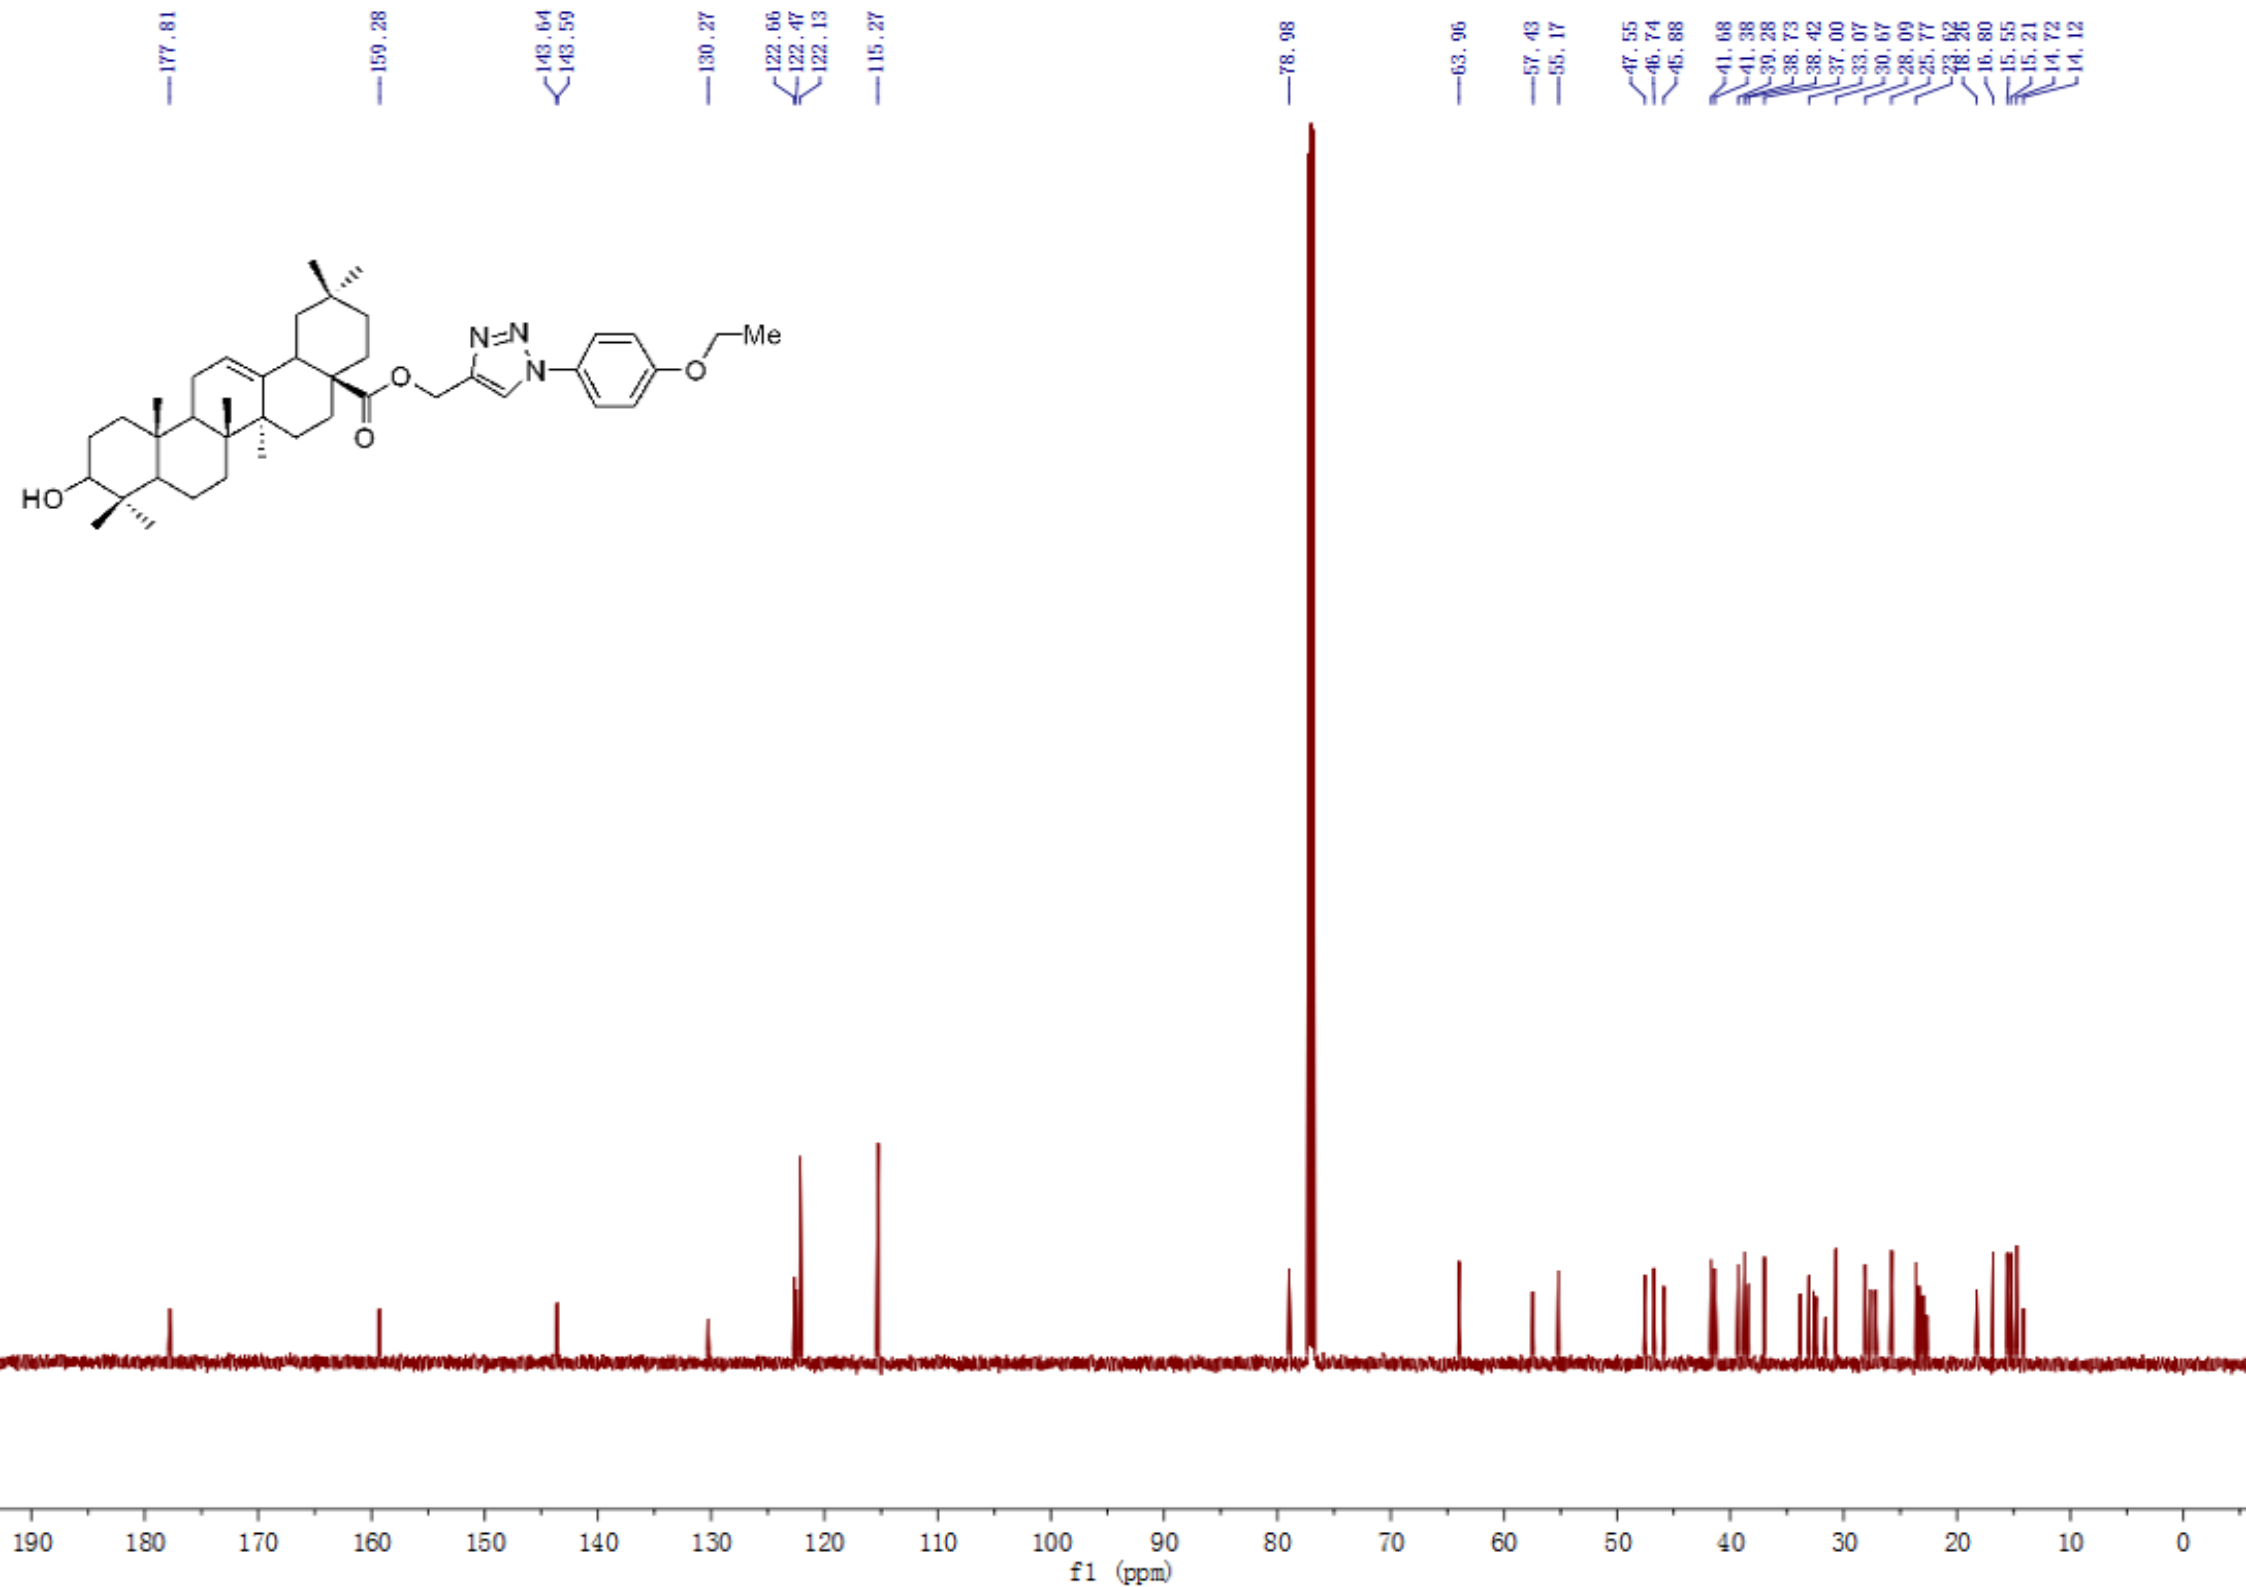

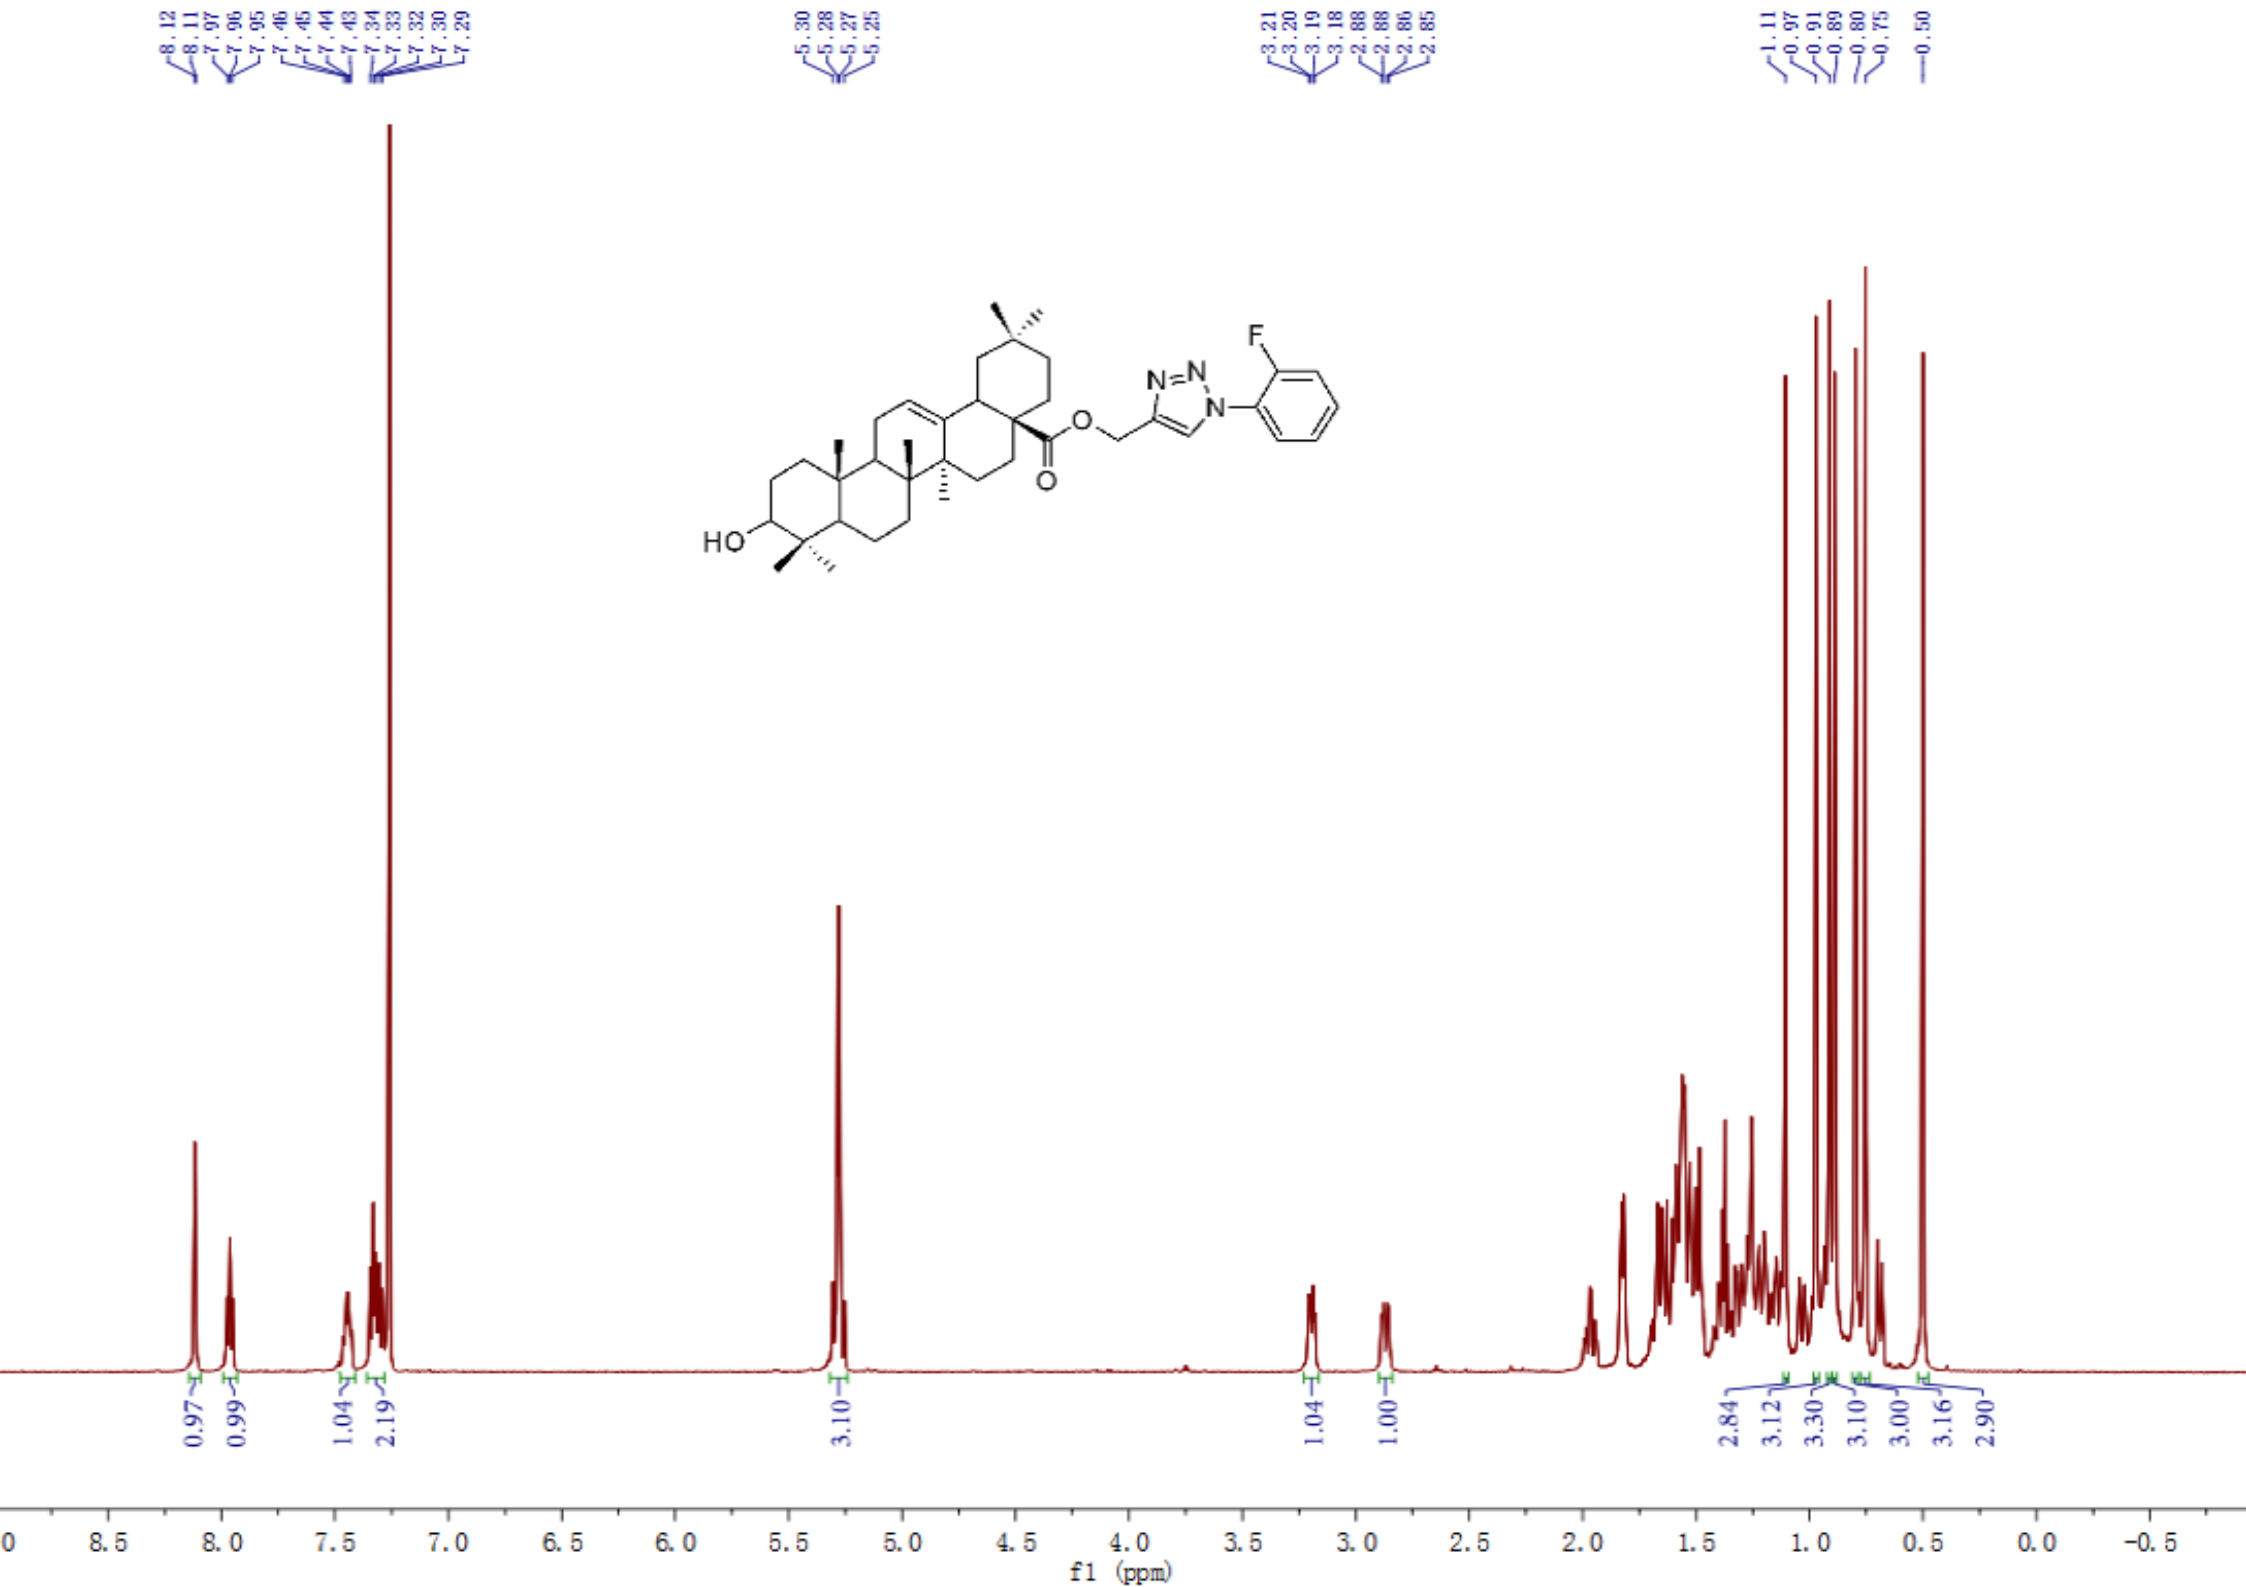

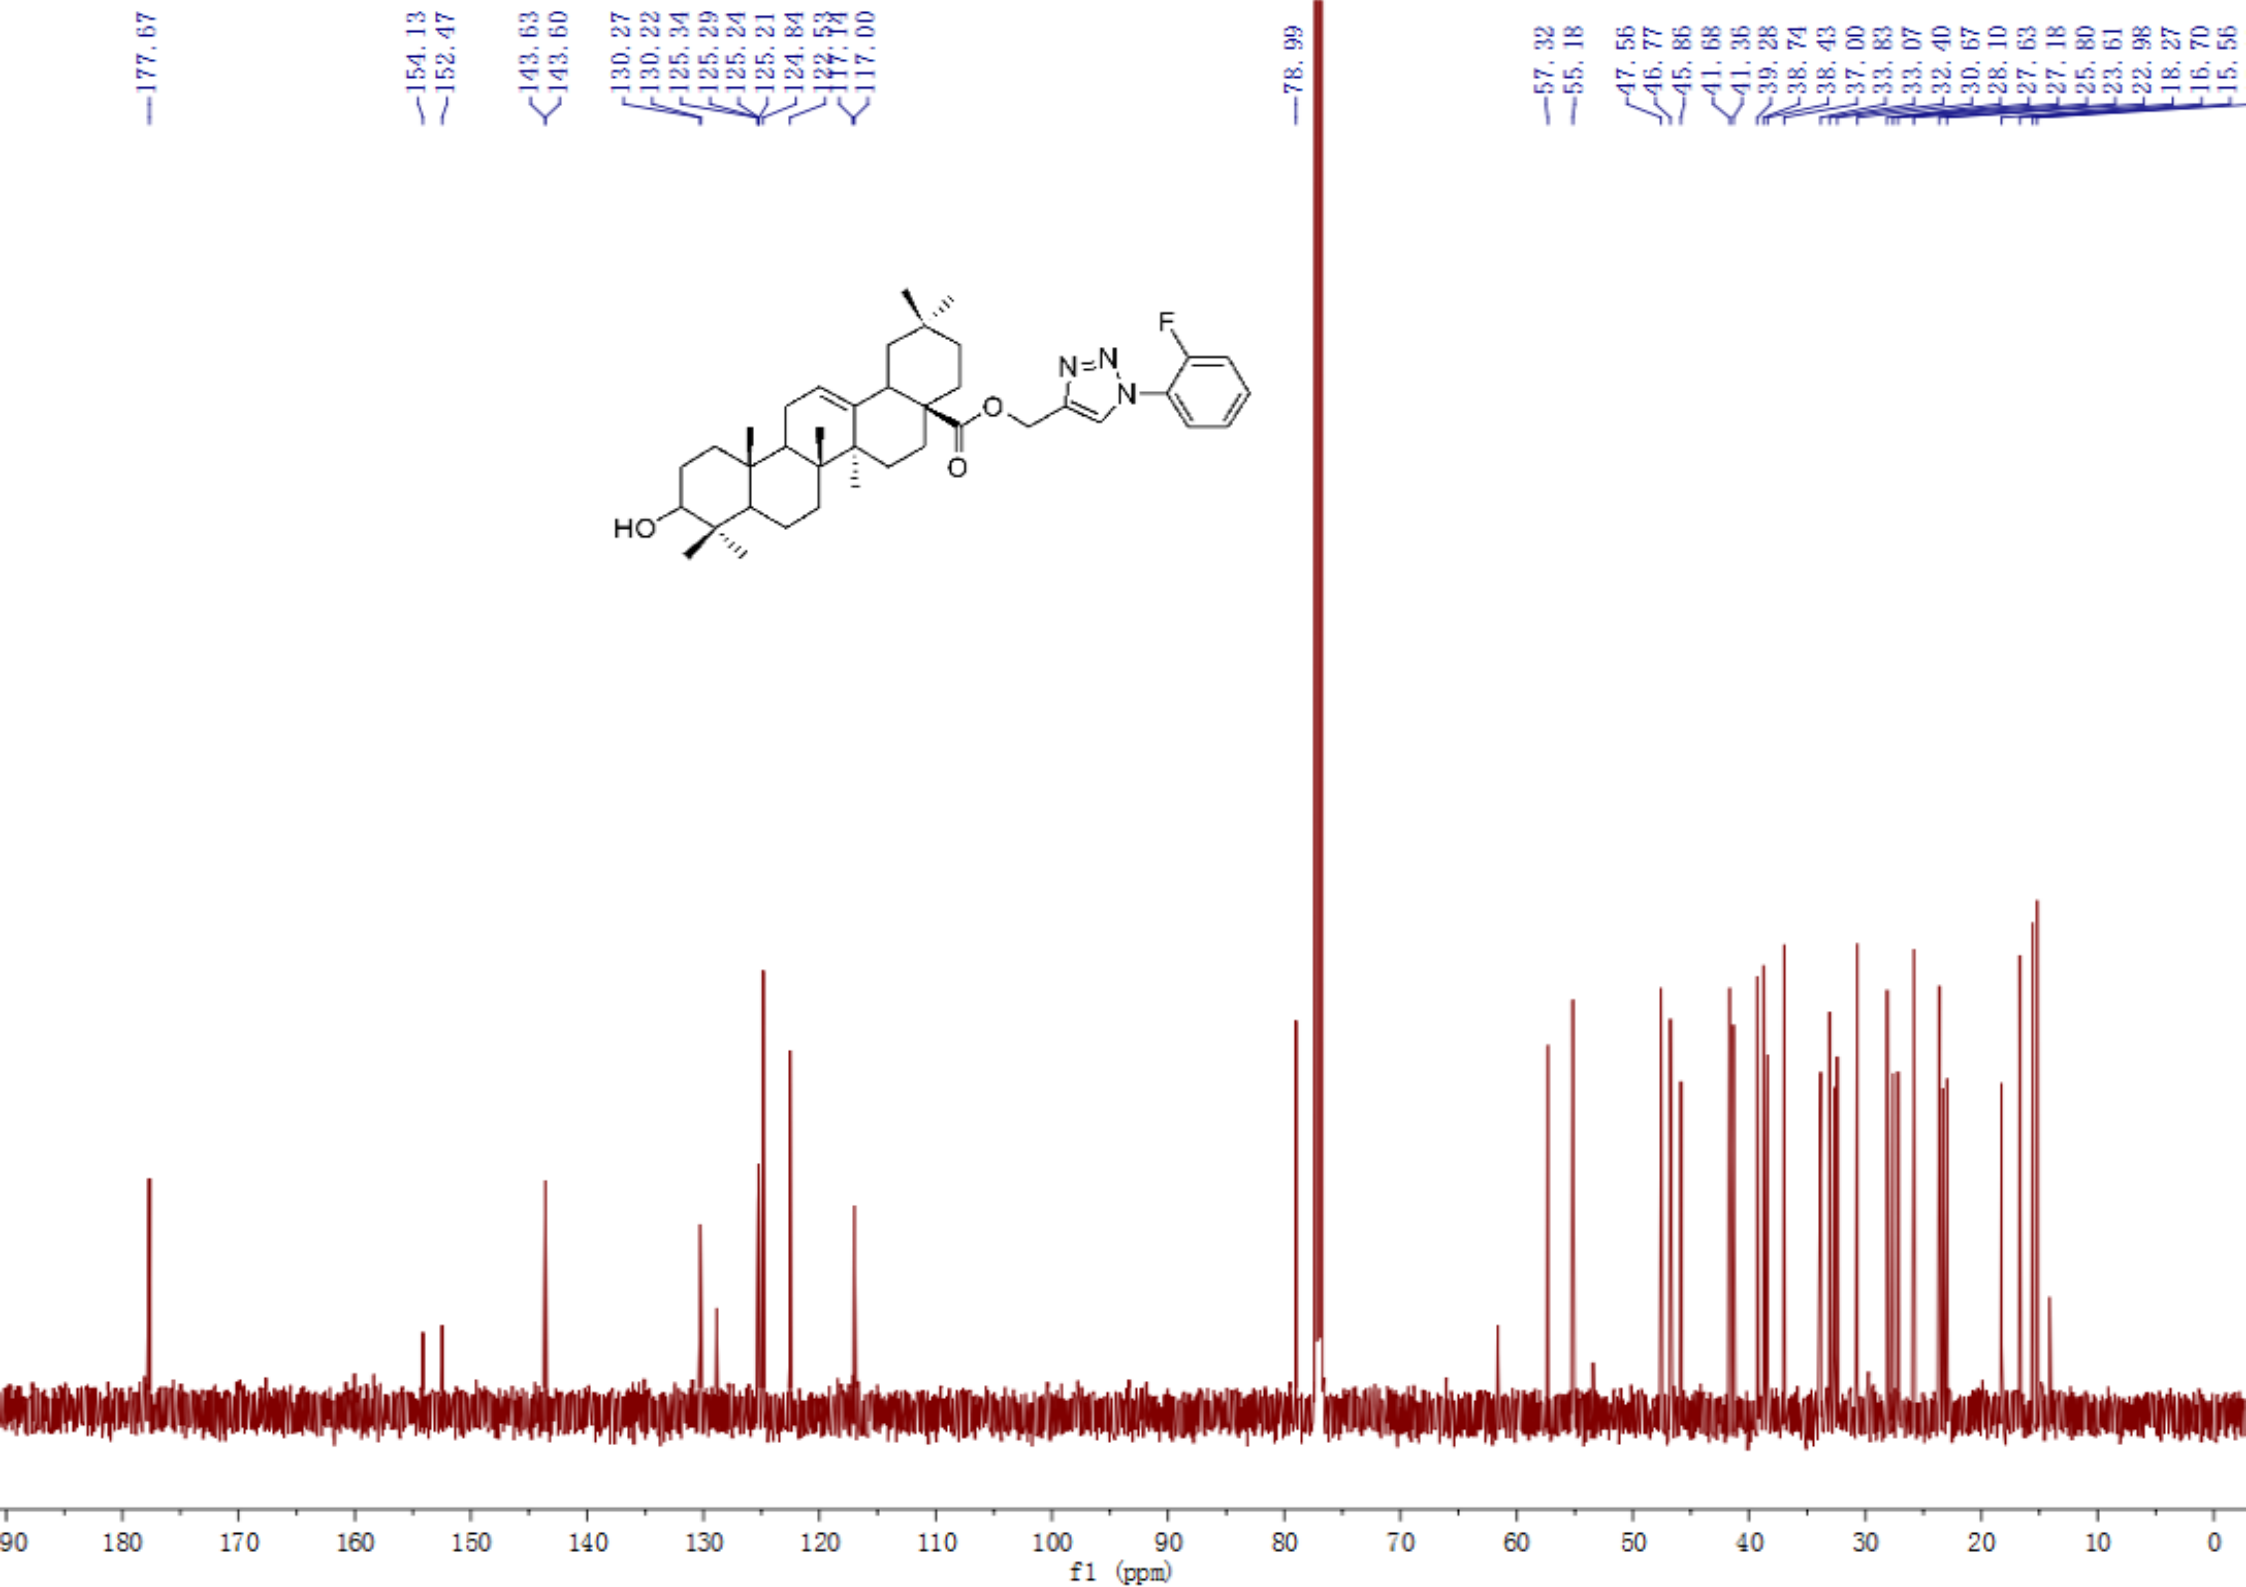

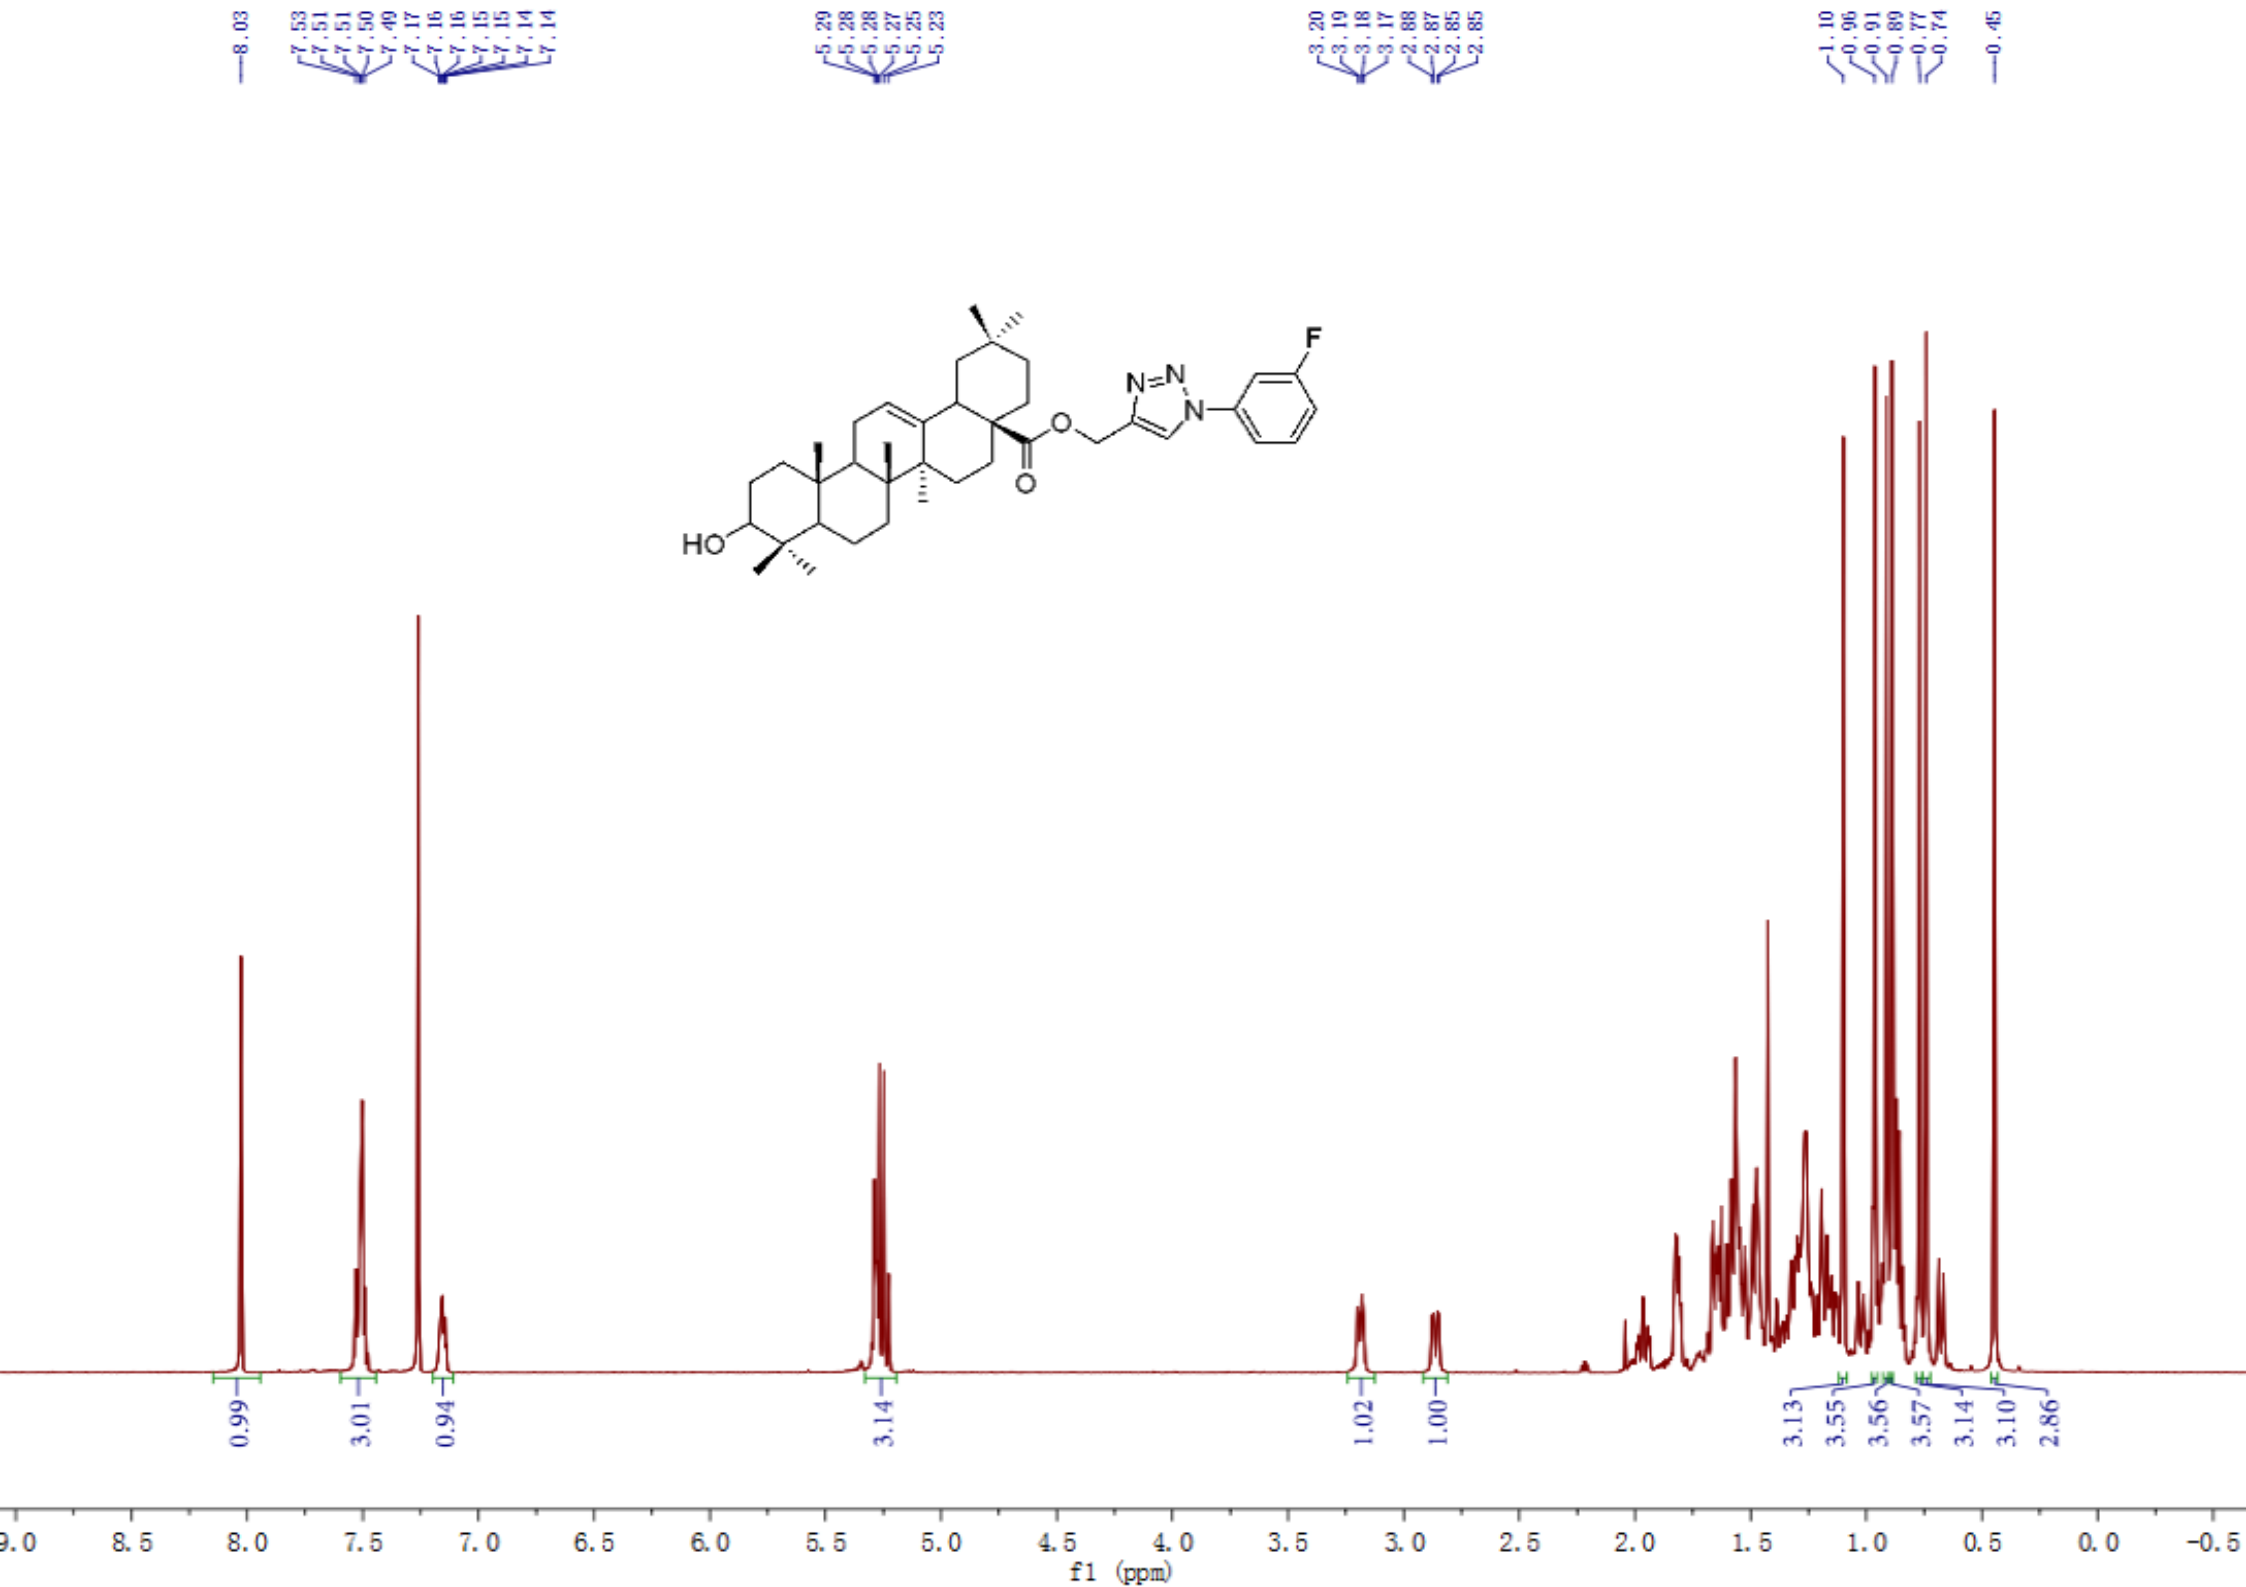

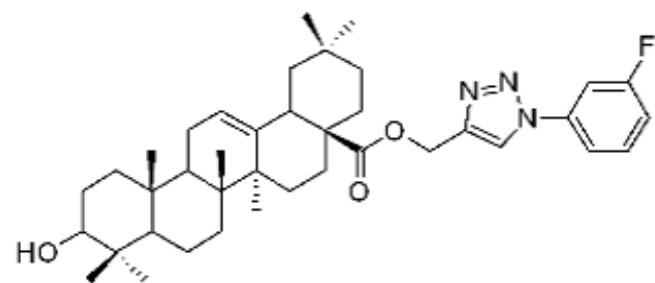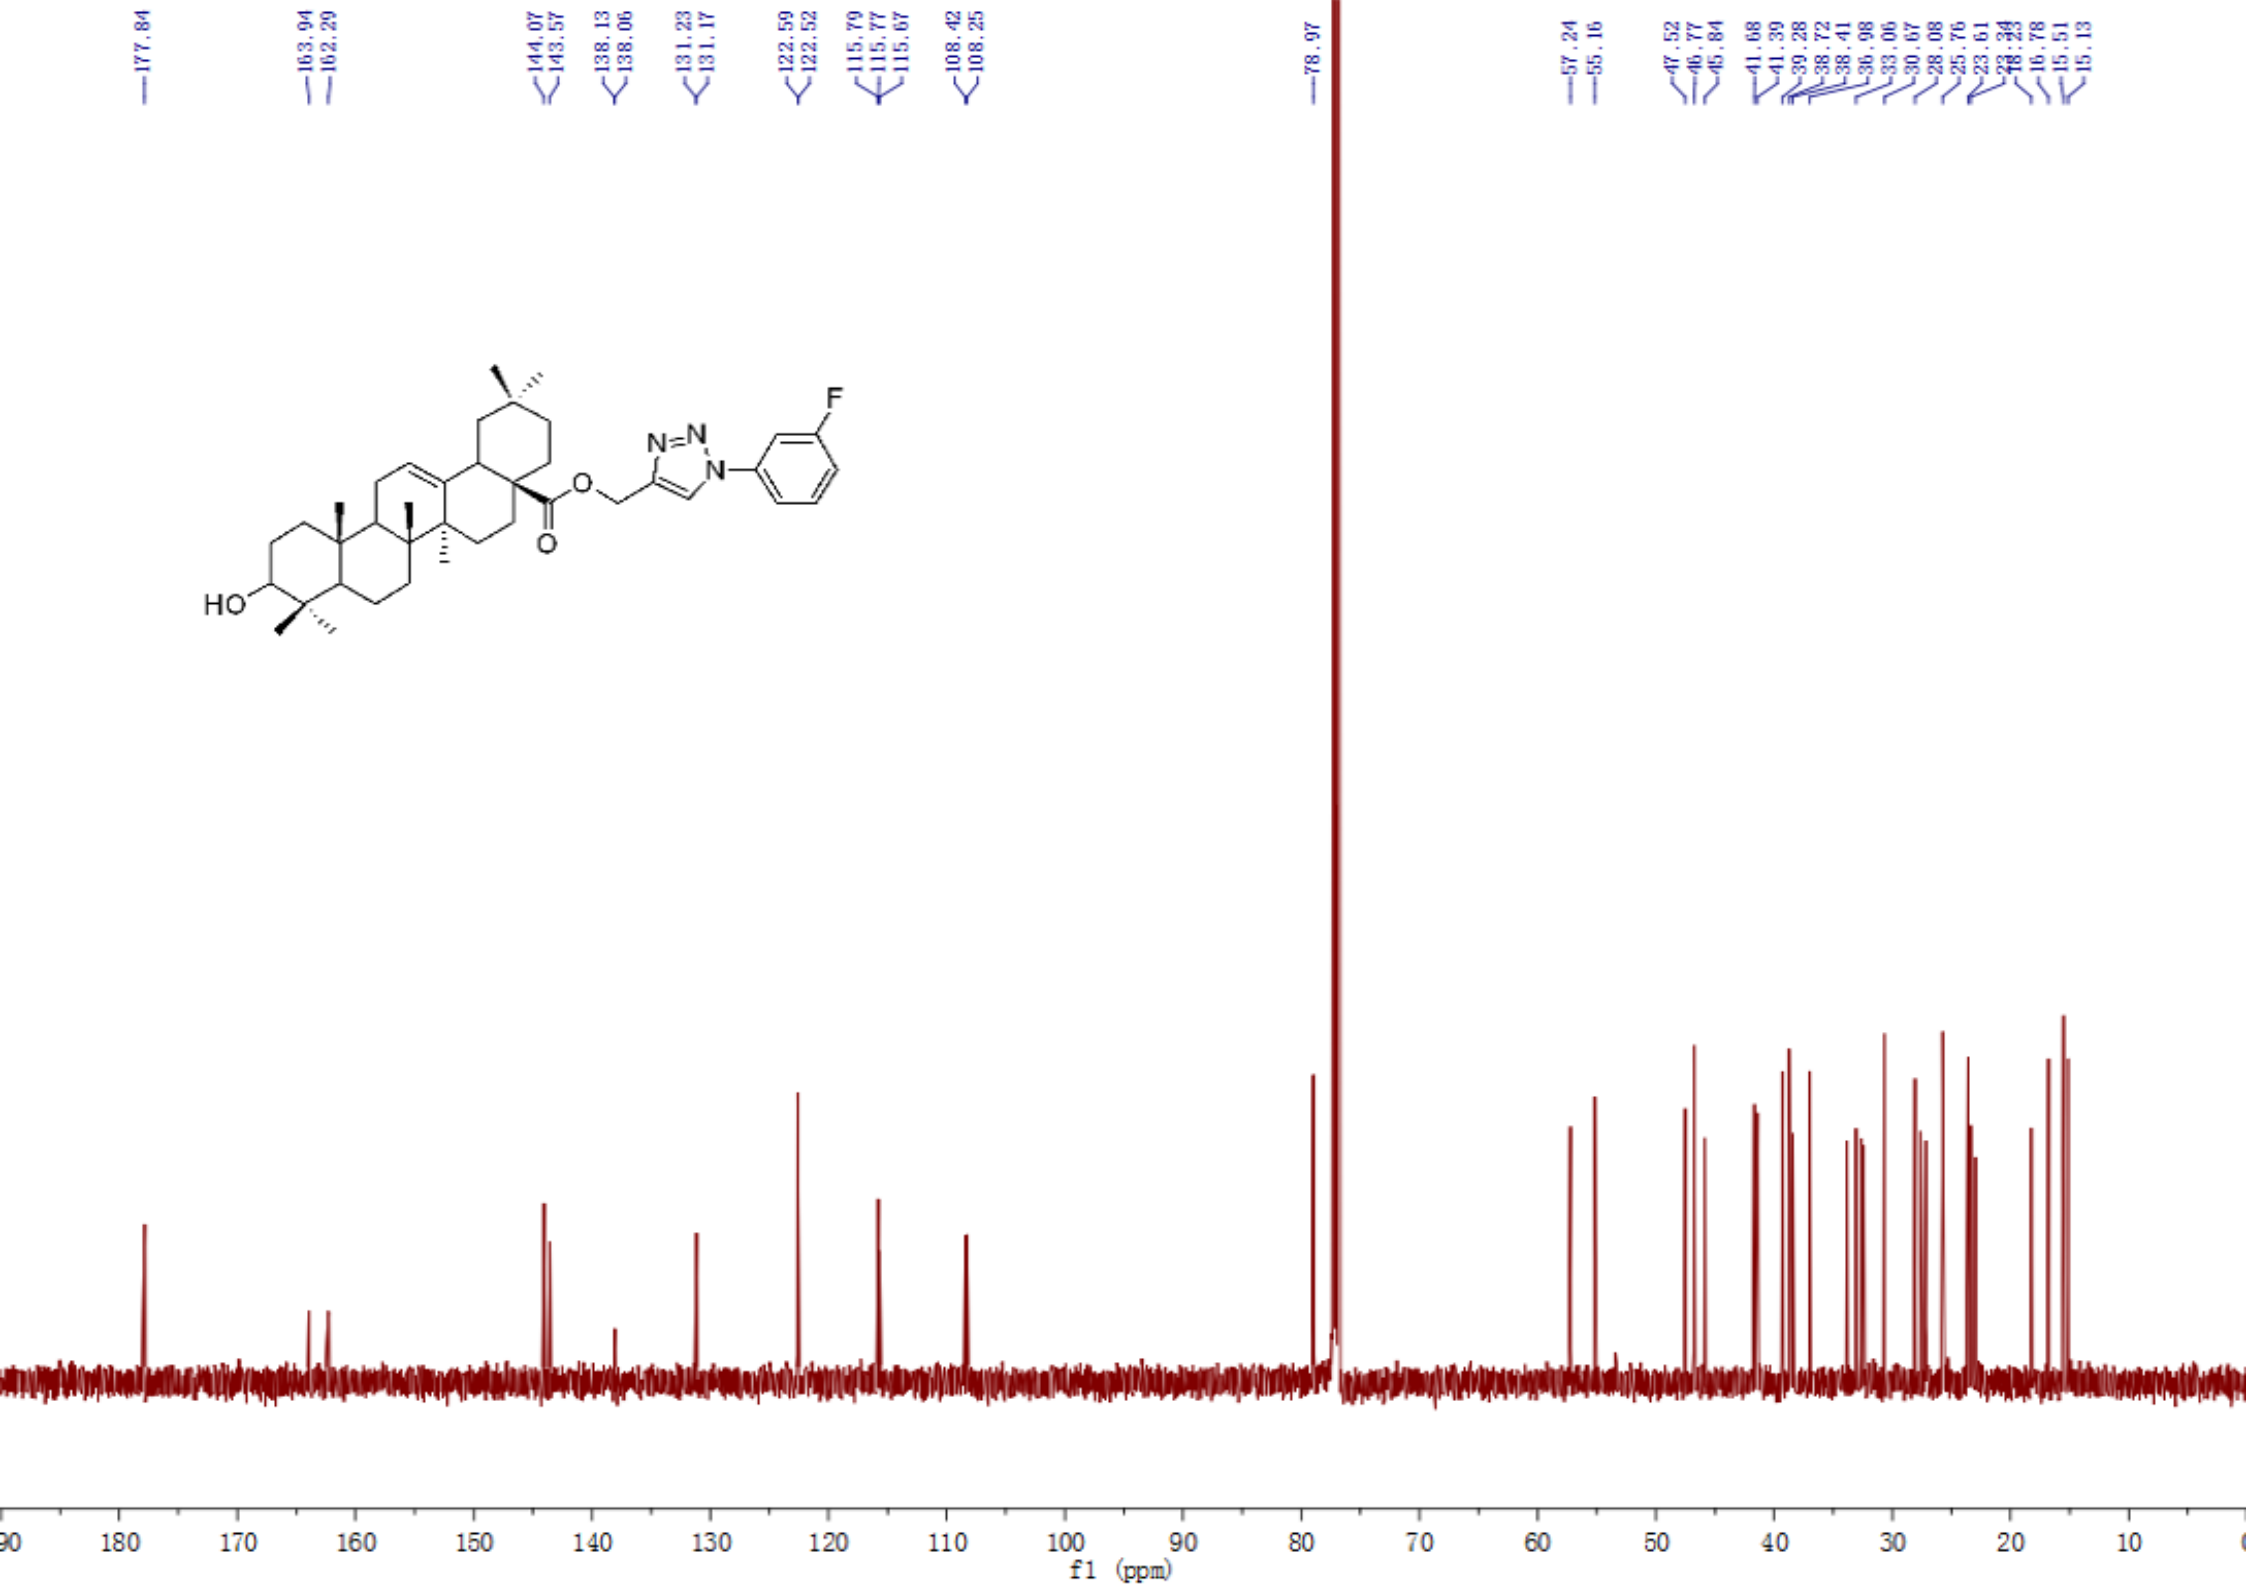



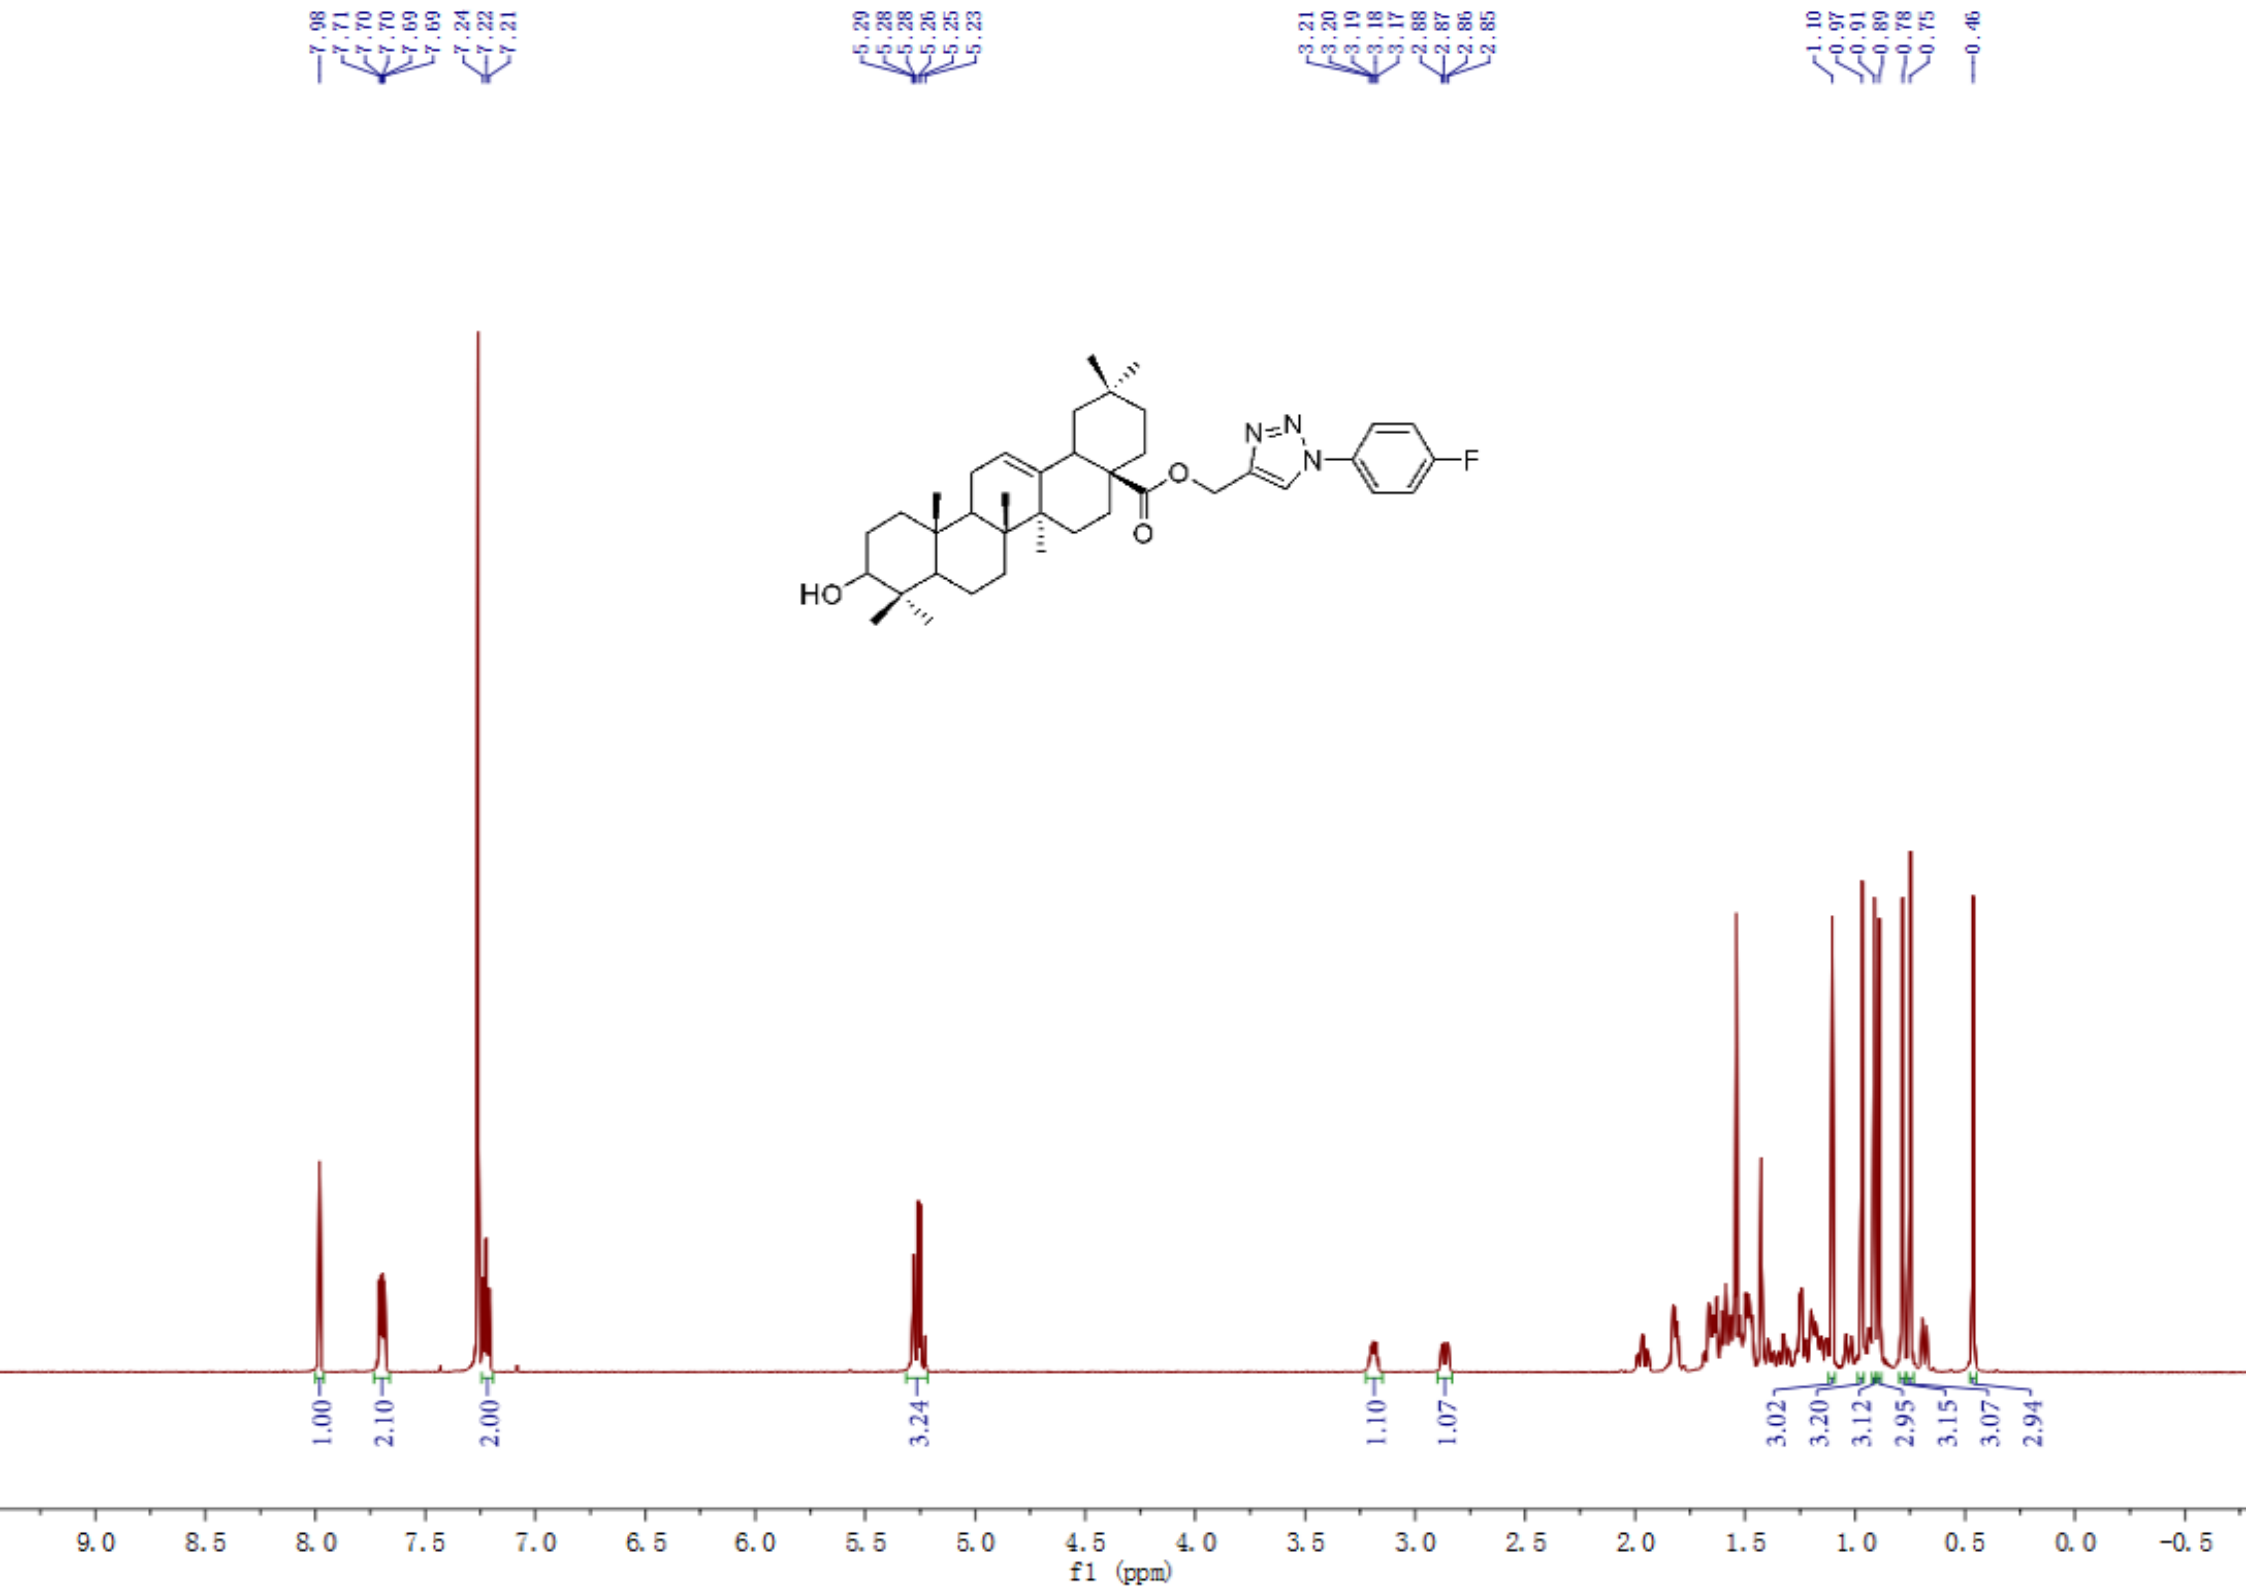

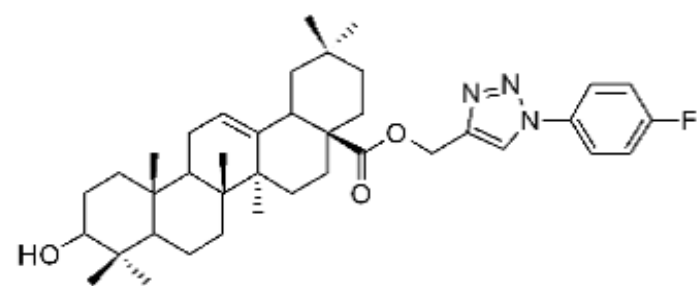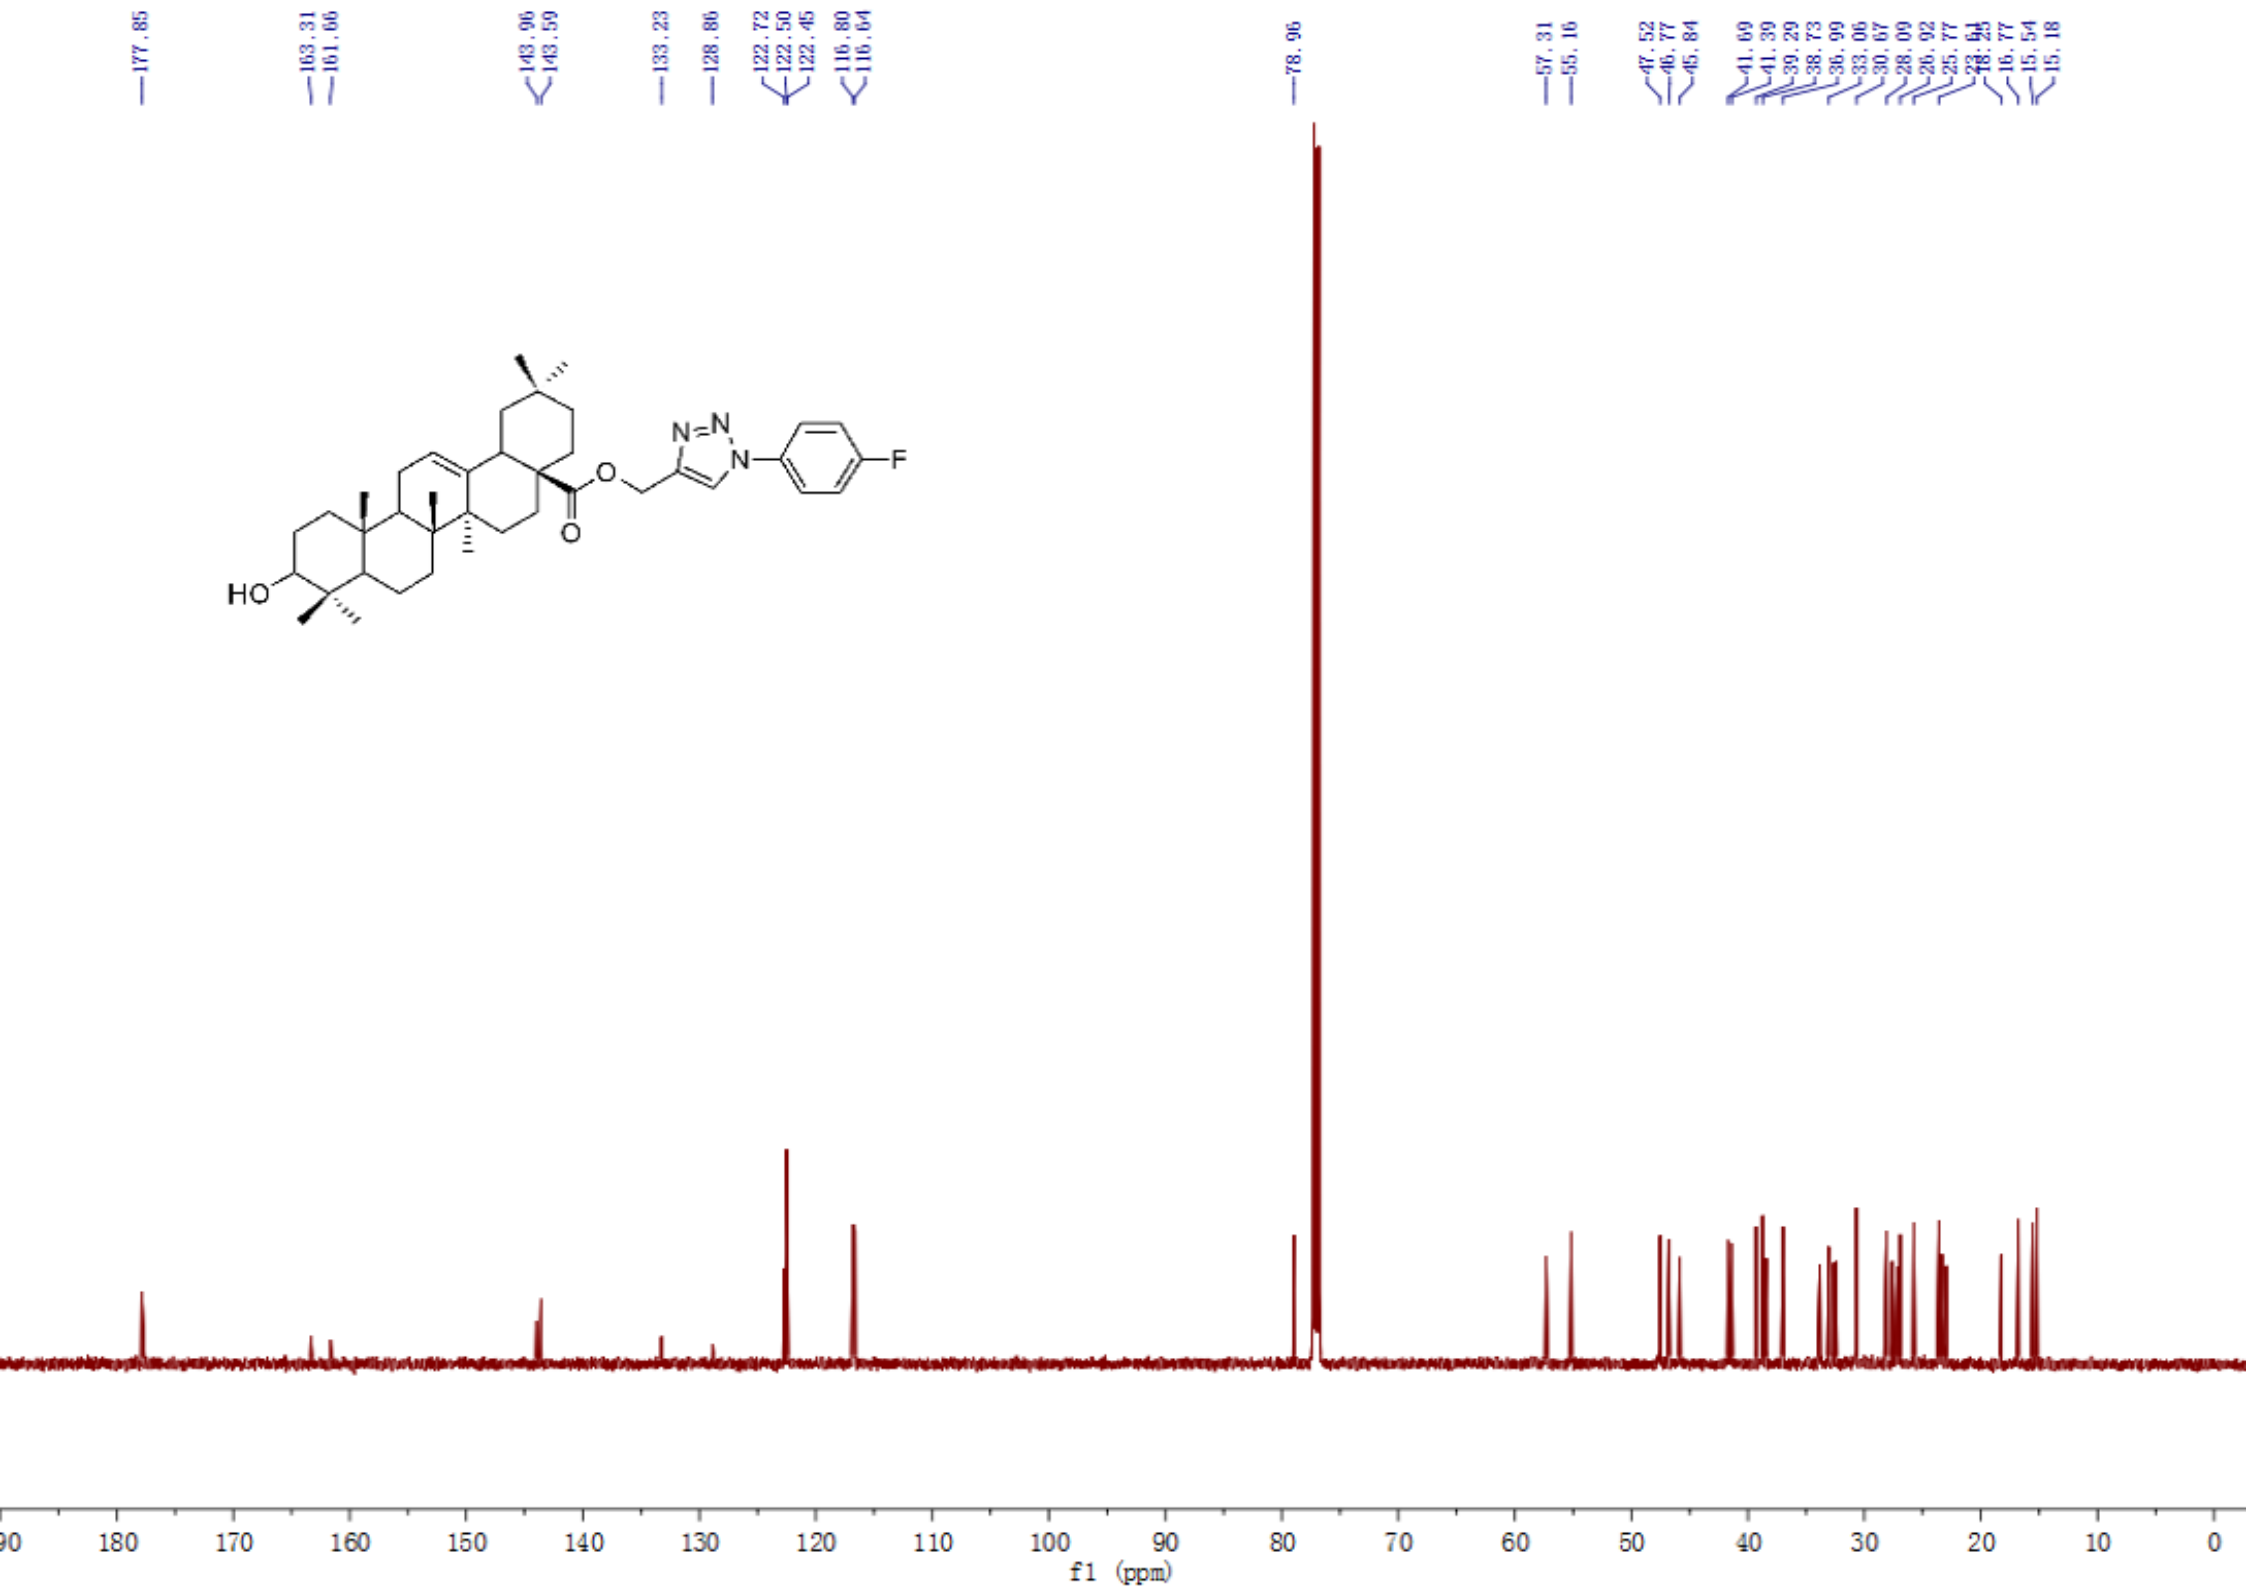

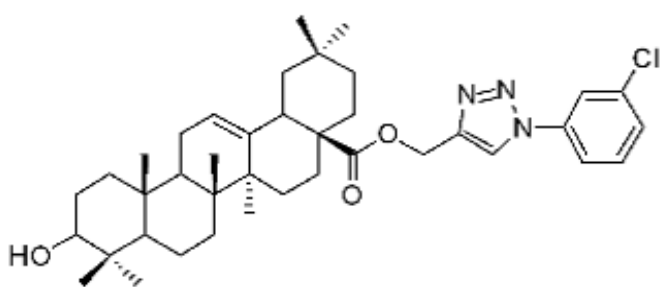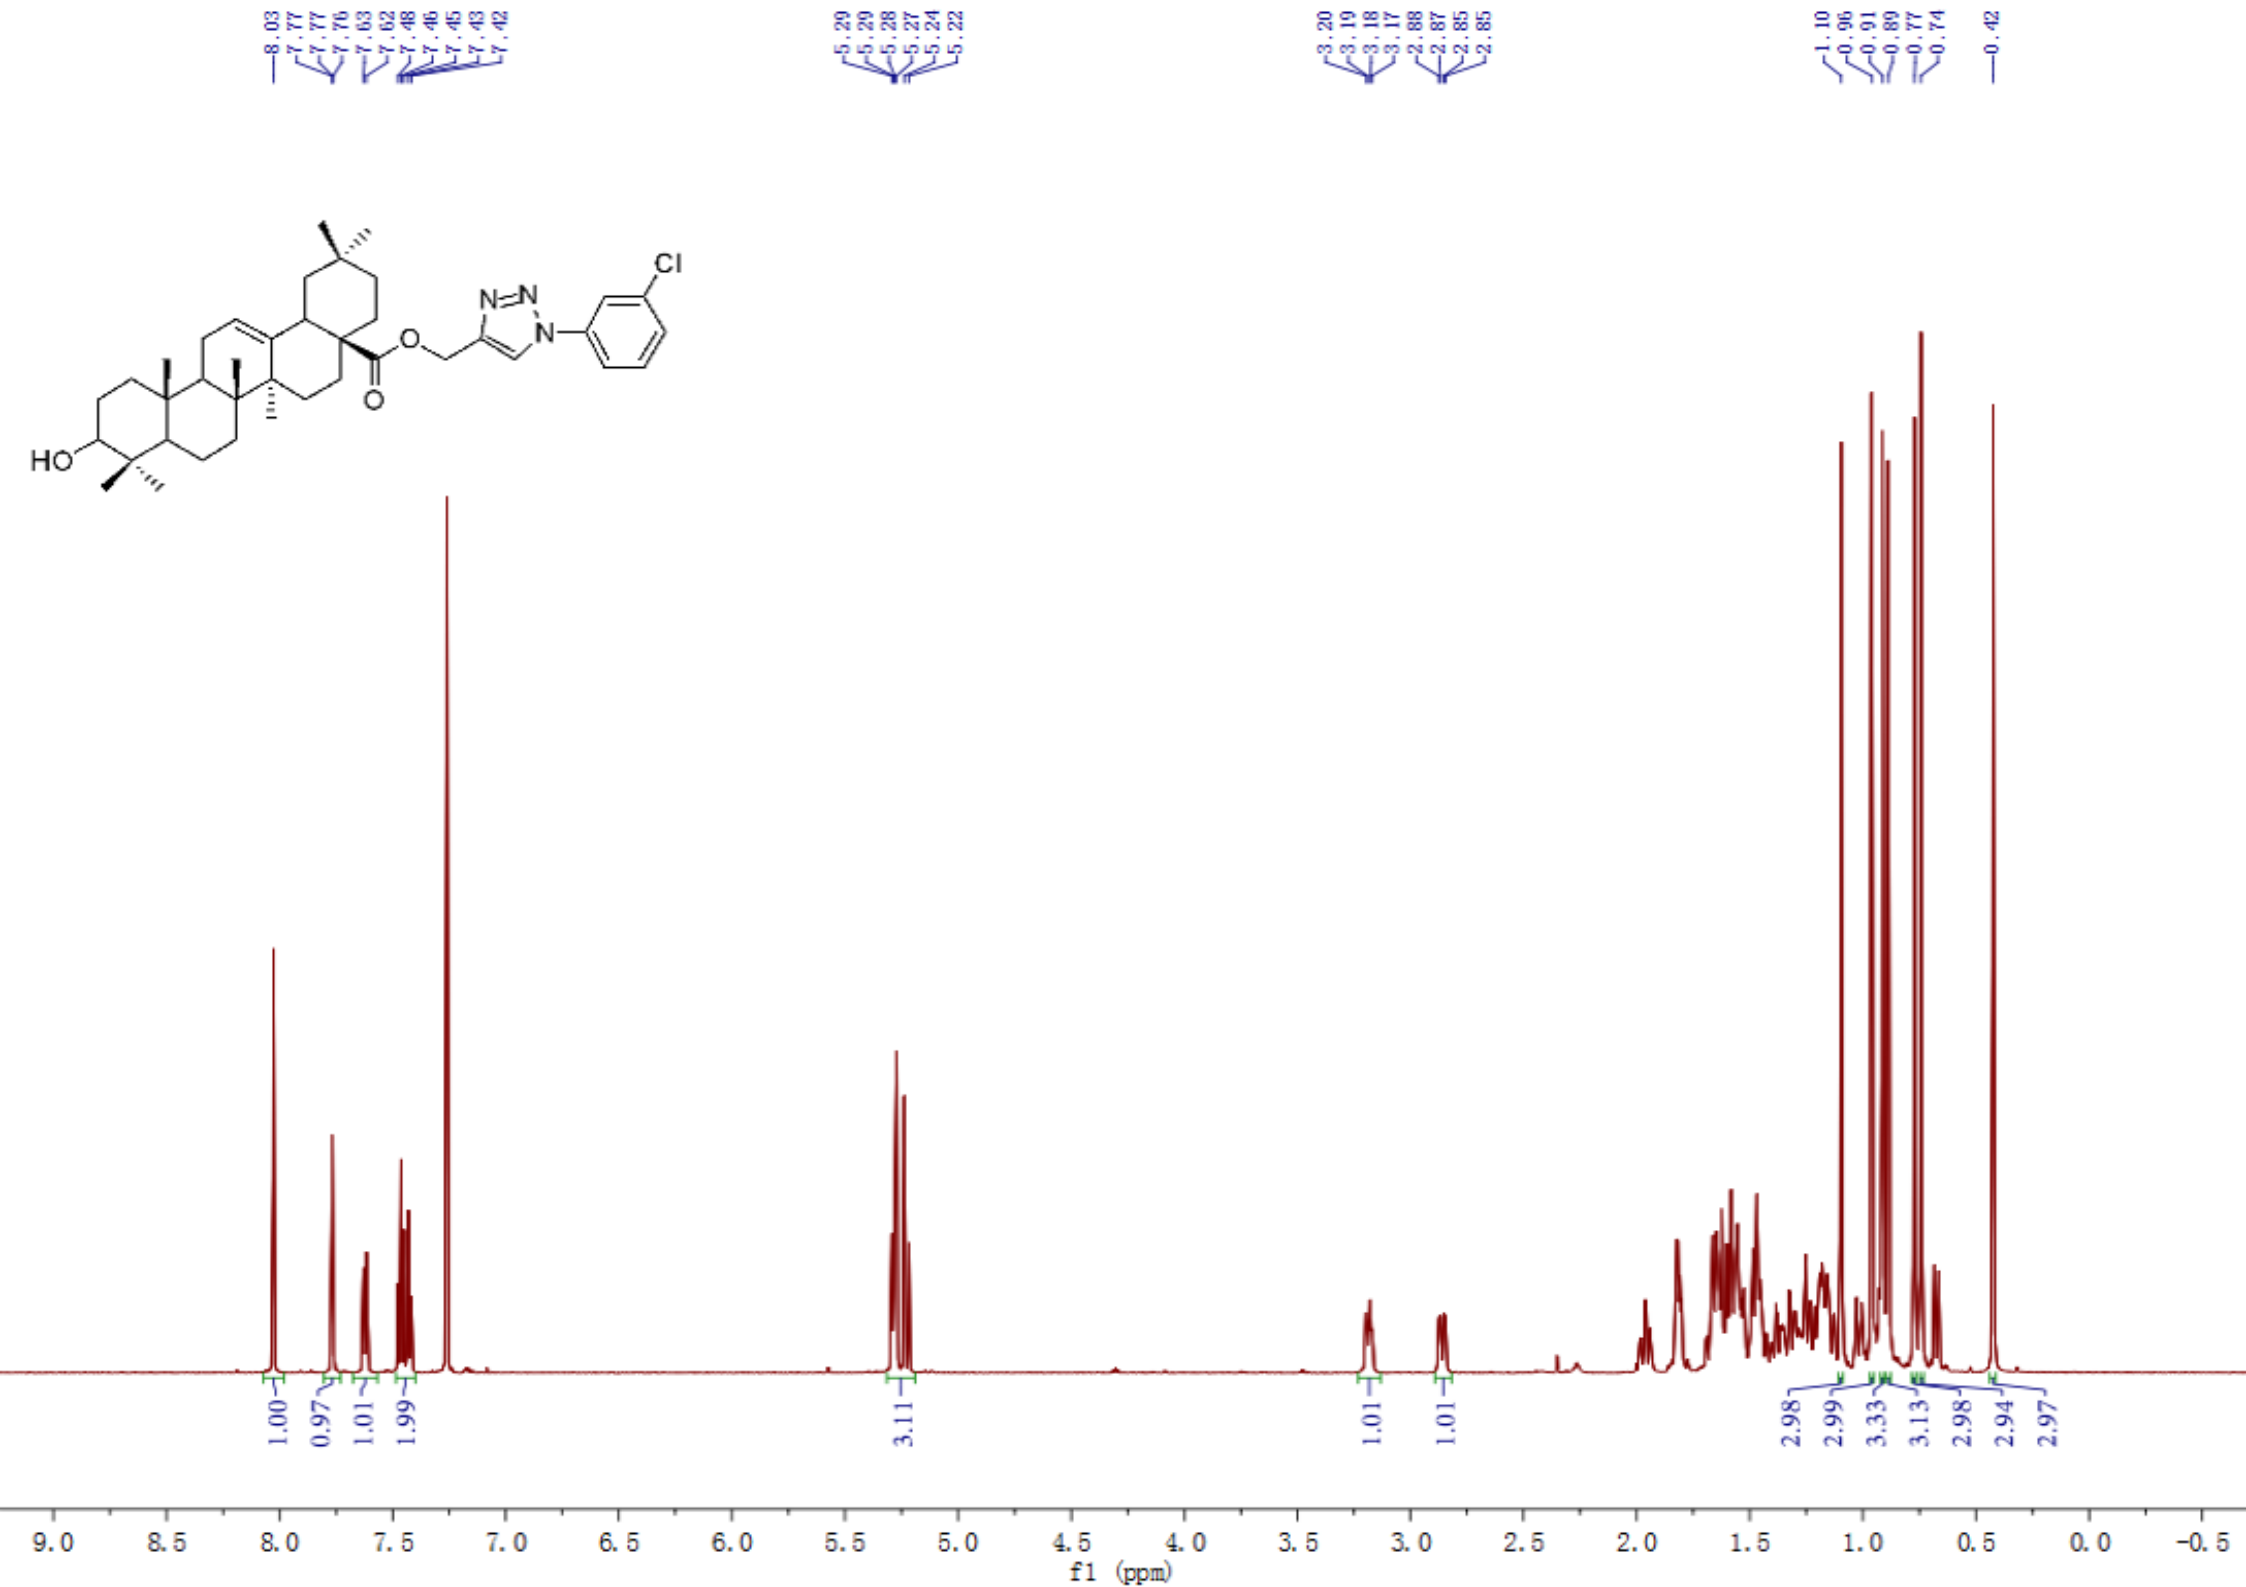

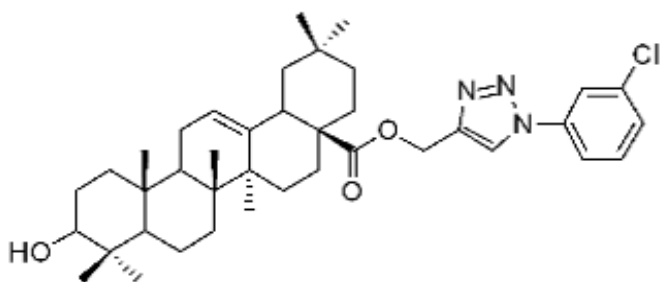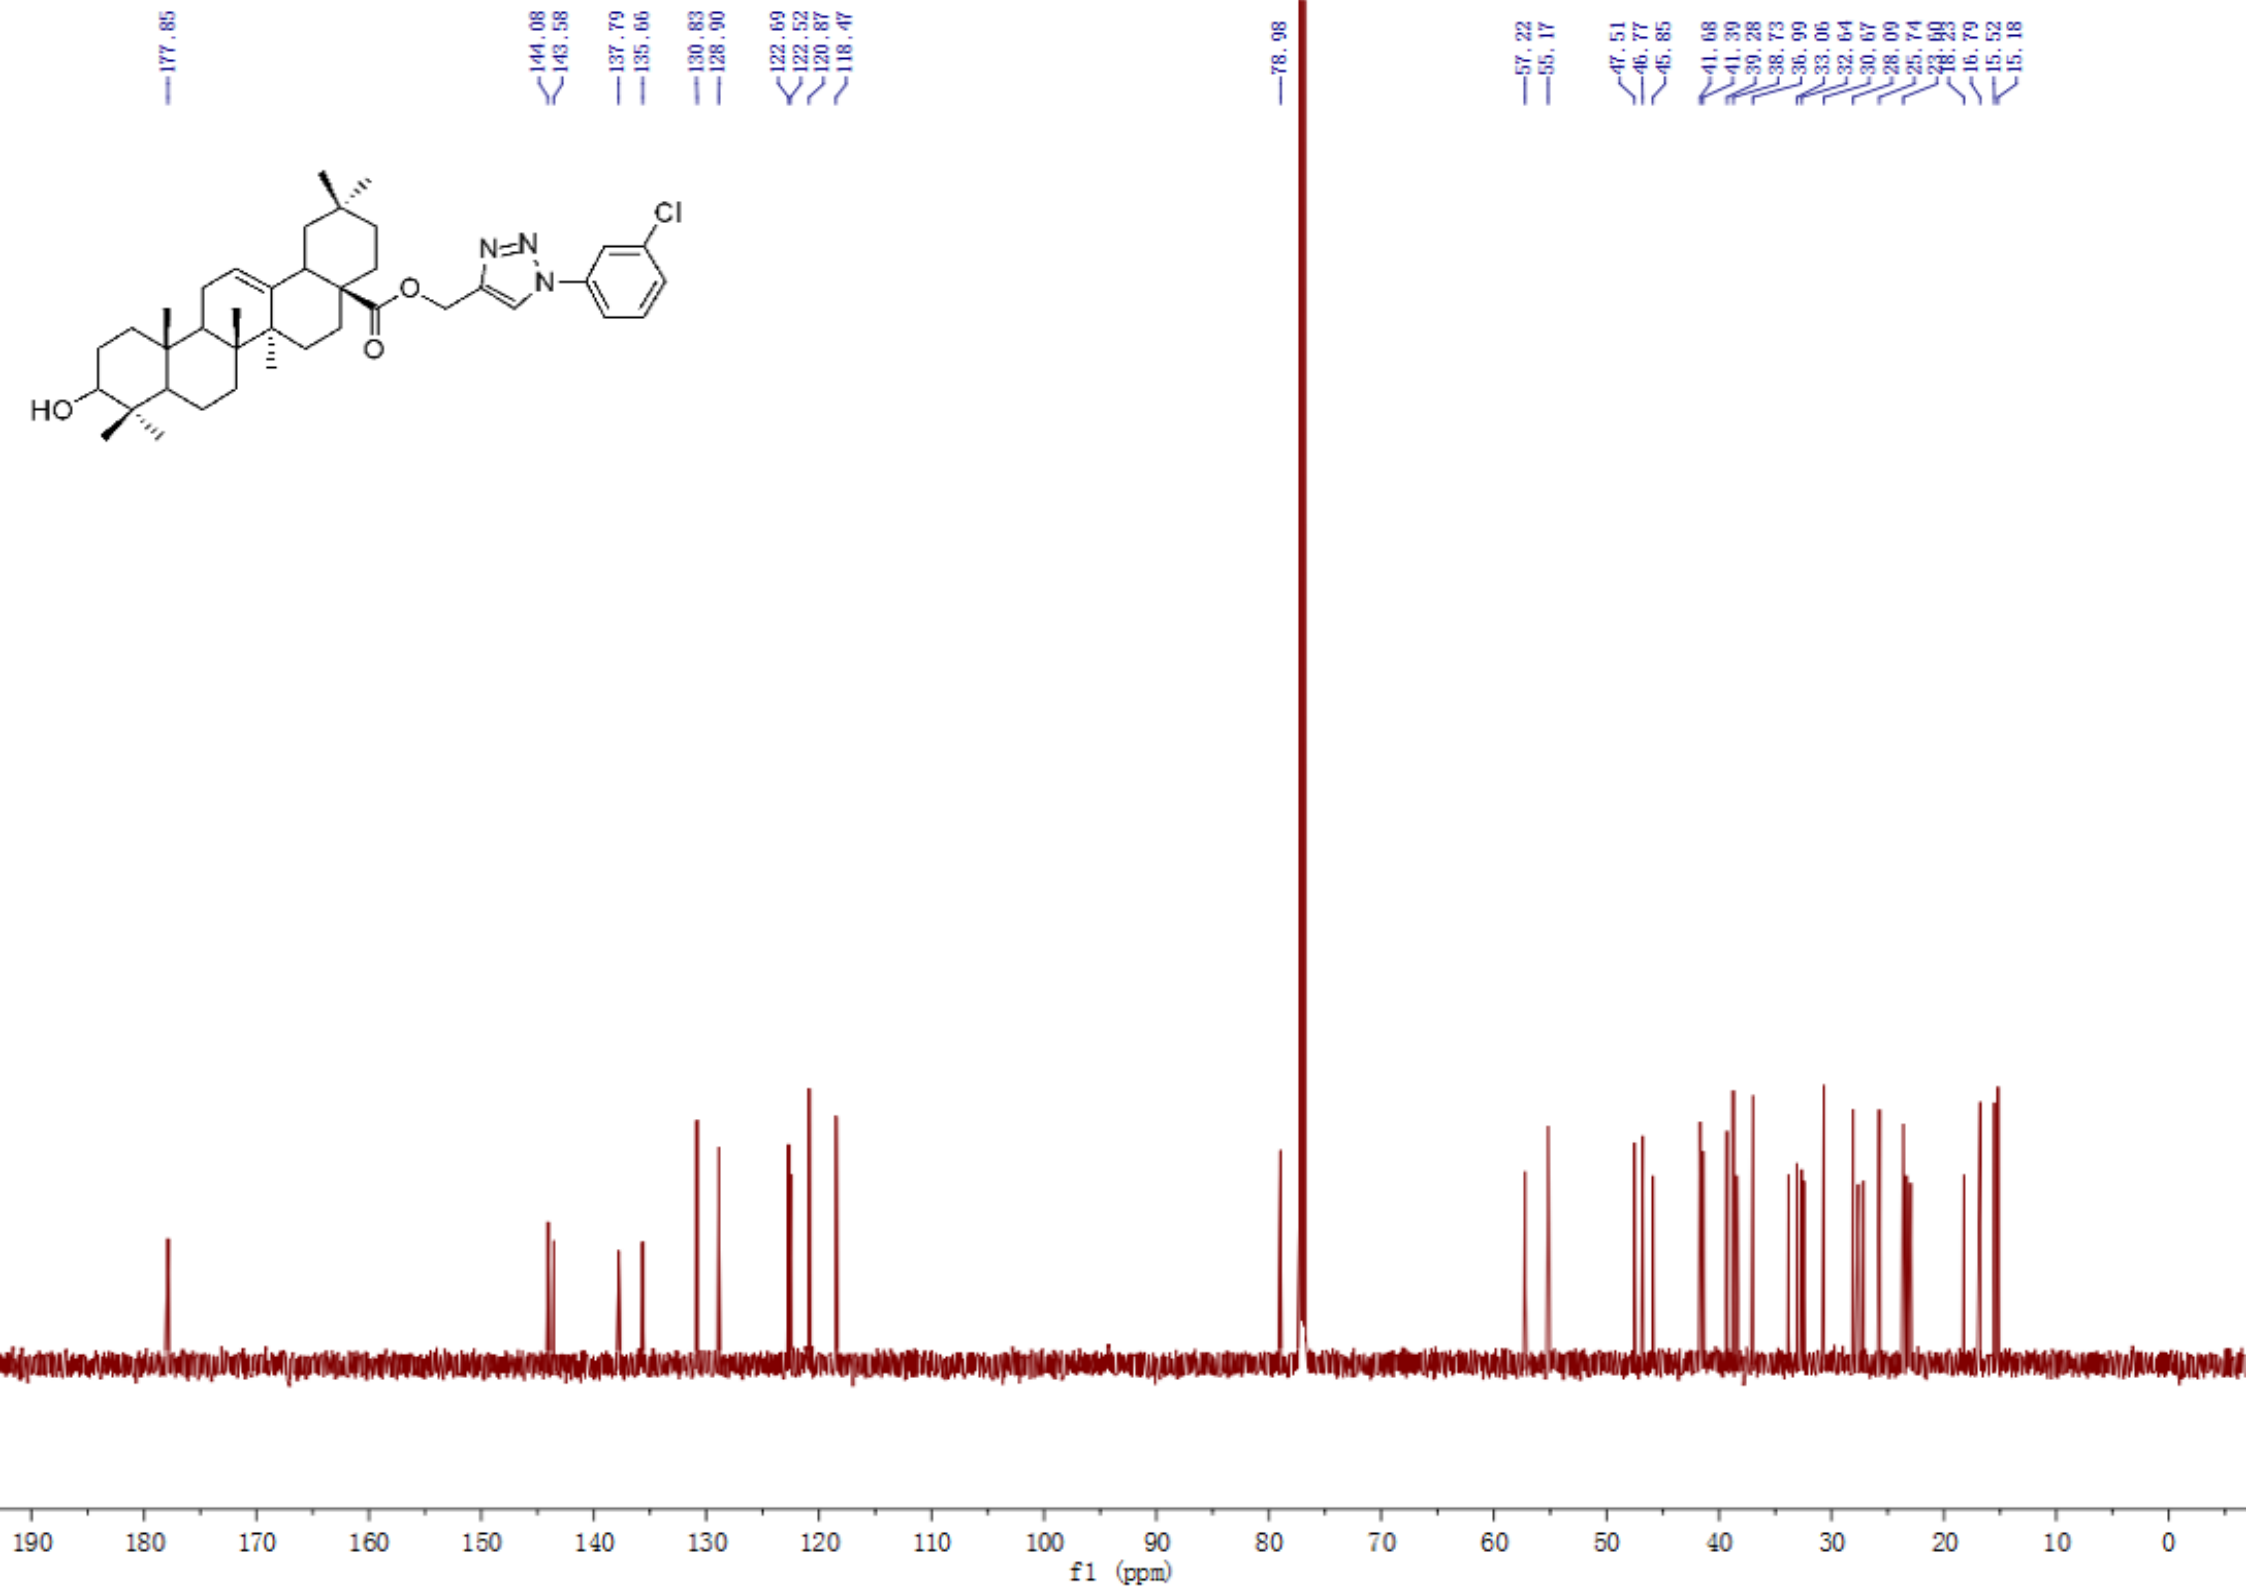

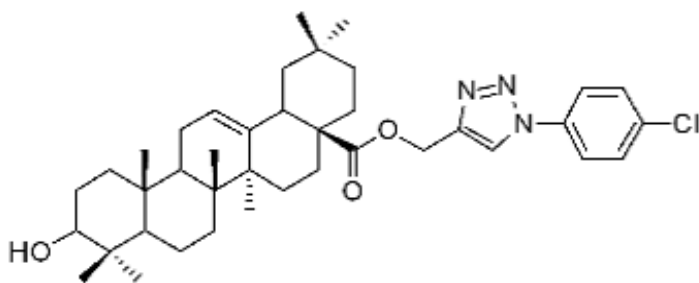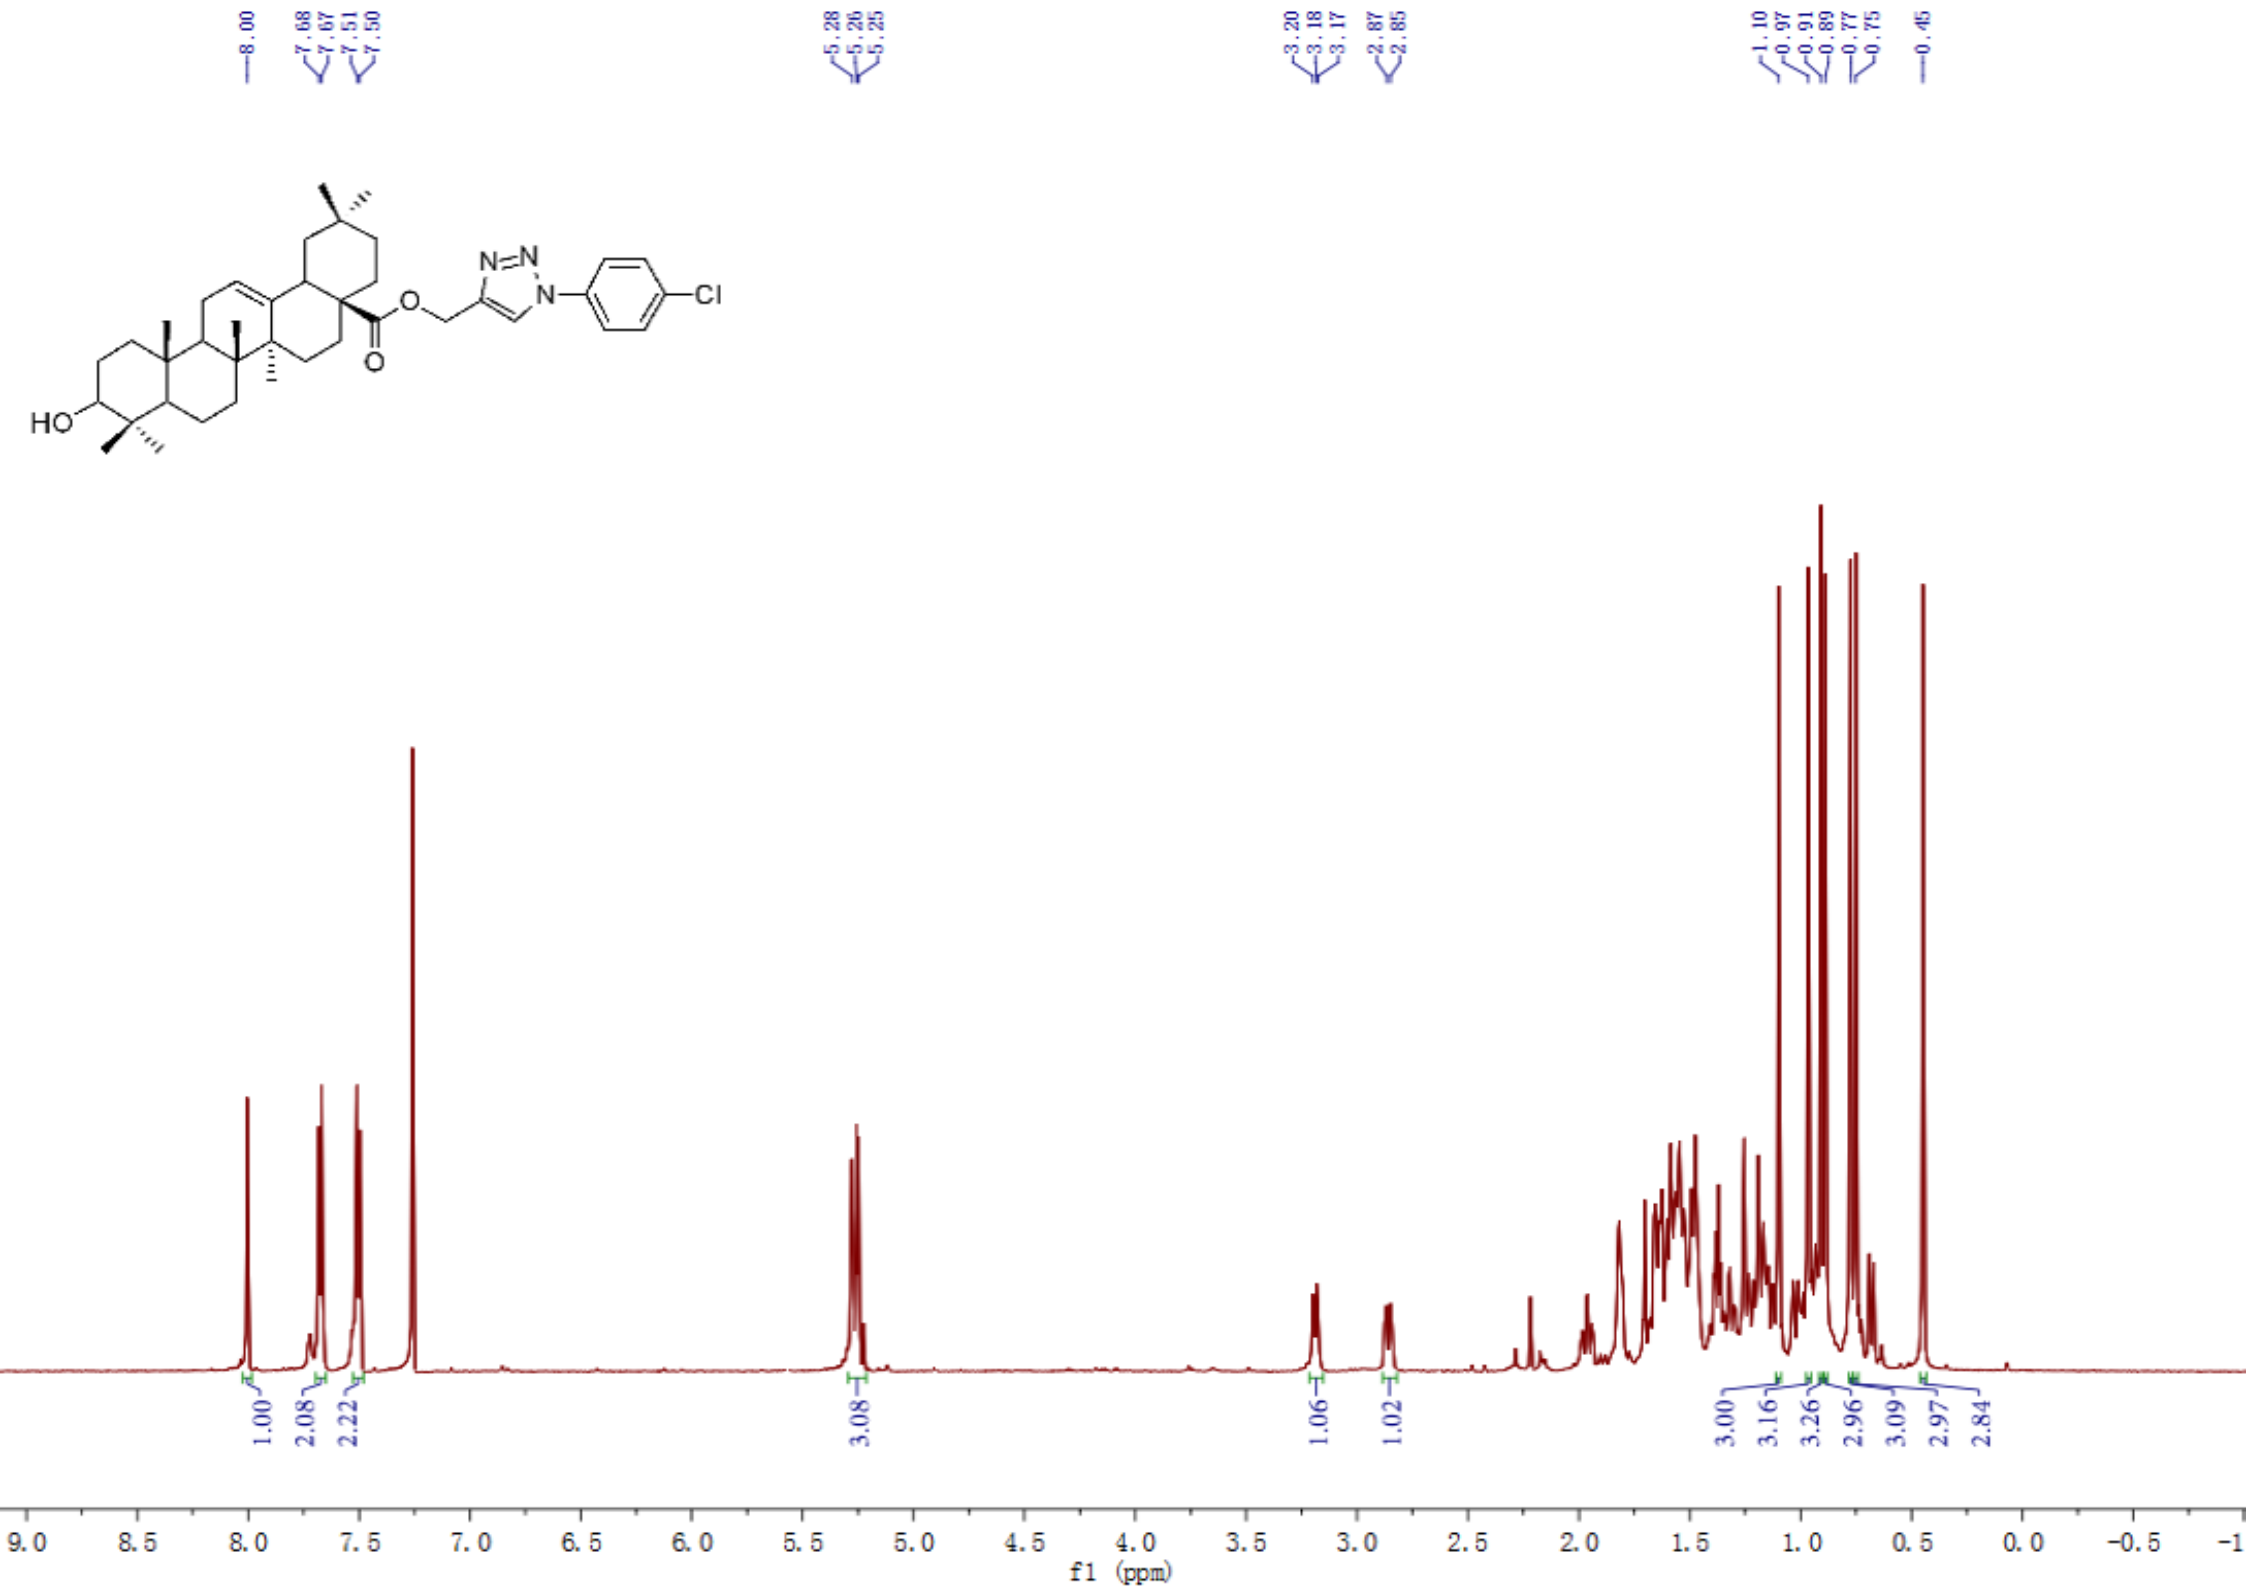

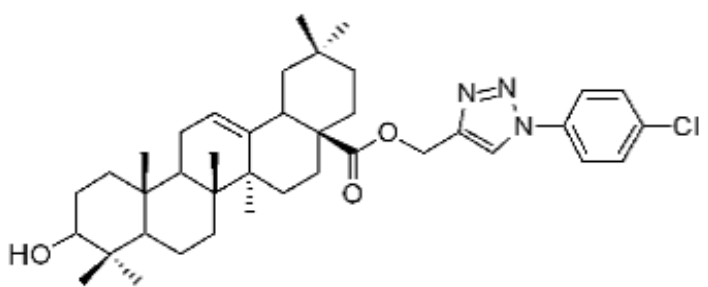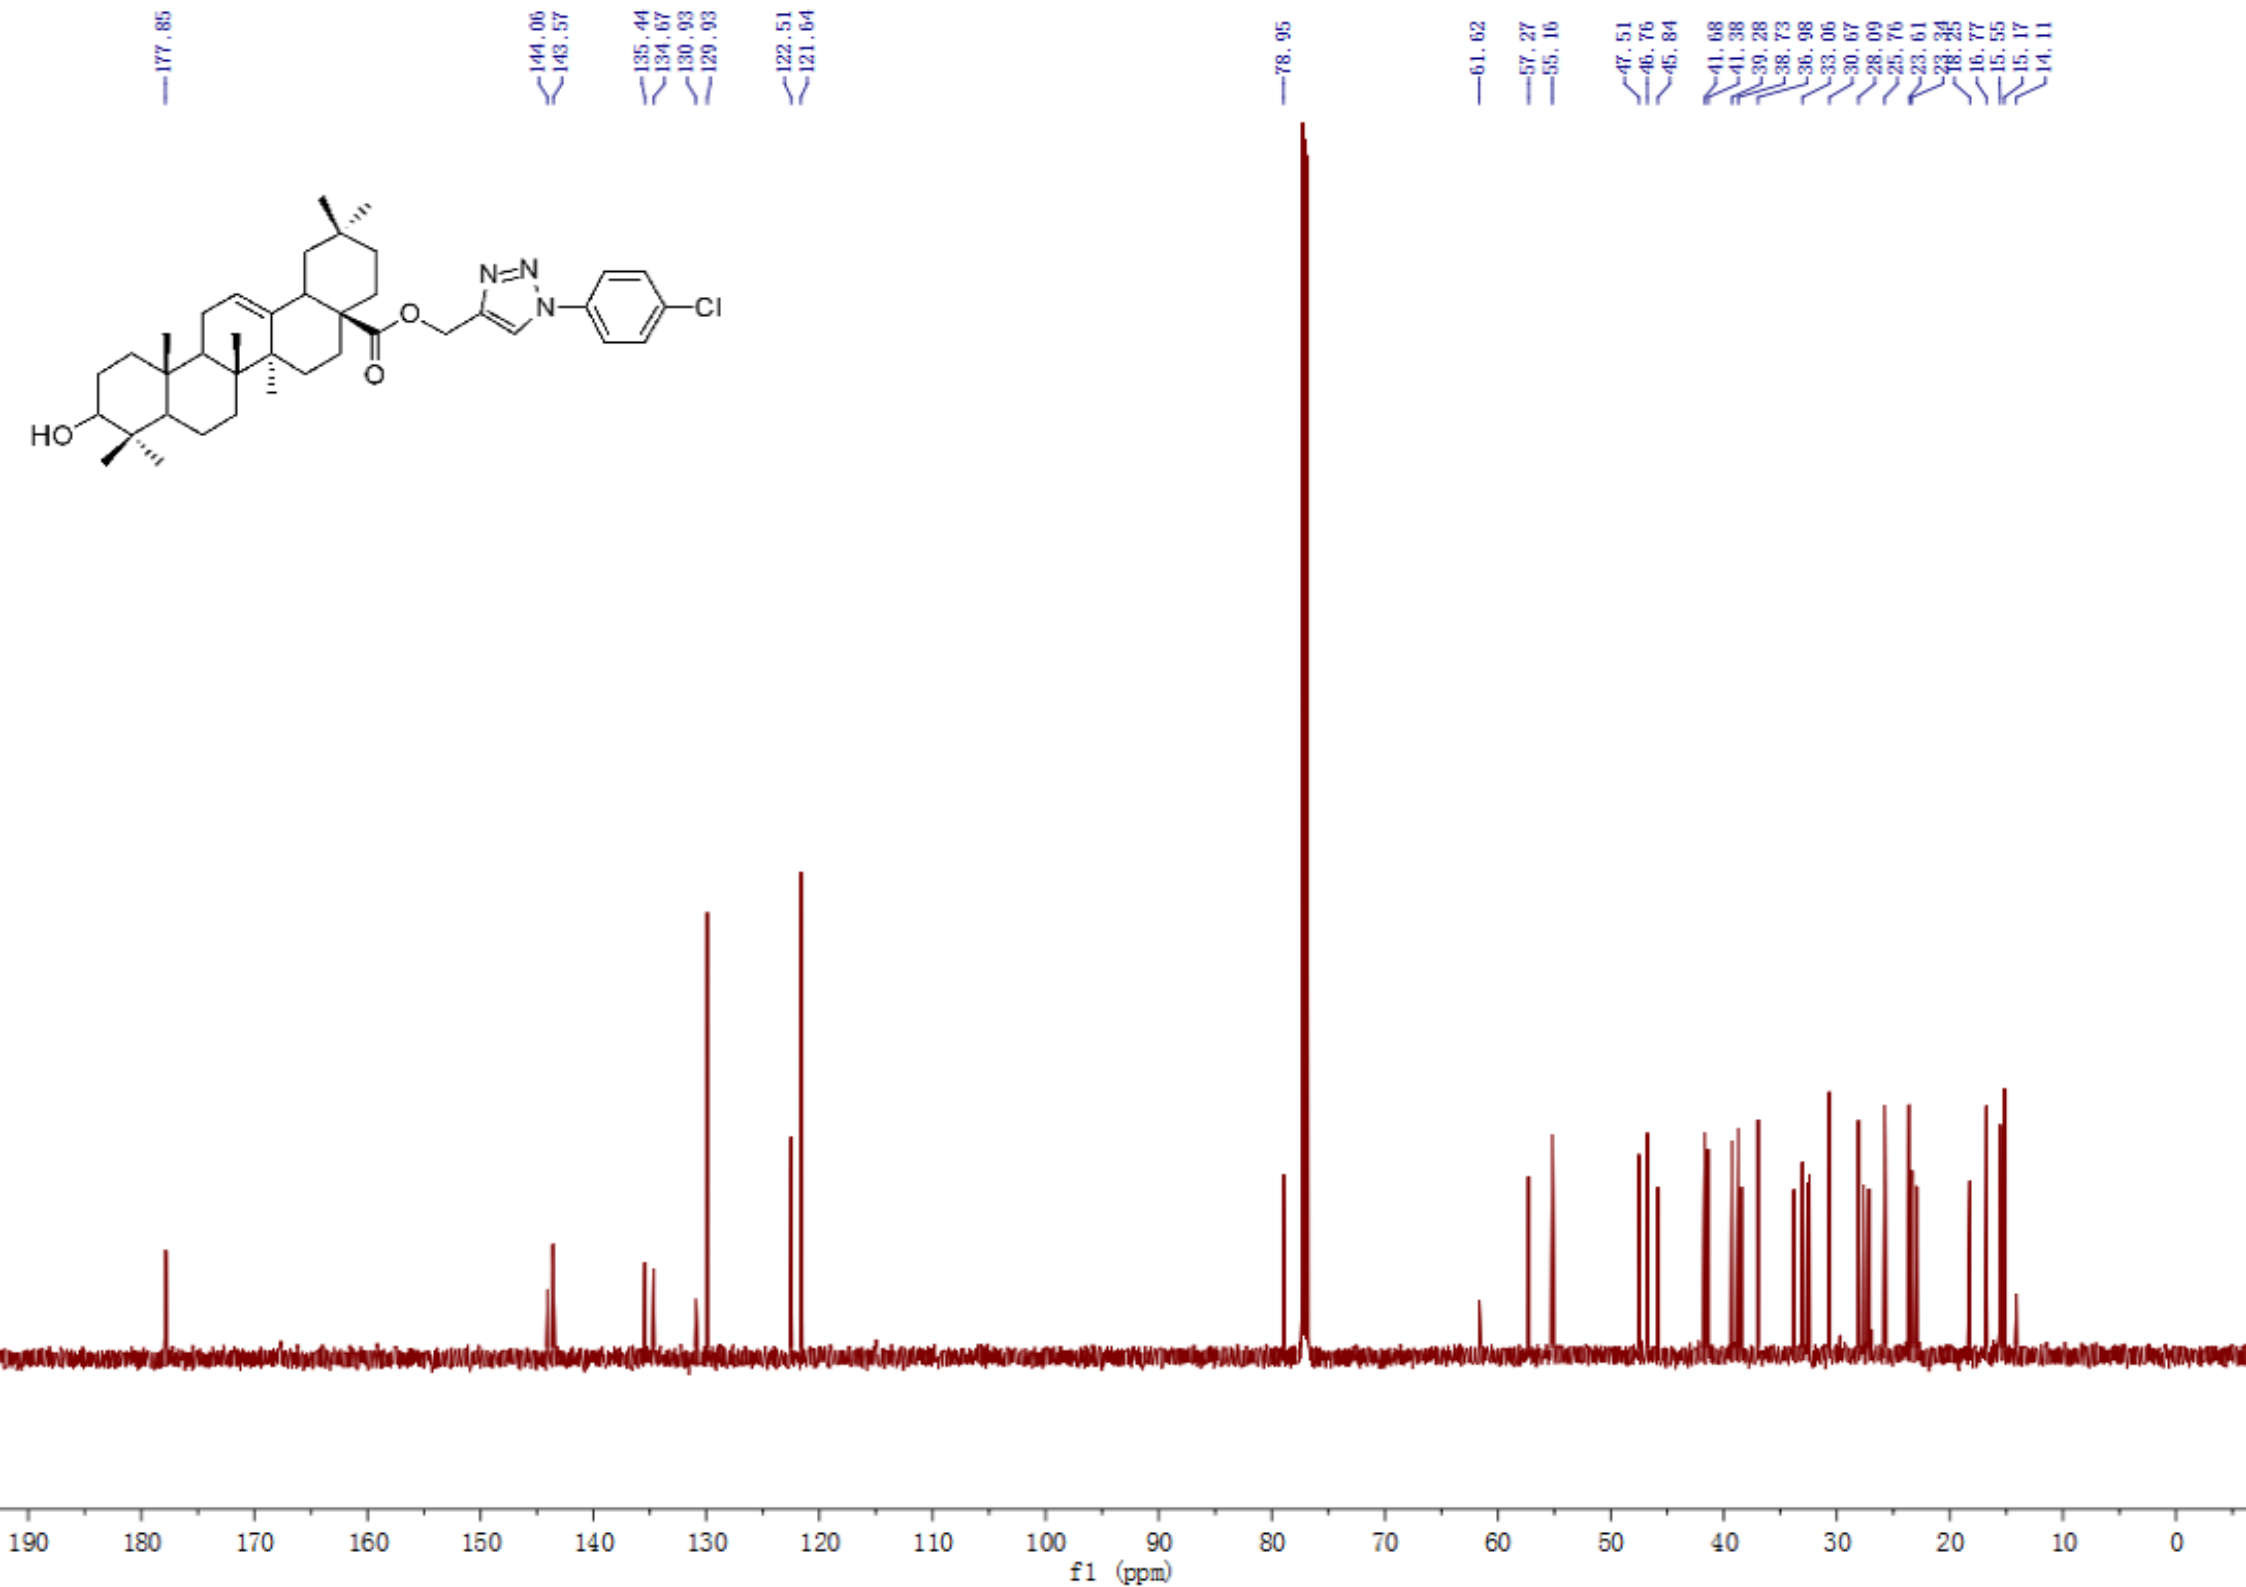

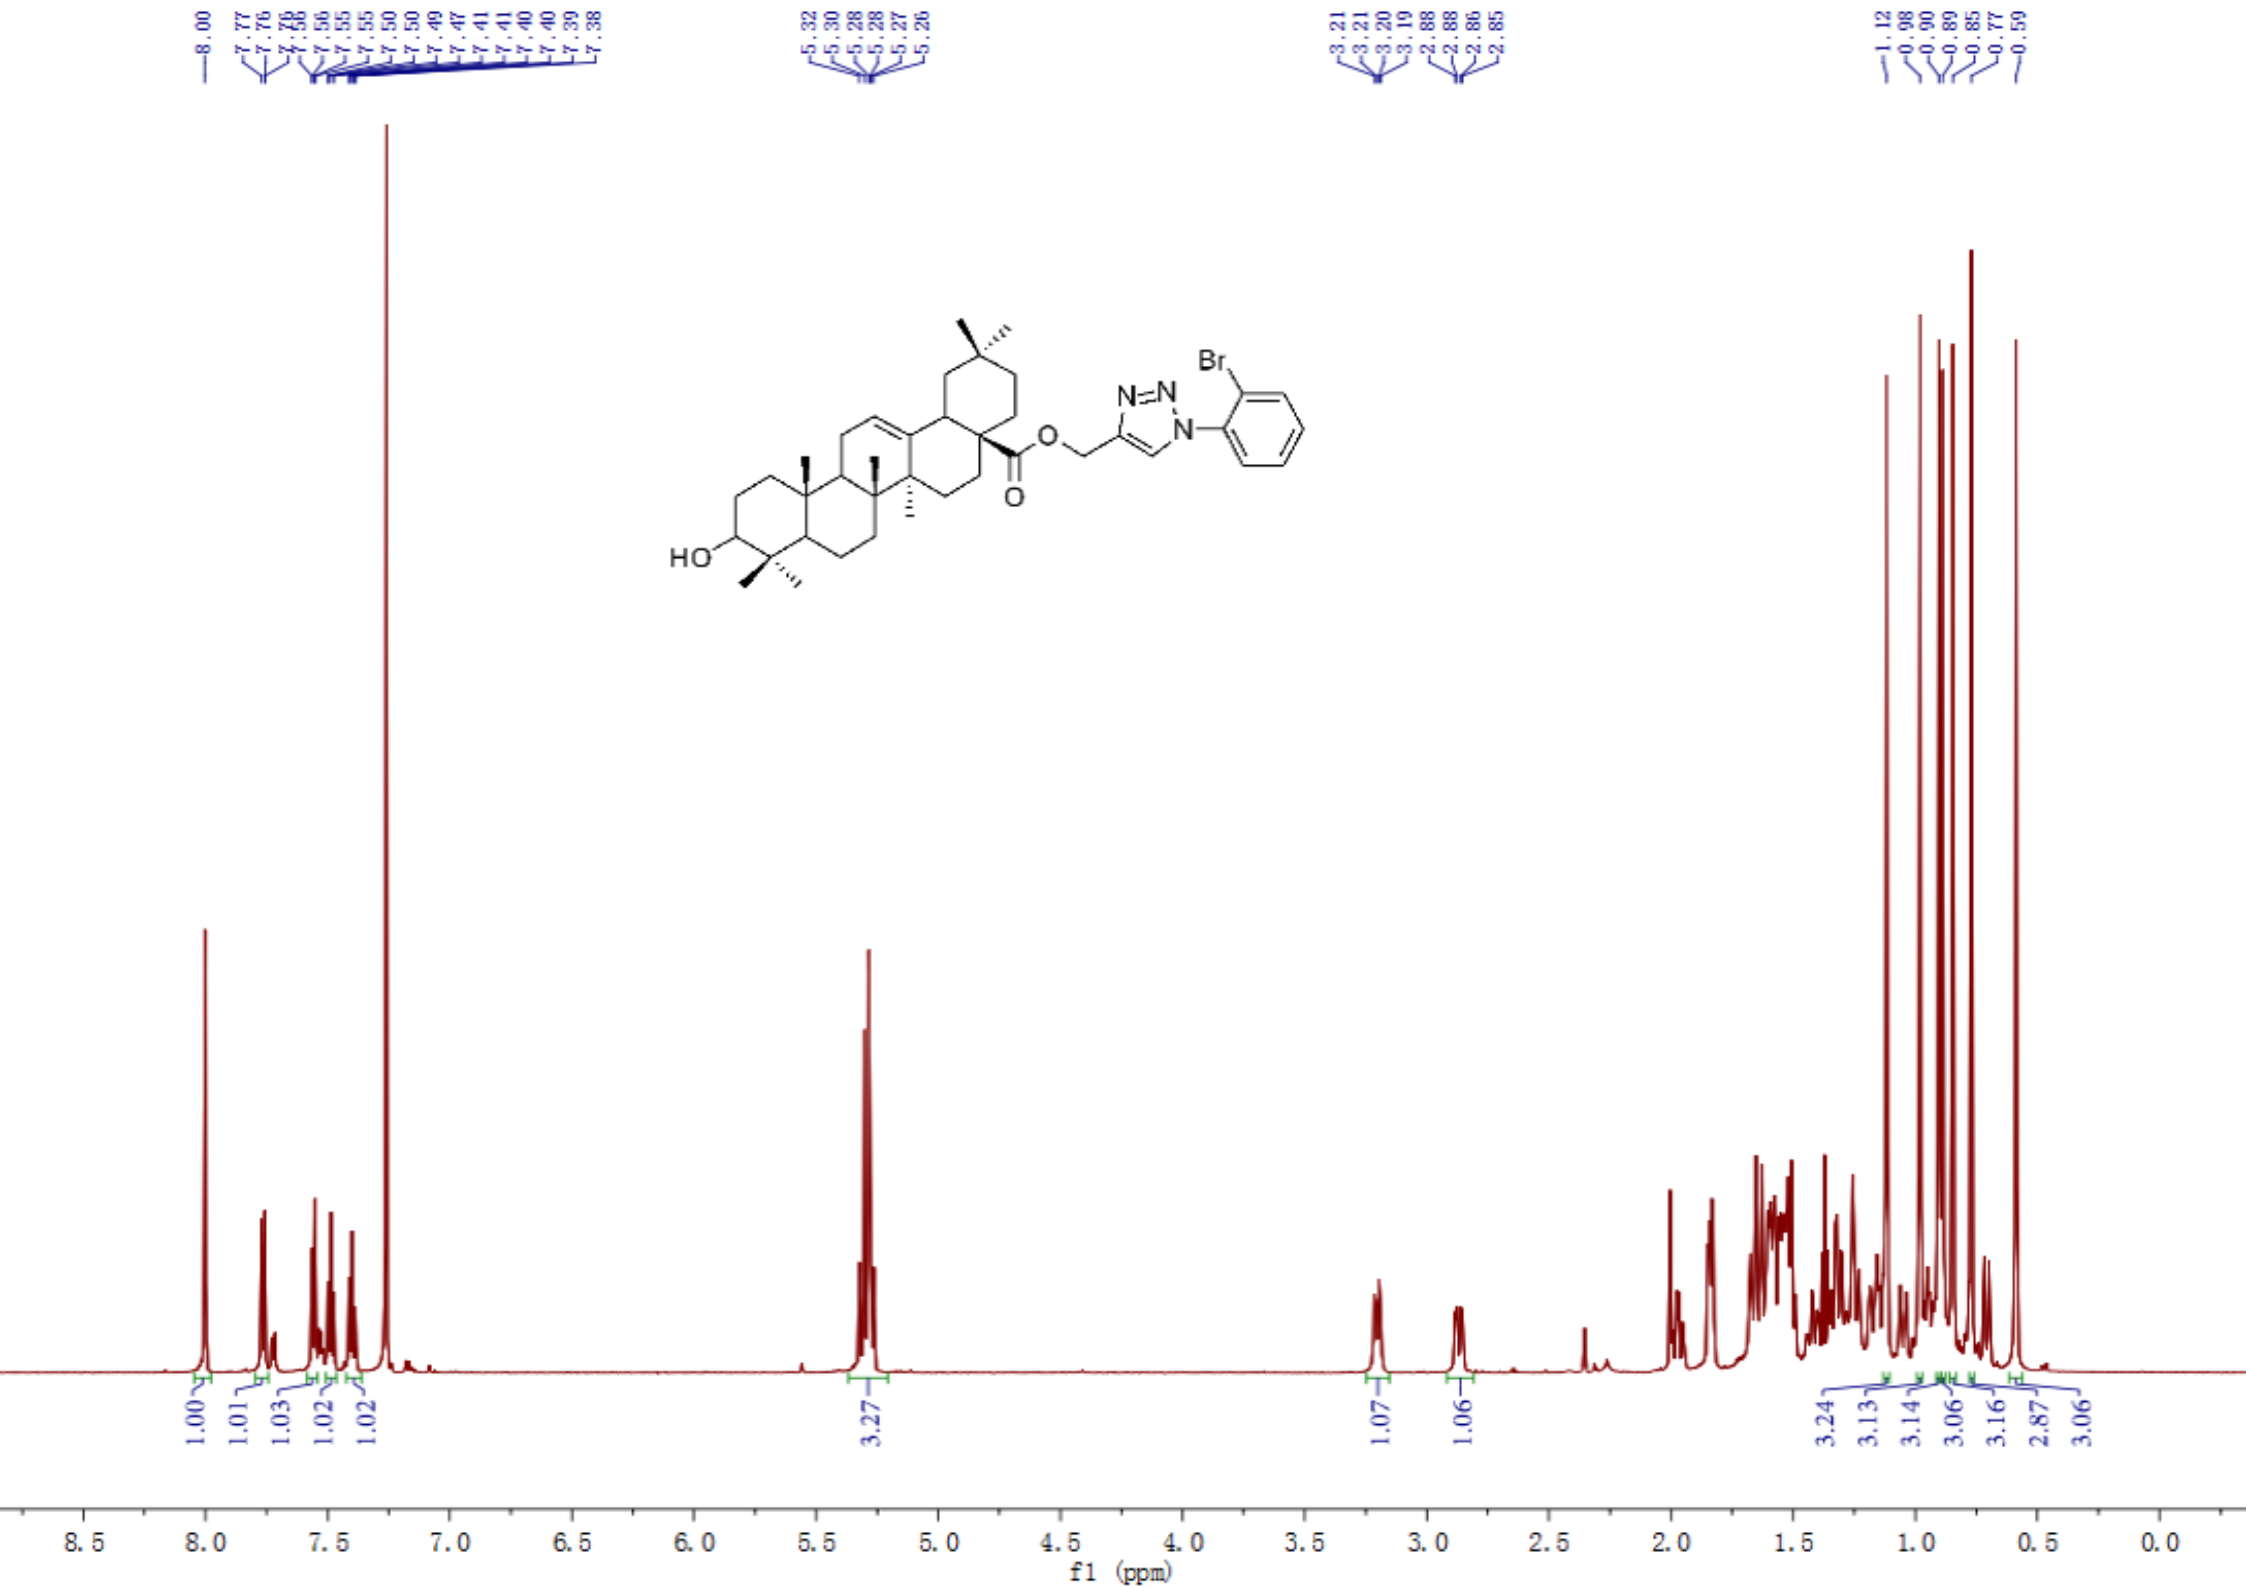

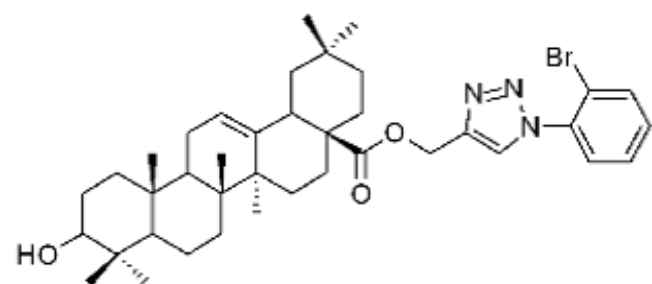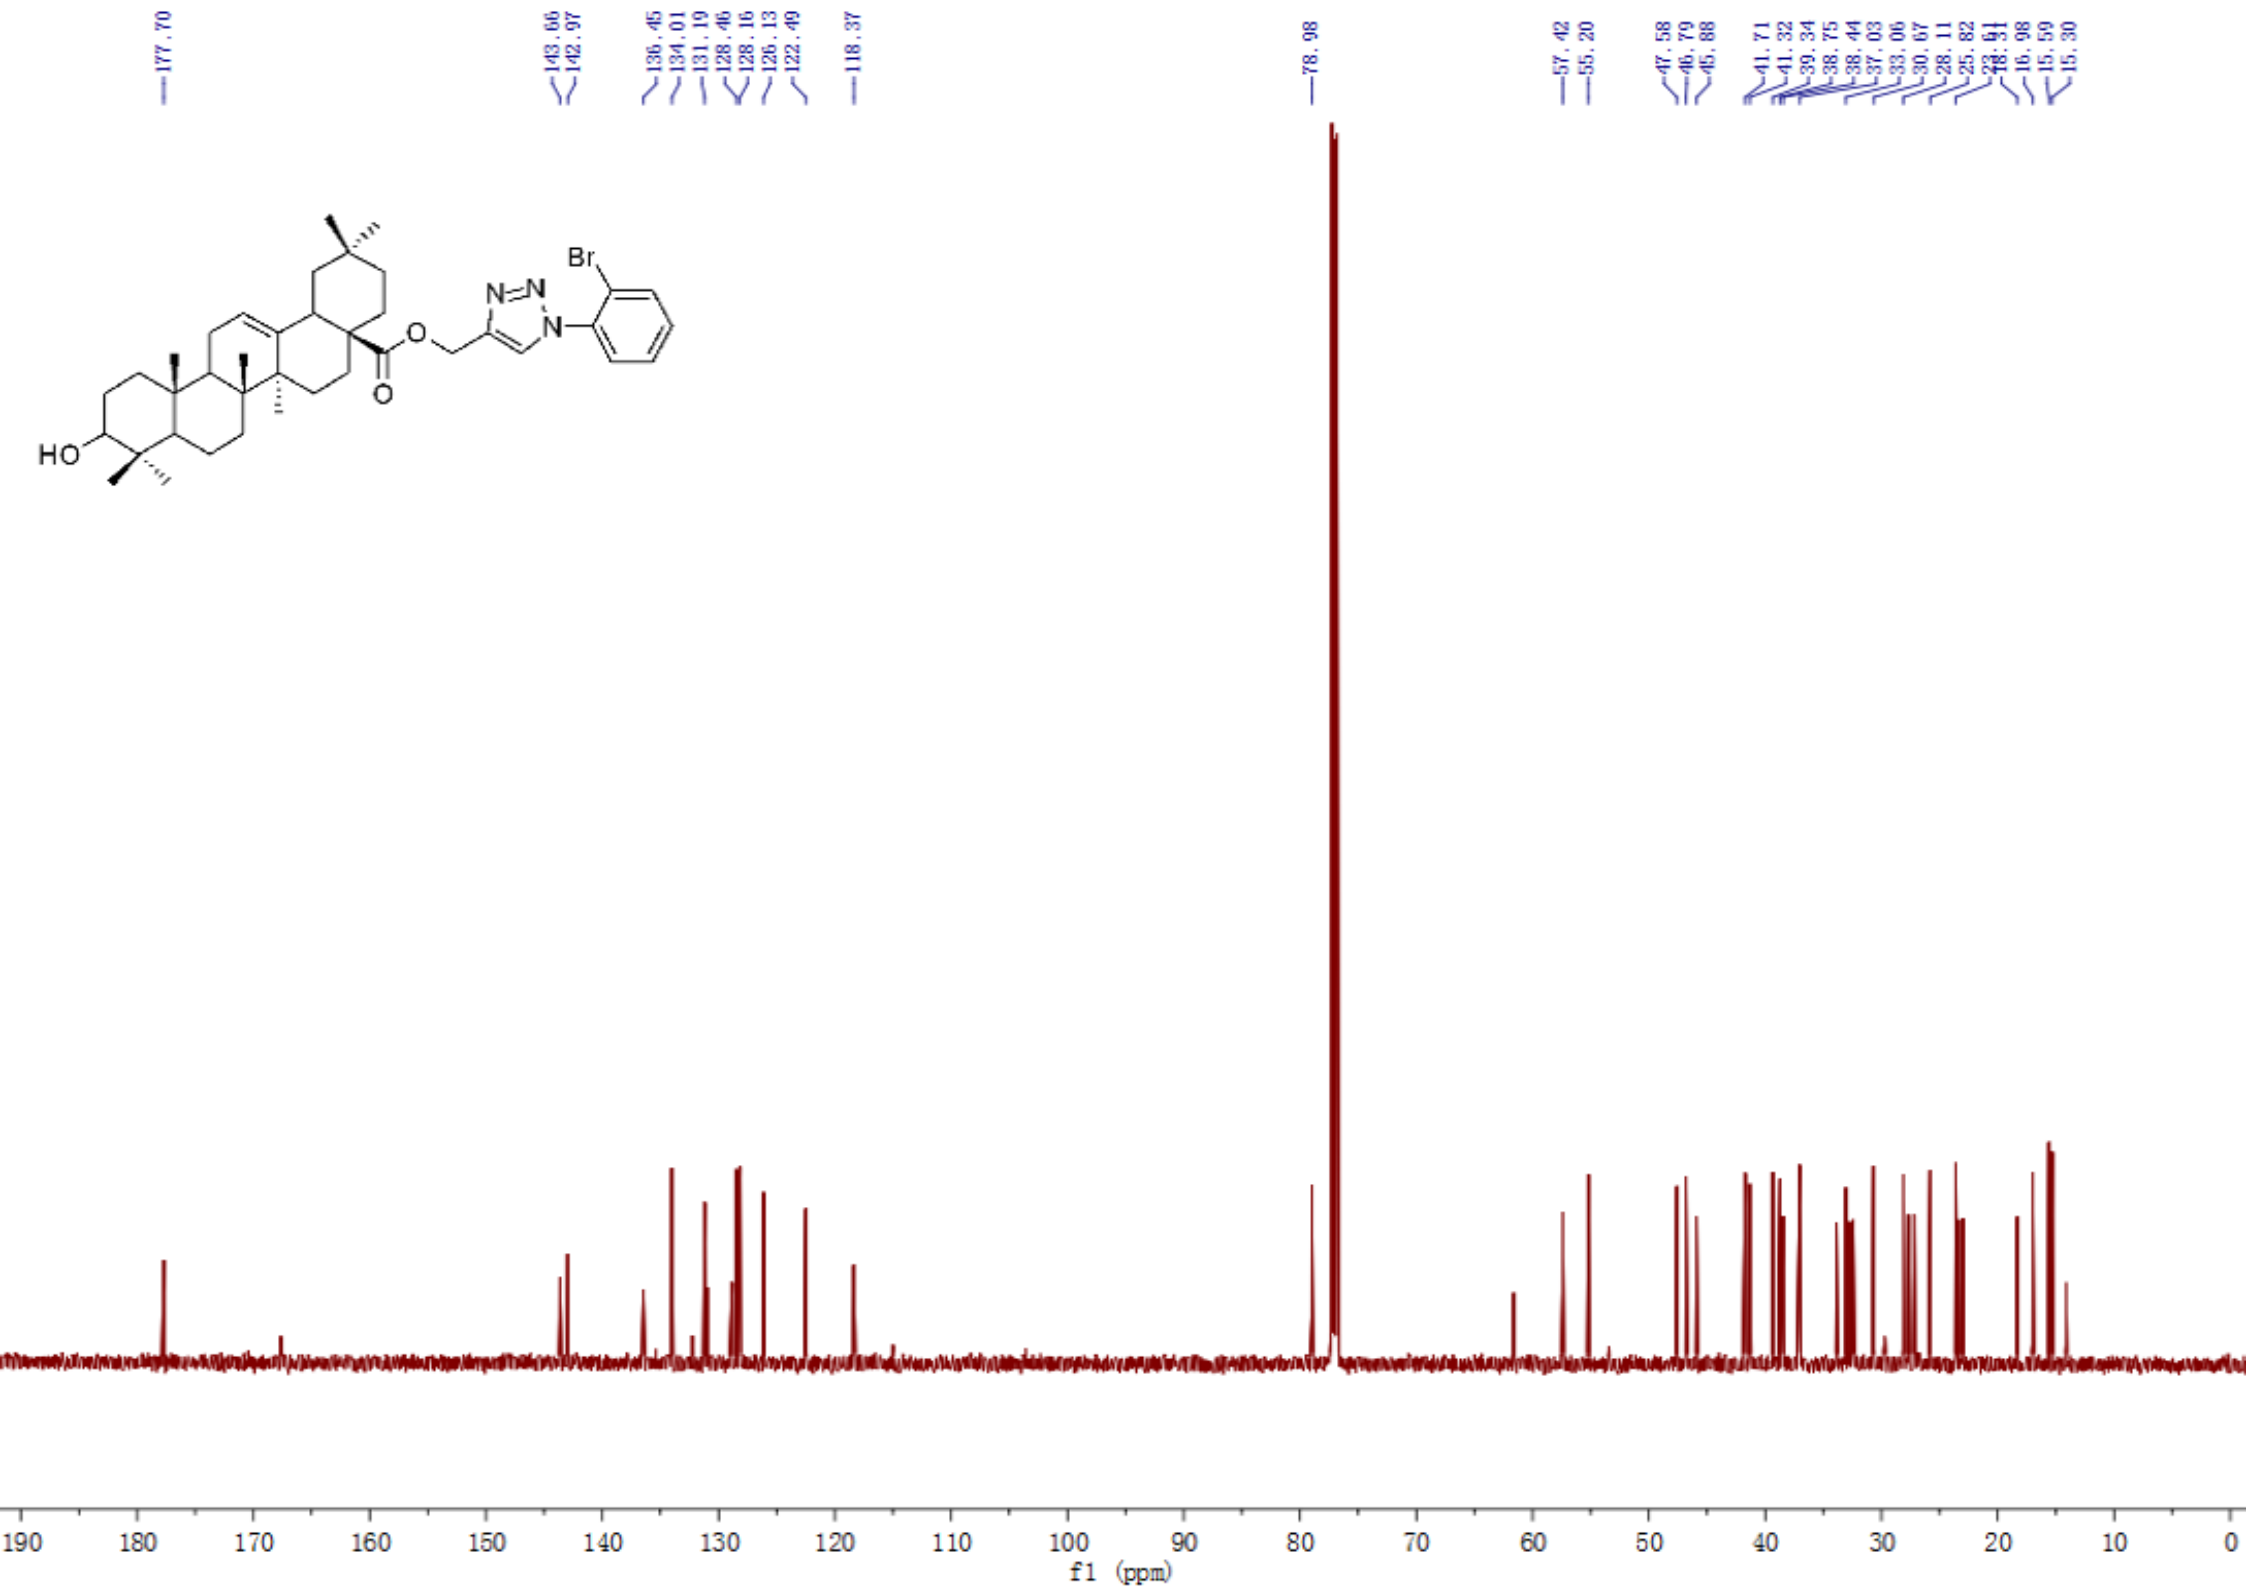



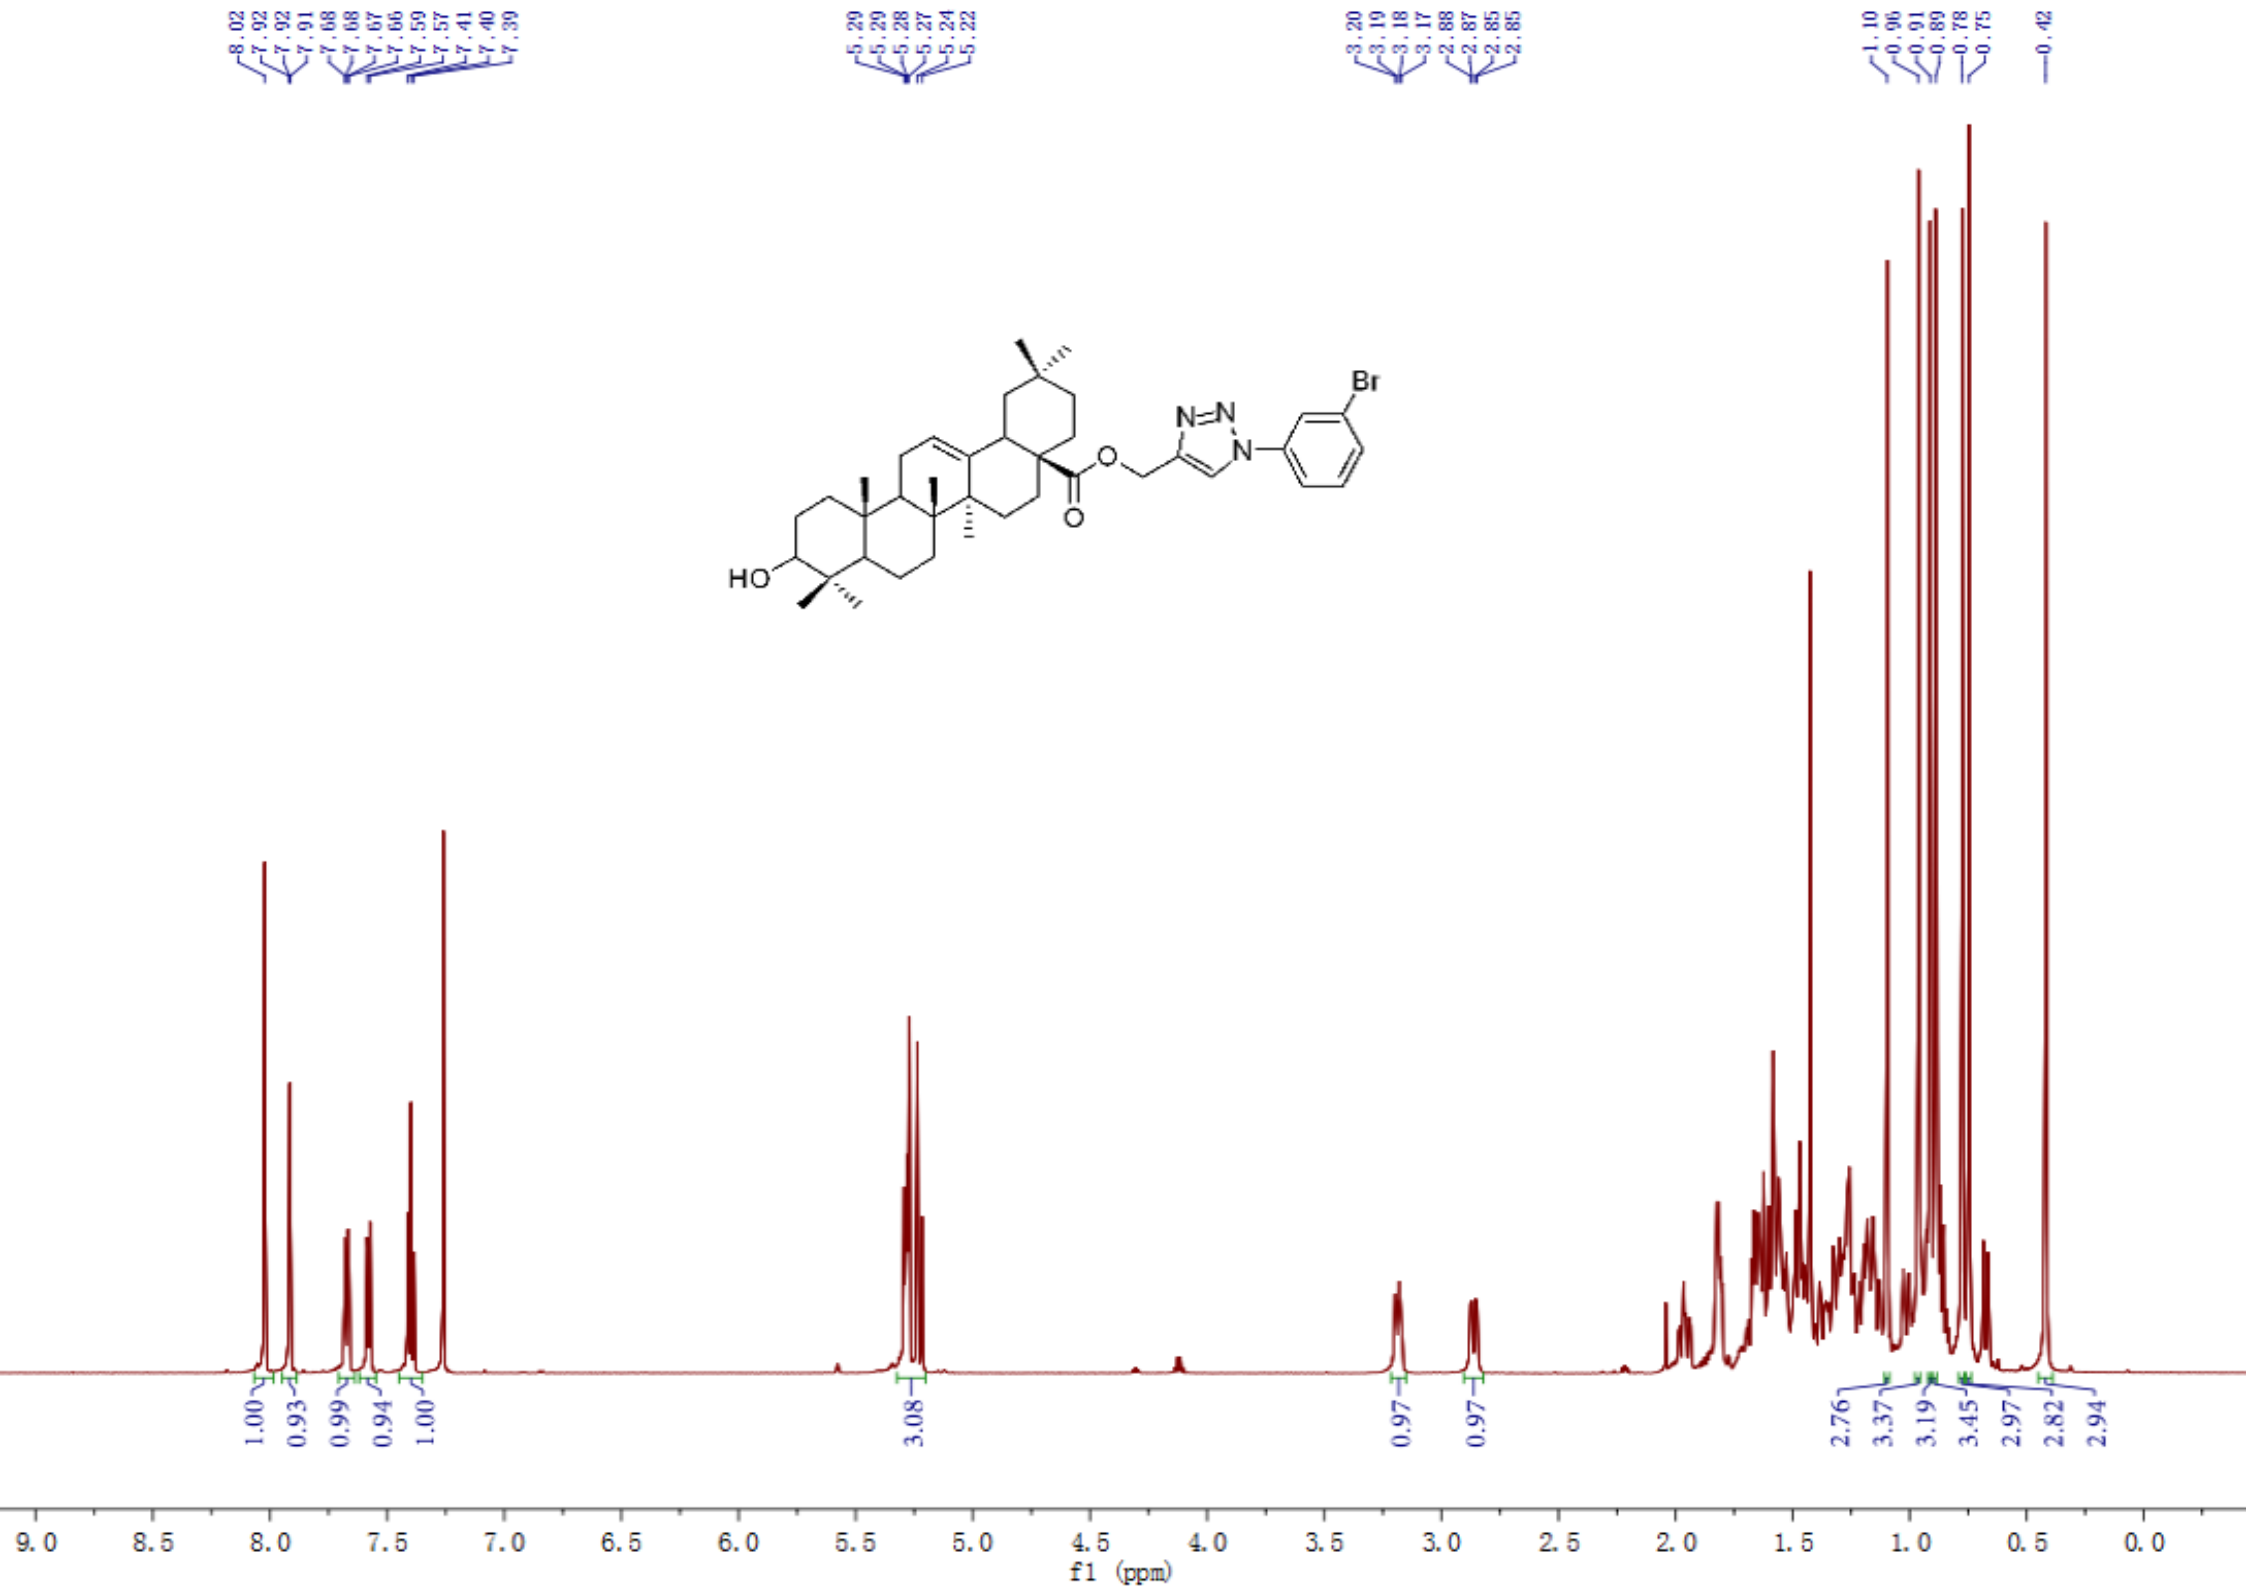

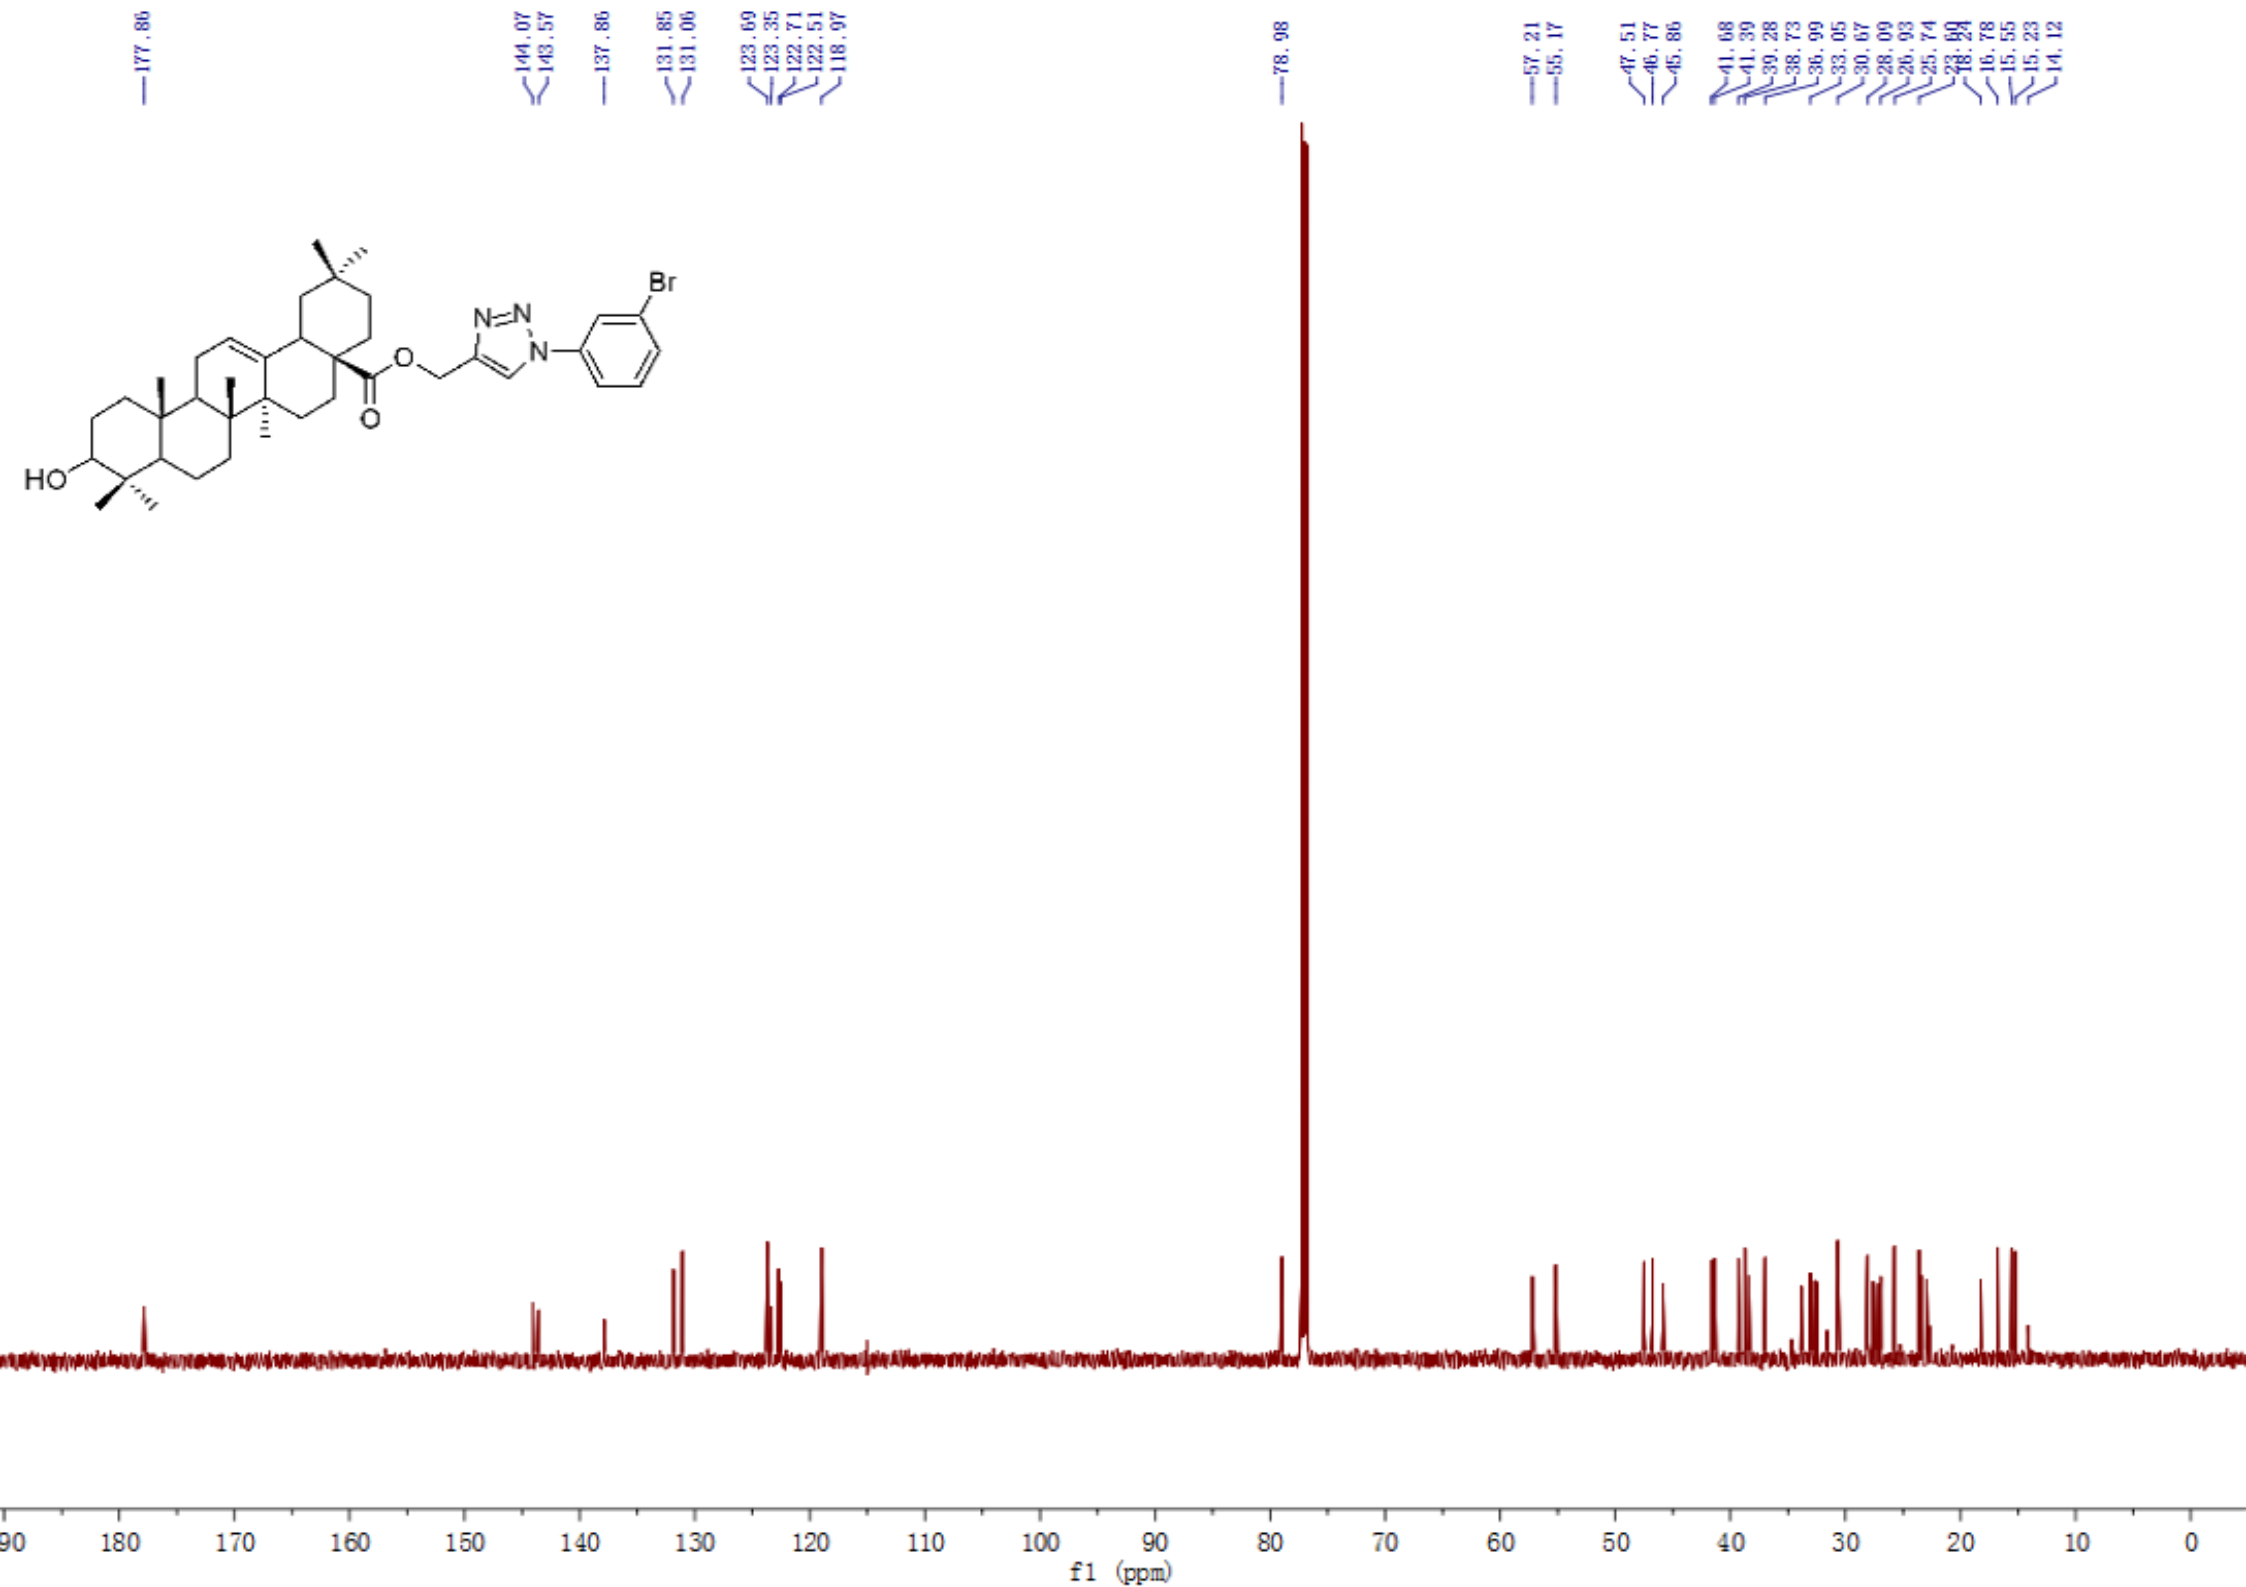

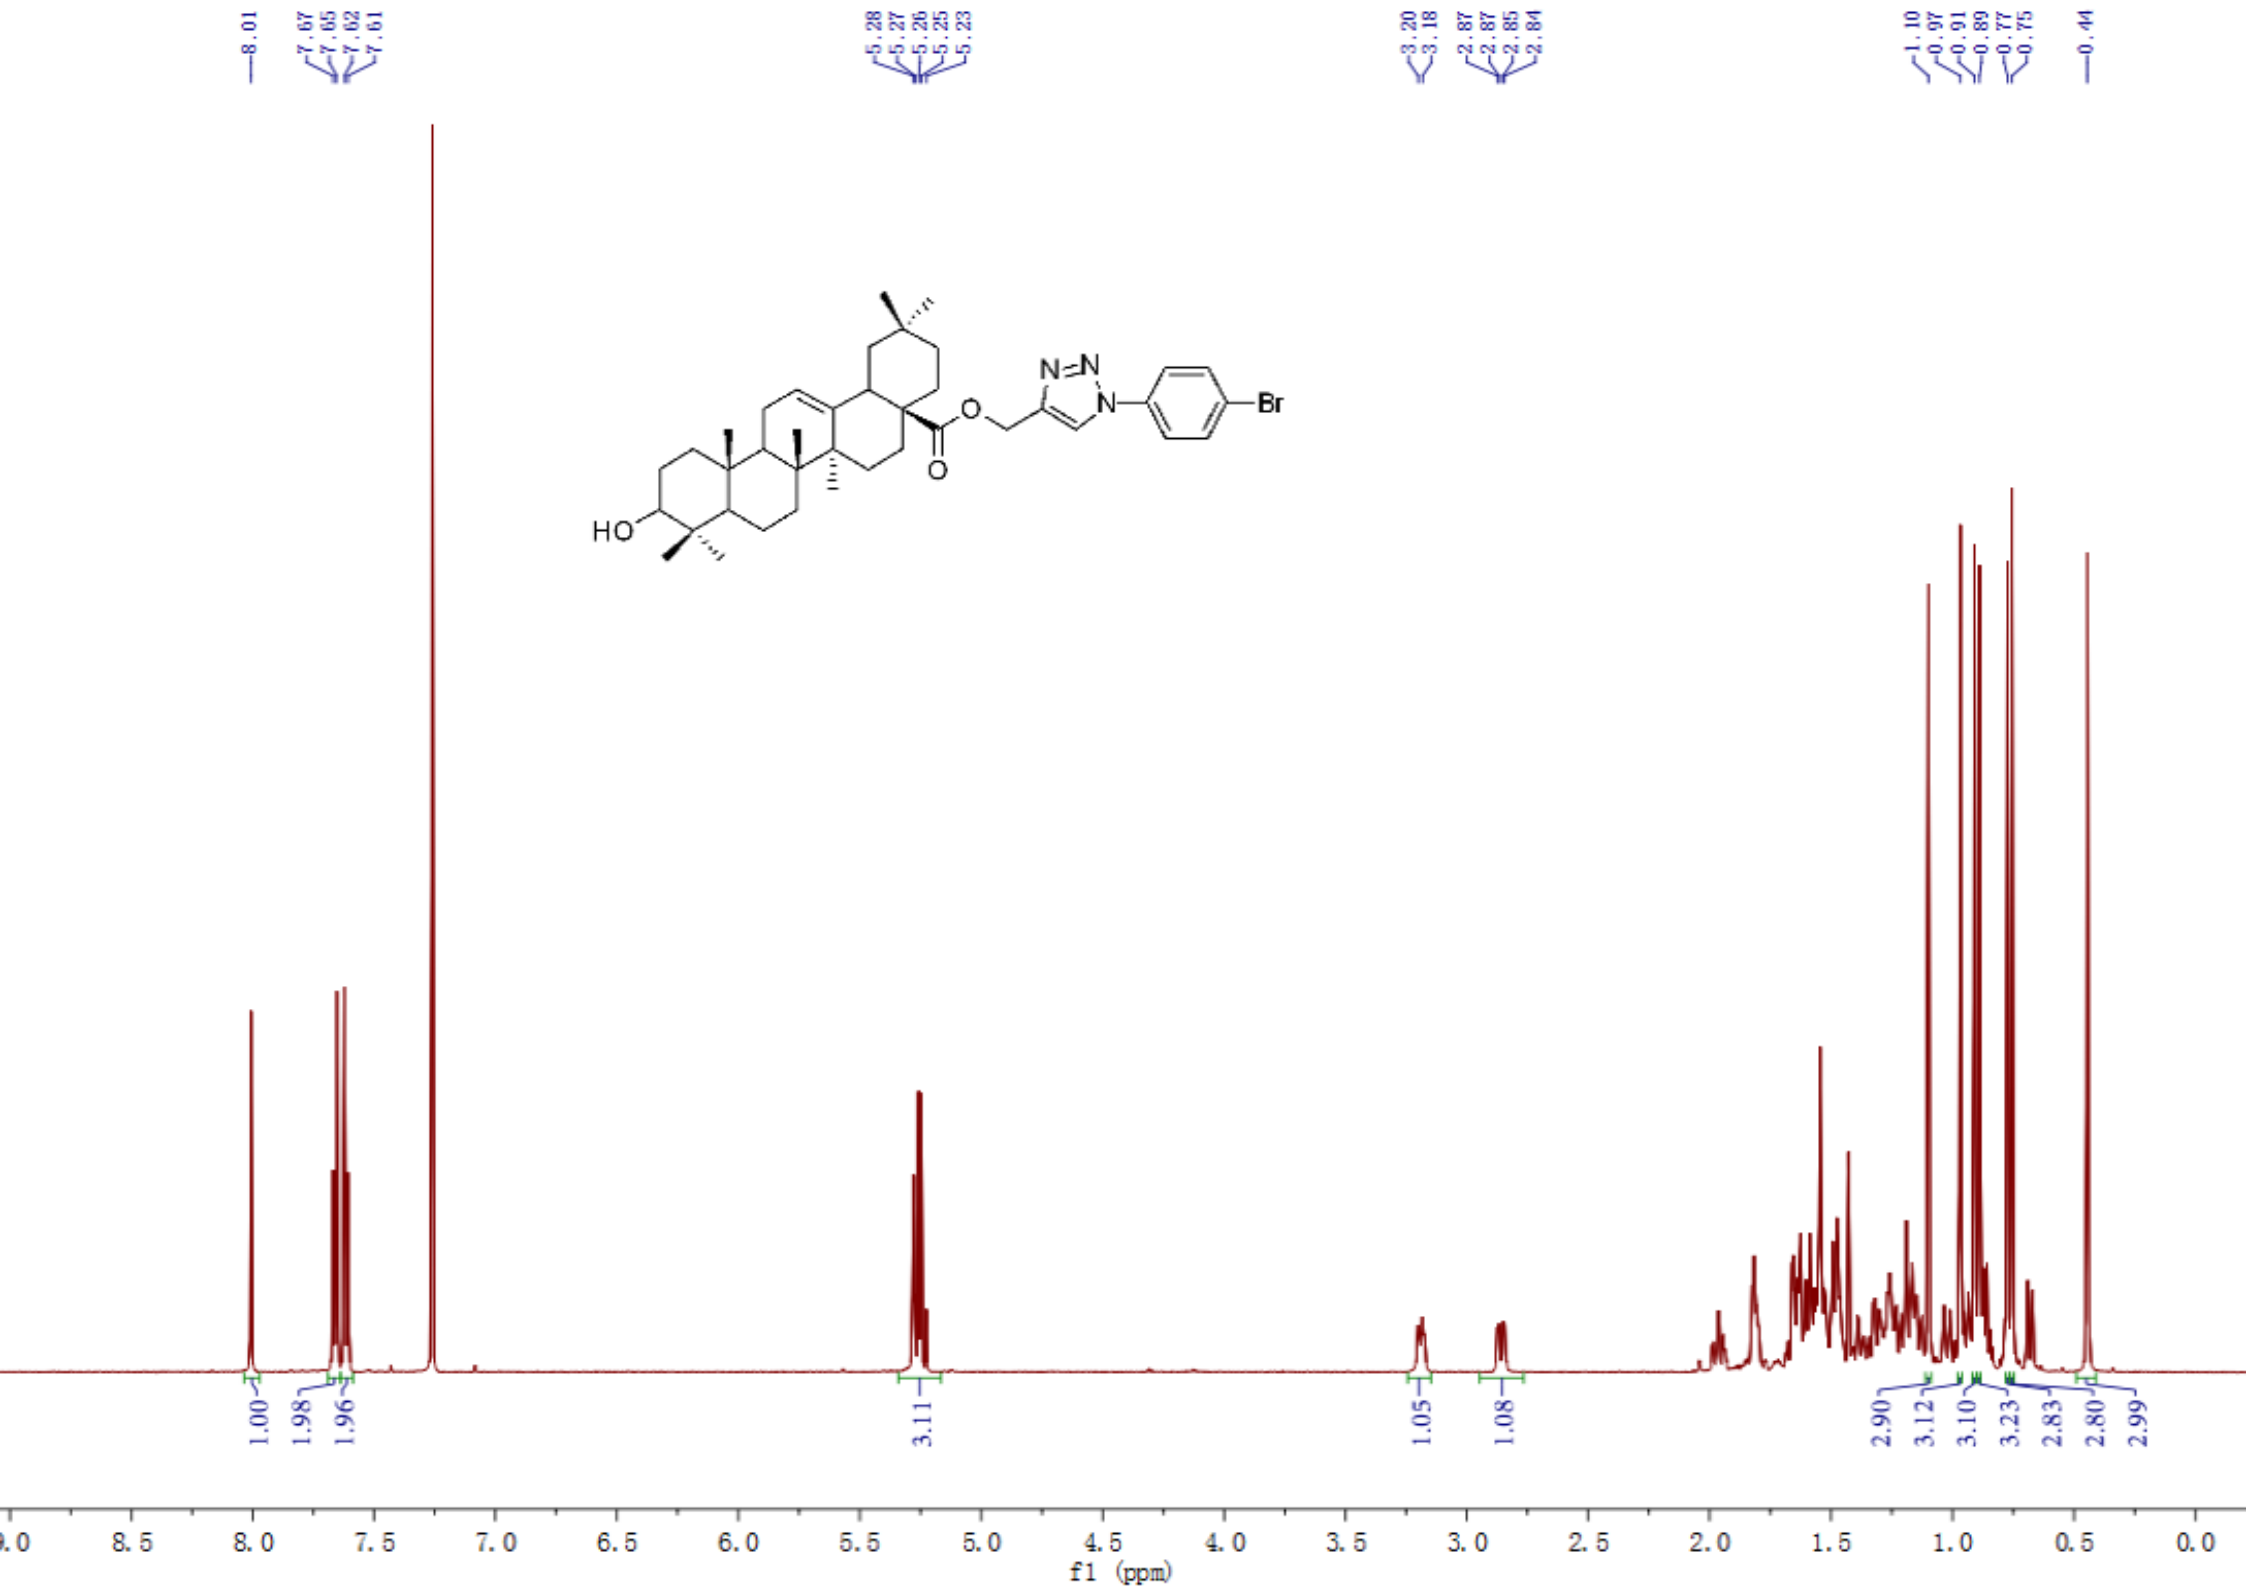

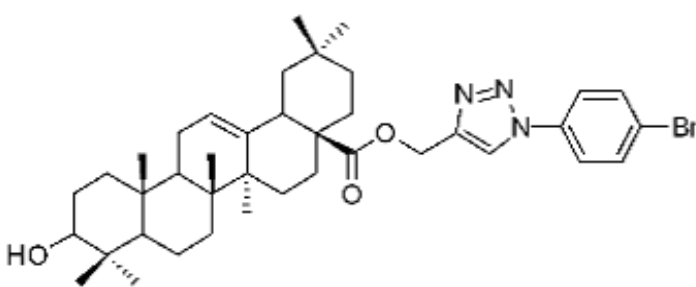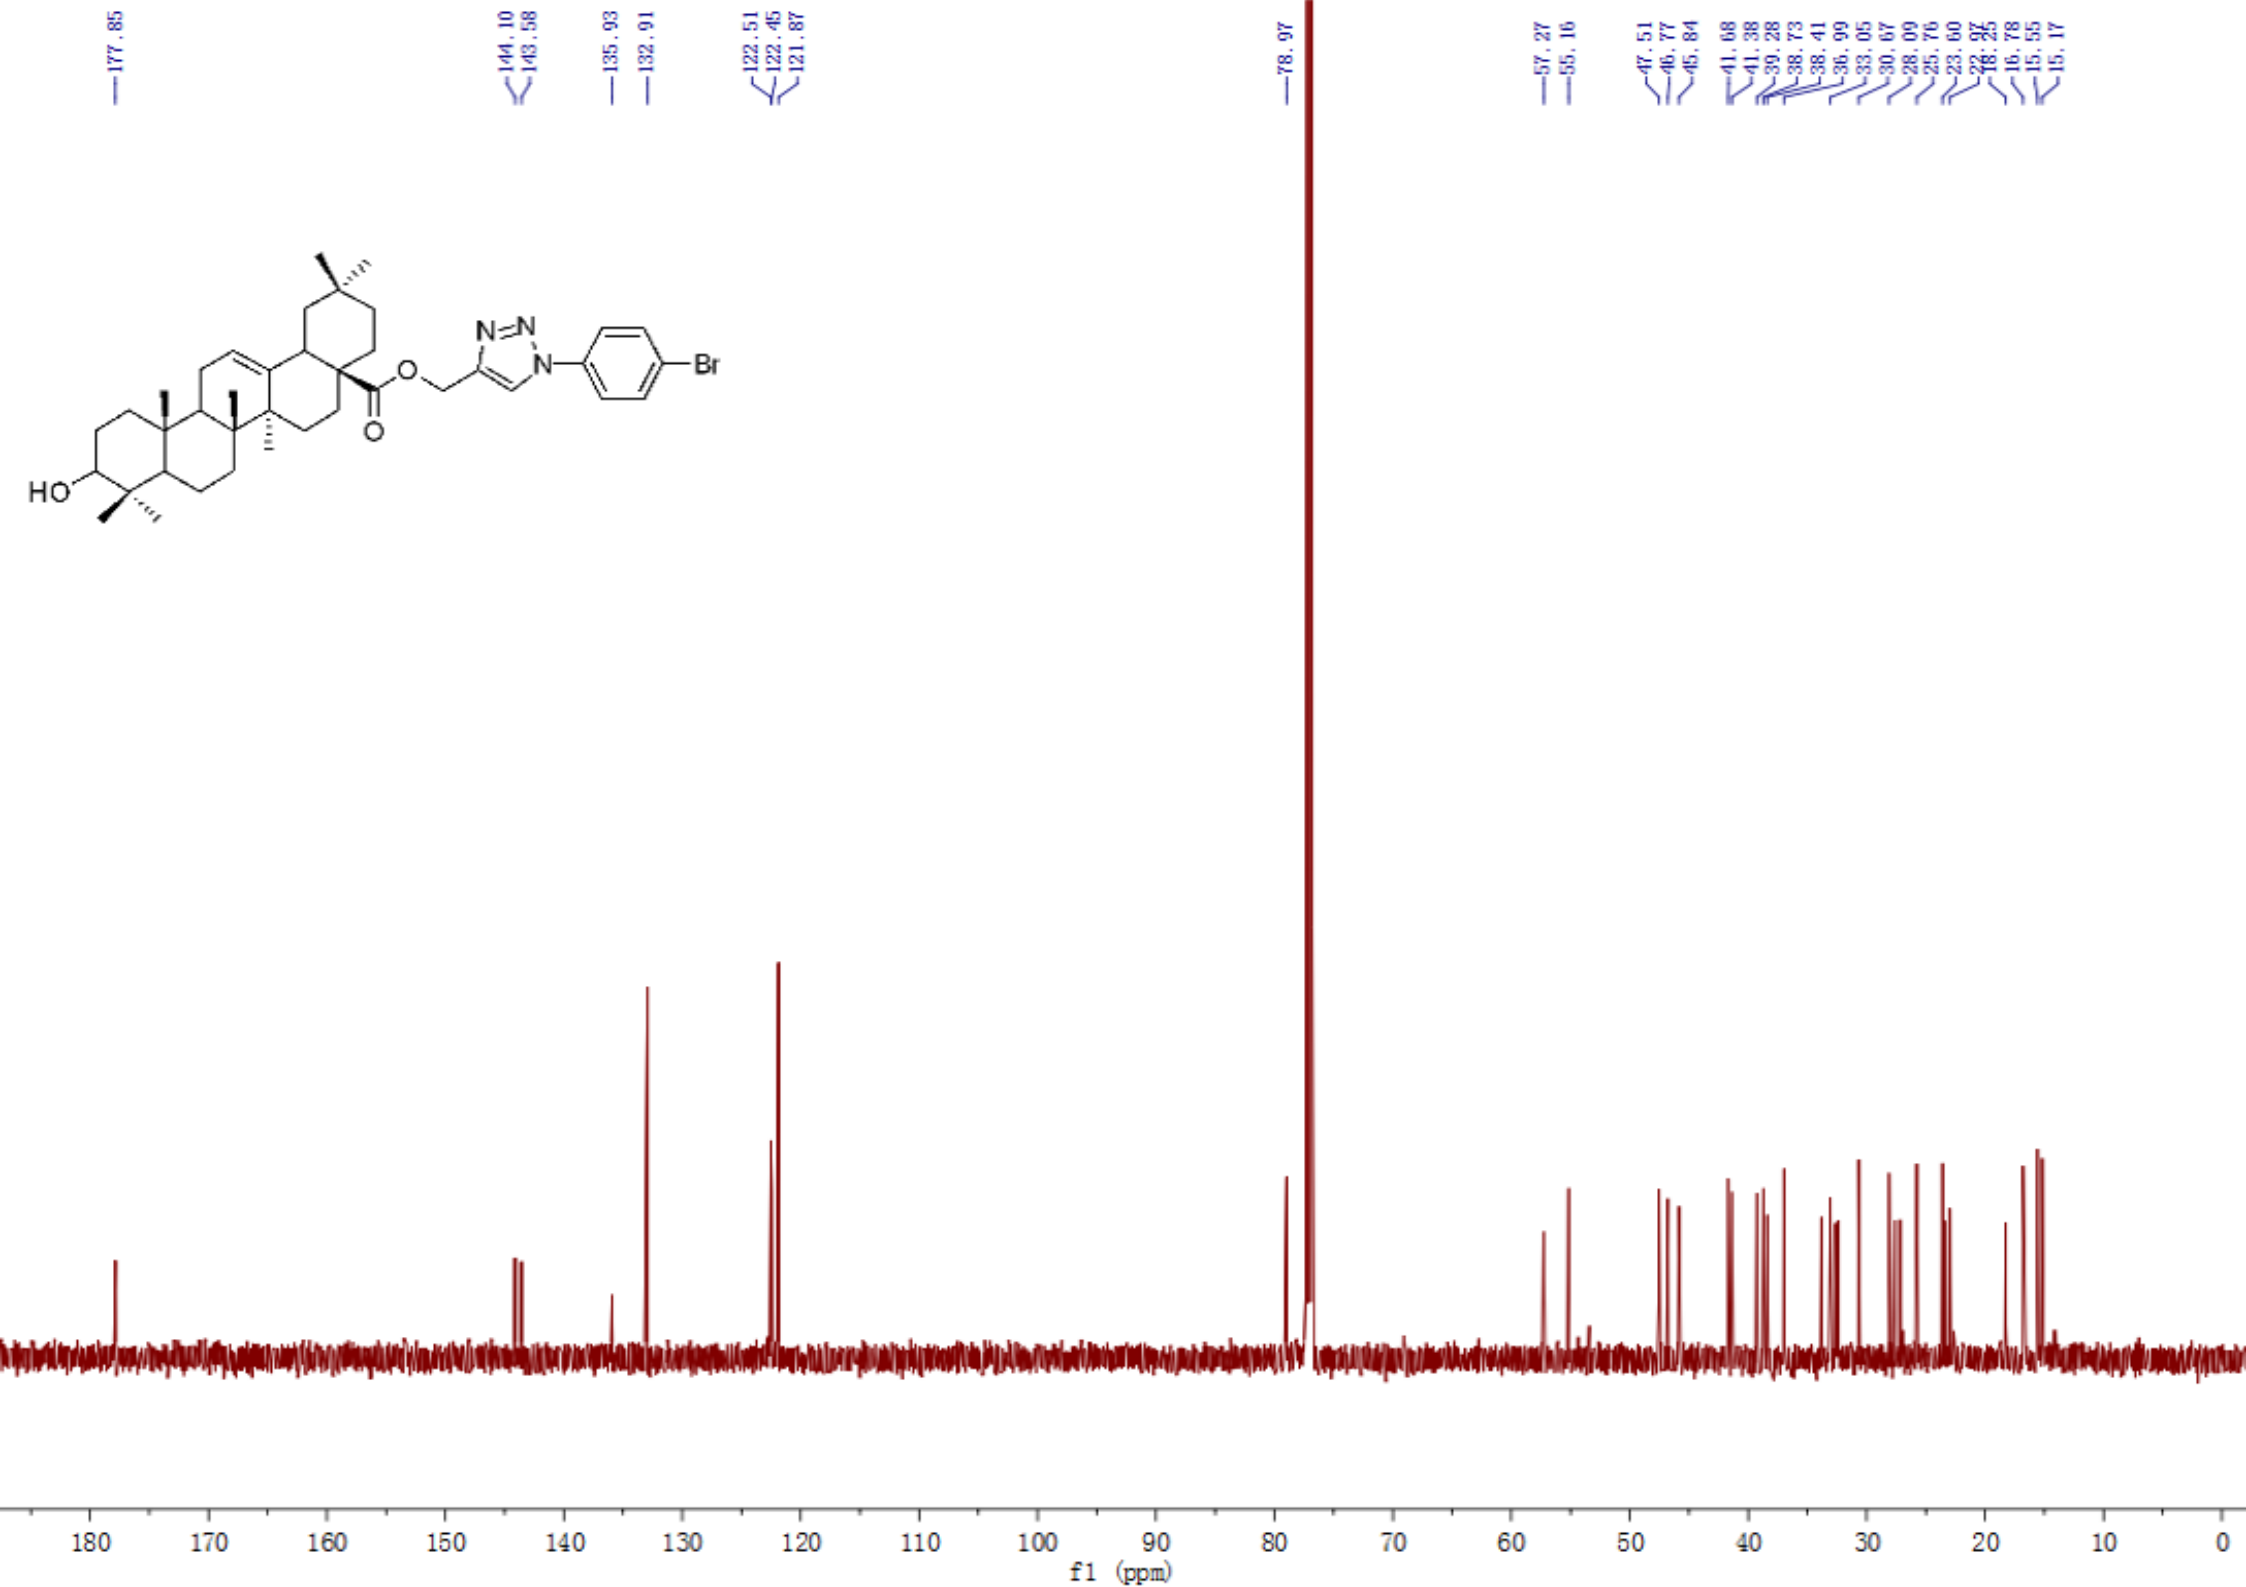

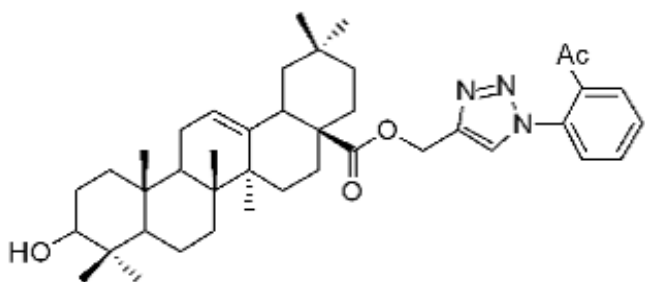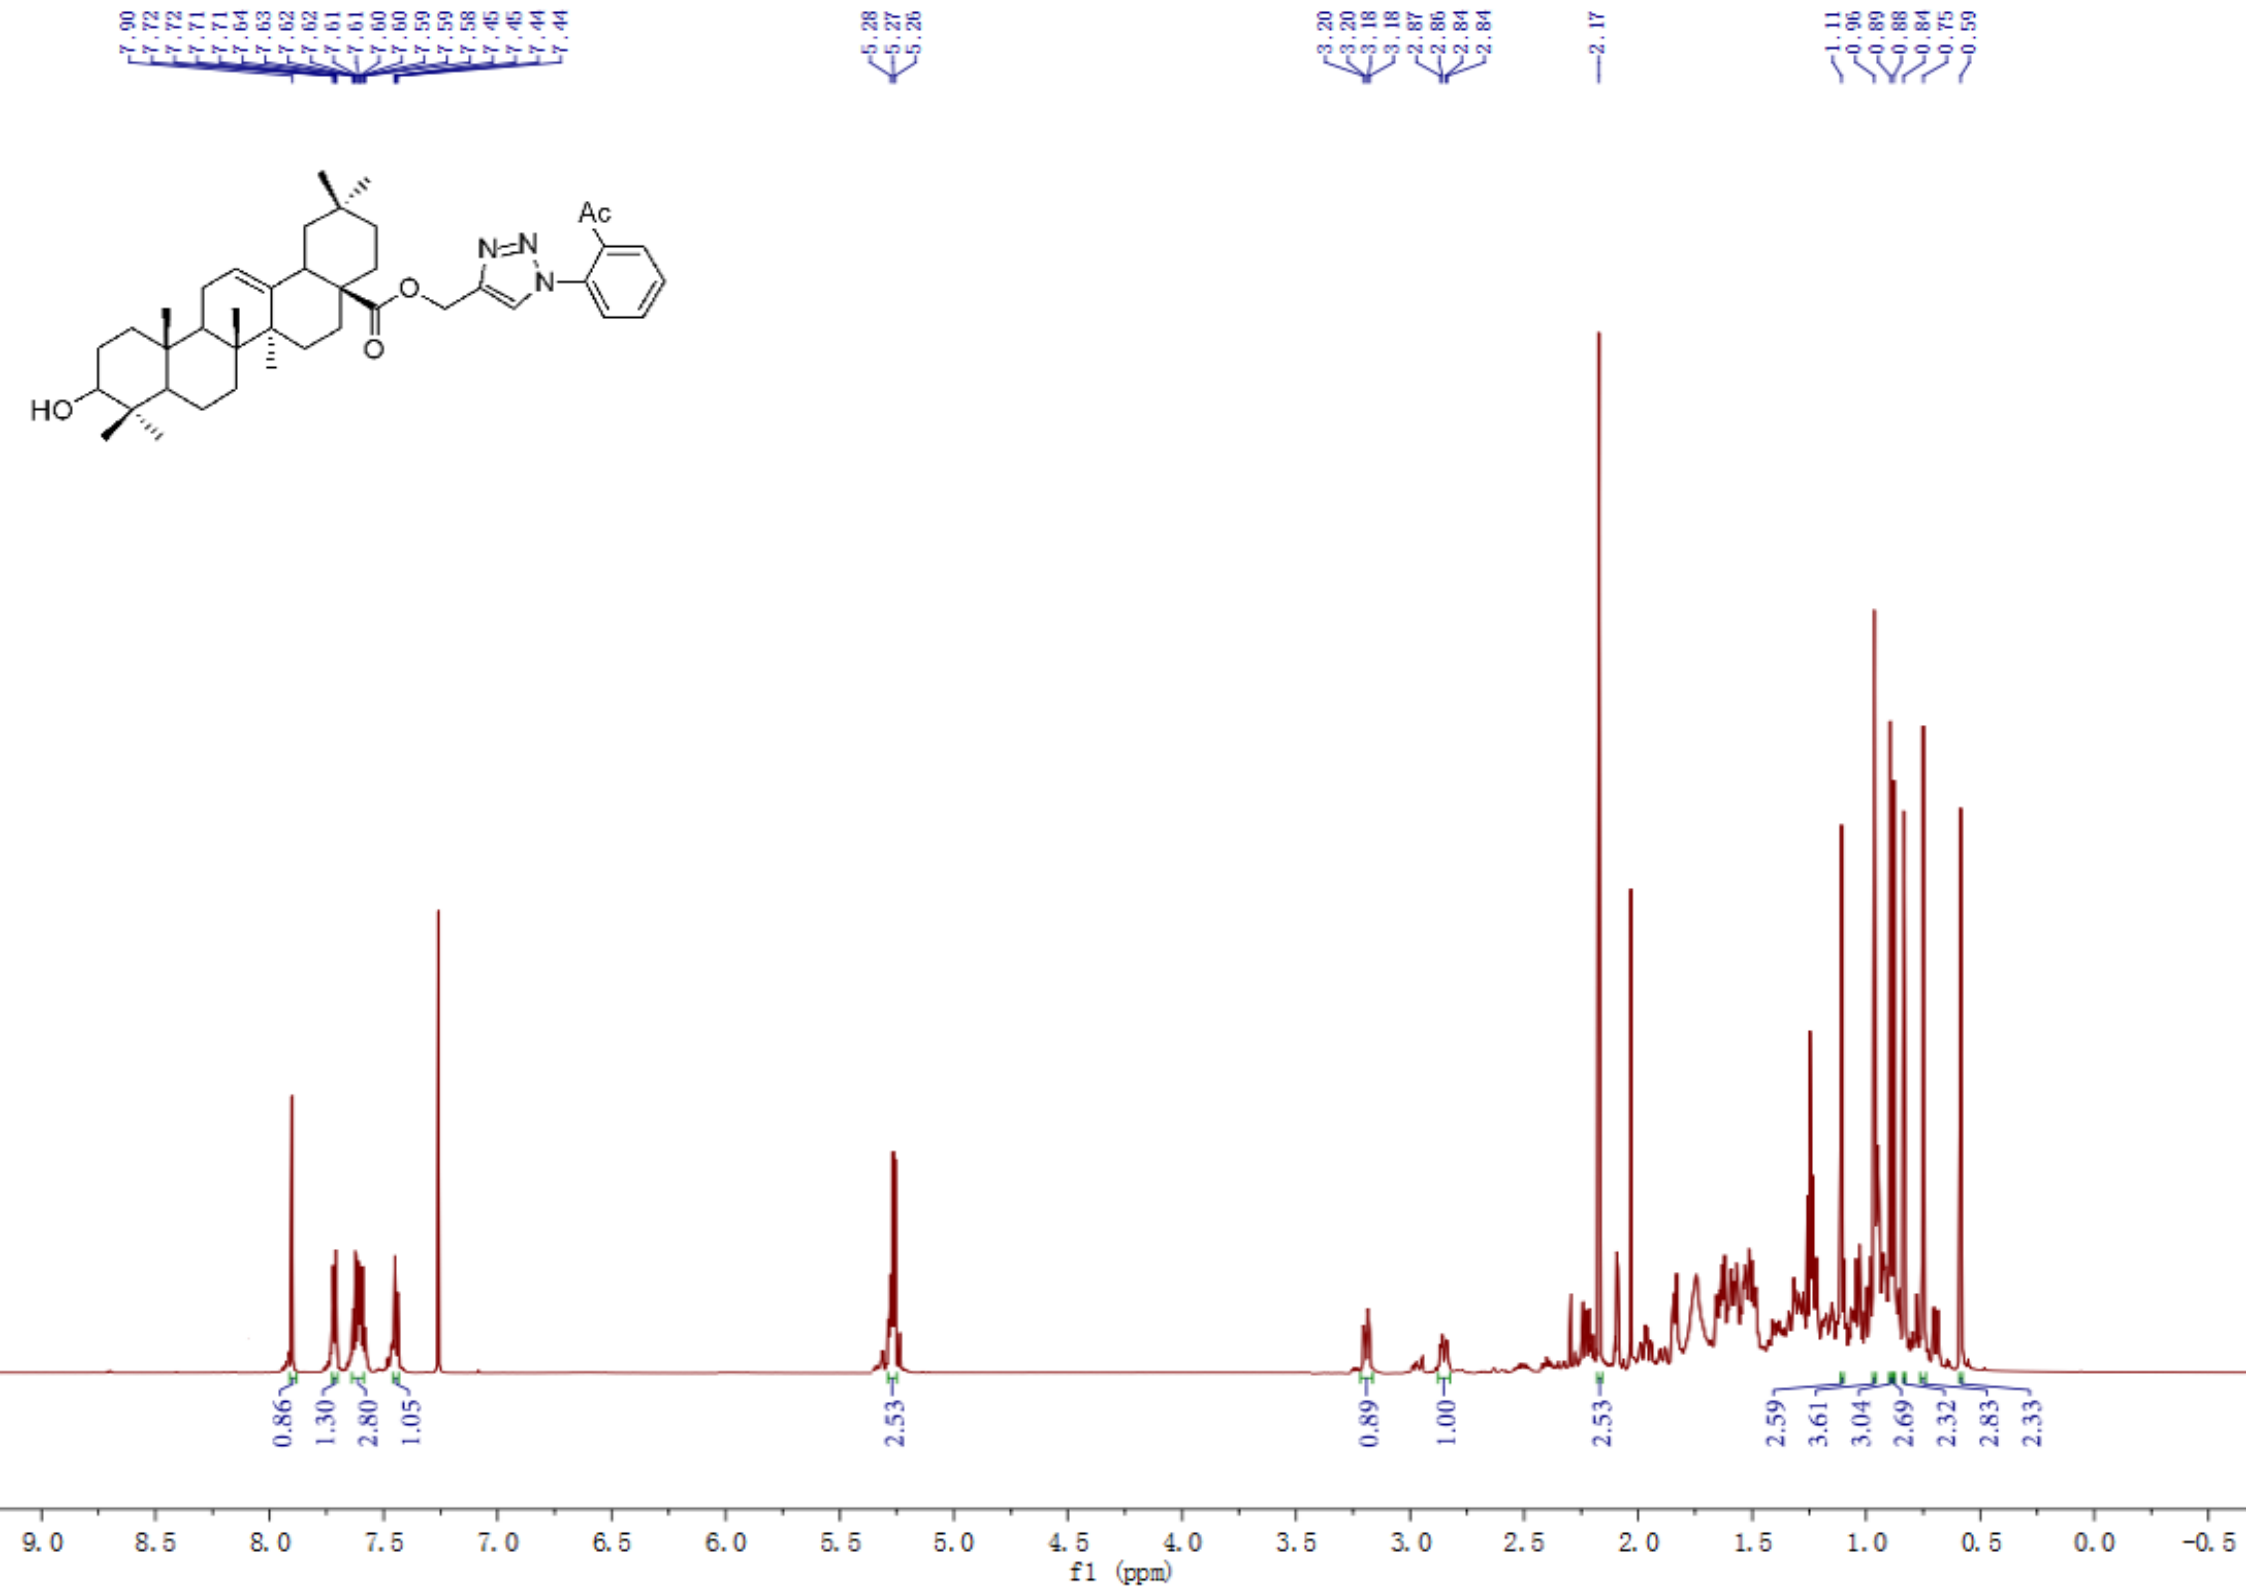

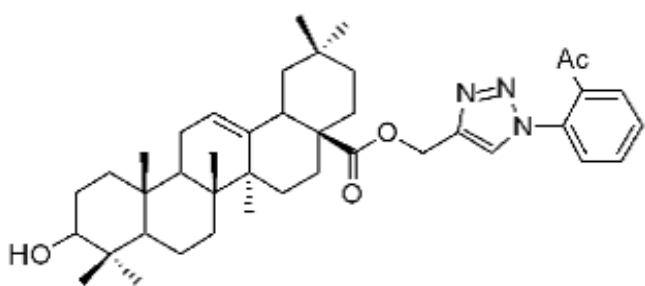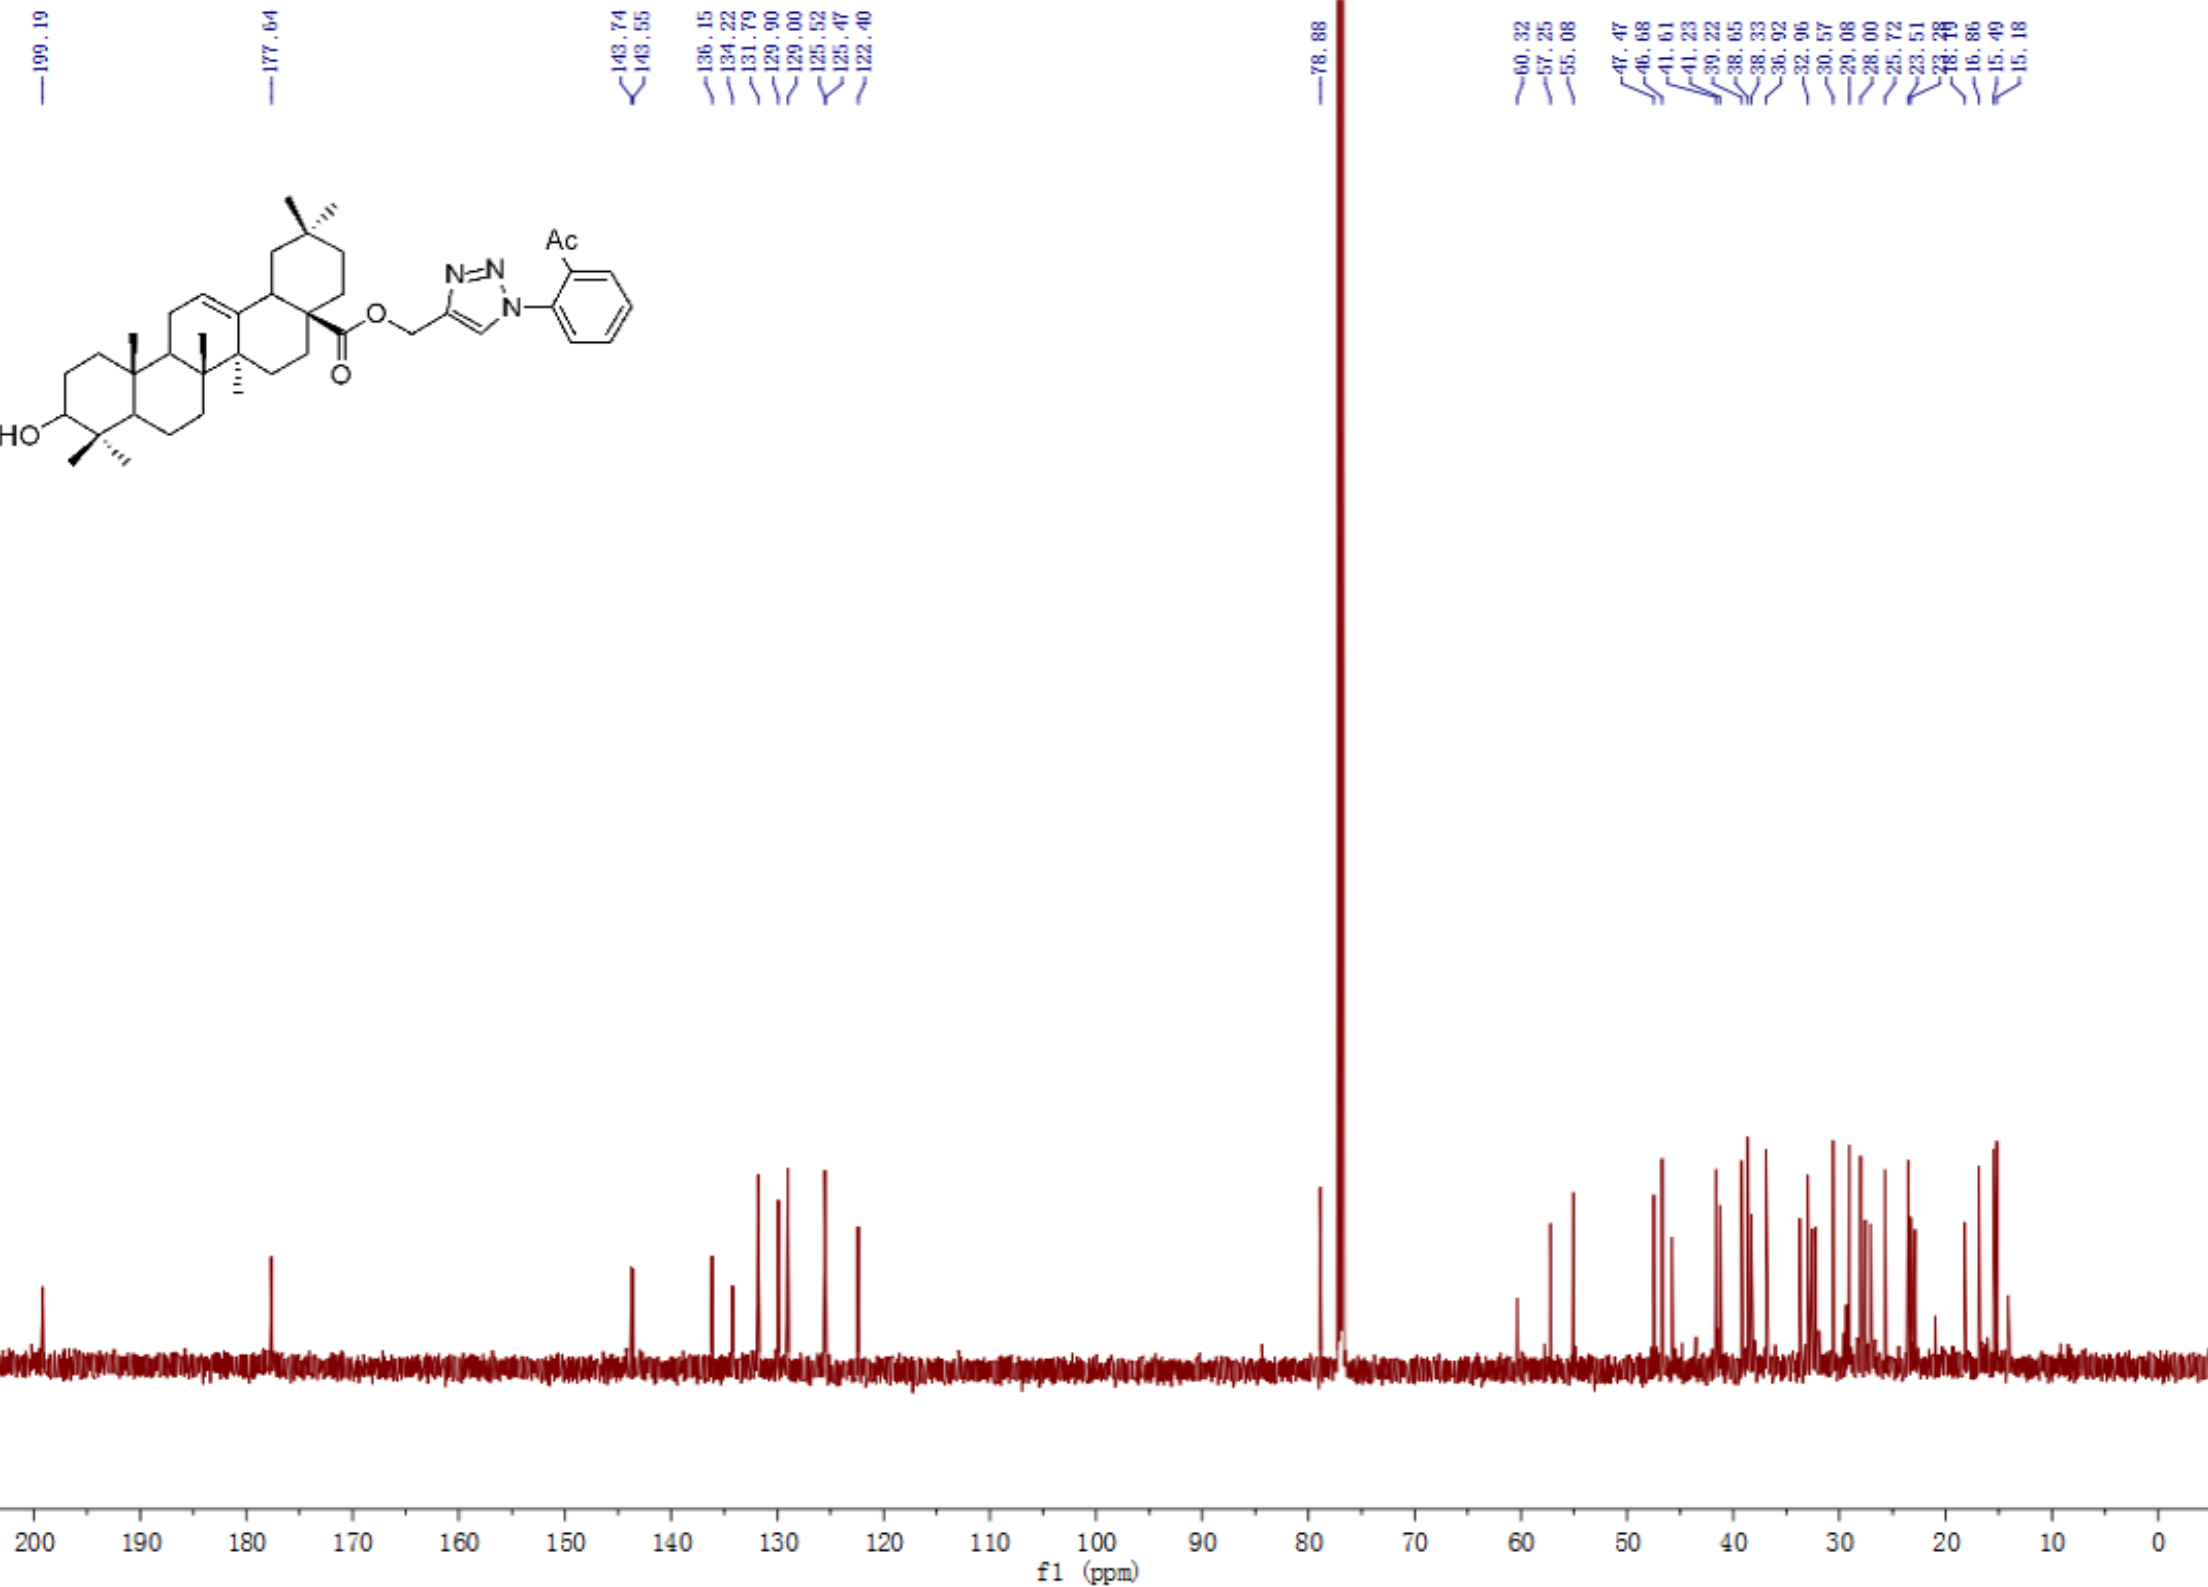

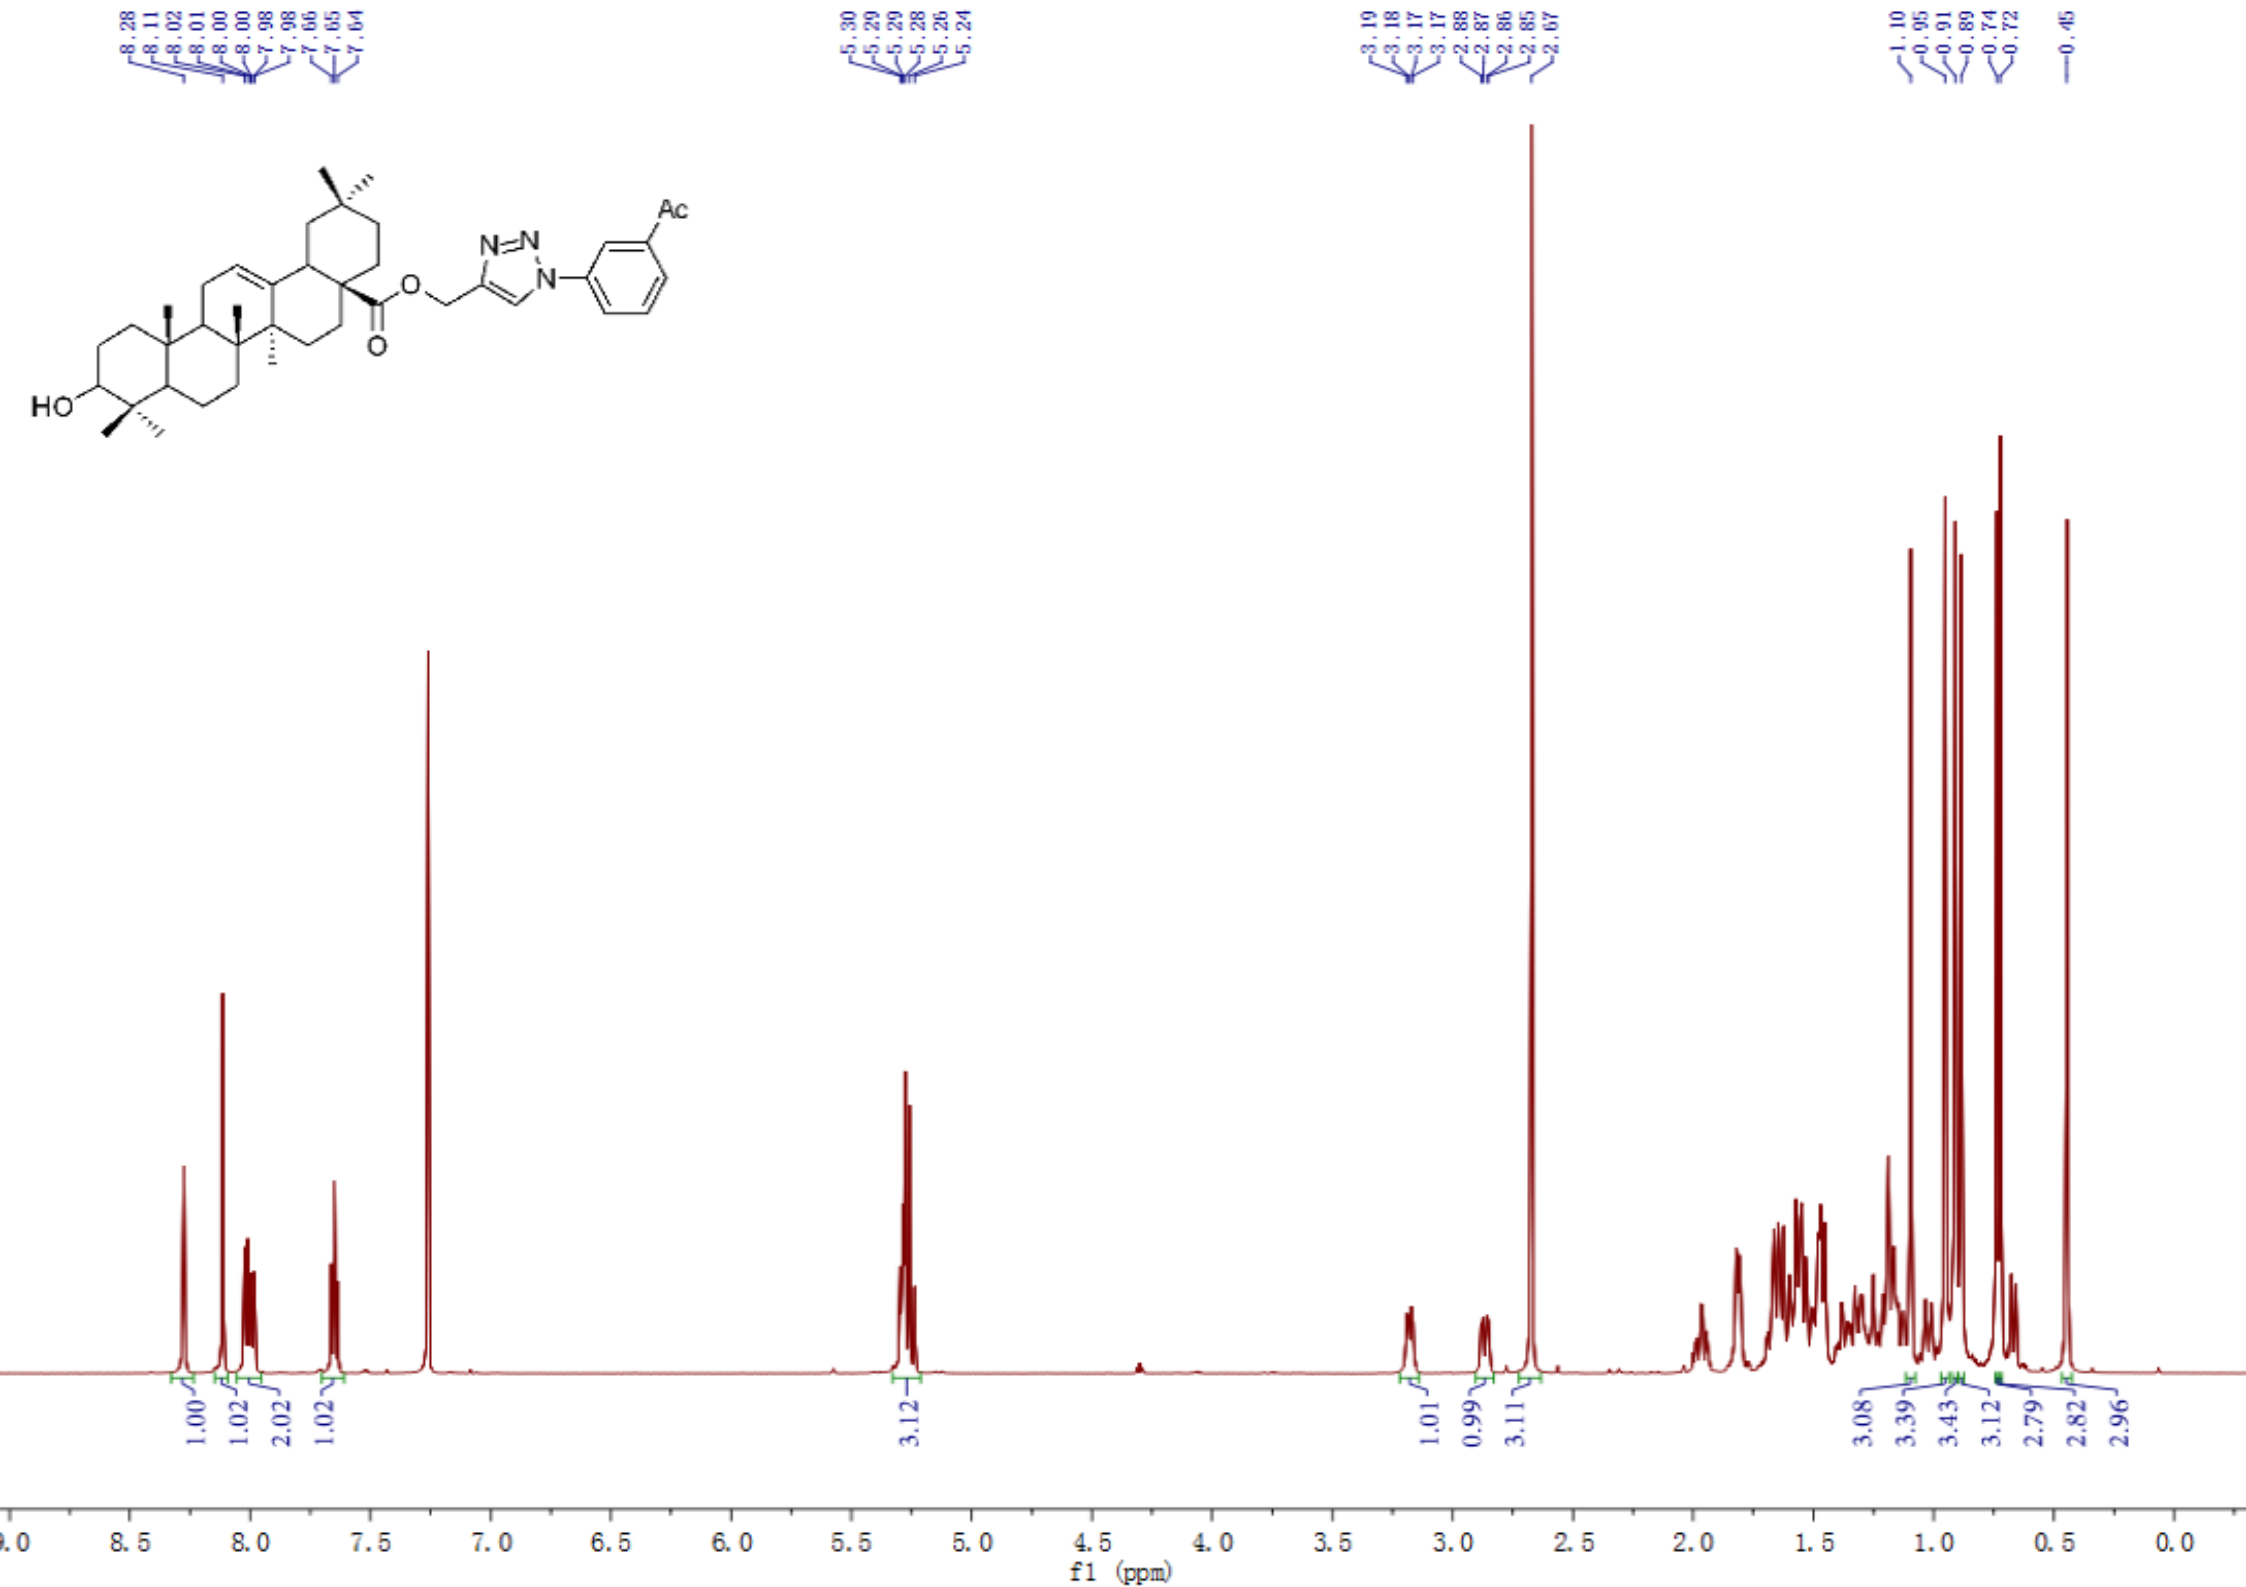

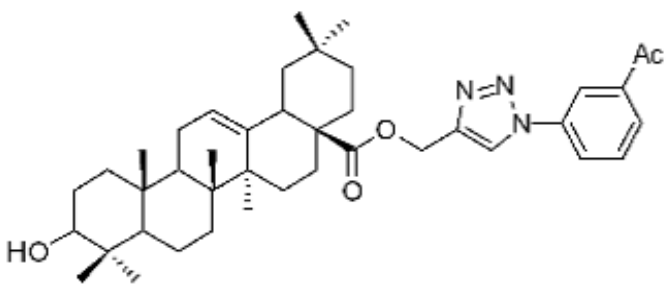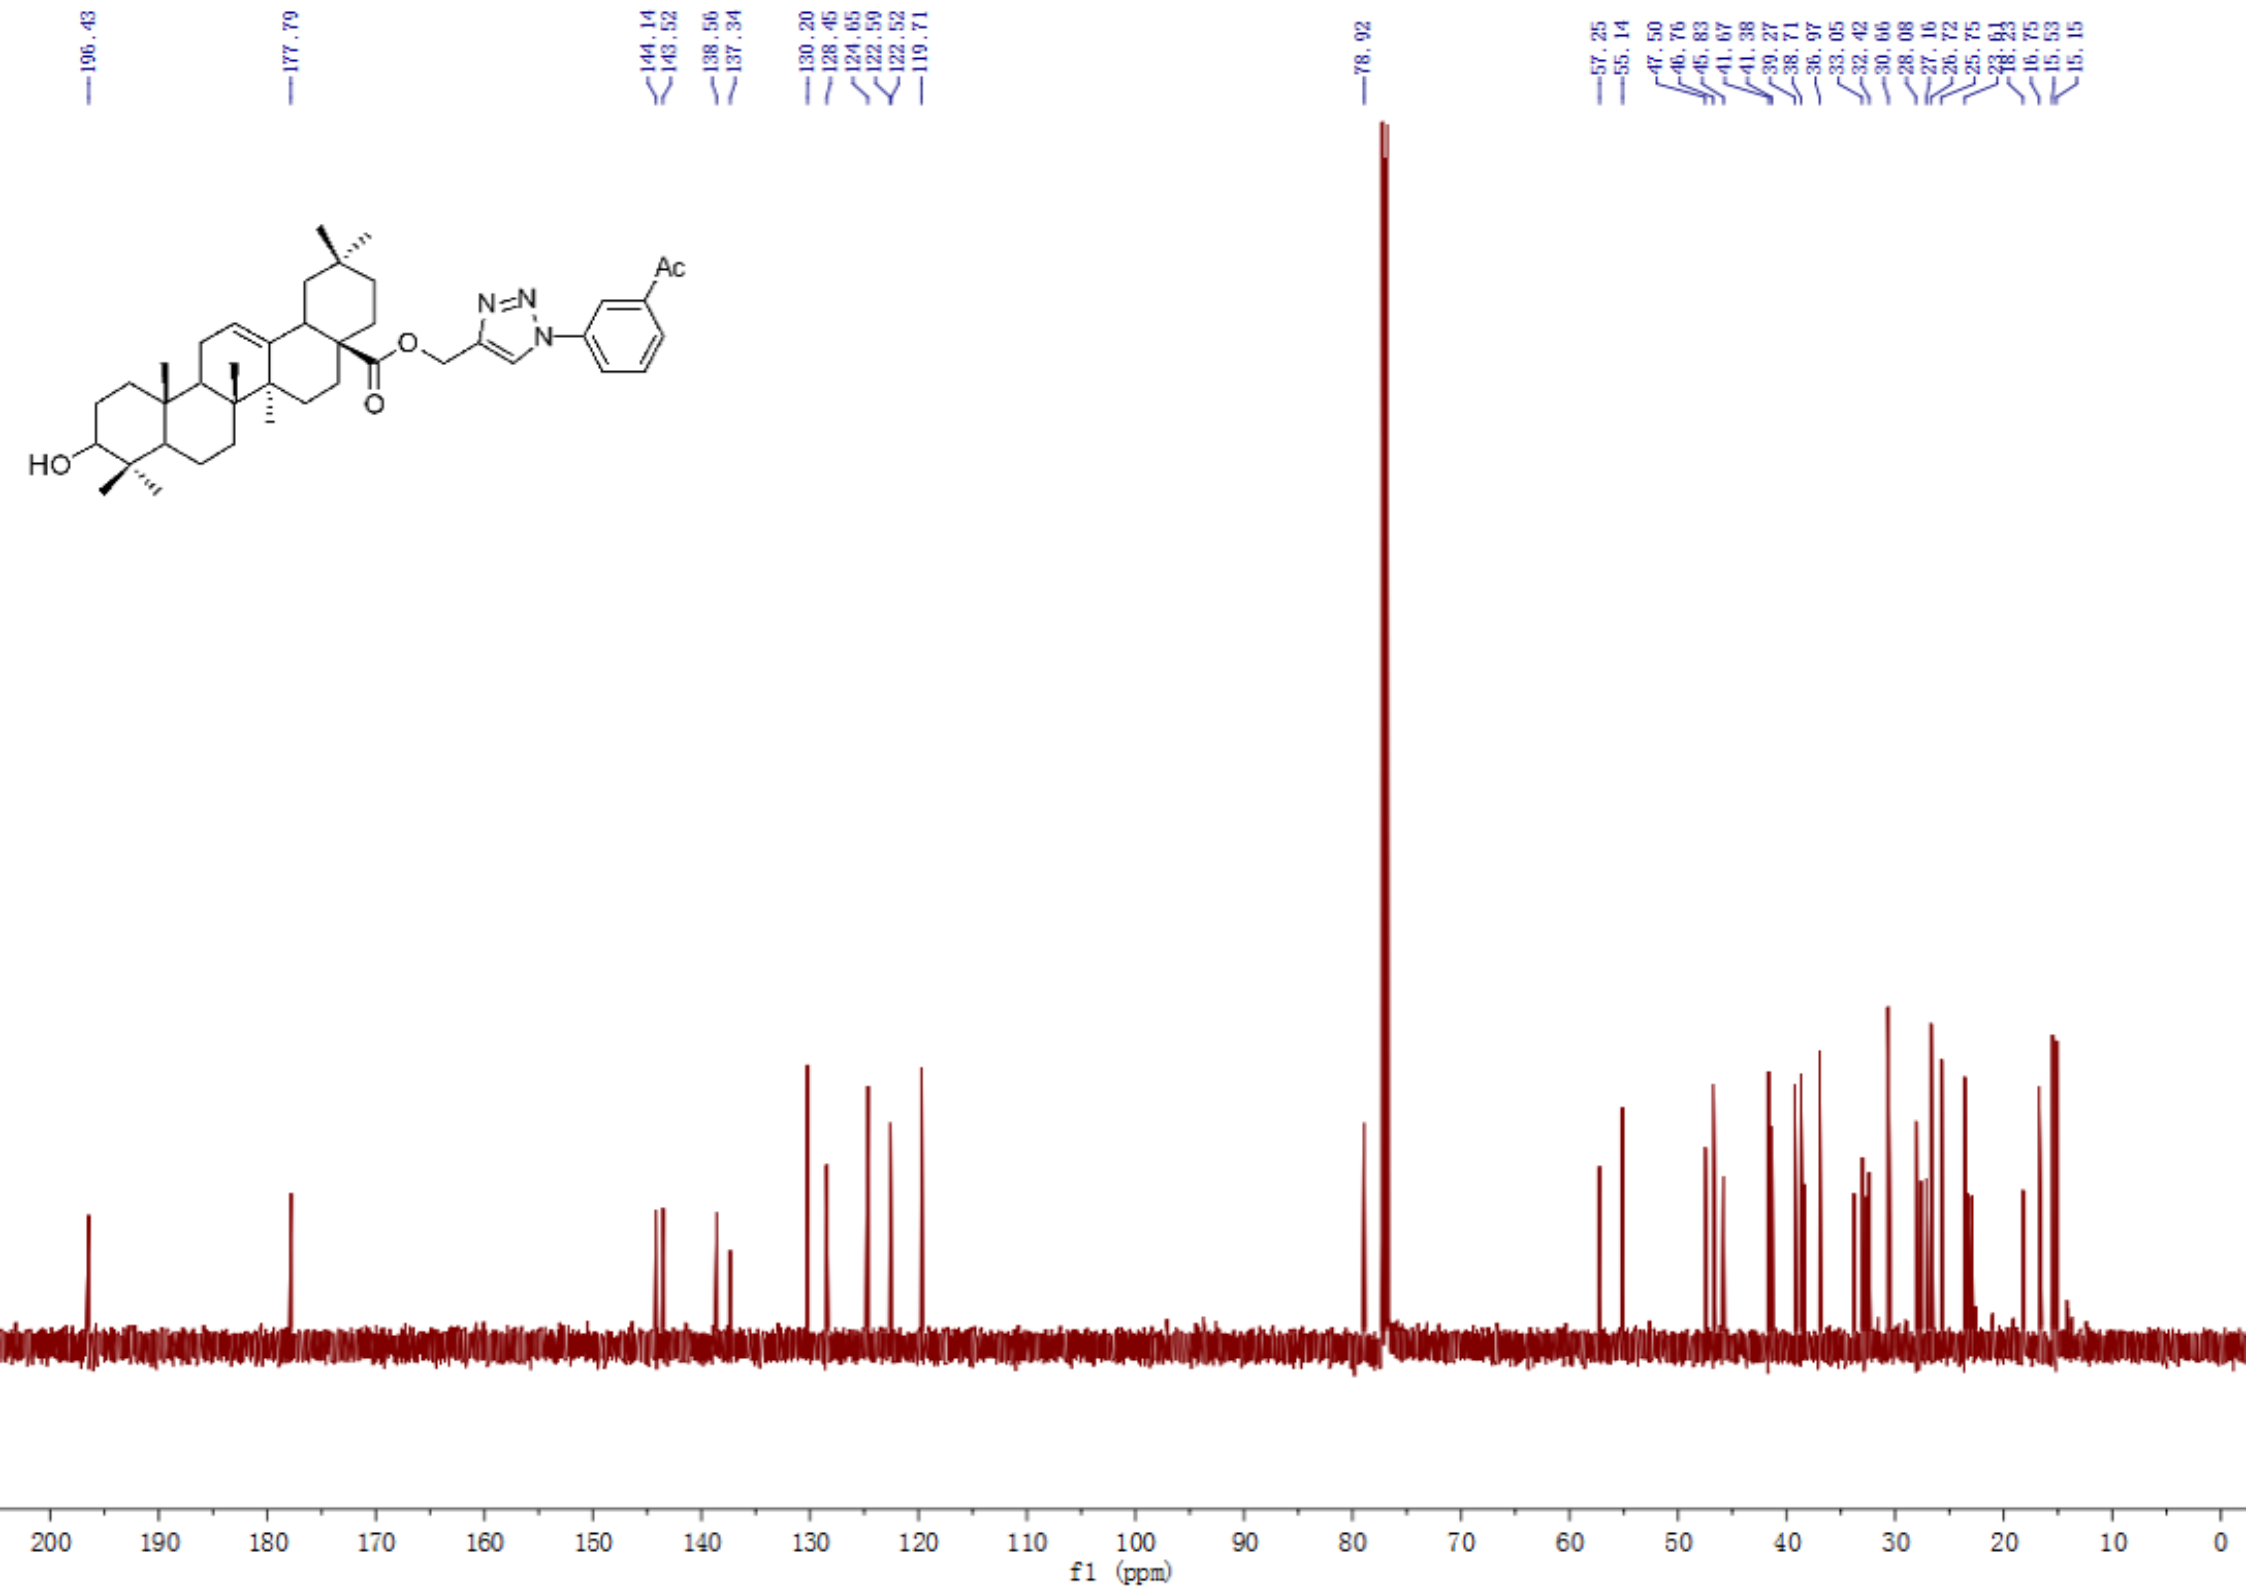



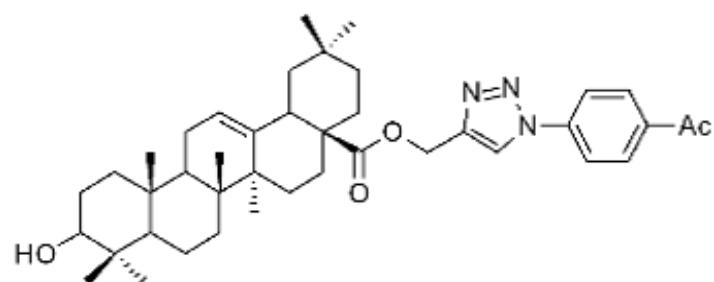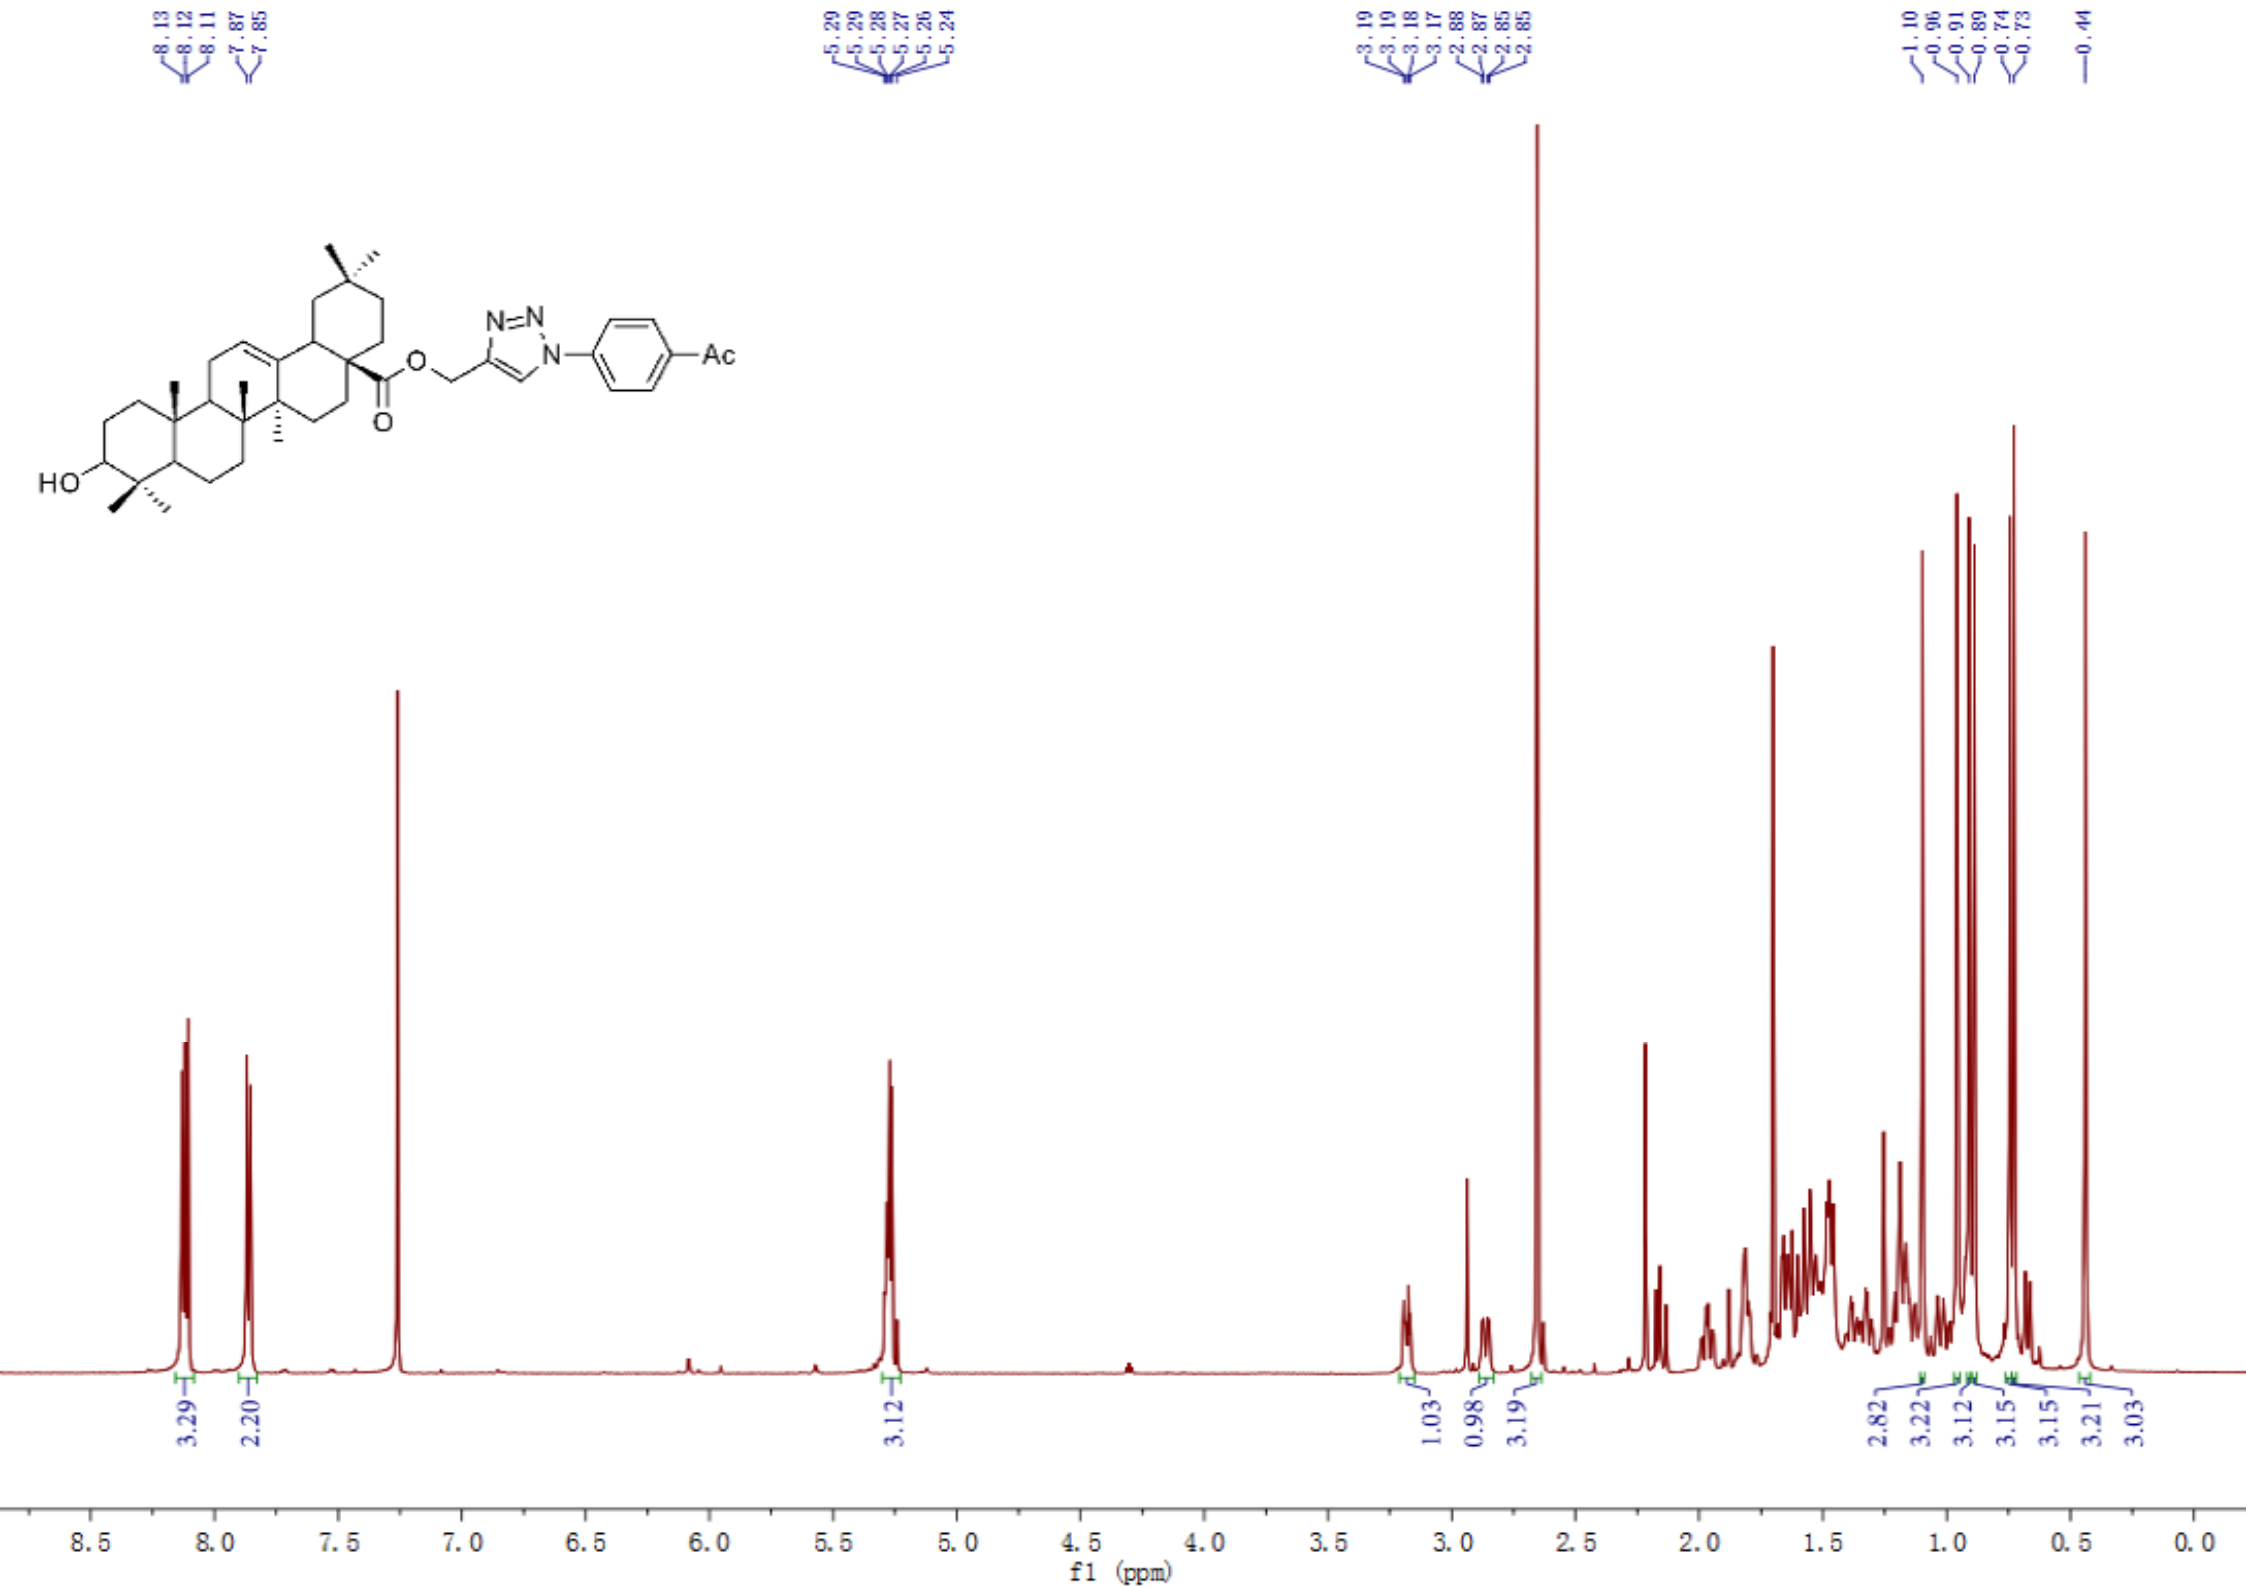

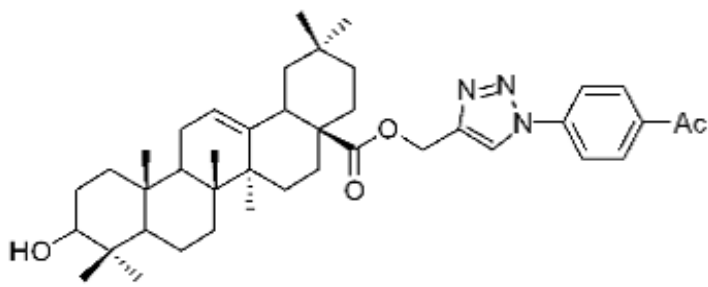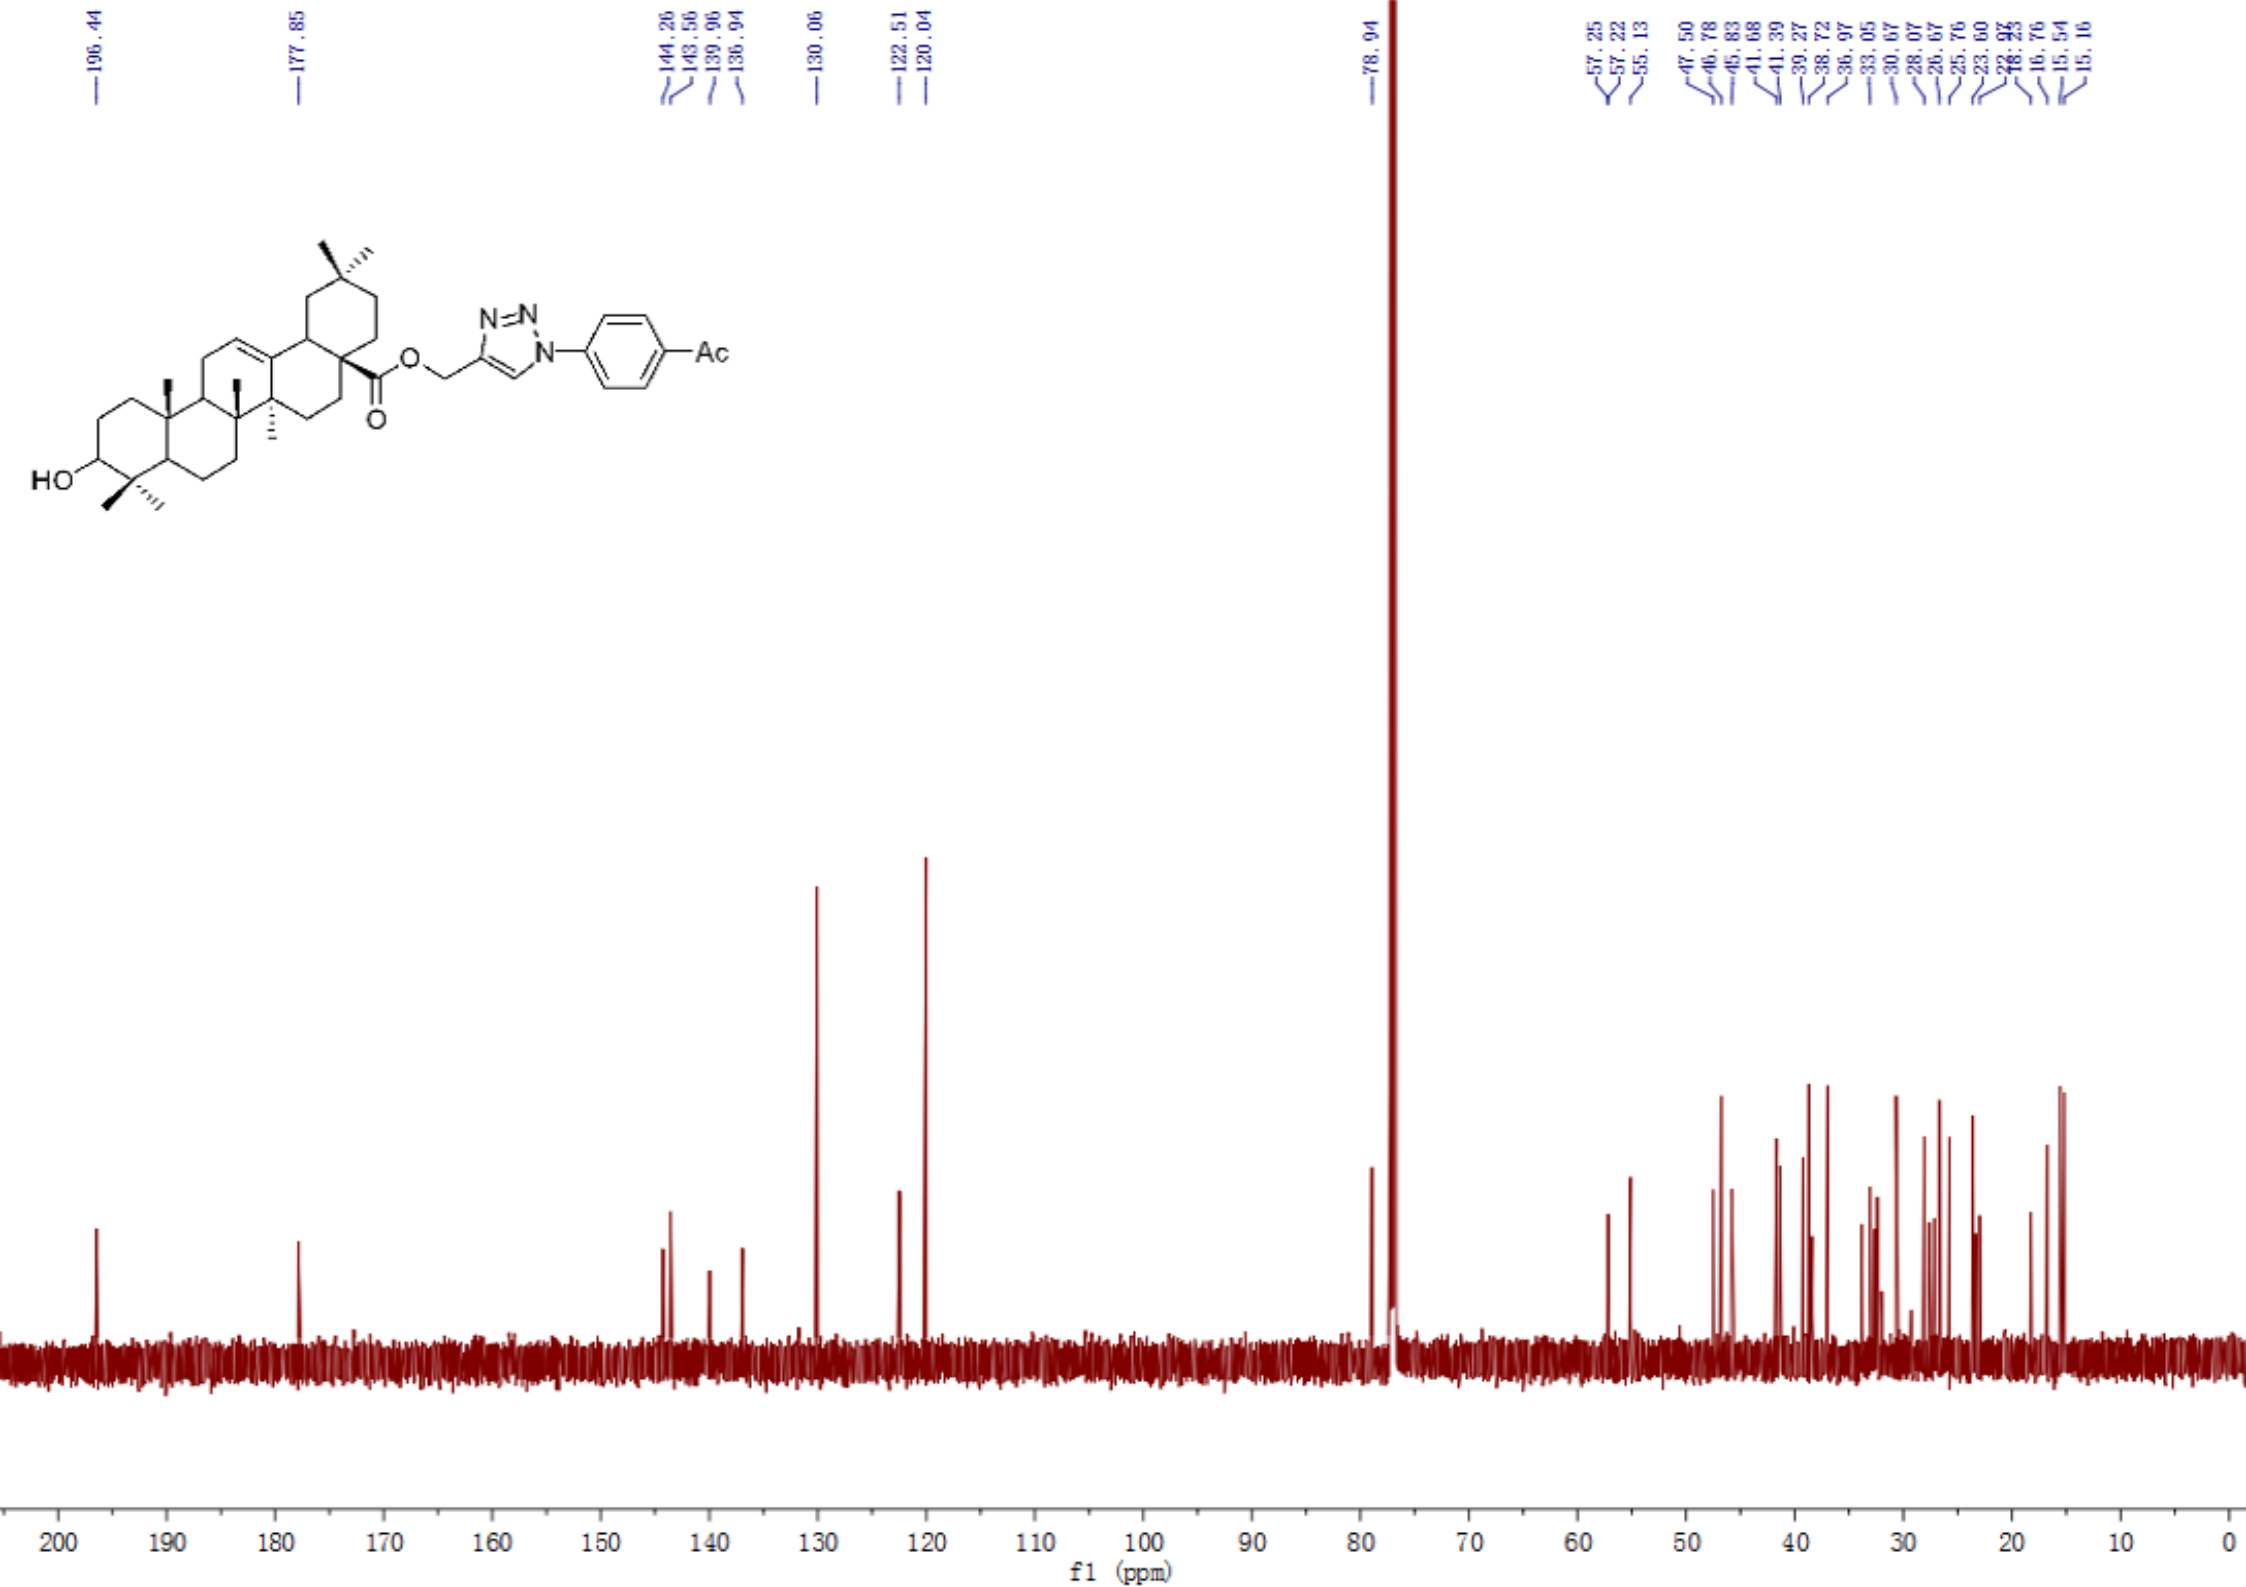

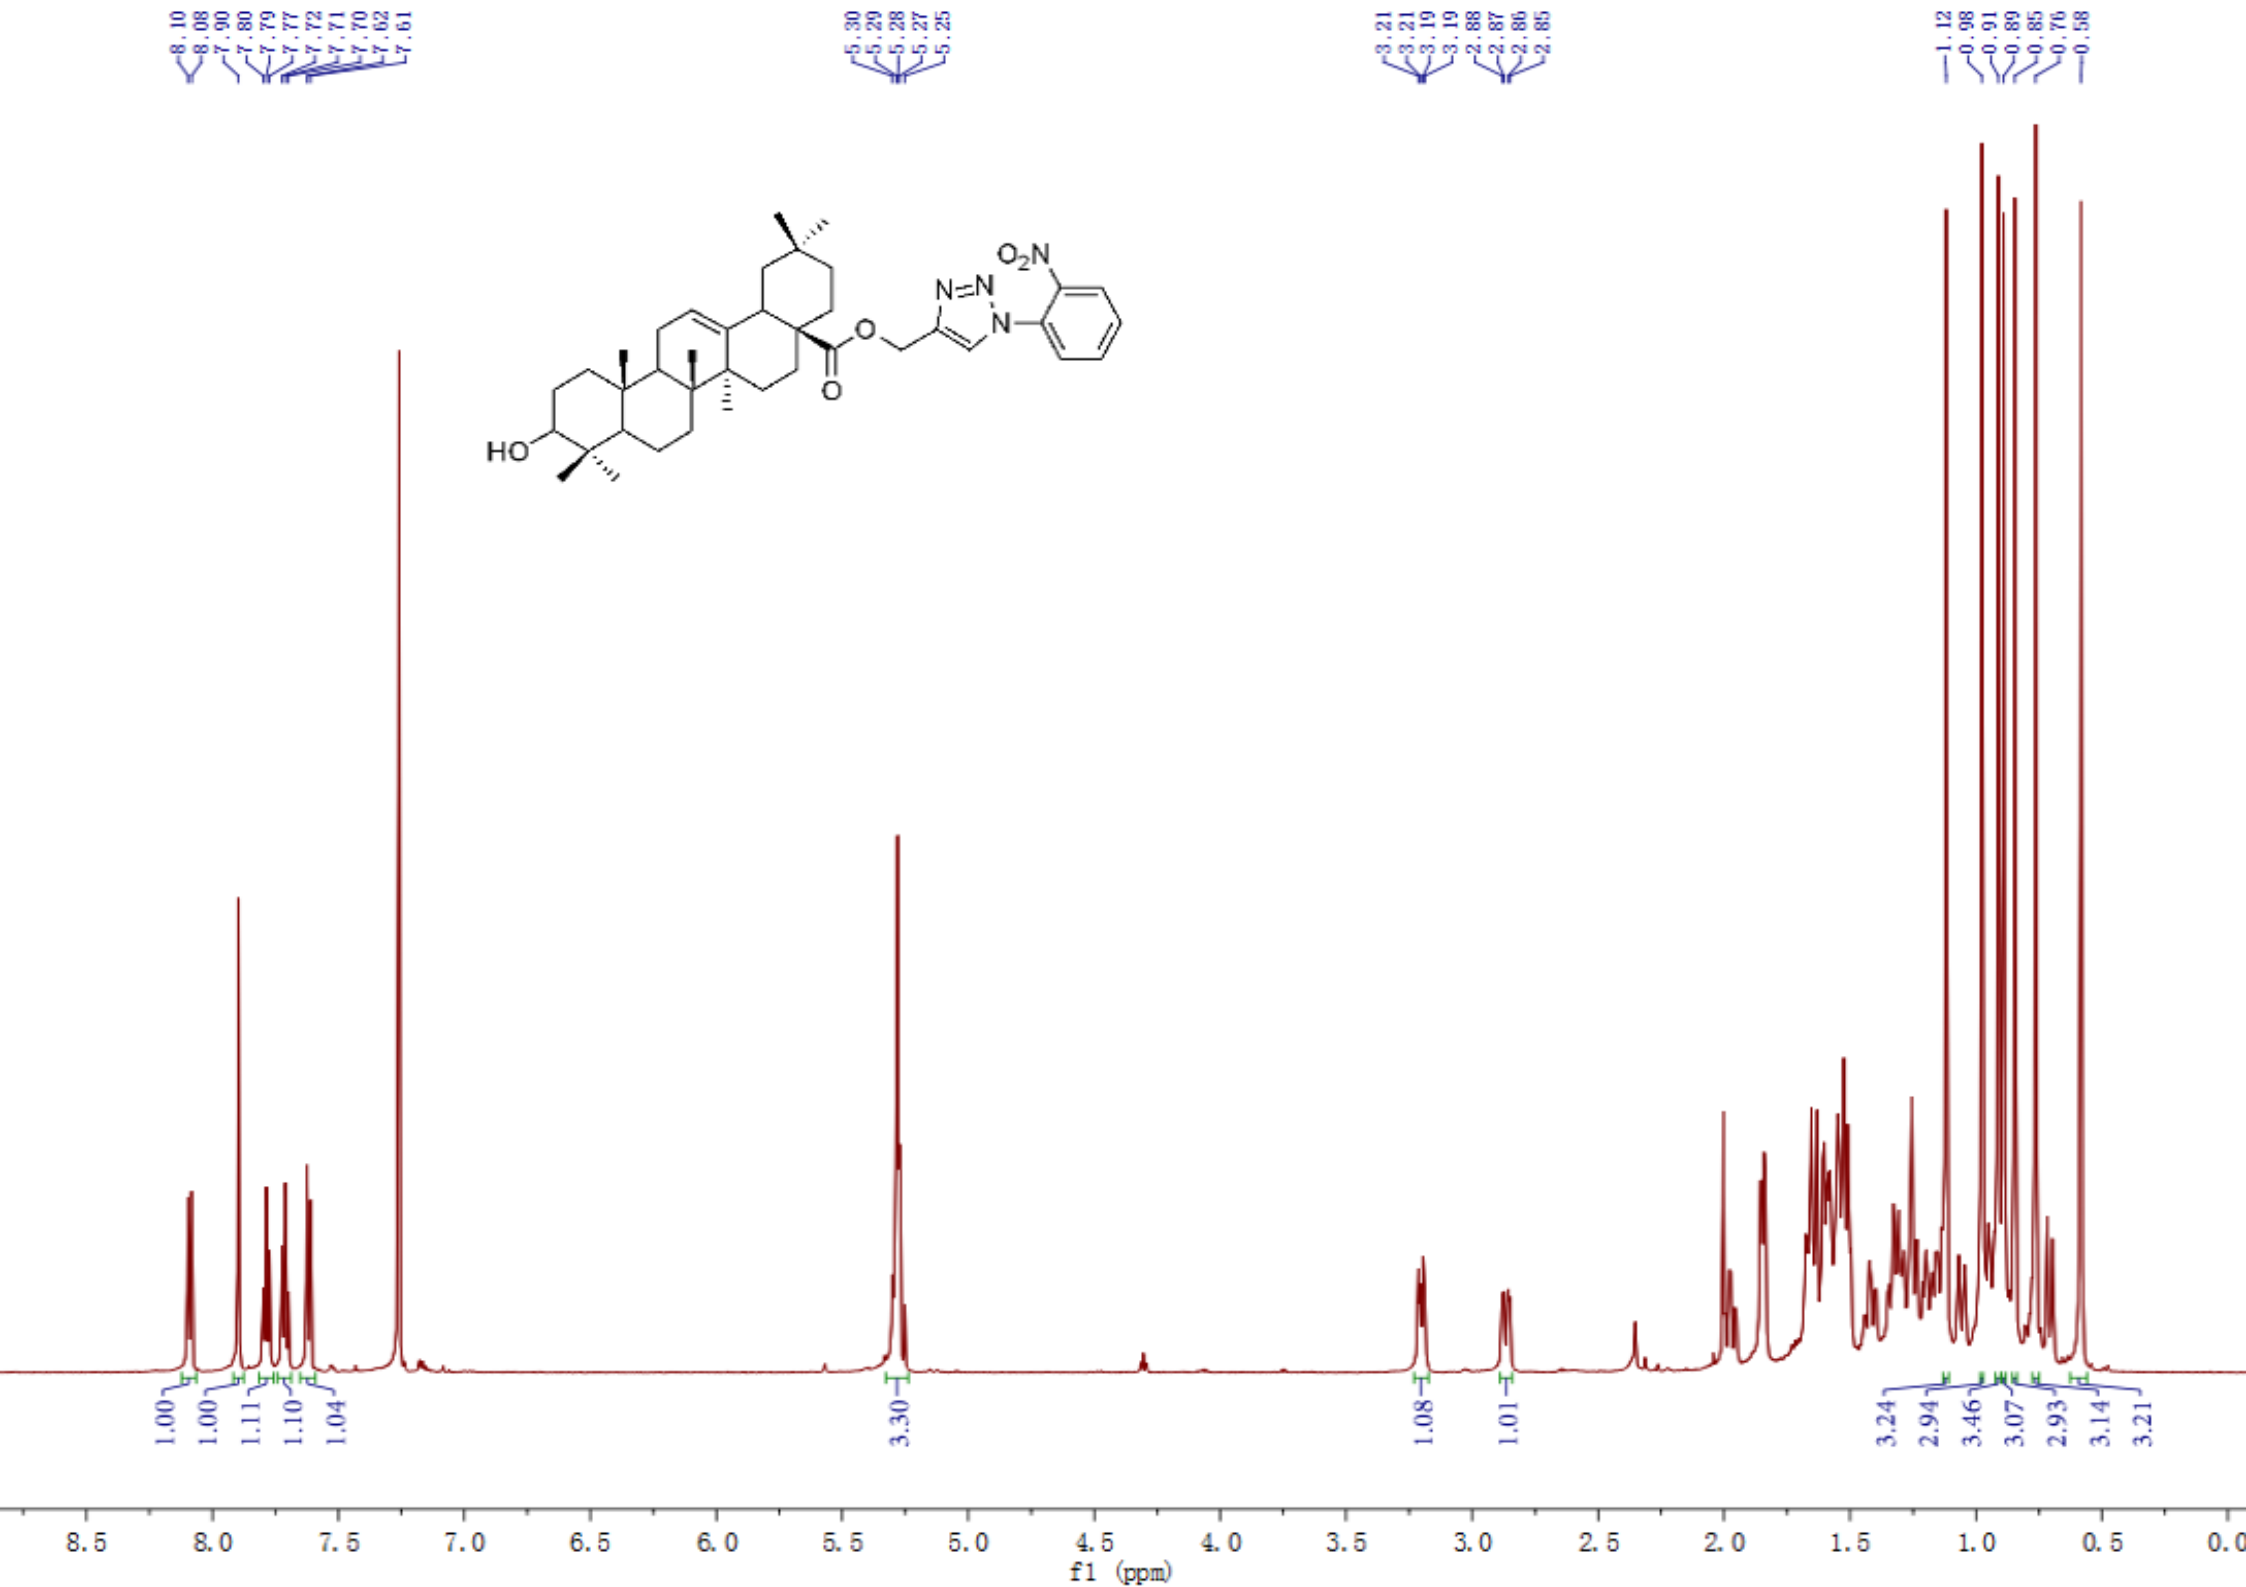

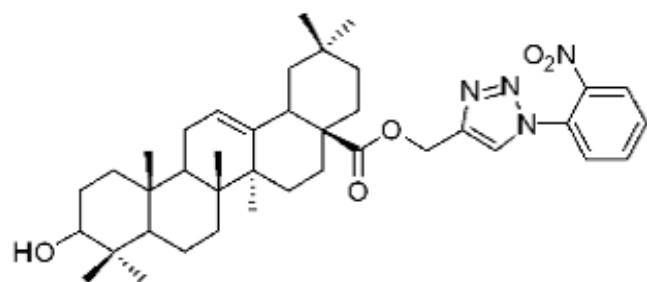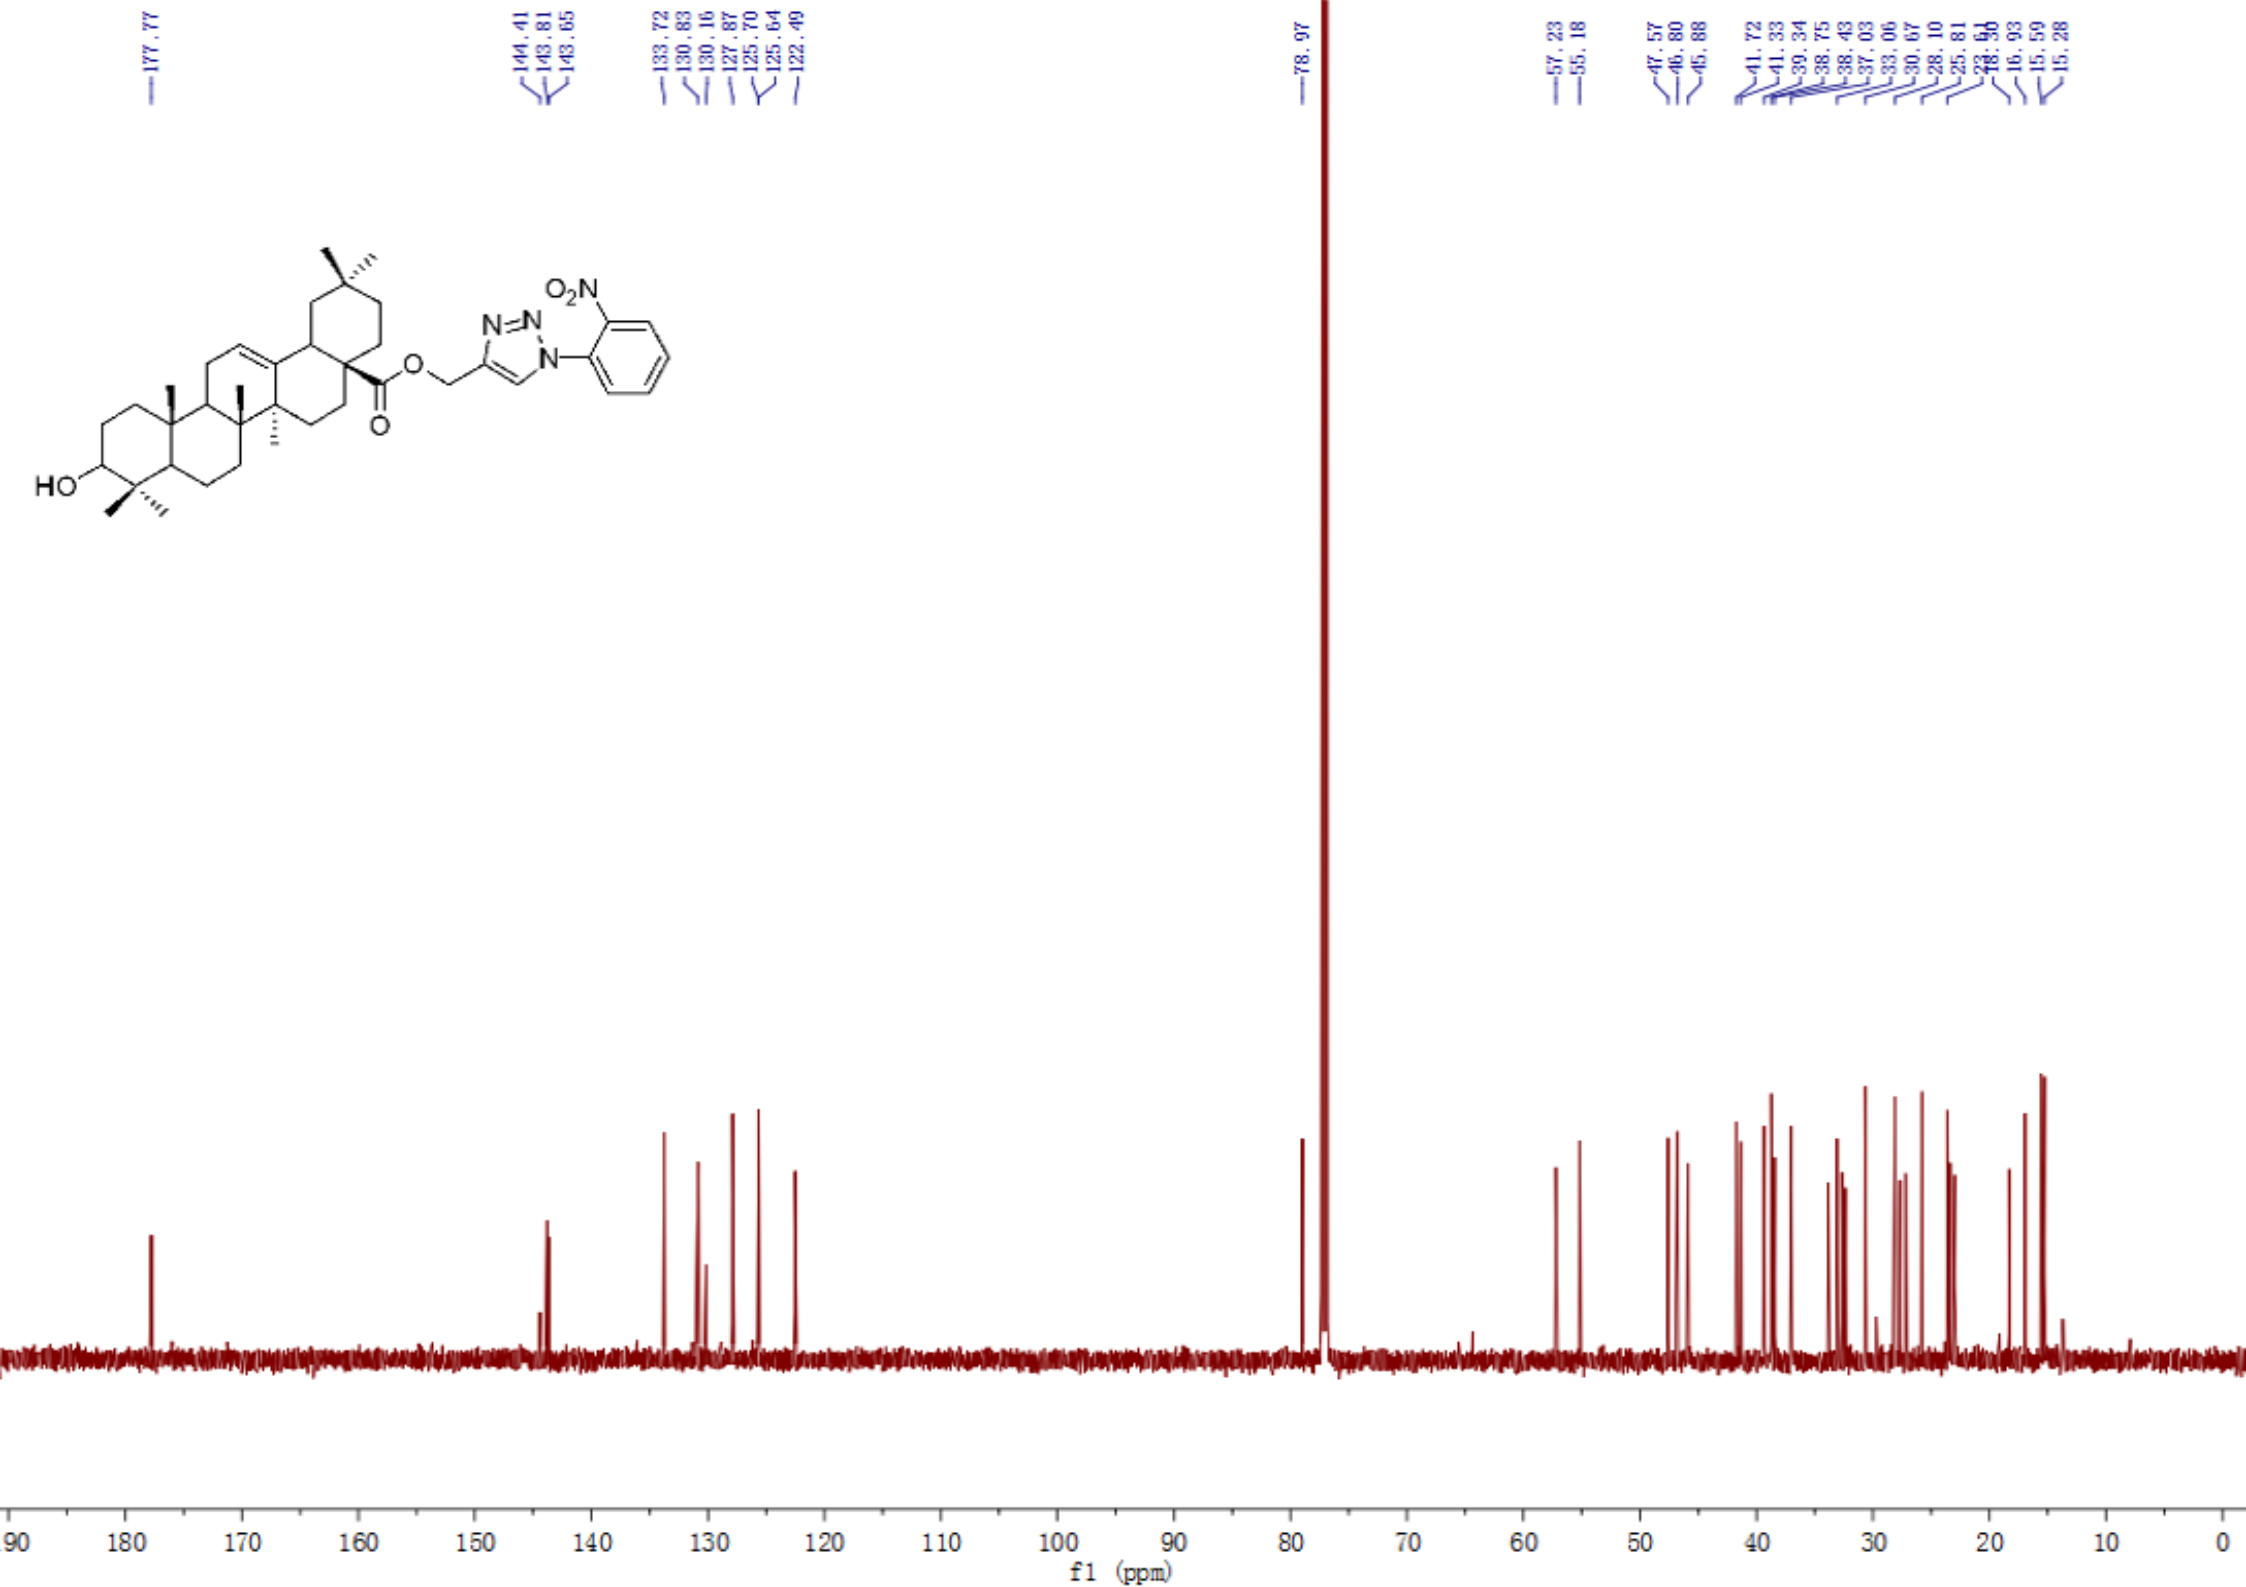

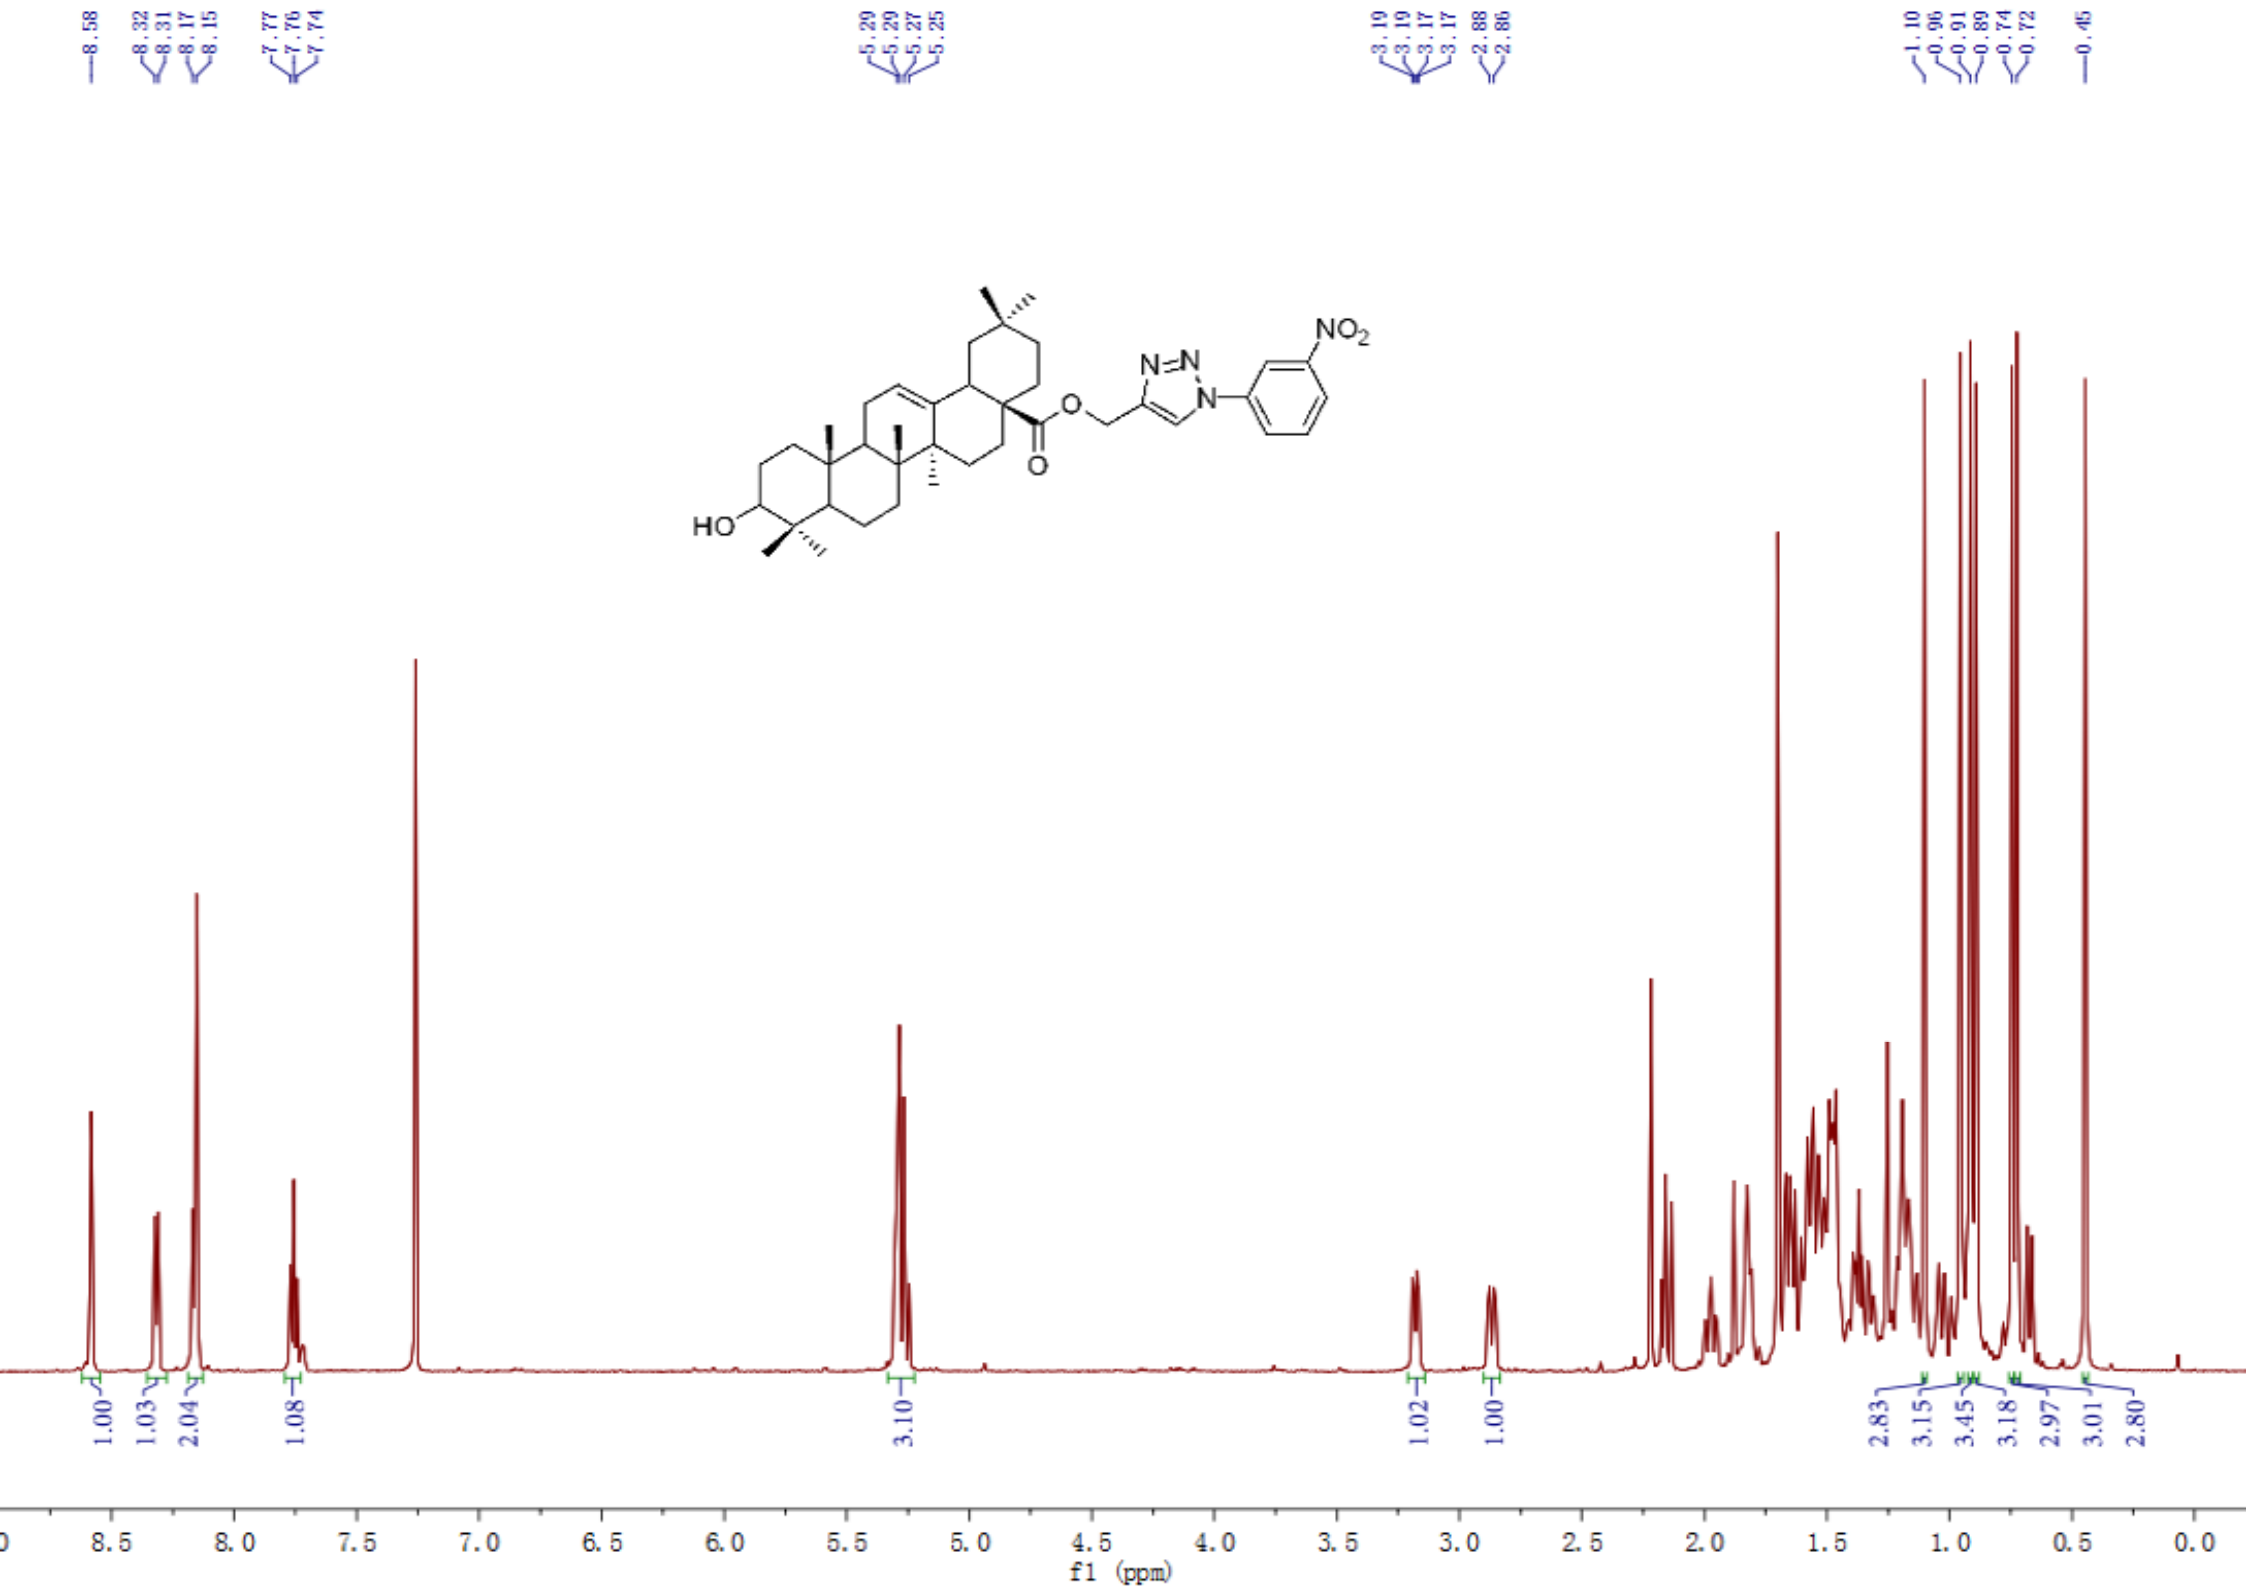

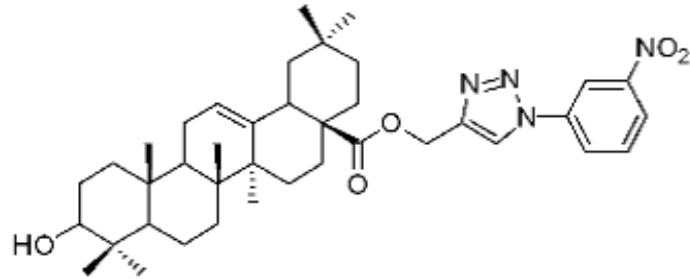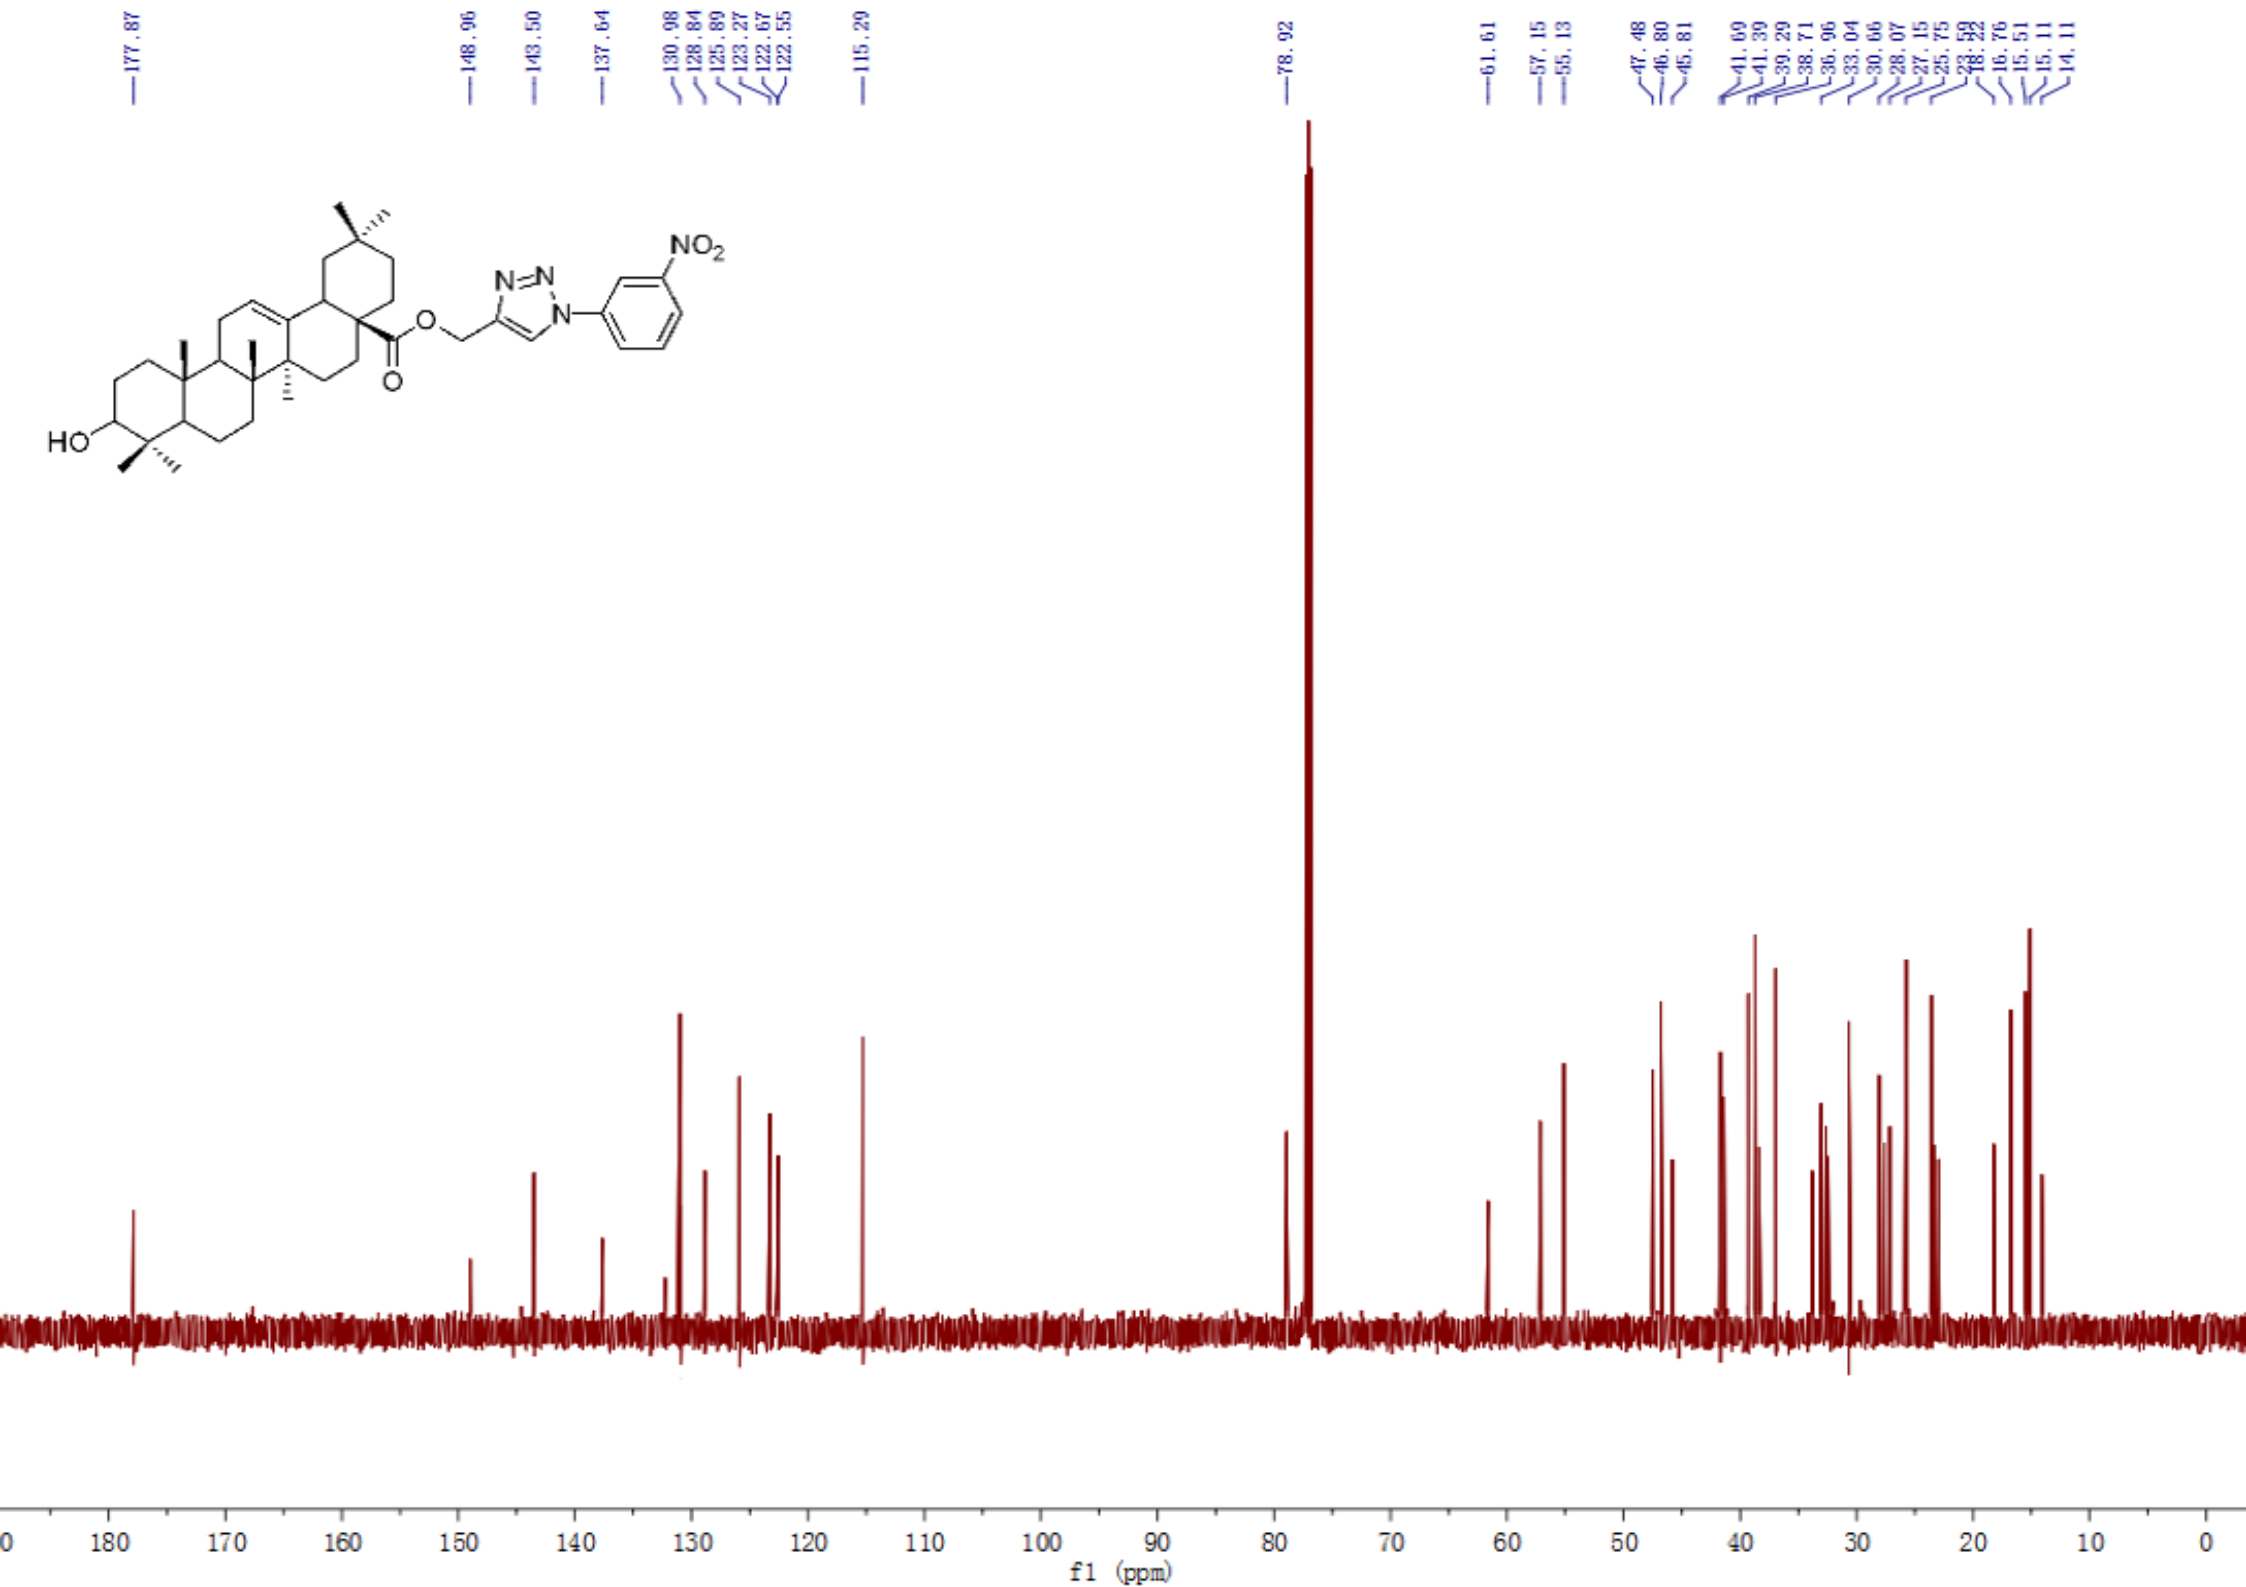

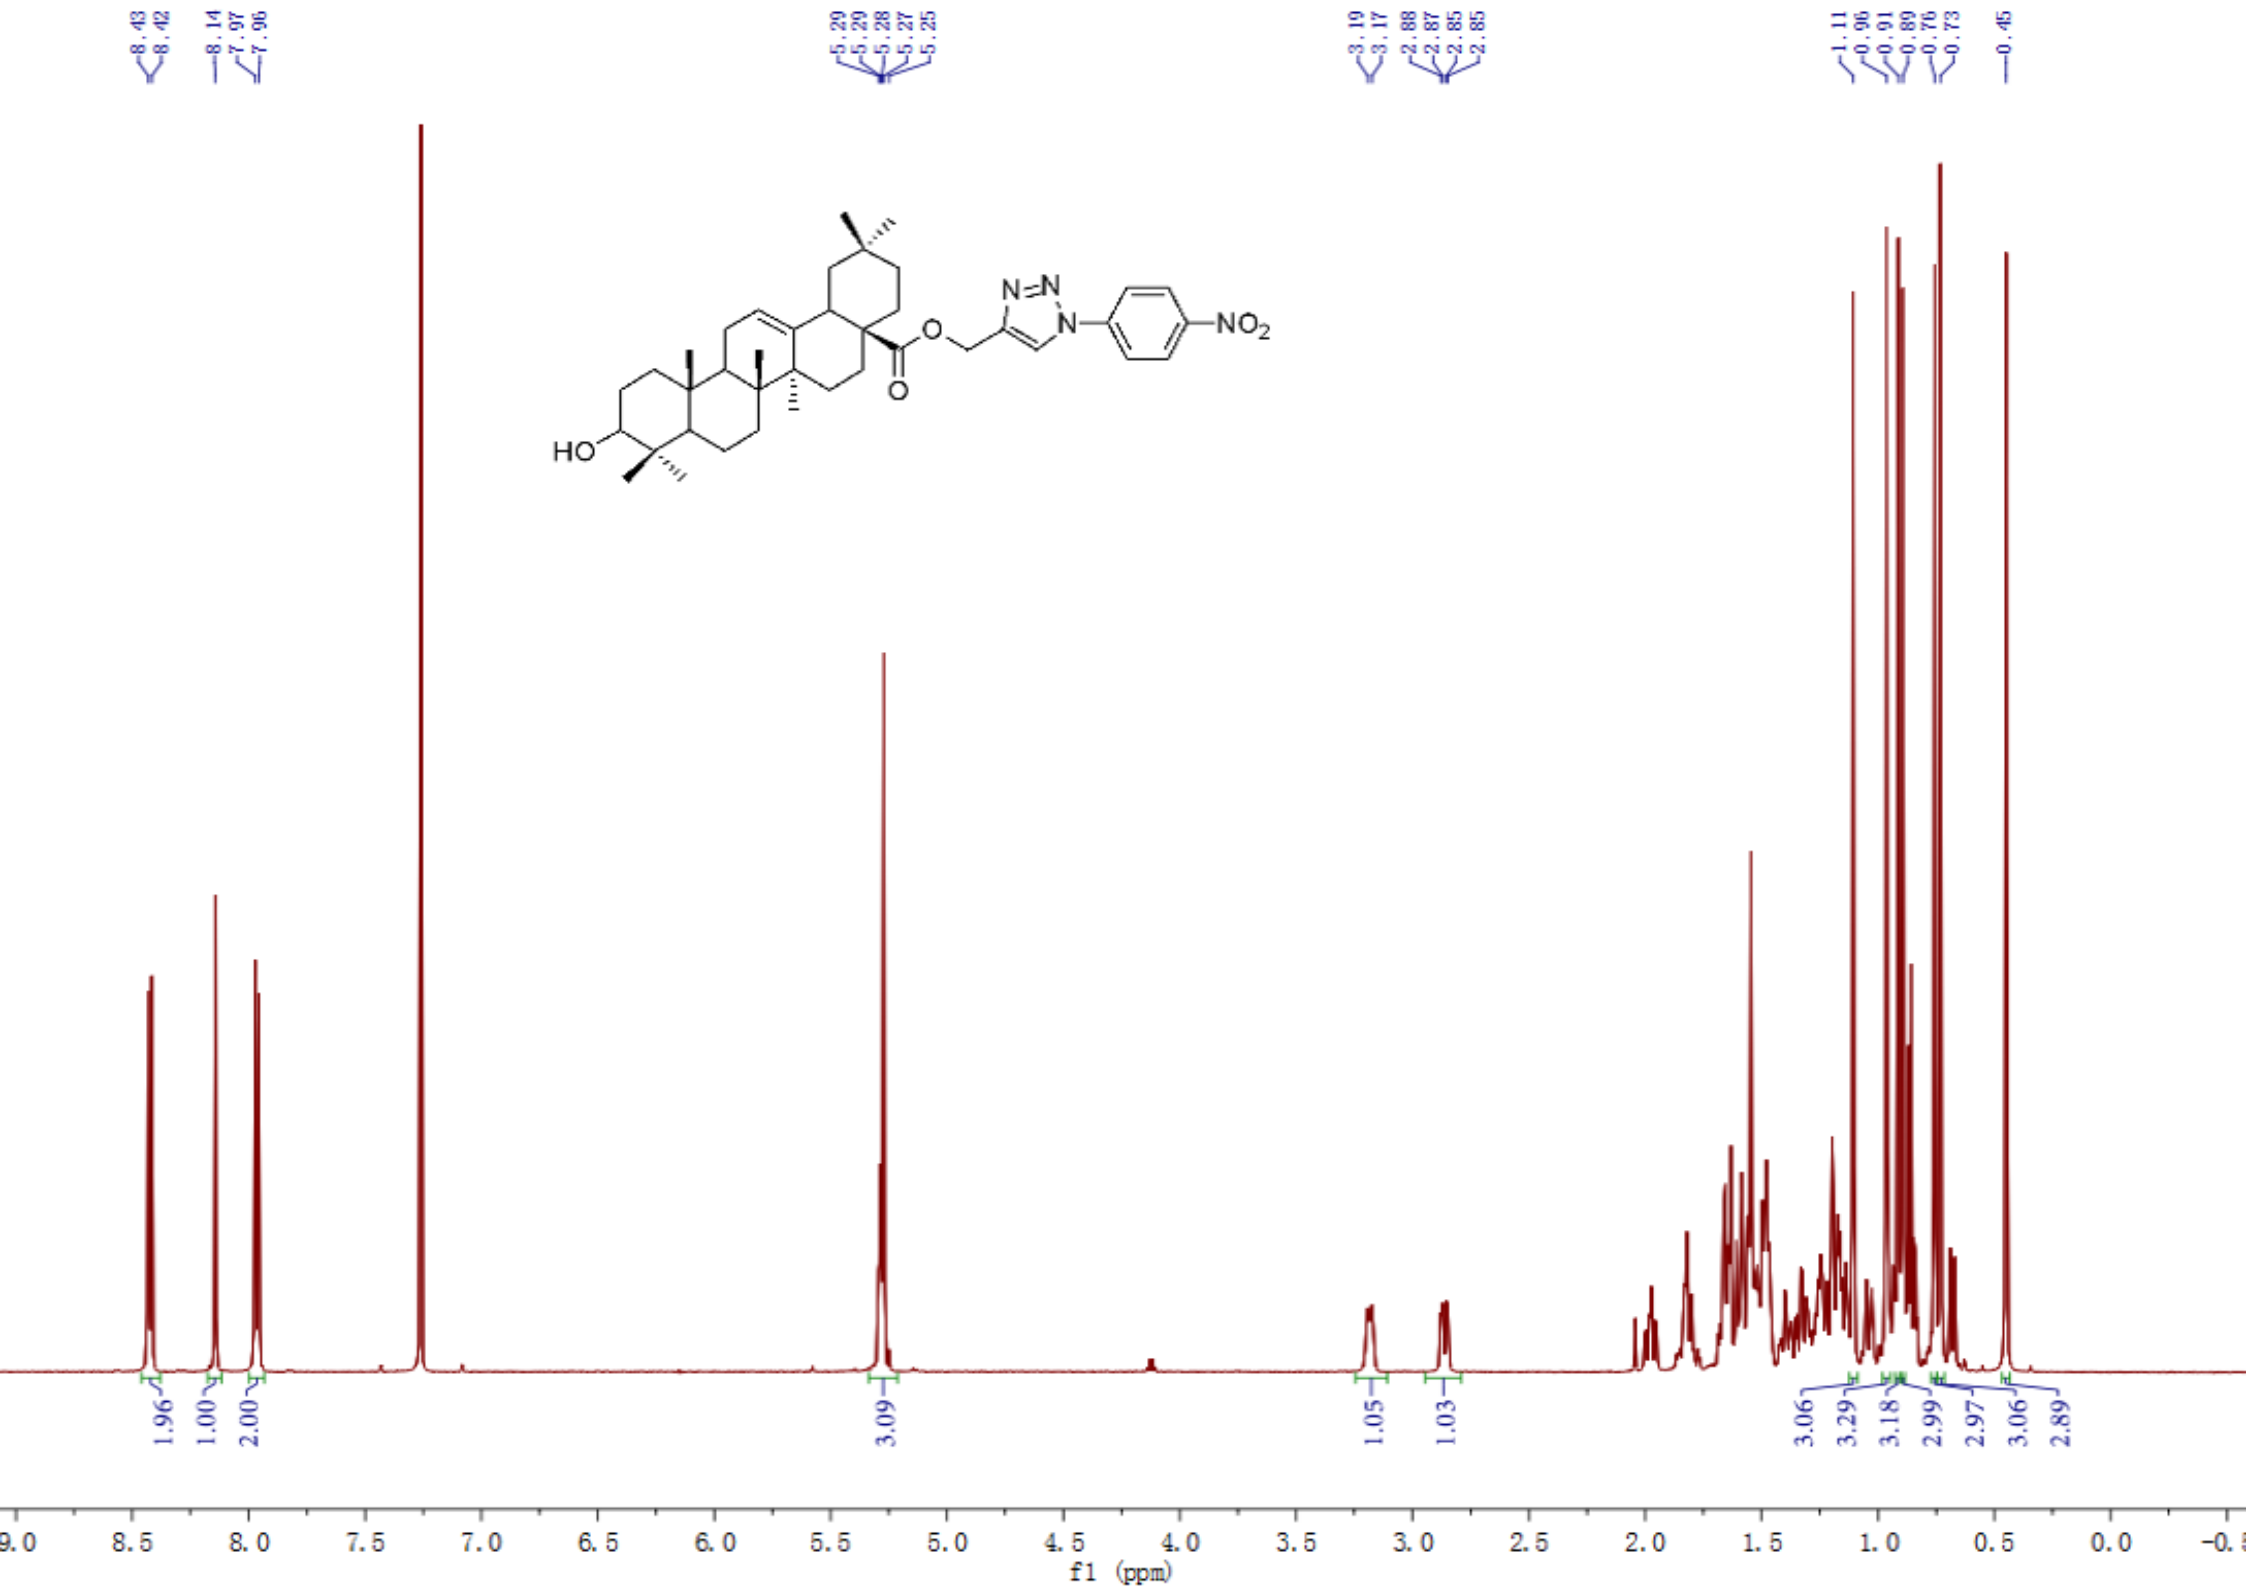

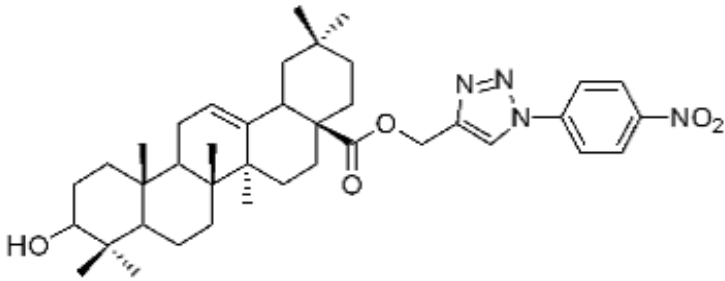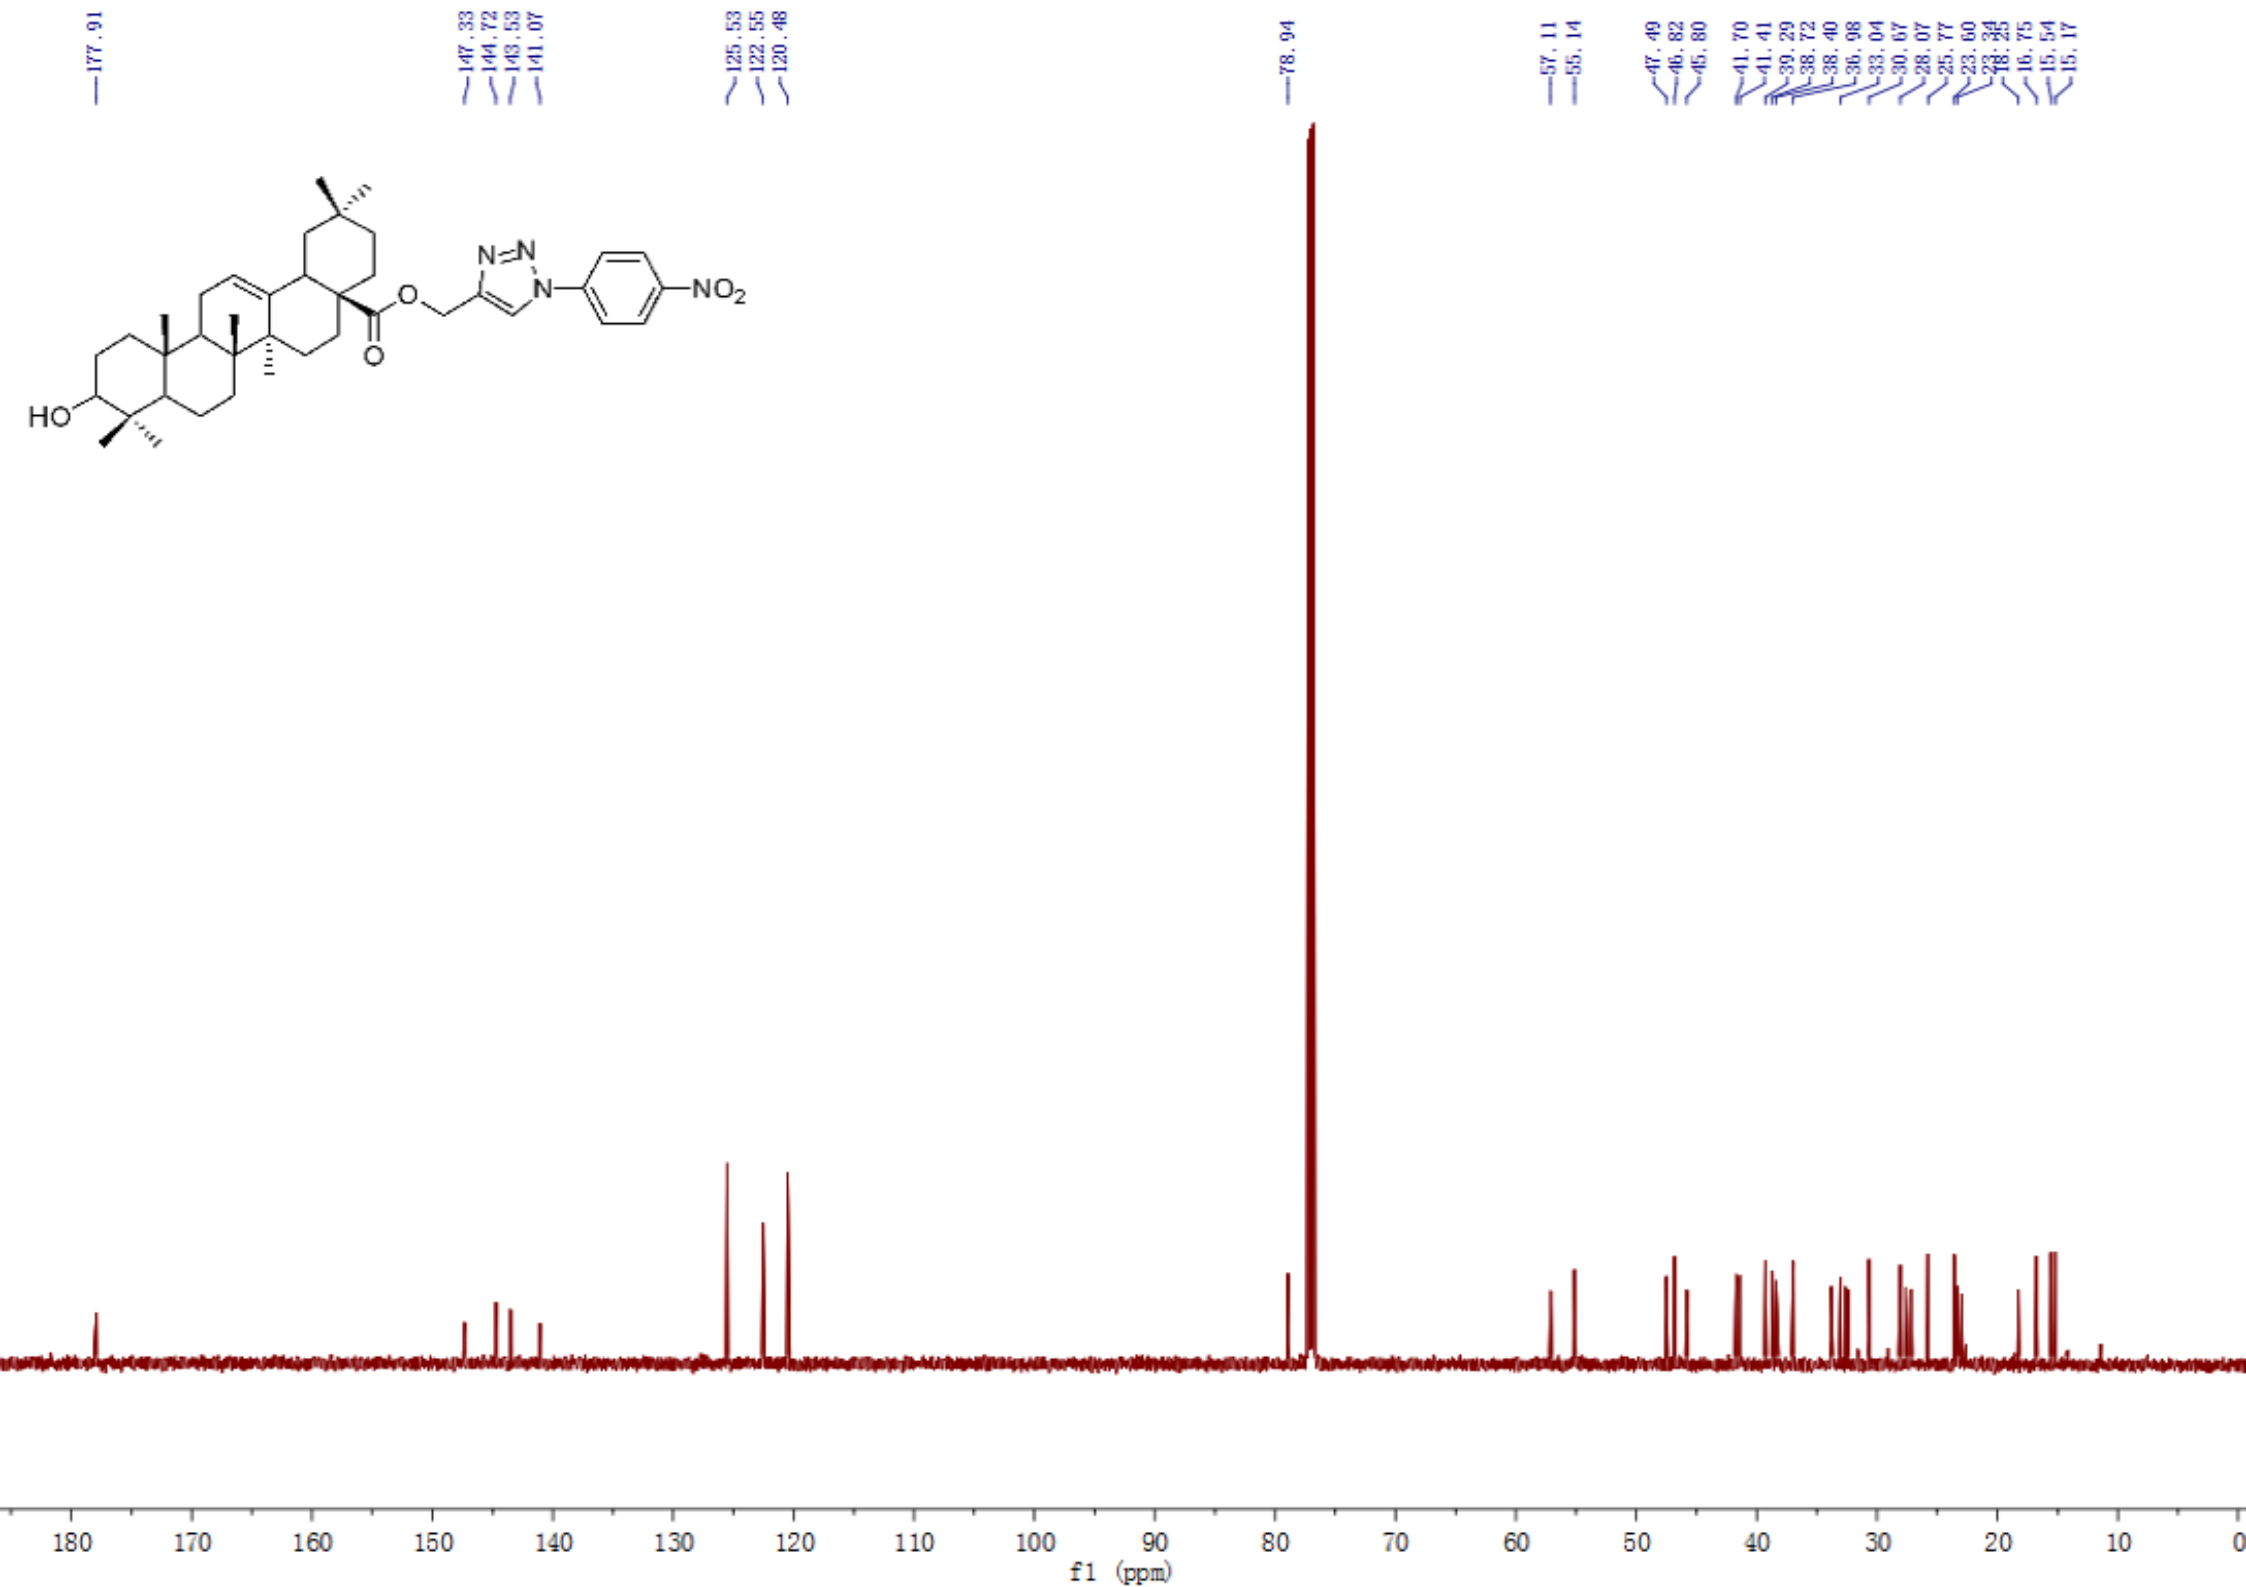



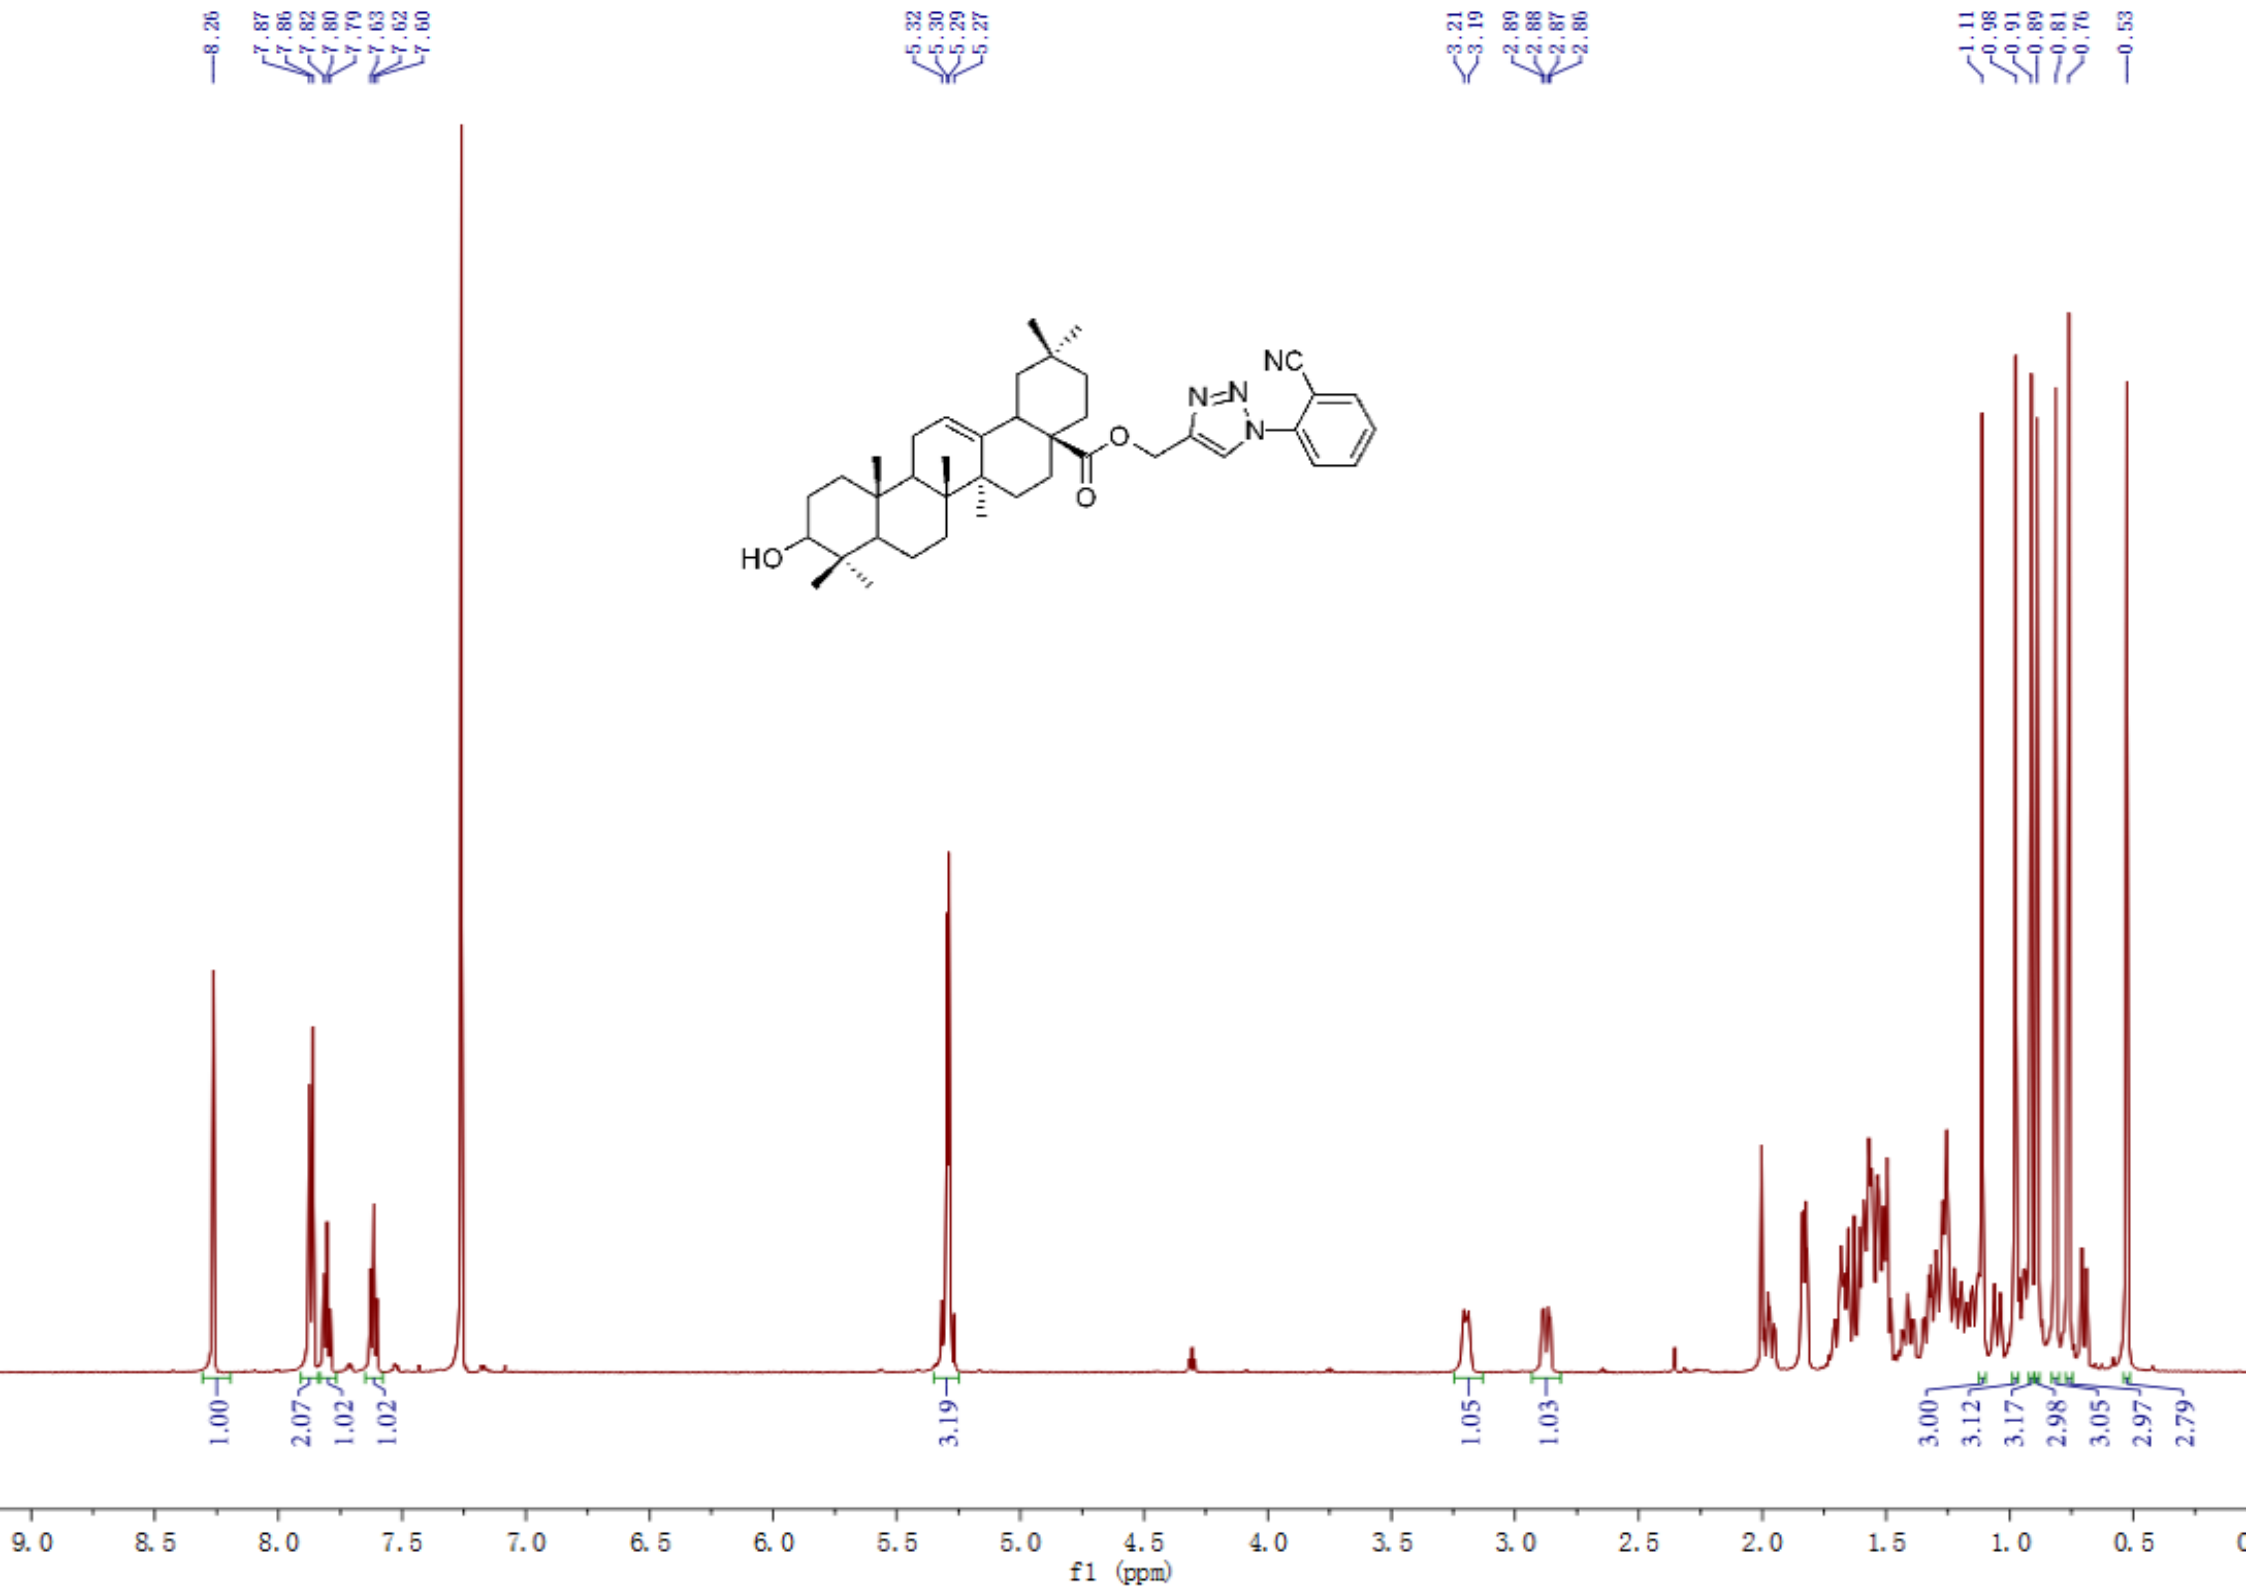

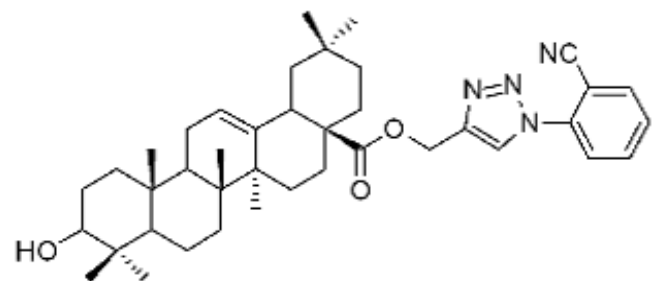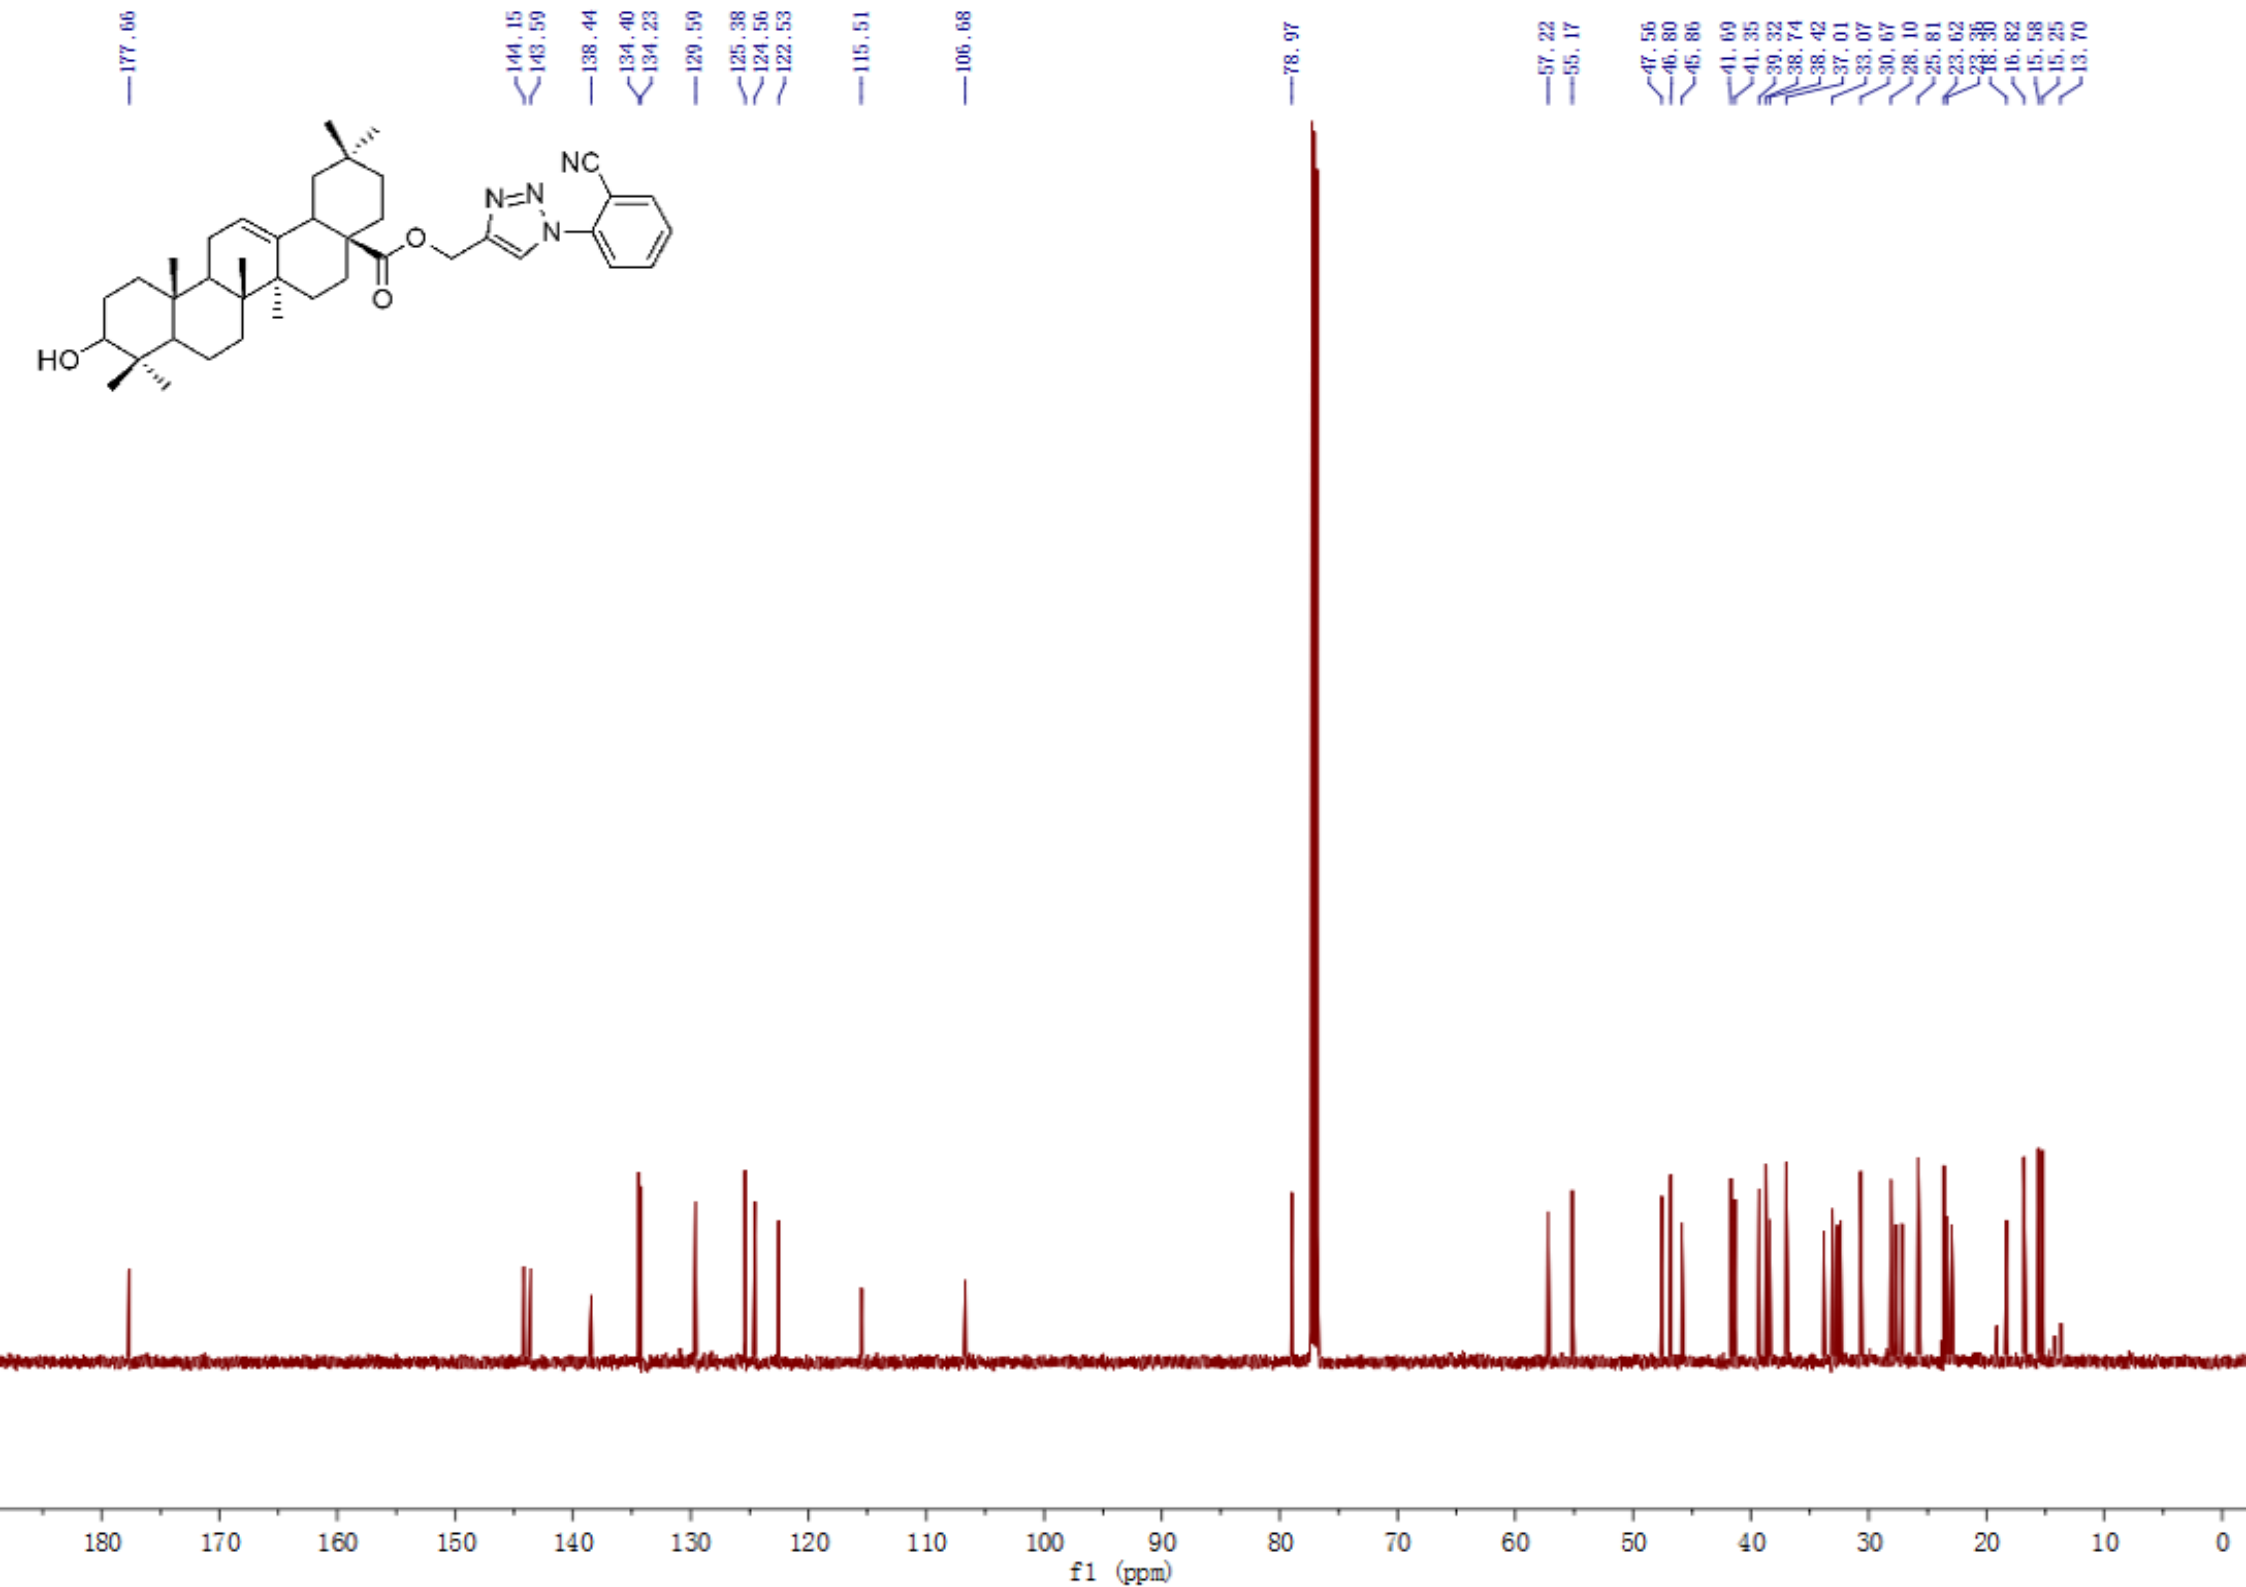

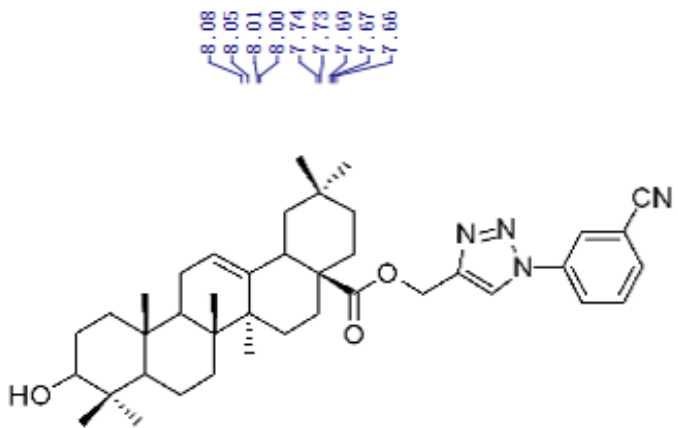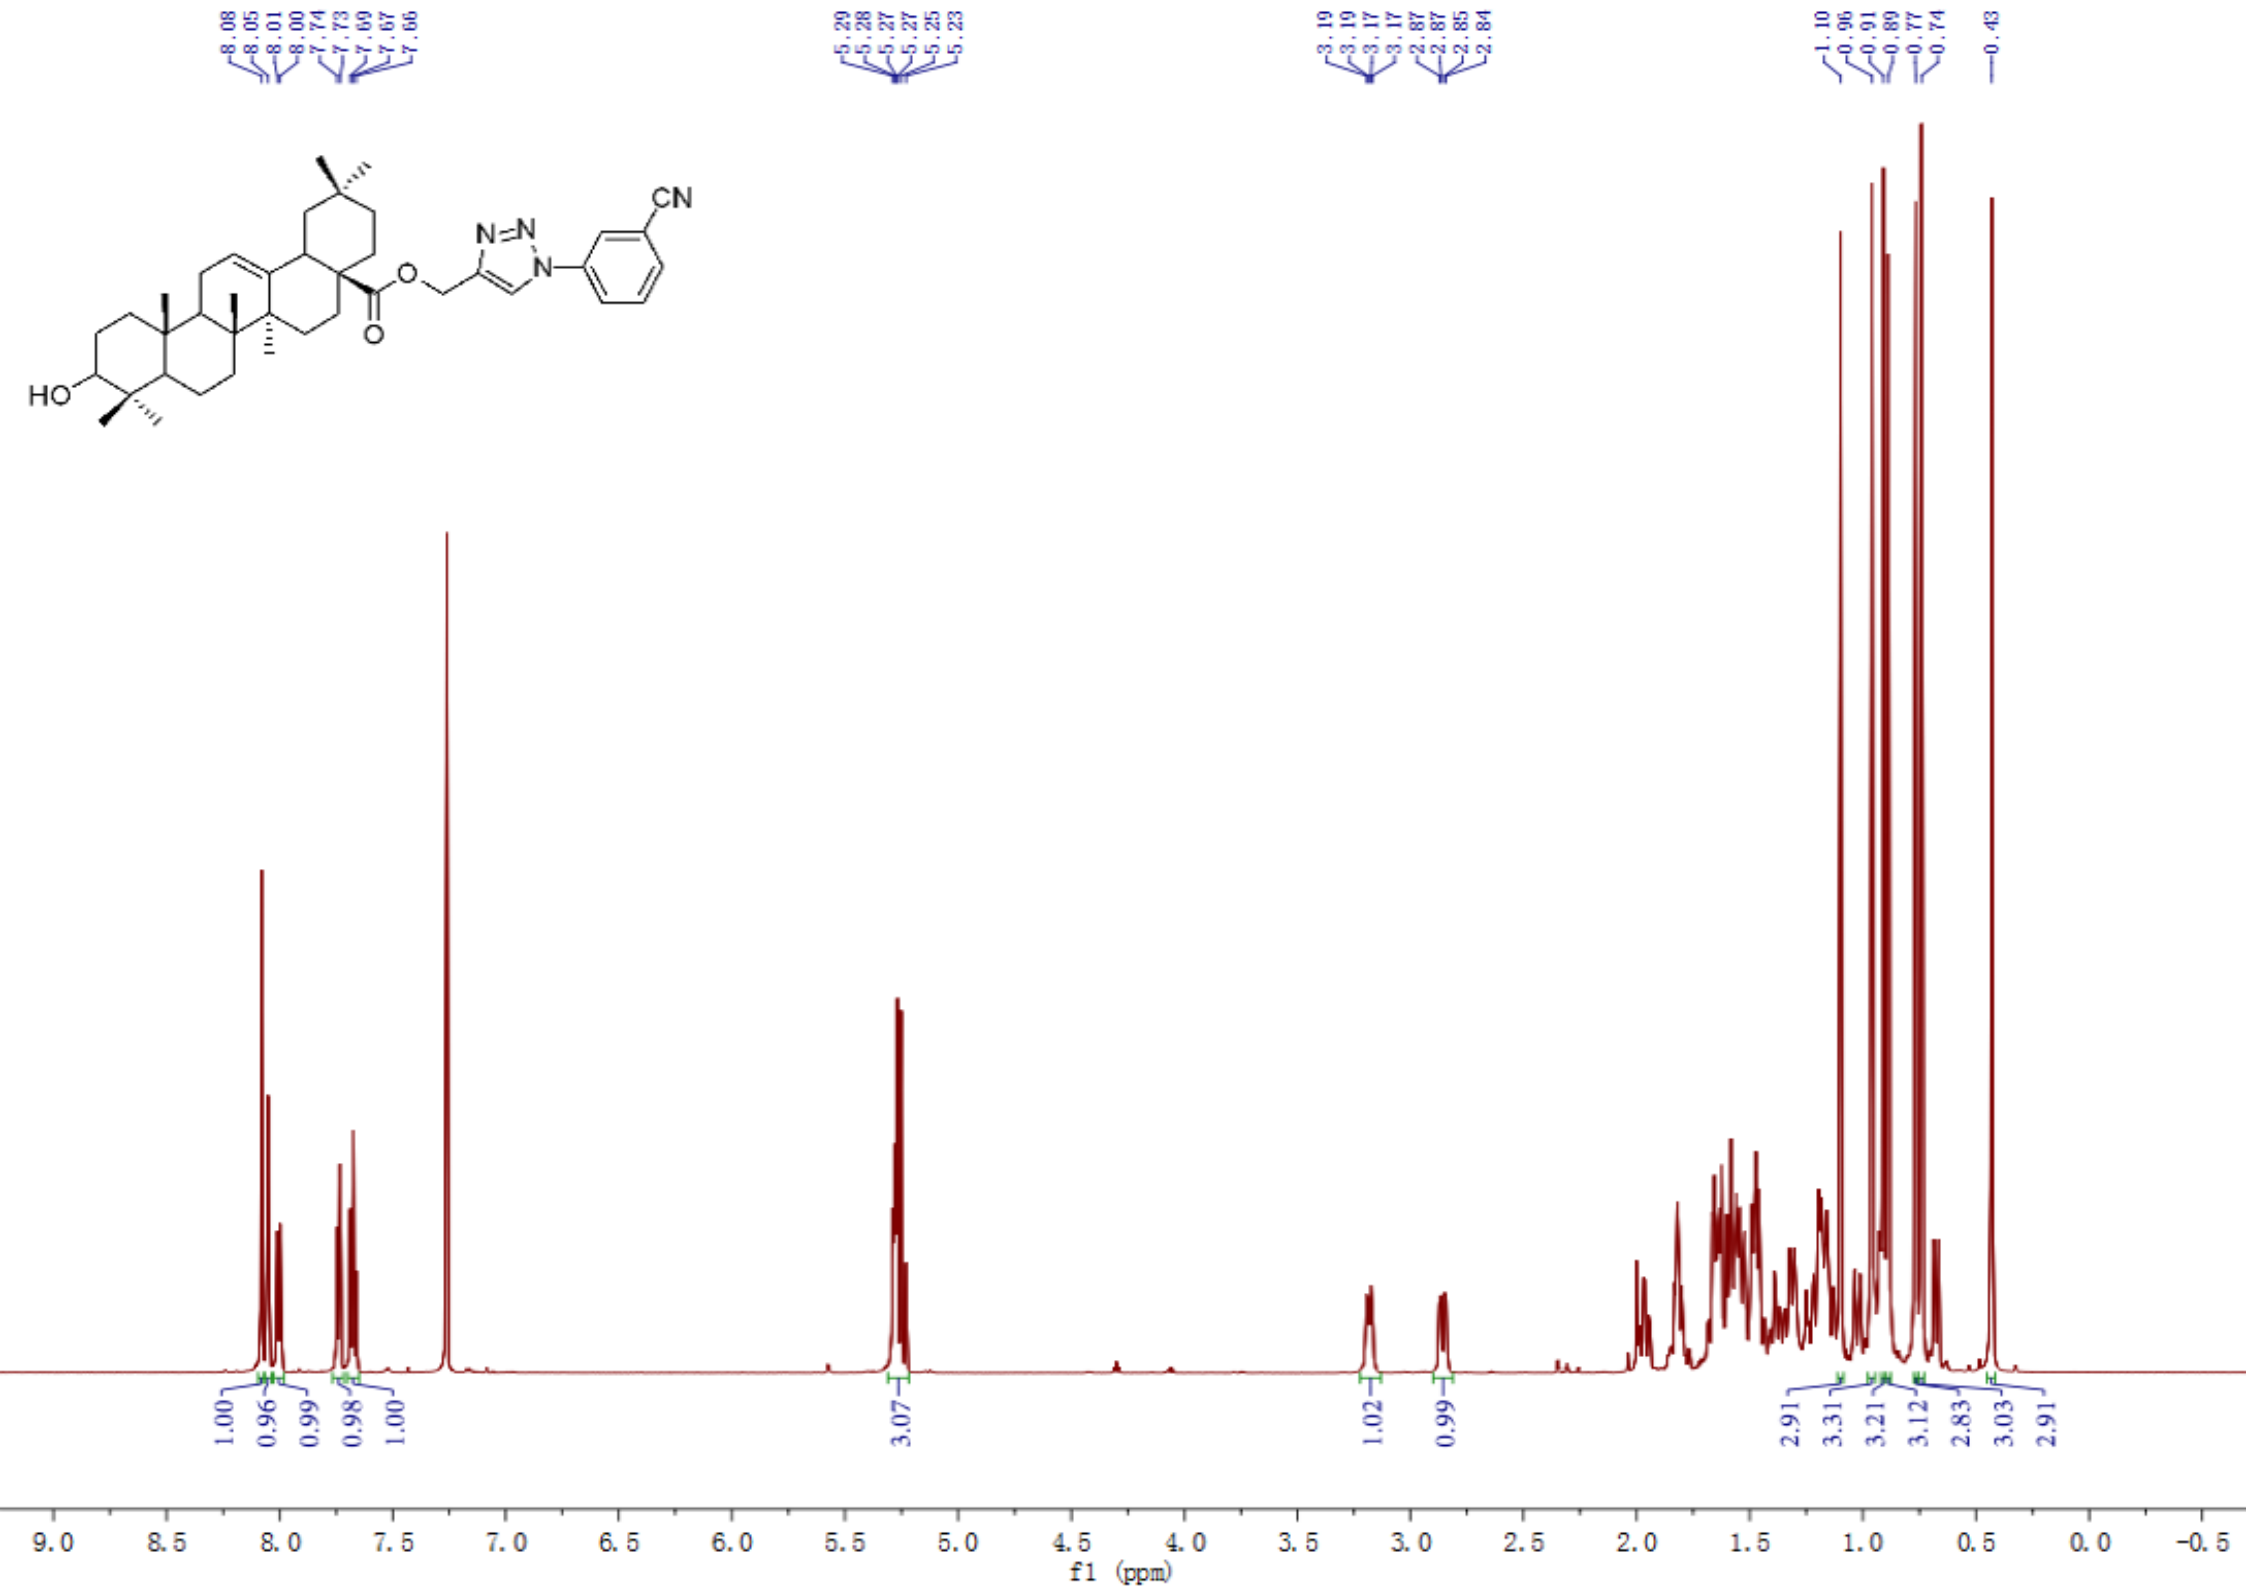

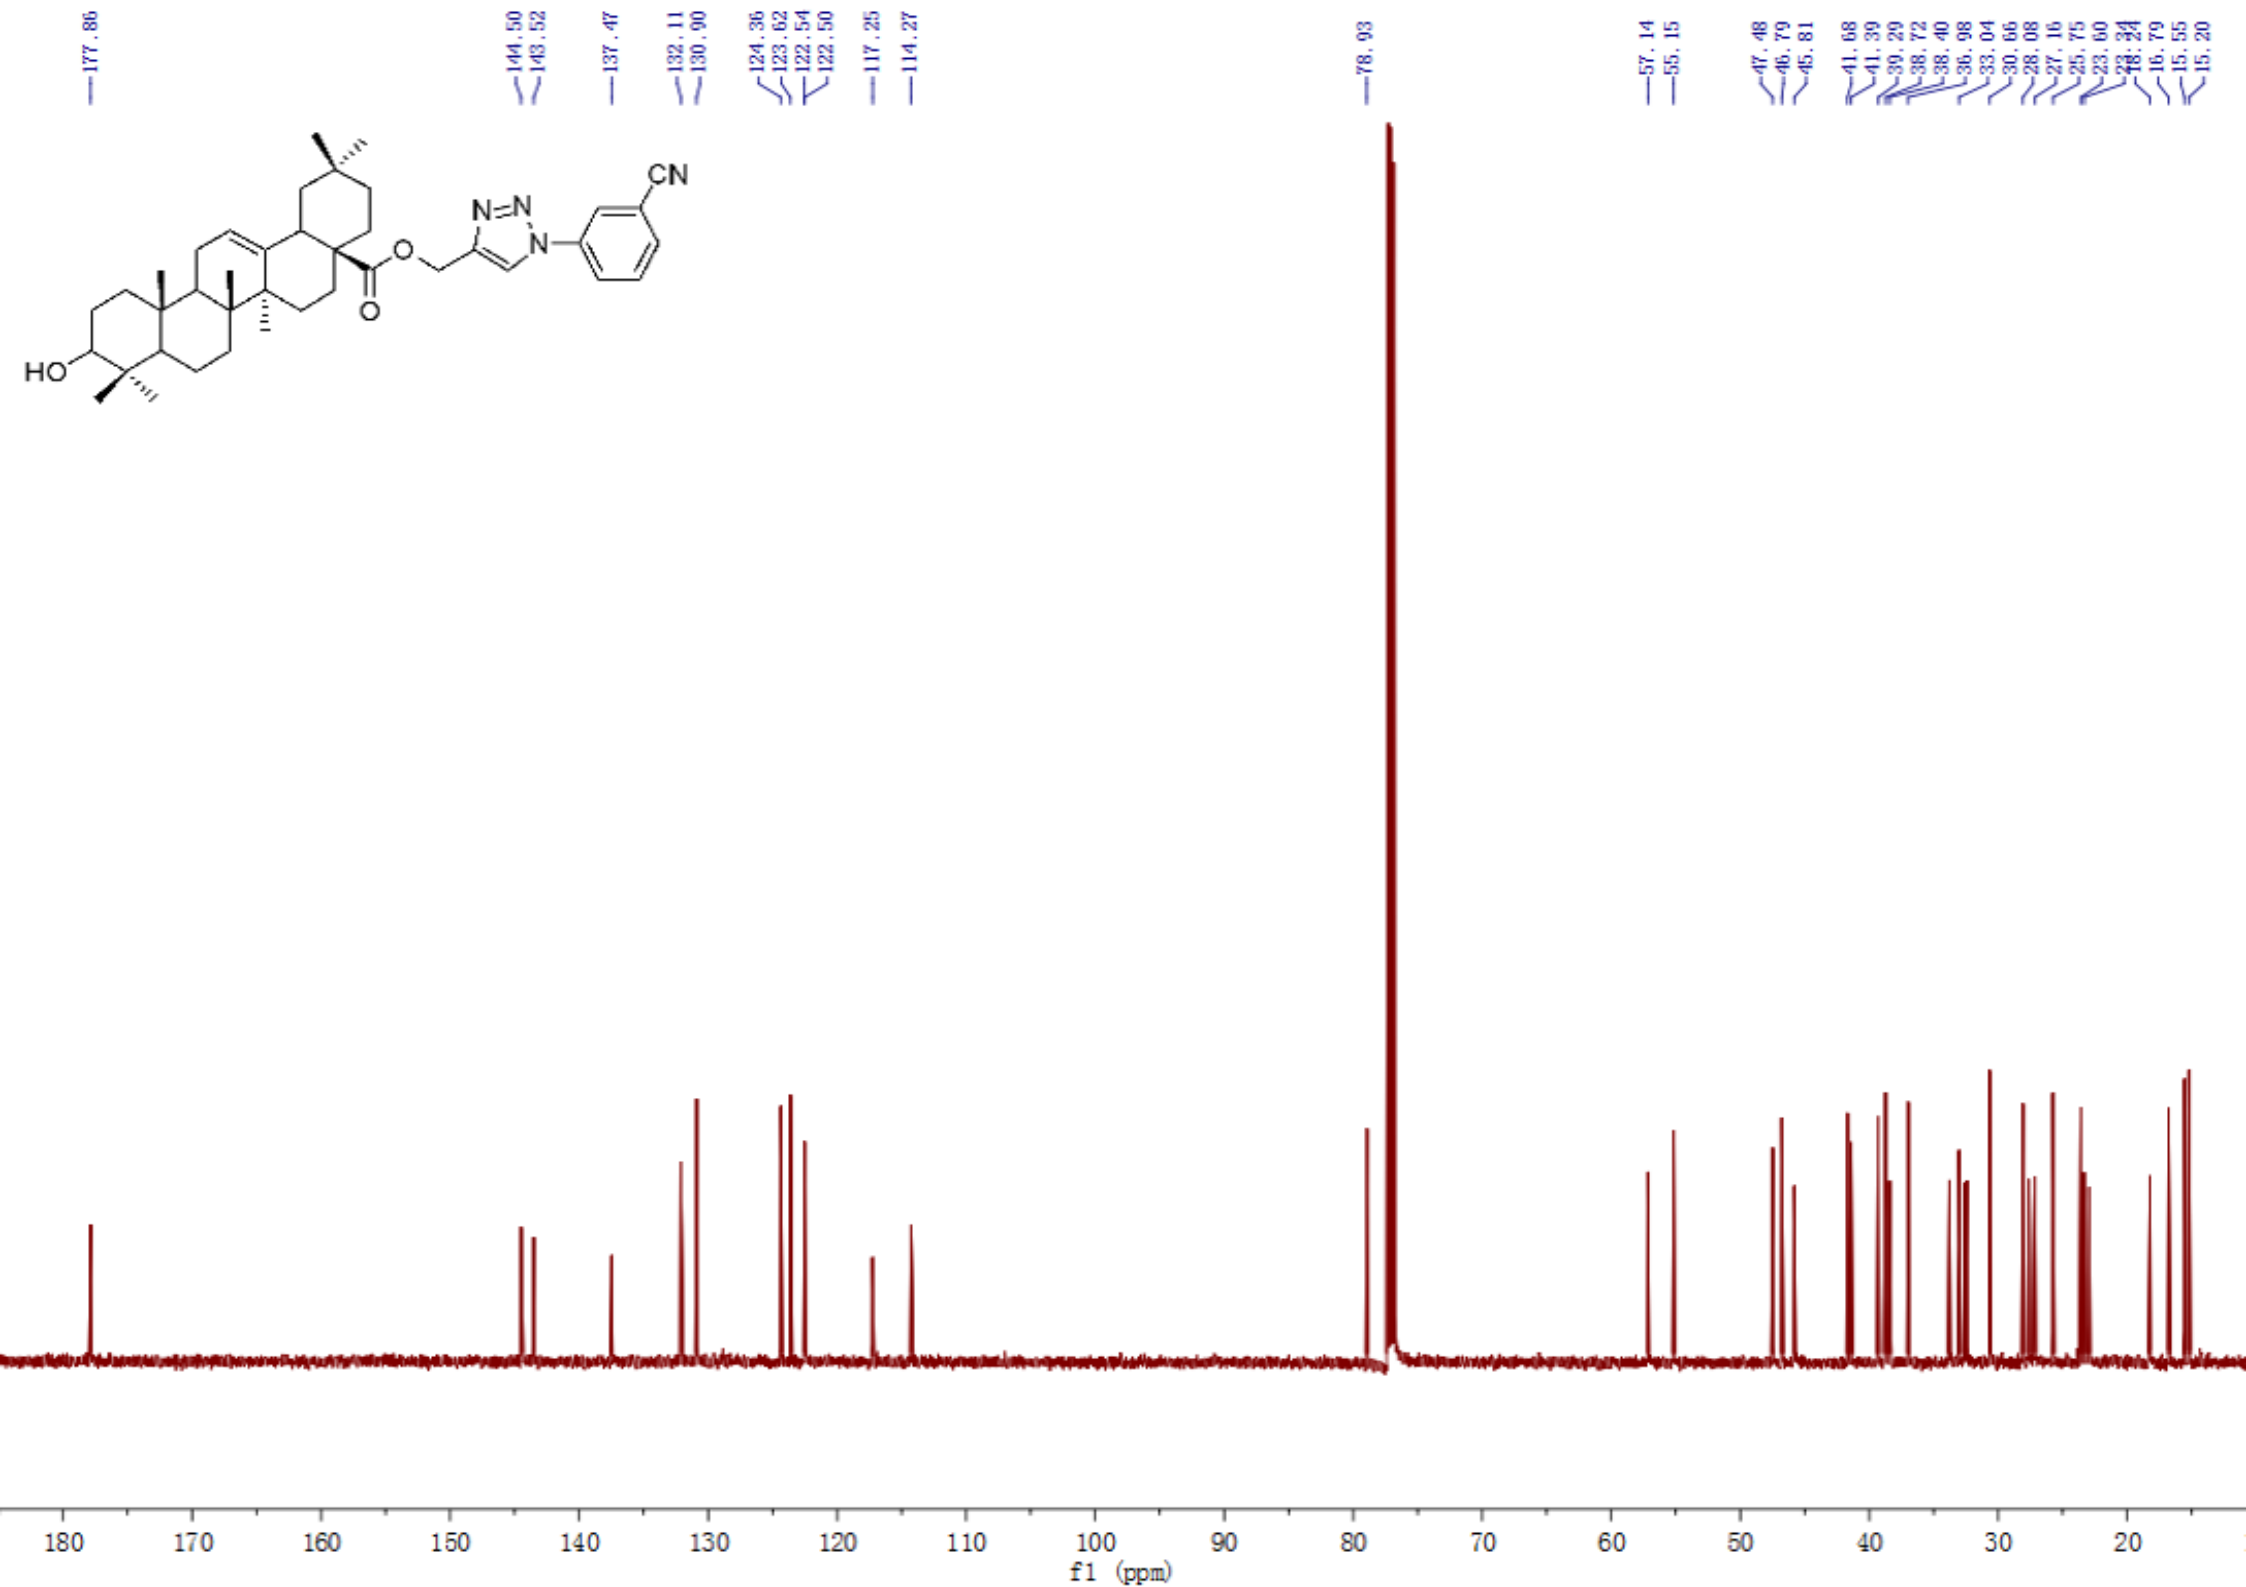

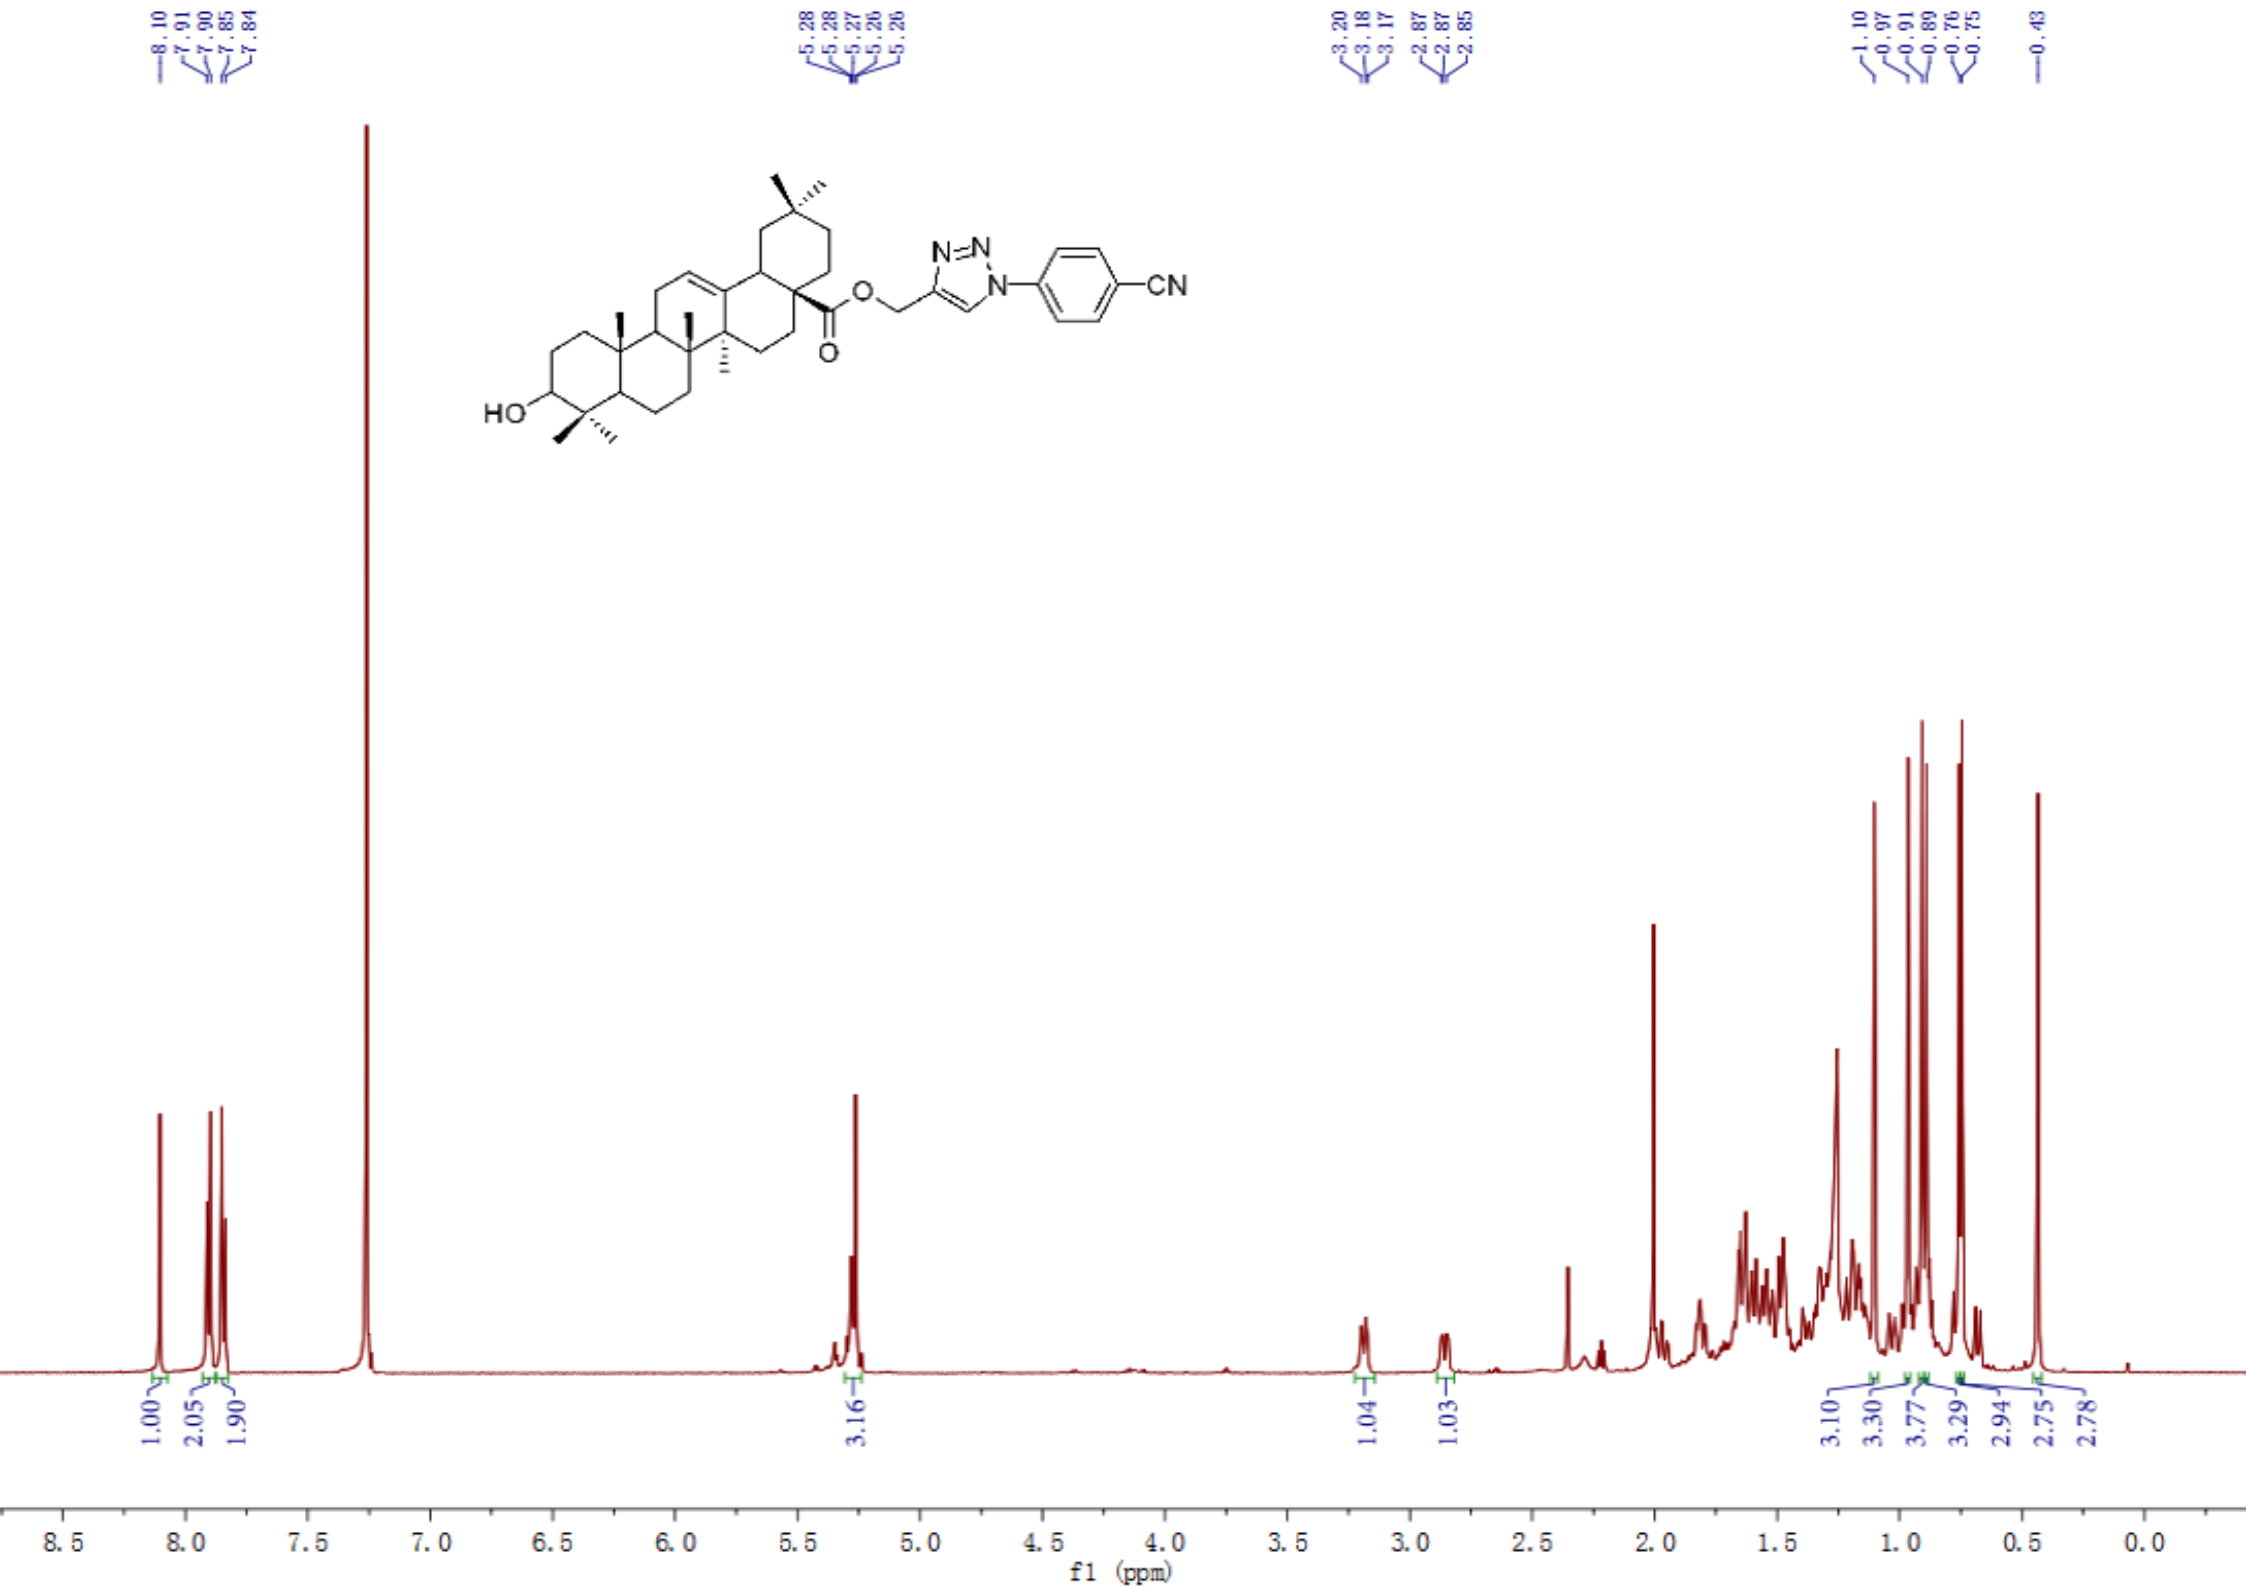

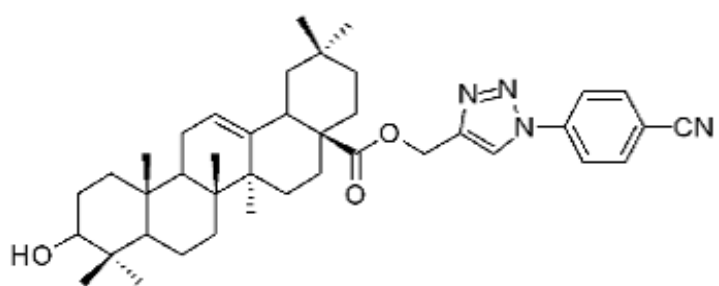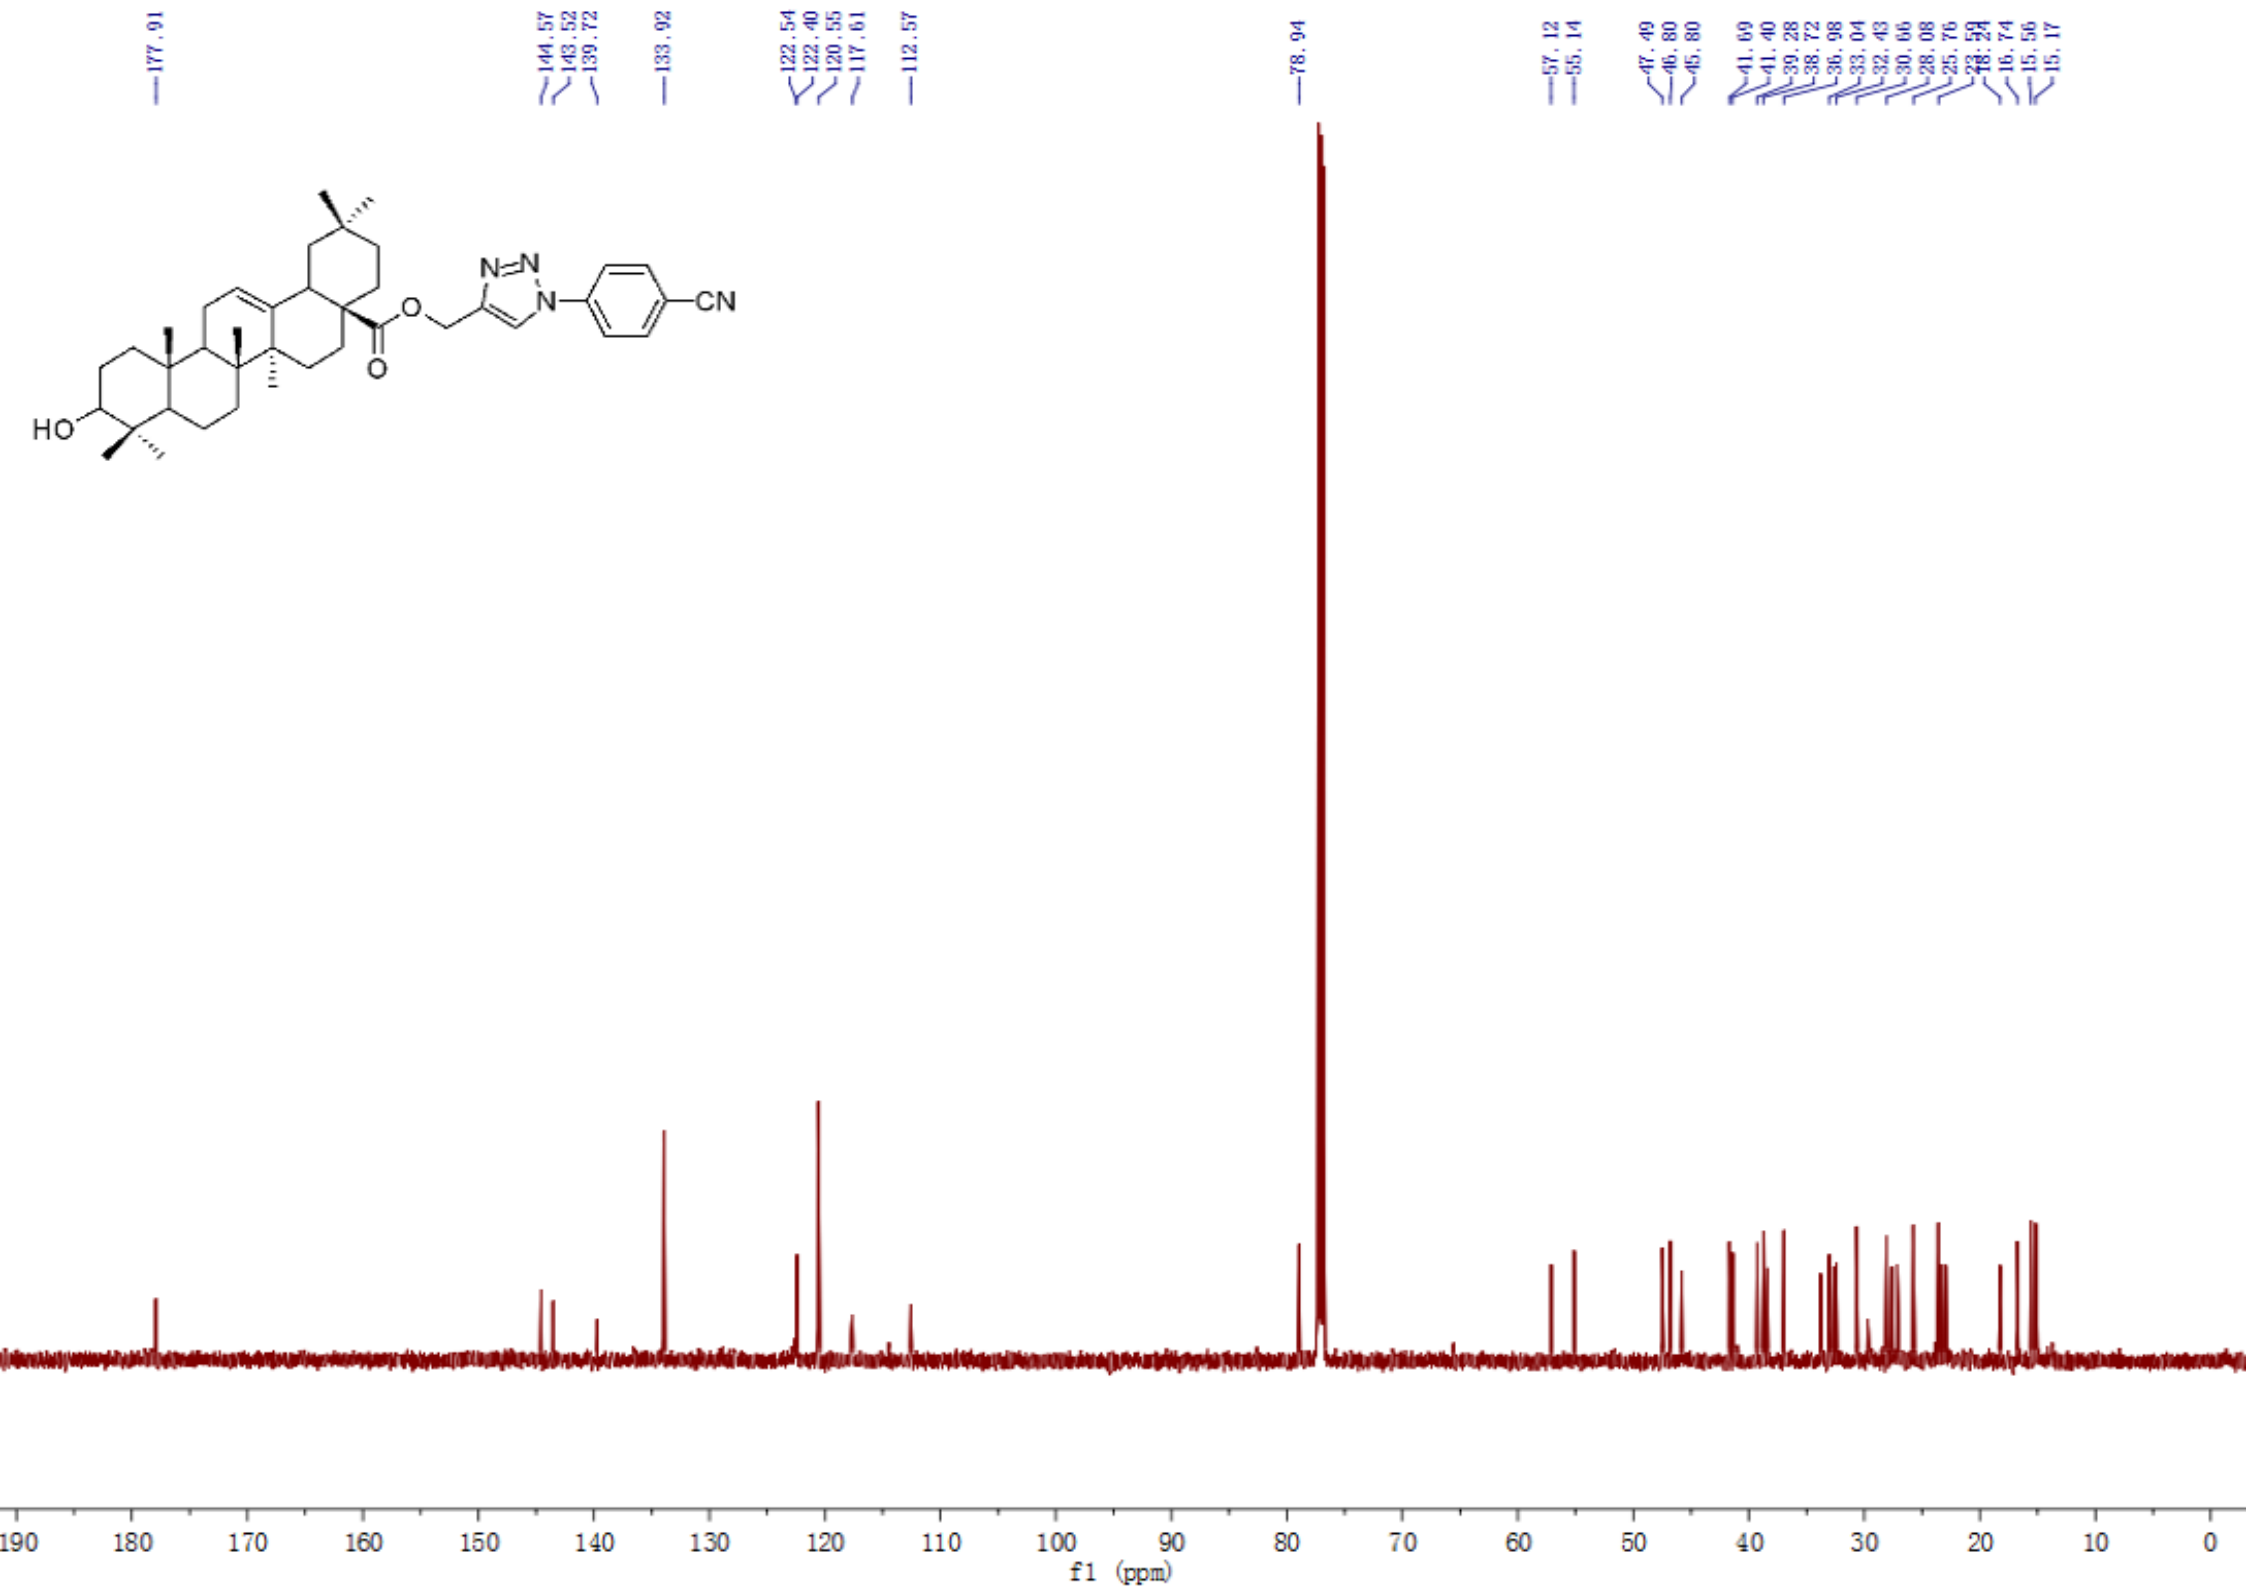

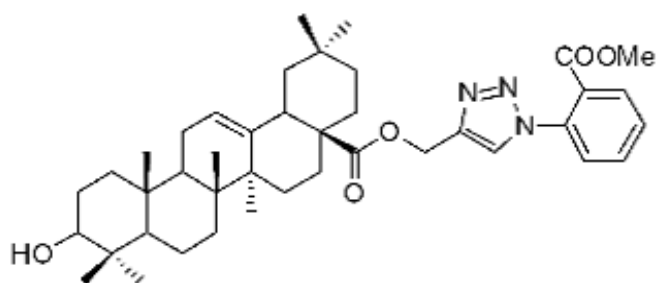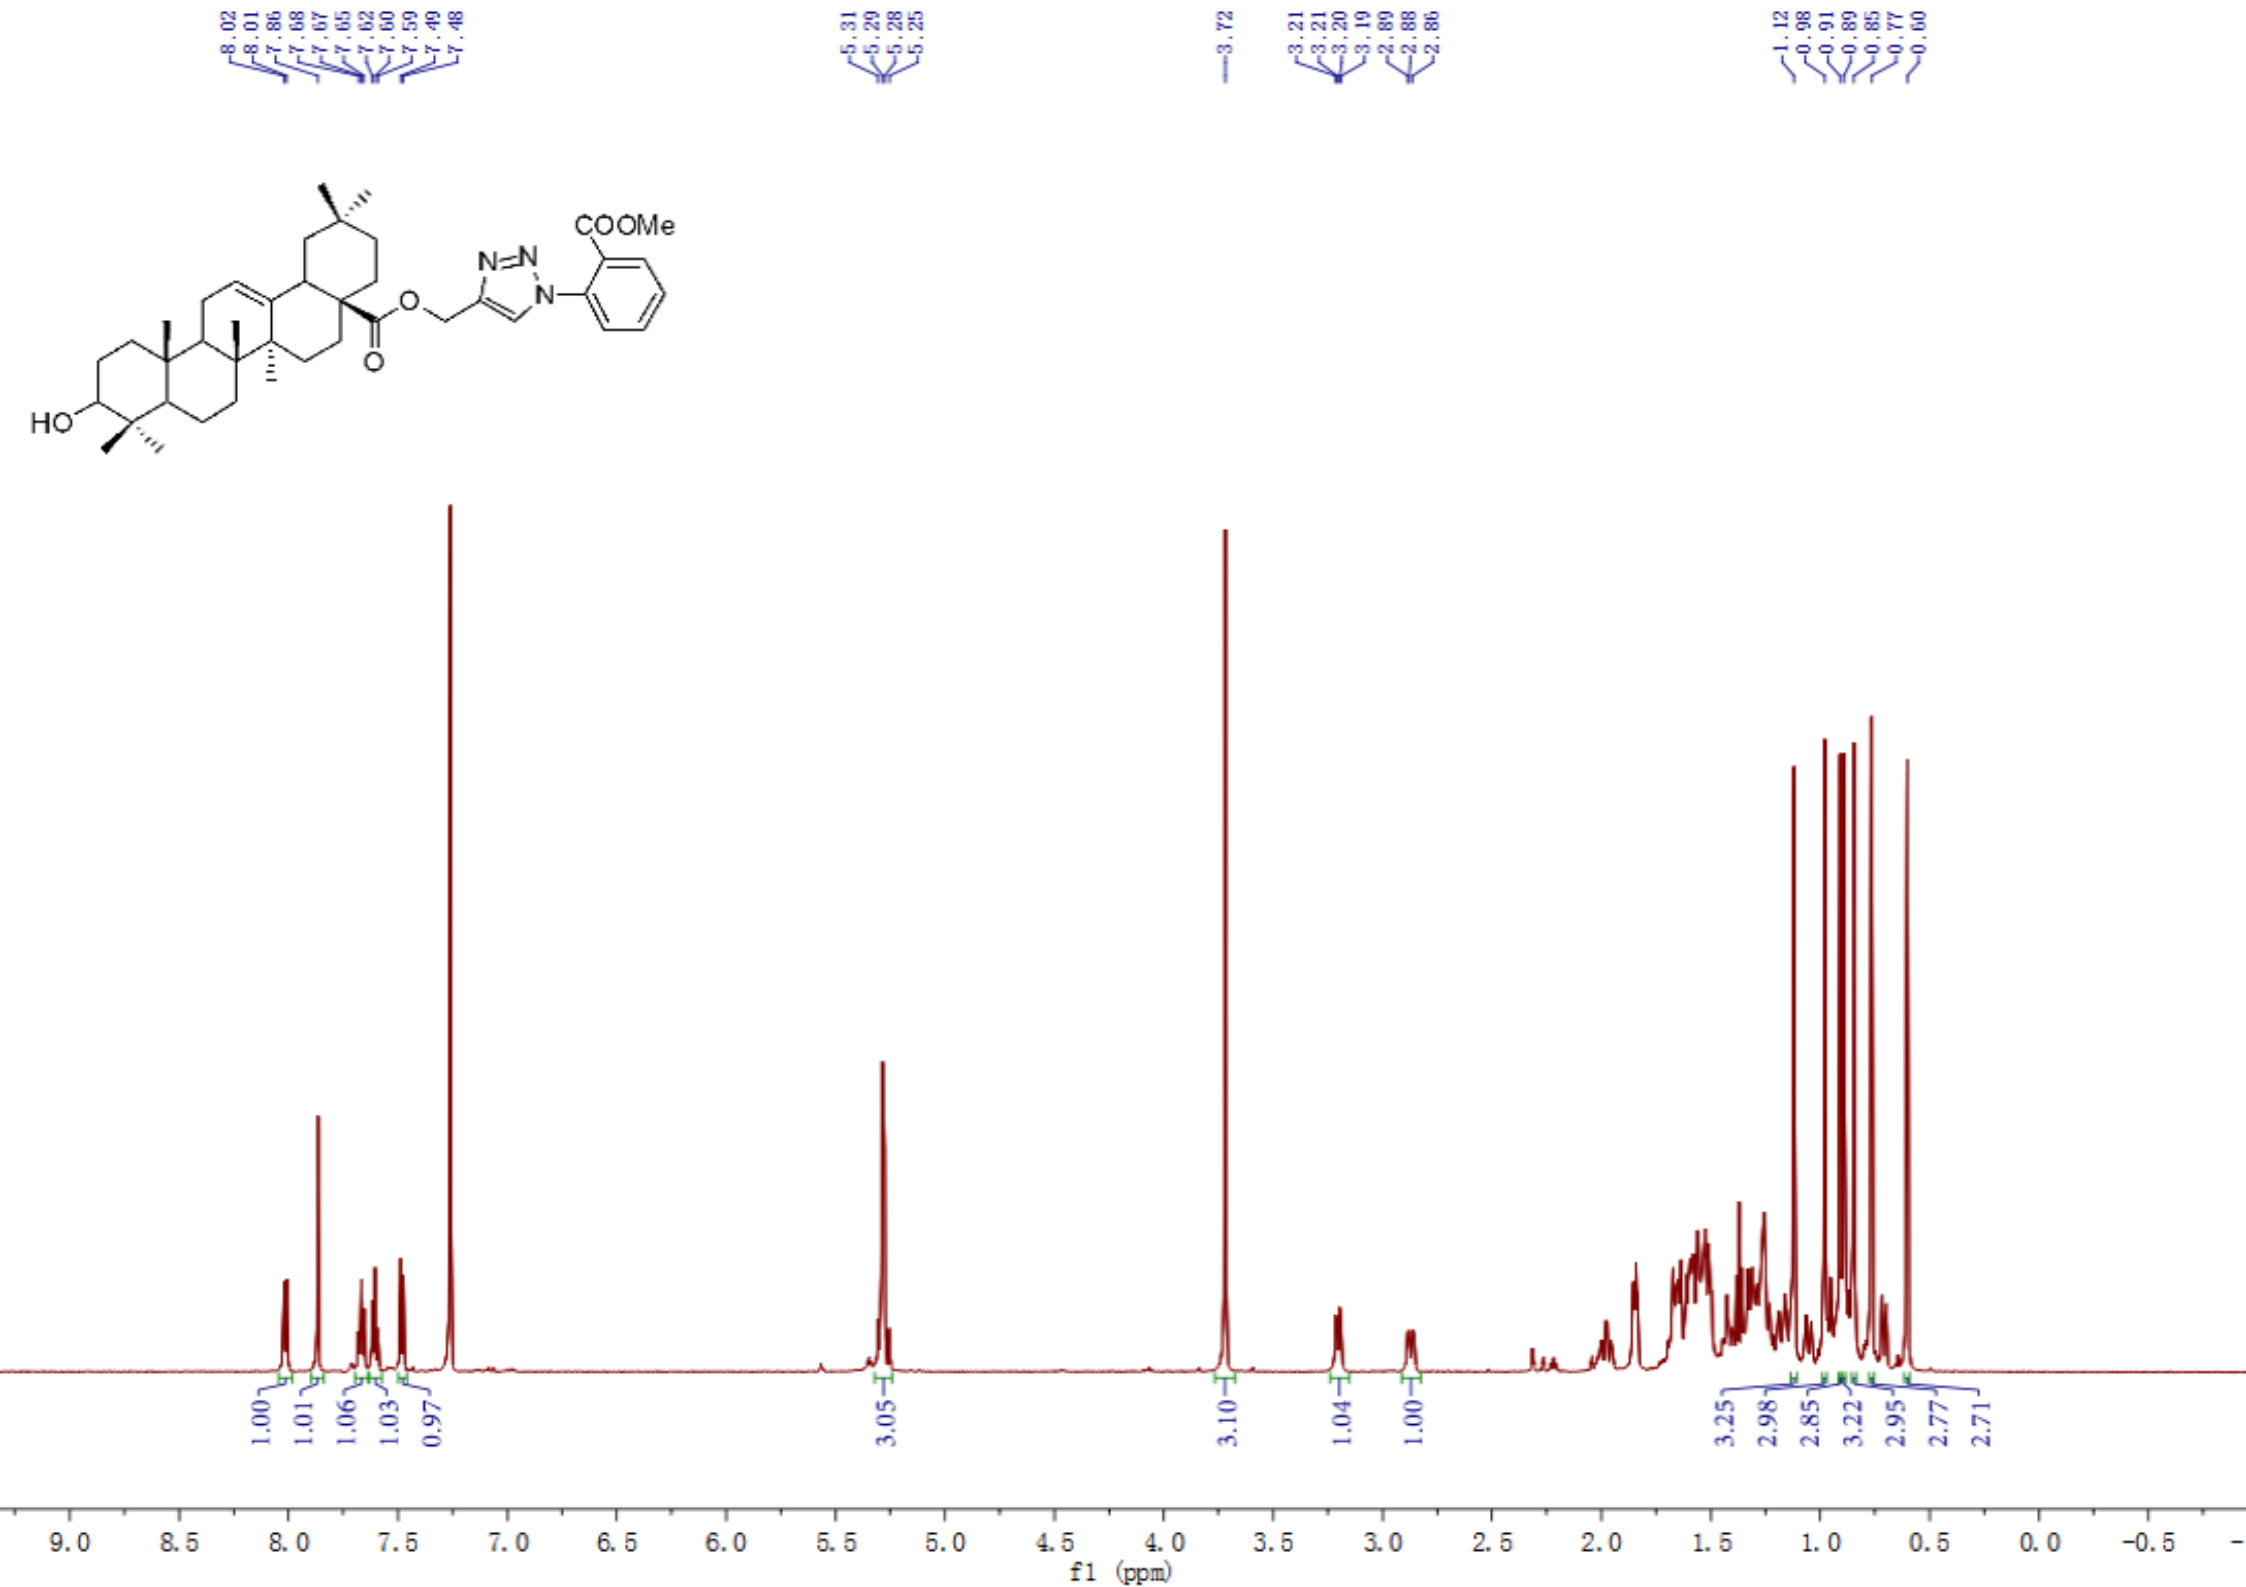

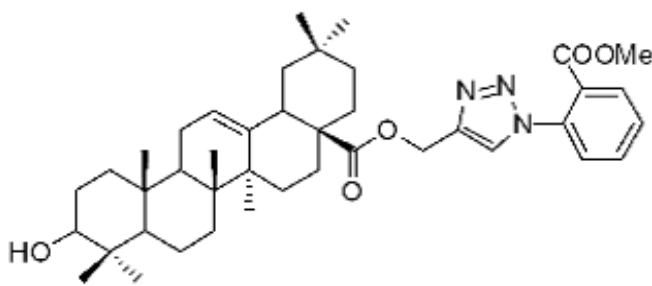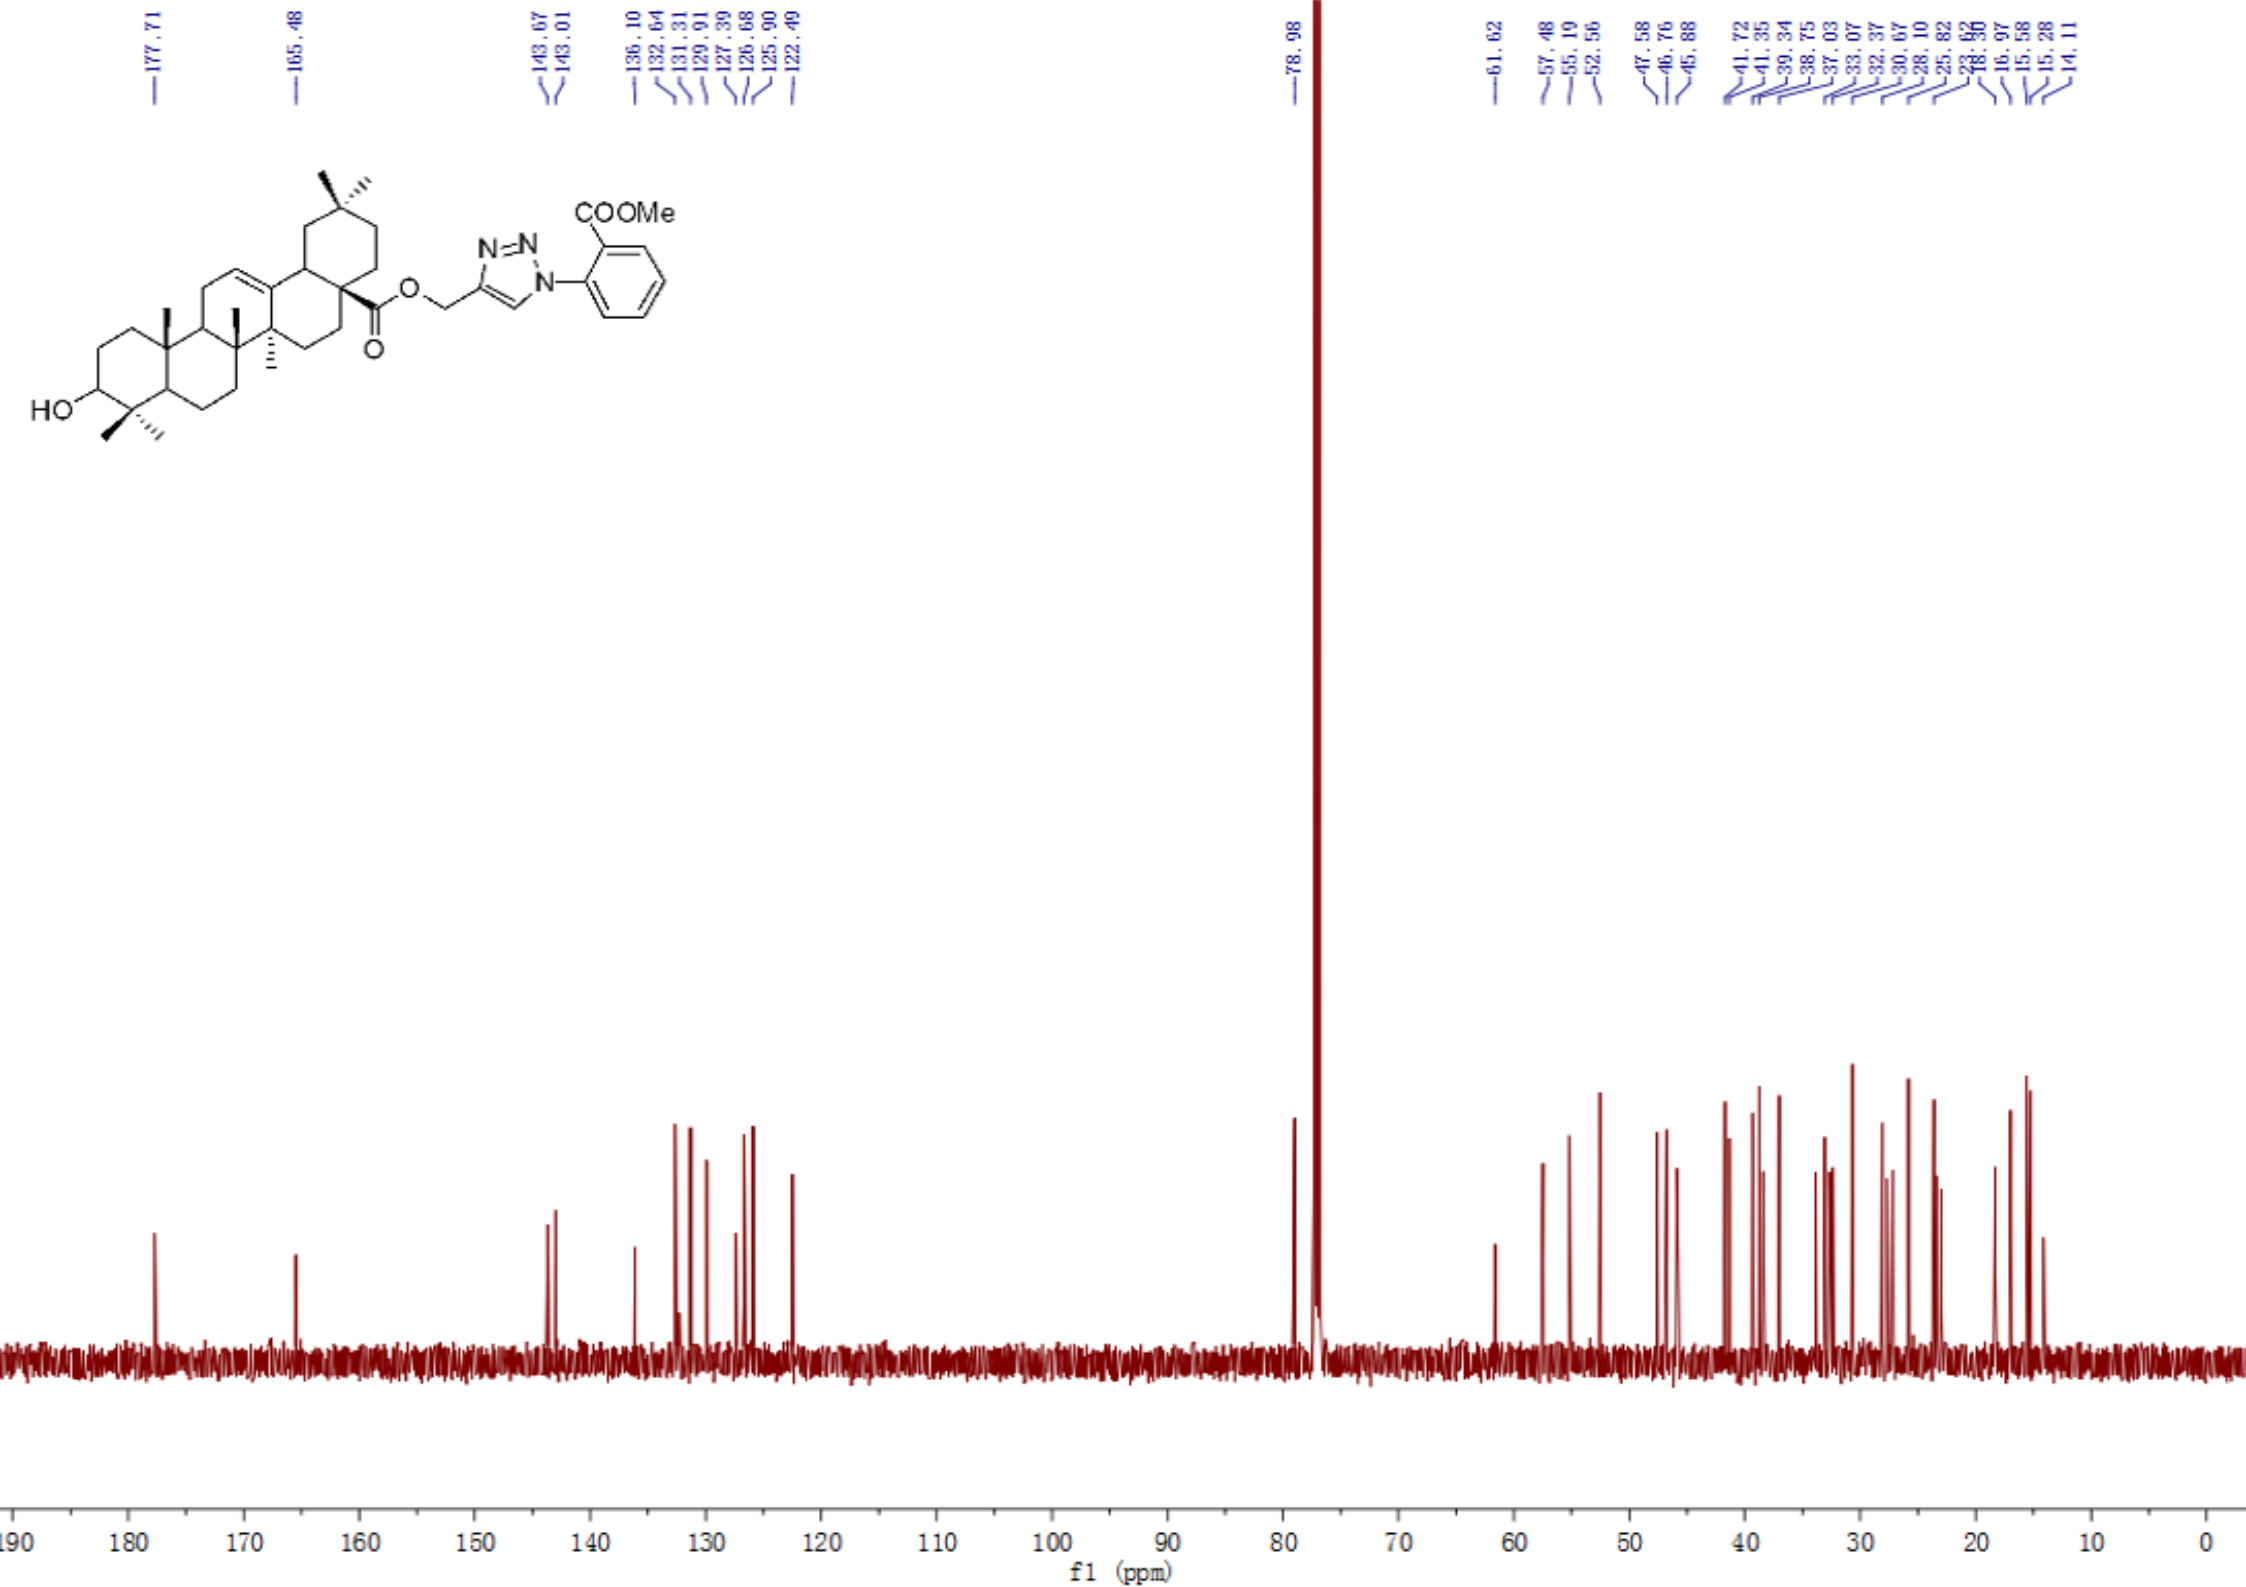



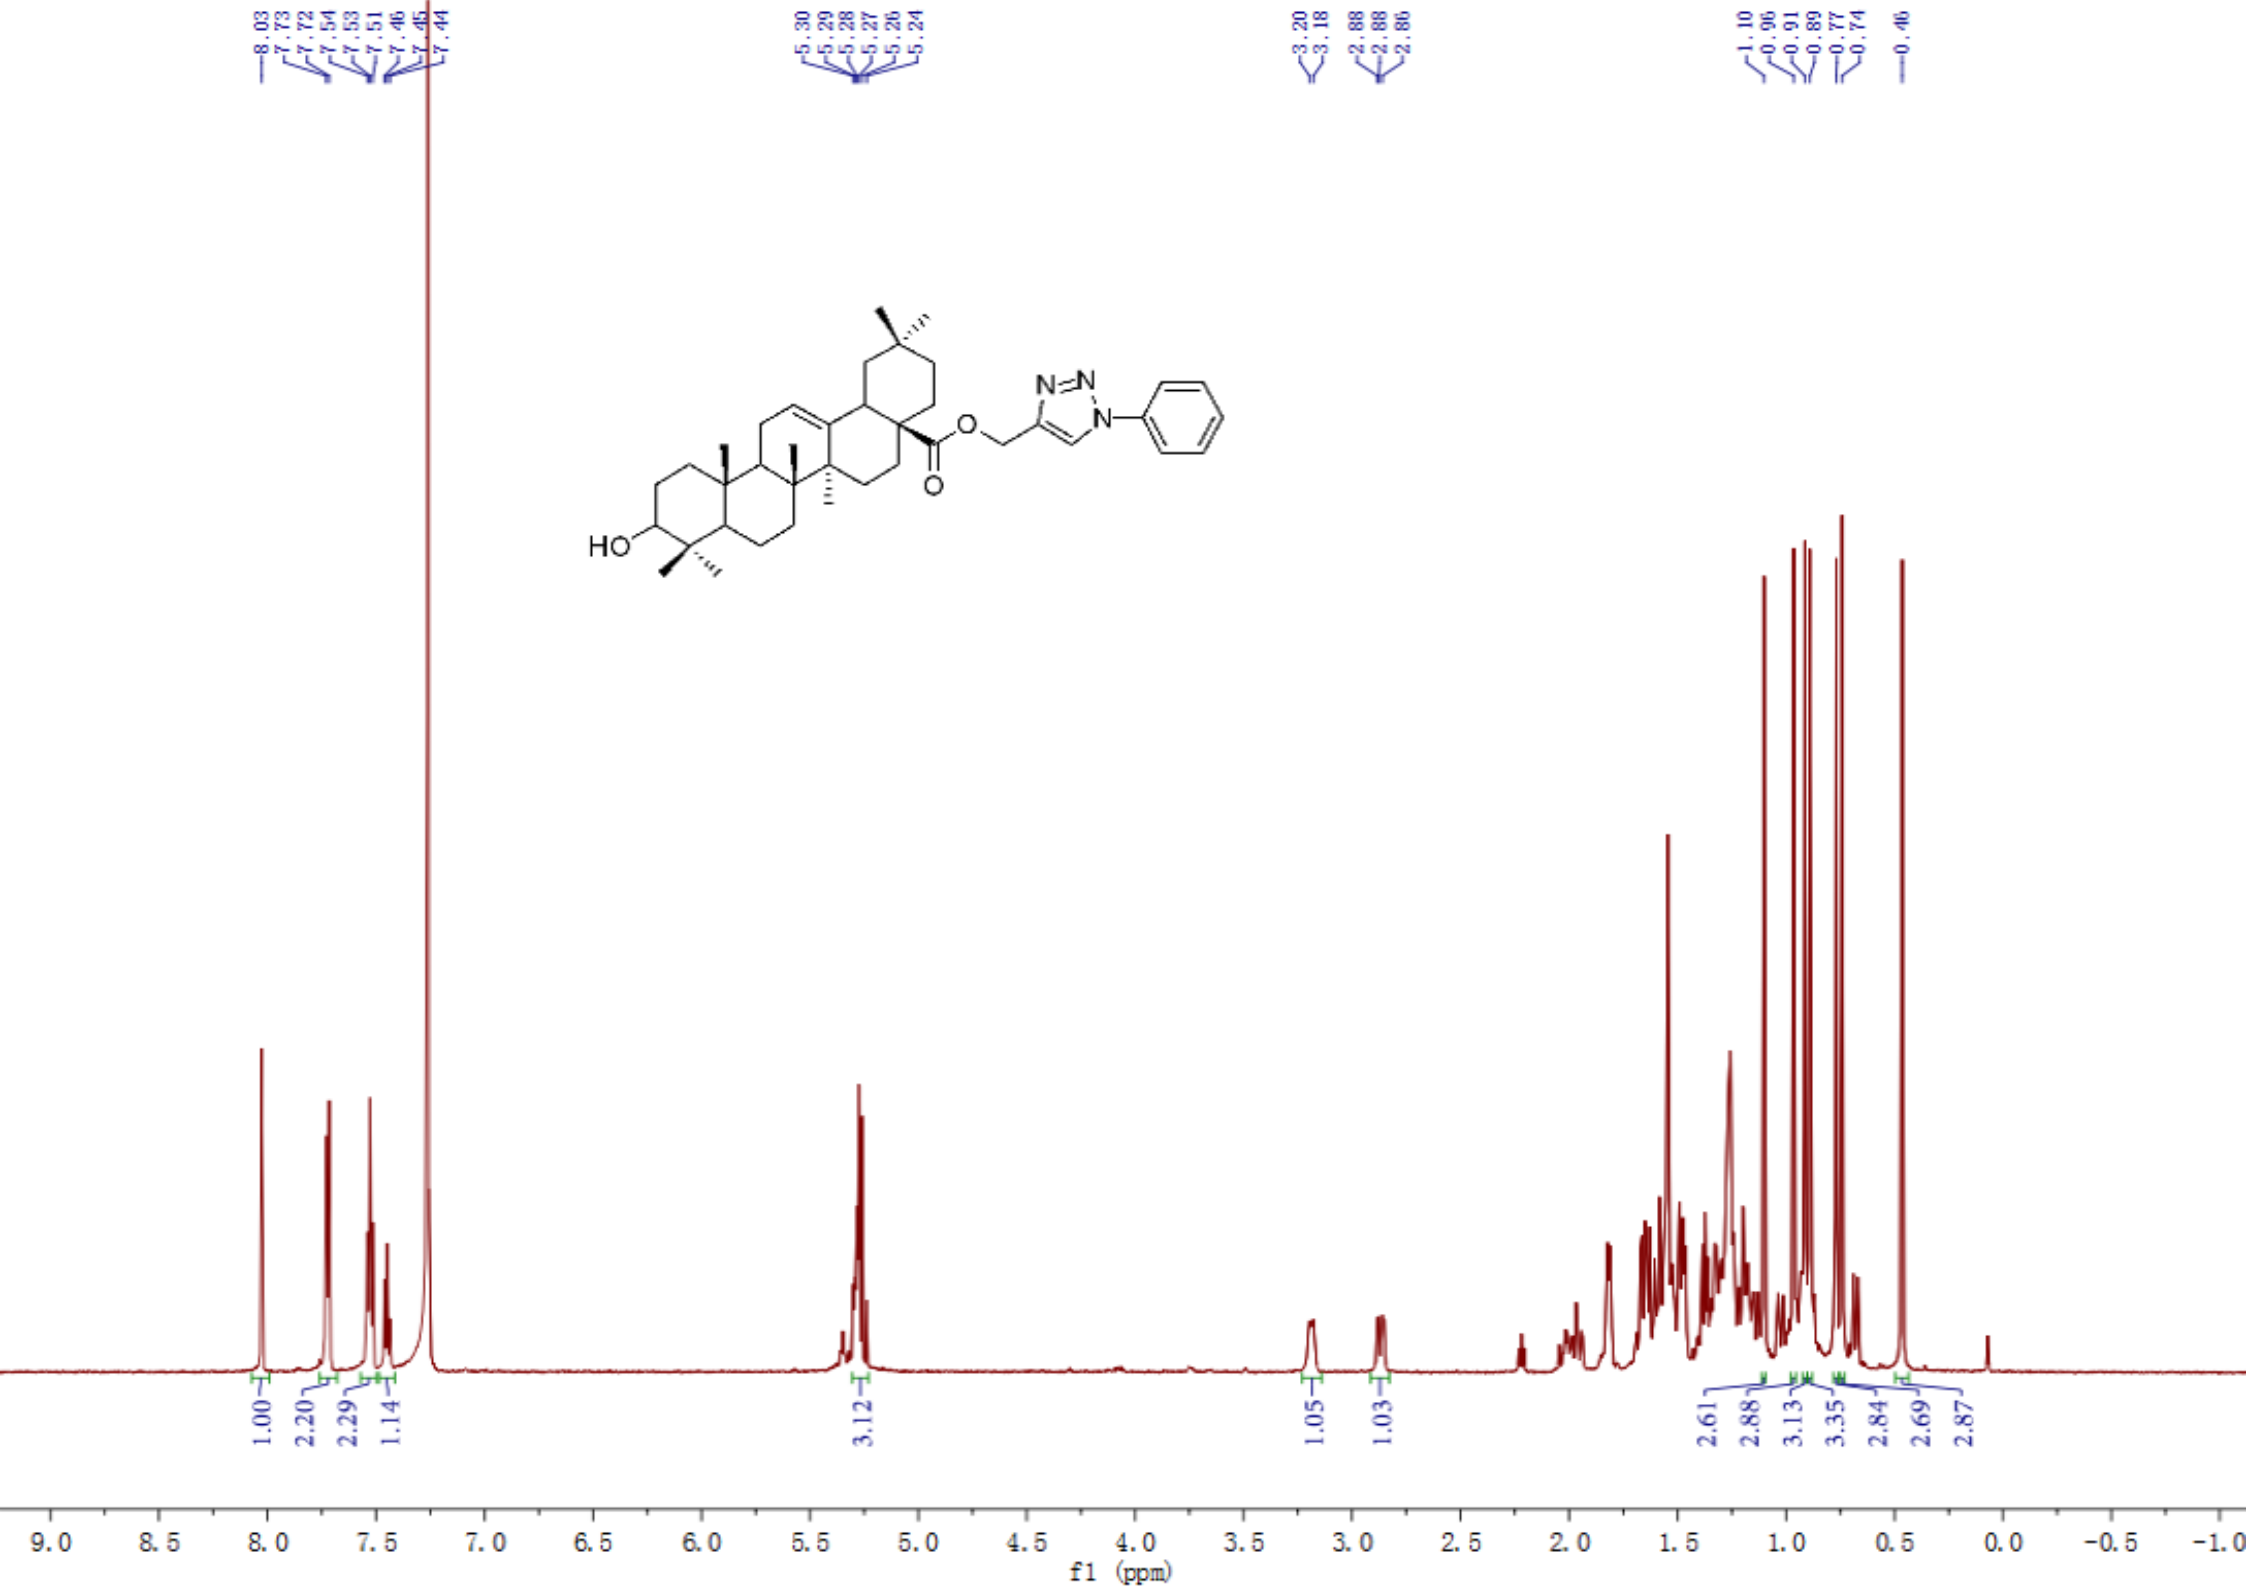

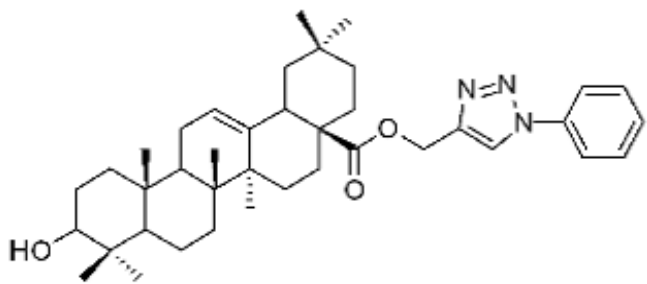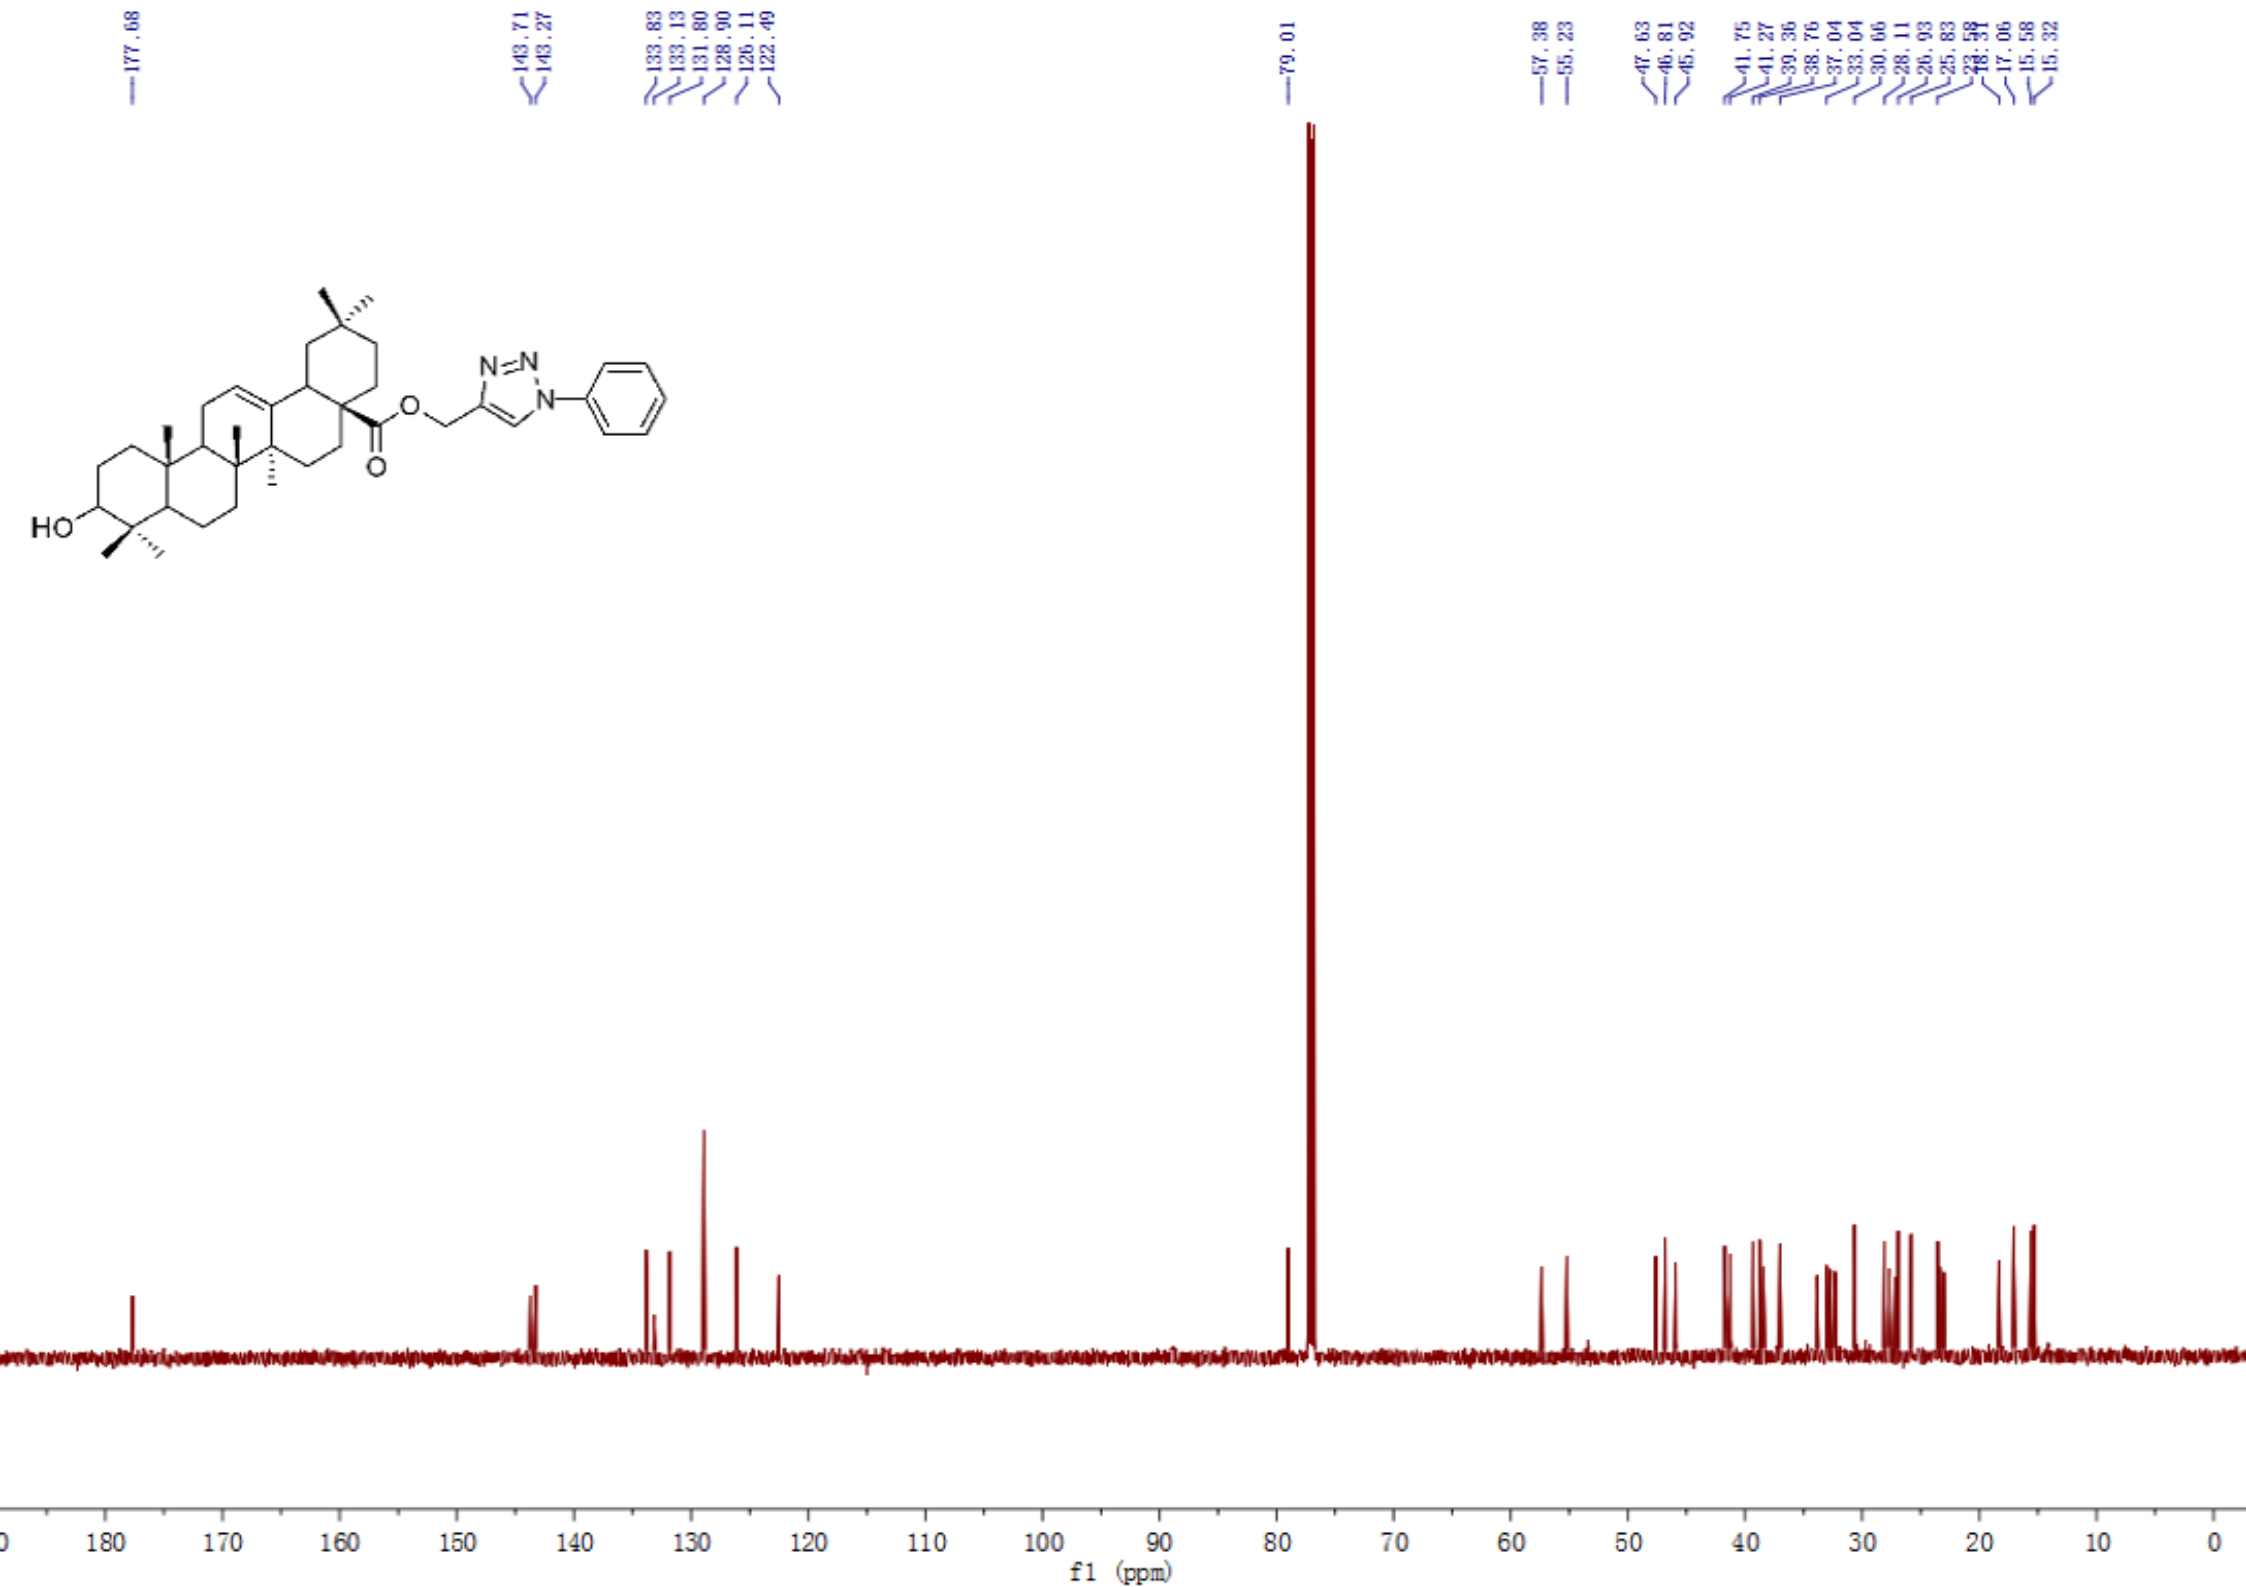

Supplement: c4ob01605j1.pdf [file c4ob01605j1.pdf]
